# Supplementary material
Source: Royal Society of Chemistry journal article supplement (doi:10.1039/d6qo00285d)
Supplement: d6qo00285d1.pdf [file d6qo00285d1.pdf]

## Supporting Information

### Transfer Hydrogenation of gem-Diester-substituted Cyclopropenes Enables the Synthesis of $\gamma$ -Amino-acid Derivatives and $\gamma$ -Lactams Bearing Multiple Stereocenters

Shouang Lan,<sup>†,§</sup> Siyu Shi,<sup>‡,§</sup> Chao Xu,<sup>†</sup> Chunyun Jang,<sup>†</sup> Jinggong Liu,<sup>‡</sup> Shuang Yang,<sup>†</sup> Xinqiang Fang\*<sup>†</sup>

<sup>‡</sup>Fujian Normal University, Fuzhou, 350108, China.

<sup>†</sup>State Key Laboratory of Structural Chemistry, Fujian Institute of Research on the Structure of Matter, University of Chinese Academy of Sciences, Fuzhou 350100, China.

<sup>‡</sup>State Key Laboratory of Traditional Chinese Medicine Syndrome, The Second Affiliated Hospital of Guangzhou University of Chinese Medicine, Guangzhou 510120, China.

<sup>§</sup>These authors contributed equally to this work.

[xqfang@fjirsm.ac.cn](mailto:xqfang@fjirsm.ac.cn)

#### Table of Contents

|             |                                                                                                    |     |
|-------------|----------------------------------------------------------------------------------------------------|-----|
| <b>I</b>    | General Information                                                                                | S1  |
| <b>II</b>   | X-Ray Crystallographic Analysis                                                                    | S2  |
| <b>III</b>  | Typical Procedures for the Preparation of Substrates                                               | S6  |
| <b>IV</b>   | Typical Procedures for Asymmetric Transfer Hydrogenation of gem-Diester-substituted Cyclopropenes  | S9  |
| <b>V</b>    | Typical Procedures for Asymmetric Ring-Opening of Tetrasubstituted Cyclopropanes with Nucleophiles | S9  |
| <b>VI</b>   | Typical Procedure for the Asymmetric Ring-Closing Reaction of <b>4a</b>                            | S10 |
| <b>VII</b>  | Typical procedure of the synthesis of compound <b>2a'</b>                                          | S10 |
| <b>VIII</b> | Characterizations of New Compounds                                                                 | S11 |
| <b>IX</b>   | NMR Spectra of New Compounds                                                                       | S40 |
| <b>X</b>    | HPLC Spectra for ee Determination                                                                  | S97 |

#### I. General Information

Commercially available materials were used as received, unless otherwise noted, all reactions and manipulations involving air- or moisture-sensitive compounds were performed using standard Schlenk technique. All solvents were purified and dried using typical procedures. Proton nuclear magnetic resonance (<sup>1</sup>H NMR) spectra were

recorded on a Bruker AVANCE III HD400 (400 MHz) spectrometer, a JEOL ECZ600S (600 MHz) and a JEOL ECZ400S (400 MHz). Chemical shifts were recorded in parts per million (ppm,  $\delta$ ) relative to tetramethylsilane ( $\delta = 0.00$  ppm), chloroform ( $\delta = 7.26$  ppm).  $^1\text{H}$  NMR splitting patterns are designated as singlet (s), doublet (d), triplet (t), quartet (q), dd (doublet of doublets), m (multiplet), and etc. All first-order splitting patterns were assigned on the basis of the appearance of the multiplet. Splitting patterns that could not be easily interpreted are designated as multiplet (m) or broad (br). Carbon nuclear magnetic resonance ( $^{13}\text{C}$  NMR) spectra were recorded on a Bruker AVANCE III HD400 (101 MHz) spectrometer, JEOL ECZ600S (151 MHz) and a JEOL ECZ400S (101 MHz). High resolution mass spectral analysis (HRMS) was performed on Thermo Fisher Scientific Q Exactive Plus Hybrid Quadrupole-Orbitrap Mass Spectrometer. X-ray crystallography analysis was performed on Agilent Super Nova X-ray diffractionmeter. Analytical thin-layer chromatography (TLC) was carried out on WFH-203 F254 pre-coated silica gel plate (0.2 mm thickness). Visualization was performed using a UV lamp or 2,4-Dinitrophenylhydrazine or potassium permanganate stain or phosphomolybdic acid.

## **II. X-Ray Crystallographic Analysis**

Method for single crystals cultivation: a pure solid sample (10–20 mg) was dissolved in dichloromethane/ethyl acetate (1 mL) in a vial at room temperature, and petroleum ether/hexane (1 mL) was added into the above solution slowly while keeping the sample completely dissolved. The vial was properly sealed with parafilm and kept at room temperature to allow the slow evaporation of the solvents until a single crystal was obtained.

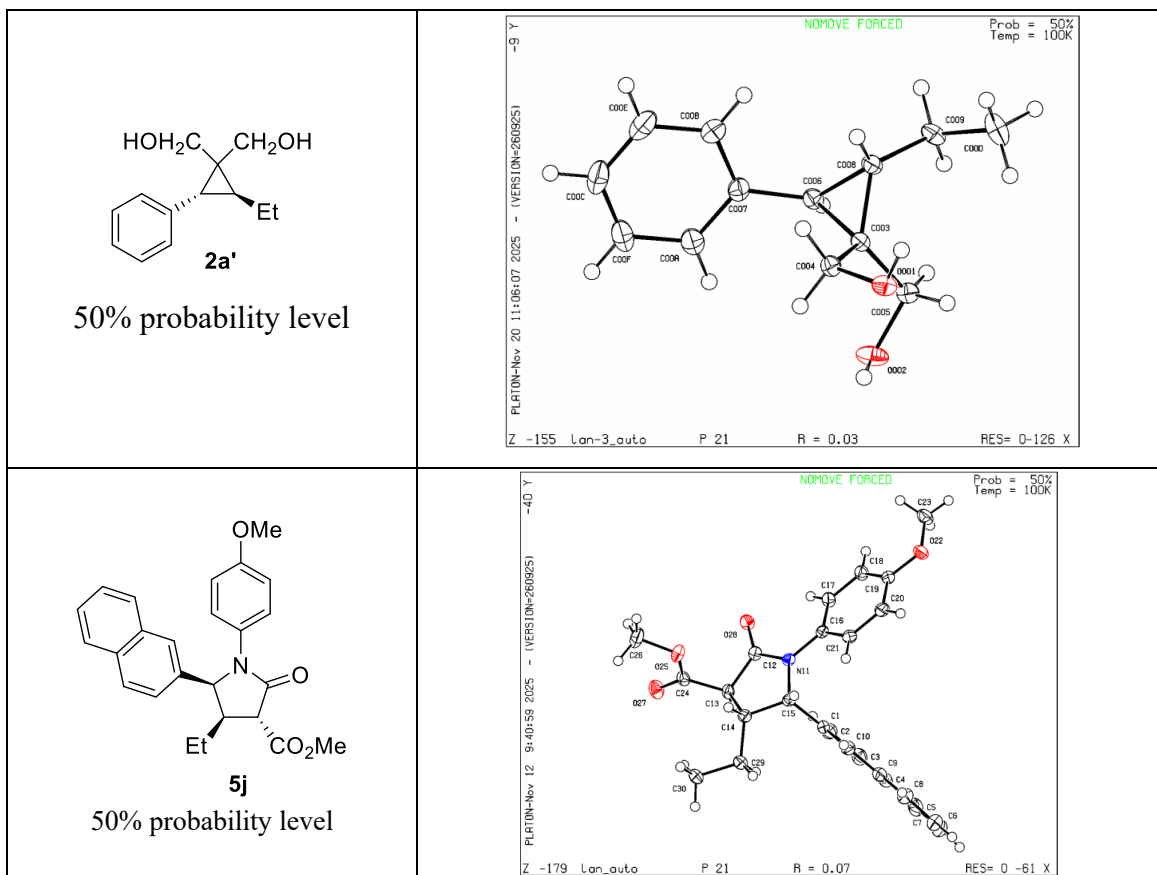

**Table S1: Crystal data and structure refinement for 2a'**

|                       |                                                |
|-----------------------|------------------------------------------------|
| Identification code   | <b>2a'</b>                                     |
| Empirical formula     | C <sub>13</sub> H <sub>18</sub> O <sub>2</sub> |
| Formula weight        | 206.27                                         |
| Temperature/K         | 100(2)                                         |
| Crystal system        | monoclinic                                     |
| Space group           | P2 <sub>1</sub>                                |
| a/Å                   | 9.6463(3)                                      |
| b/Å                   | 5.90560(10)                                    |
| c/Å                   | 10.8390(3)                                     |
| α/°                   | 90                                             |
| β/°                   | 105.744(3)                                     |
| γ/°                   | 90                                             |
| Volume/Å <sup>3</sup> | 594.30(3)                                      |

|                                                |                                                               |
|------------------------------------------------|---------------------------------------------------------------|
| Z                                              | 2                                                             |
| $\rho_{\text{calc}}/\text{cm}^3$               | 1.153                                                         |
| $\mu/\text{mm}^{-1}$                           | 0.602                                                         |
| F(000)                                         | 224.0                                                         |
| Crystal size/ $\text{mm}^3$                    | $0.1 \times 0.1 \times 0.1$                                   |
| Radiation                                      | CuK $\alpha$ ( $\lambda = 1.54184$ )                          |
| 2 $\Theta$ range for data collection/ $^\circ$ | 8.476 to 149.17                                               |
| Index ranges                                   | $-12 \leq h \leq 12, -6 \leq k \leq 7, -13 \leq l \leq 10$    |
| Reflections collected                          | 5222                                                          |
| Independent reflections                        | 2197 [ $R_{\text{int}} = 0.0160, R_{\text{sigma}} = 0.0154$ ] |
| Data/restraints/parameters                     | 2197/1/139                                                    |
| Goodness-of-fit on $F^2$                       | 1.087                                                         |
| Final R indexes [ $I \geq 2\sigma(I)$ ]        | $R1 = 0.0285, wR2 = 0.0771$                                   |
| Final R indexes [all data]                     | $R1 = 0.0286, wR2 = 0.0772$                                   |
| Largest diff. peak/hole / $e \text{ \AA}^{-3}$ | 0.19/-0.14                                                    |
| Flack parameter                                | 0.06(8)                                                       |

**Table S2: Crystal data and structure refinement for 5j**

|                     |                                         |
|---------------------|-----------------------------------------|
| Identification code | <b>5j</b>                               |
| Empirical formula   | $\text{C}_{25}\text{H}_{25}\text{NO}_4$ |
| Formula weight      | 403.46                                  |
| Temperature/K       | 100(2)                                  |
| Crystal system      | monoclinic                              |
| Space group         | $P2_1$                                  |
| a/ $\text{\AA}$     | 8.3579(2)                               |
| b/ $\text{\AA}$     | 11.4992(2)                              |
| c/ $\text{\AA}$     | 10.7787(2)                              |
| $\alpha/^\circ$     | 90                                      |
| $\beta/^\circ$      | 93.485(2)                               |
| $\gamma/^\circ$     | 90                                      |

|                                             |                                                               |
|---------------------------------------------|---------------------------------------------------------------|
| Volume/Å <sup>3</sup>                       | 1034.02(4)                                                    |
| Z                                           | 2                                                             |
| ρ <sub>calc</sub> /cm <sup>3</sup>          | 1.296                                                         |
| μ/mm <sup>-1</sup>                          | 0.707                                                         |
| F(000)                                      | 428.0                                                         |
| Crystal size/mm <sup>3</sup>                | 0.1 × 0.1 × 0.1                                               |
| Radiation                                   | CuKα (λ = 1.54184)                                            |
| 2θ range for data collection/°              | 8.218 to 153.034                                              |
| Index ranges                                | -10 ≤ h ≤ 10, -14 ≤ k ≤ 14, -13 ≤ l ≤ 13                      |
| Reflections collected                       | 22915                                                         |
| Independent reflections                     | 4188 [R <sub>int</sub> = 0.1592, R <sub>sigma</sub> = 0.0644] |
| Data/restraints/parameters                  | 4188/1/275                                                    |
| Goodness-of-fit on F <sup>2</sup>           | 1.064                                                         |
| Final R indexes [I ≥ 2σ (I)]                | R <sub>1</sub> = 0.0696, wR <sub>2</sub> = 0.1850             |
| Final R indexes [all data]                  | R <sub>1</sub> = 0.0703, wR <sub>2</sub> = 0.1855             |
| Largest diff. peak/hole / e Å <sup>-3</sup> | 0.45/-0.37                                                    |
| Flack parameter                             | 0.2(3)                                                        |

### III. Typical Procedures for the Preparation of Substrates

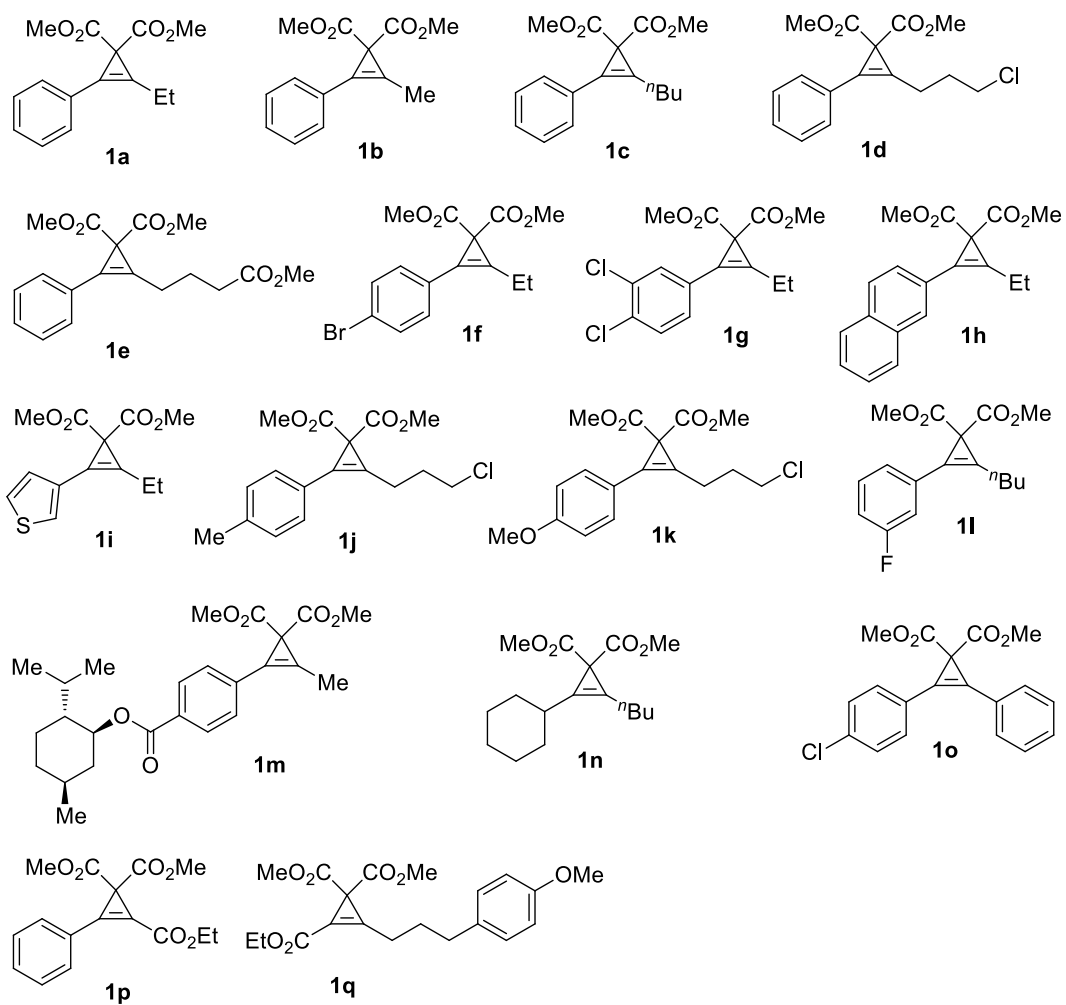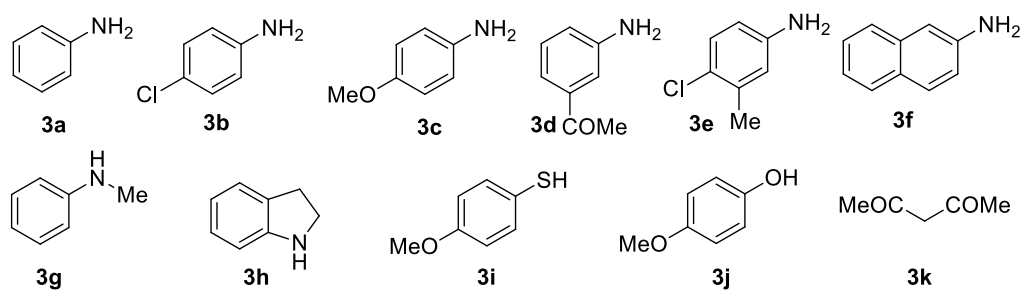

#### 1. Typical procedures for the preparation of substrates 1a–1i, 1l–1n

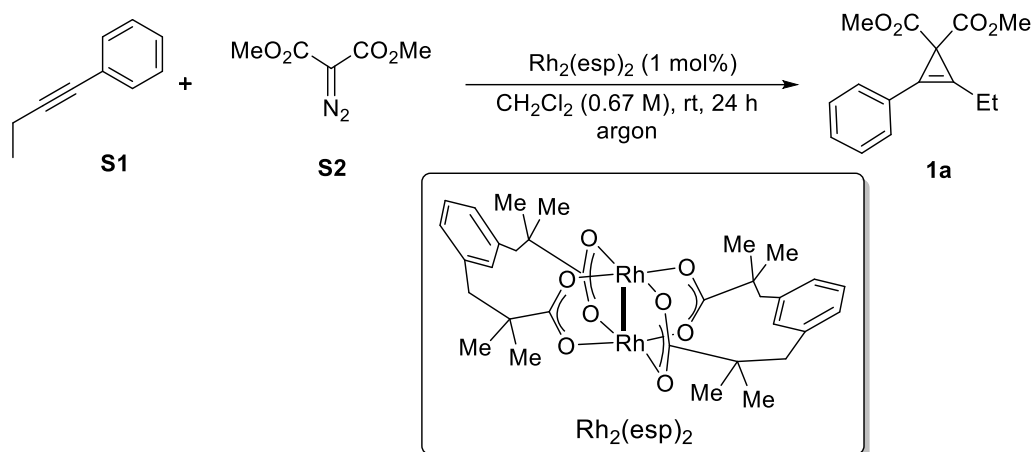

A 100 mL three-necked flask equipped with a stir bar was charged with  $\text{Rh}_2(\text{esp})_2$  (76 mg, 0.1 mmol) in air. The flask was sealed, evacuated, and refilled with argon (three cycles). A solution of alkene **S1** (1.302 g, 10 mmol) in  $\text{CH}_2\text{Cl}_2$  (7 mL) was then added. The resulting mixture was cooled in a water/ice bath for 5 minutes. Subsequently, a solution of diazodimethylmalonate **S2** (2.055 g, 13 mmol) in  $\text{CH}_2\text{Cl}_2$  (8 mL) was added via a syringe pump (0.6 mL/h) at room temperature. After stirring for 24 h, the mixture was quenched with a saturated aqueous thiourea solution (5 mL) and diluted with  $\text{CH}_2\text{Cl}_2$  (25 mL). The mixture was stirred for an additional 30 minutes, transferred to a separatory funnel, and the aqueous layer was extracted with  $\text{CH}_2\text{Cl}_2$  ( $3 \times 25$  mL). The combined organic layers were washed with brine (20 mL), dried over anhydrous  $\text{Na}_2\text{SO}_4$ , filtered, and concentrated under reduced pressure. The residue was purified by flash chromatography on silica gel (petroleum ether/ethyl acetate, v:v = 15:1) to afford the product **1a** (803 mg, 31% yield) as an amorphous white solid.

## 2. Typical procedures for the preparation of substrates **1j**, **1k**, **1o**

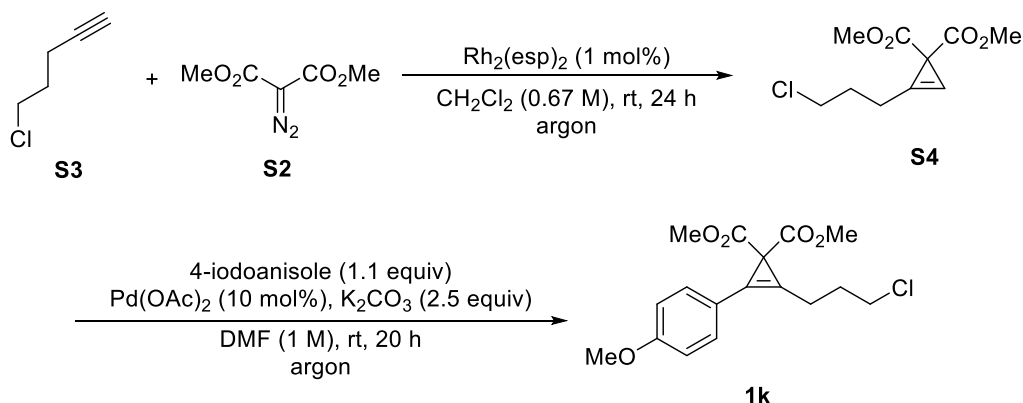

A 100 mL three-necked flask equipped with a stir bar was charged with  $\text{Rh}_2(\text{esp})_2$  (76 mg, 0.1 mmol) in air. The flask was sealed, evacuated, and refilled with argon (three cycles). A solution of alkene **S3** (1.026 g, 10 mmol) in  $\text{CH}_2\text{Cl}_2$  (7 mL) was then added. The resulting mixture was cooled in a water/ice bath for 5 minutes. Subsequently, a solution of diazodimethylmalonate **S2** (2.055 g, 13 mmol) in  $\text{CH}_2\text{Cl}_2$  (8 mL) was added via a syringe pump (0.6 mL/h) at room temperature. After stirring for 24 h, the mixture was quenched with a saturated aqueous thiourea solution (5 mL) and diluted with  $\text{CH}_2\text{Cl}_2$  (25 mL). The mixture was stirred for an additional 30 minutes, transferred to a separatory funnel, and the aqueous layer was extracted with  $\text{CH}_2\text{Cl}_2$  ( $3 \times 25$  mL). The combined organic layers were washed with brine (20 mL), dried over anhydrous  $\text{Na}_2\text{SO}_4$ , filtered, and concentrated under reduced pressure. The residue was purified by flash chromatography on silica gel (petroleum ether/ethyl acetate, v:v = 15:1) to afford the product **S4** (1.877 g, 81% yield) as a colorless oil.

An oven-dried 25 mL Schlenk tube was charged with palladium acetate (224.5 mg, 1.0 mmol), 4-iodoanisole (2.574 g, 11 mmol), **S4** (2.327 g, 10 mmol), and anhydrous potassium carbonate (3.455 g, 25 mmol) under argon atmosphere. *N,N*-dimethylformamide (10 mL) was added, and the mixture was stirred at room temperature. After 20 h, TLC analysis indicated complete consumption of the starting material. The mixture was filtered through a short pad of silica gel (eluted with diethyl ether). The ethereal filtrate was washed sequentially with saturated aqueous ammonium chloride solution, water, and brine. The organic layer was dried over anhydrous  $\text{Na}_2\text{SO}_4$ , filtered, and concentrated under reduced pressure. The crude residue was purified by preparative column chromatography on silica gel (petroleum ether/ethyl acetate, v:v = 3:1,) to afford **1k** (1.097 g, 32% yield) as a yellow oil.

## **2. Substrates 3a–3k are commercially available compounds**

#### IV. Typical Procedures for Asymmetric Transfer Hydrogenation of gem-Diester-substituted Cyclopropenes

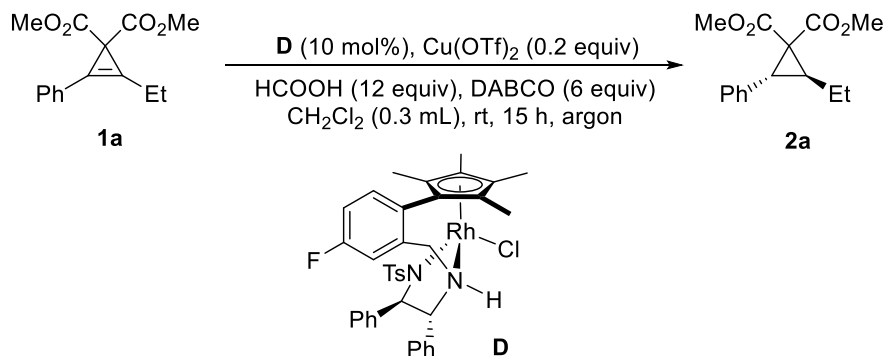

The mixture of HCOOH (45.2  $\mu$ L, 1.2 mmol) and DABCO (67.3 mg, 0.6 mmol) in CH<sub>2</sub>Cl<sub>2</sub> (0.3 mL) was added to **1a** (26.0 mg, 0.1 mmol), Cu(OTf)<sub>2</sub> (7.6 mg, 0.02 mmol) and the catalyst **D** (7.3 mg, 0.01 mmol). After stirring at room temperature for 15 h under argon atmosphere, the reaction mixture was purified by flash chromatography on silica gel (petroleum ether/ethyl acetate, v:v = 20:1) to afford the product **2a** (23.8 mg, 91% yield, 12:1 dr, 99% ee) as a colorless oil.

#### V. Typical Procedures for Asymmetric Ring-Opening of Tetrasubstituted Cyclopropanes with Nucleophiles

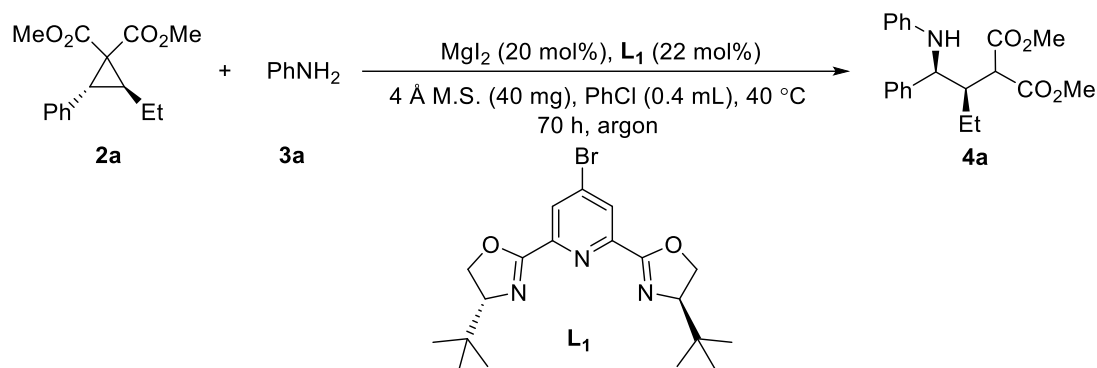

In a nitrogen-filled glovebox, an oven-dried 10 mL sealed tube was charged sequentially with MgI<sub>2</sub> (5.6 mg, 0.02 mmol), ligand **L<sub>1</sub>** (9.8 mg, 0.022 mmol), powdered 4 Å molecular sieves (40 mg), and a magnetic stir bar. PhCl (0.3 mL) was added, and the mixture was stirred inside the glovebox for 1 h to yield a yellow suspension. Separately, the mixture of **2a** (26.2 mg, 0.1 mmol, 99% ee) and **3a** (11.9  $\mu$ L, 0.12 mmol) in PhCl (0.1 mL) was added. The tube was then sealed, removed from the glovebox, and stirred at 40 °C until TLC analysis (about 70 h) indicated complete

consumption of the cyclopropane **2a**. The mixture was then directly filtered under positive air pressure through a 2 cm silica gel plug, eluting with ethyl acetate (50 mL). The filtrate was concentrated under reduced pressure, and the residue was purified by flash chromatography on silica gel (petroleum ether/ethyl acetate, v:v = 10:1) to afford the product **4a** (30.5 mg, 86% yield, >20:1 dr, 99% ee) as a colorless oil.

## VI. Typical Procedure for the Asymmetric Ring-Closing Reaction of **4a**

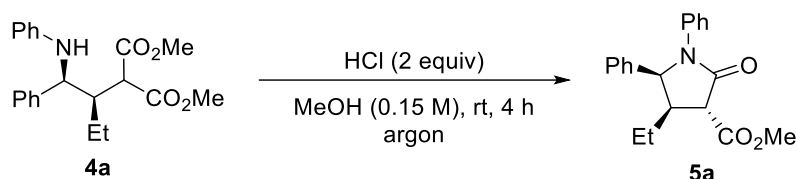

HCl (2 M, 0.1 mL, 0.2 mmol) was added to **4a** (35.5 mg, 0.1 mmol) in MeOH (0.67 mL) under argon atmosphere. After stirred at room temperature for 4 h, the reaction was quenched with aqueous NaHCO<sub>3</sub> solution and extracted with CH<sub>2</sub>Cl<sub>2</sub> (3×10 mL). The combined organic layer was dried over anhydrous Na<sub>2</sub>SO<sub>4</sub>, filtered and evaporated under reduced pressure. The residue was purified by flash chromatography (petroleum ether/ethyl acetate, v:v = 5:1) to afford product **5a** (29.3 mg, 91% yield, >20:1 dr, 99% ee) as a amorphous white solid.

## VII. Typical procedure of the synthesis of compound **2a'**

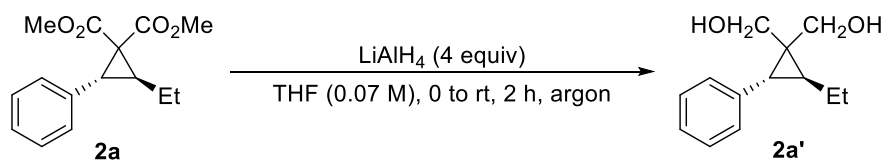

A solution of diester **2a** (78.7 mg, 0.3 mmol) in THF (4.5 mL) was cooled to 0 °C in an ice bath. Lithium aluminum hydride (LiAlH<sub>4</sub>, 45.5 mg, 12 mmol) was added in several small portions. The mixture was then allowed to warm gradually to room temperature and stirred for 2 h, at which point TLC analysis indicated complete consumption of the starting material. The reaction was carefully quenched by sequential addition of water (5 mL) and HCl (5 mL, 2 M). The resulting mixture was transferred to a separatory funnel, the layers were separated, and the aqueous layer was extracted with CH<sub>2</sub>Cl<sub>2</sub> (3 × 10 mL). The combined organic extracts were washed with brine, dried over anhydrous Na<sub>2</sub>SO<sub>4</sub>, filtered, and concentrated under reduced

pressure. The residue was purified by flash chromatography (petroleum ether/ethyl acetate, v:v = 1:1) to afford product **2a'** (59.0 mg, 95% yield, >20:1 dr, 99% ee) as a amorphous white solid.

### VIII. Characterizations of New Compounds

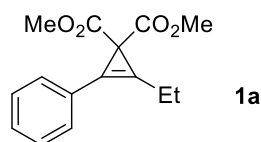

#### Dimethyl 2-ethyl-3-phenylcycloprop-2-ene-1,1-dicarboxylate (**1a**):

Purified by flash chromatography on silica gel (petroleum ether/ethyl acetate, v:v = 15:1), amorphous white solid, mp 45–47 °C, 803 mg, 31% yield. <sup>1</sup>H NMR (400 MHz, CDCl<sub>3</sub>) δ 7.54–7.52 (m, 2H), 7.42–7.34 (m, 3H), 3.71 (s, 6H), 2.74 (q, *J* = 7.5 Hz, 2H), 1.35 (t, *J* = 7.5 Hz, 3H). <sup>13</sup>C NMR (101 MHz, CDCl<sub>3</sub>) δ 171.6, 129.7, 129.5, 128.9, 125.1, 110.2, 104.3, 52.3, 35.1, 18.3, 11.9. HRMS (ESI-Quadrupole-Orbitrap) *m/z*: [M + Na]<sup>+</sup> Calcd for C<sub>15</sub>H<sub>16</sub>O<sub>4</sub>Na 283.0941; Found 283.0937. IR (KBr thin film, cm<sup>-1</sup>): ν 2953, 1722, 1597, 1434, 1232, 1059, 974, 761, 691, 554.

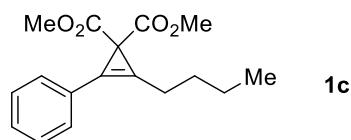

#### Dimethyl 2-butyl-3-phenylcycloprop-2-ene-1,1-dicarboxylate (**1c**):

Purified by flash chromatography on silica gel (petroleum ether/ethyl acetate, v:v = 10:1), yellow oil, 346 mg, 12% yield. <sup>1</sup>H NMR (400 MHz, CDCl<sub>3</sub>) δ 7.51 (d, *J* = 7.2 Hz, 2H), 7.42–7.33 (m, 3H), 3.70 (s, 6H), 2.71 (t, *J* = 7.4 Hz, 2H), 1.78–1.70 (m, 2H), 1.50–1.41 (m, 2H), 0.96 (t, *J* = 7.4 Hz, 3H). <sup>13</sup>C NMR (101 MHz, CDCl<sub>3</sub>) δ 171.6, 129.7, 129.4, 128.9, 125.1, 109.3, 104.4, 52.2, 35.1, 29.3, 24.3, 22.5, 13.8. HRMS (ESI-Quadrupole-Orbitrap) *m/z*: [M + Na]<sup>+</sup> Calcd for C<sub>17</sub>H<sub>20</sub>O<sub>4</sub>Na 311.1254; Found 311.1248. IR (KBr thin film, cm<sup>-1</sup>): ν 2954, 2872, 1724, 1490, 1434, 1235, 1059, 974, 759, 690.

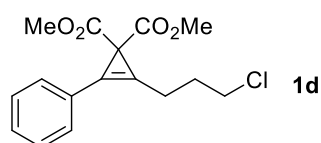

**Dimethyl 2-(3-chloropropyl)-3-phenylcycloprop-2-ene-1,1-dicarboxylate (1d):**

Purified by flash chromatography on silica gel (petroleum ether/ethyl acetate, v:v = 10:1), yellow oil, 570 mg, 18% yield. <sup>1</sup>H NMR (400 MHz, CDCl<sub>3</sub>) δ 7.54–7.52 (m, 2H), 7.46–7.36 (m, 3H), 3.72 (s, 6H), 3.66 (t, *J* = 6.3 Hz, 2H), 2.93 (t, *J* = 7.1 Hz, 2H), 2.26–2.15 (m, 2H). <sup>13</sup>C NMR (101 MHz, CDCl<sub>3</sub>) δ 171.4, 129.8, 129.1, 124.8, 107.4, 105.9, 52.4, 44.0, 35.1, 30.00, 21.9. HRMS (ESI-Quadrupole-Orbitrap) *m/z*: [M + Na]<sup>+</sup> Calcd for C<sub>16</sub>H<sub>17</sub>O<sub>4</sub>ClNa 331.0708 (100.0%), 333.0678 (32.0%); Found 331.0701 (100.0%), 333.0674 (32.0%). IR (KBr thin film, cm<sup>-1</sup>): ν 2952, 1720, 1434, 1235, 1059, 971, 836, 761, 690, 653.

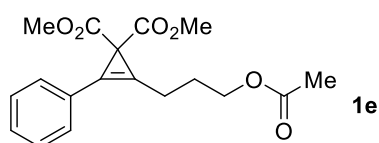**Dimethyl 2-(3-acetoxypentyl)-3-phenylcycloprop-2-ene-1,1-dicarboxylate (1e):**

Purified by flash chromatography on silica gel (petroleum ether/ethyl acetate, v:v = 10:1), yellow oil, 337 mg, 10% yield. <sup>1</sup>H NMR (400 MHz, CDCl<sub>3</sub>) δ 7.53 (d, *J* = 7.0 Hz, 2H), 7.48–7.35 (m, 3H), 4.18 (t, *J* = 6.3 Hz, 2H), 3.72 (s, 6H), 2.82 (t, *J* = 7.4 Hz, 2H), 2.14–2.07 (m, 2H), 2.05 (s, 3H). <sup>13</sup>C NMR (151 MHz, CDCl<sub>3</sub>) δ 171.5, 171.2, 129.82, 129.76, 129.0, 124.8, 107.9, 105.5, 63.6, 52.4, 35.1, 26.5, 21.5, 21.1. HRMS (ESI-Quadrupole-Orbitrap) *m/z*: [M + Na]<sup>+</sup> Calcd for C<sub>18</sub>H<sub>20</sub>O<sub>6</sub>Na; 355.1152 Found 355.1150. IR (KBr thin film, cm<sup>-1</sup>): ν 2955, 1728, 1598, 1435, 1233, 1062, 917, 758, 692, 535.

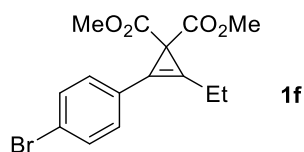**Dimethyl 2-(4-bromophenyl)-3-ethylcycloprop-2-ene-1,1-dicarboxylate (1f):**

Purified by flash chromatography on silica gel (petroleum ether/ethyl acetate, v:v = 10:1), yellow oil, 503 mg, 15% yield. <sup>1</sup>H NMR (400 MHz, CDCl<sub>3</sub>) δ 7.55–7.53(m, 2H), 7.40–7.38 (m, 2H), 3.71 (s, 6H), 2.73 (q, *J* = 7.3 Hz, 2H), 1.34 (t, *J* = 7.5 Hz, 3H). <sup>13</sup>C NMR (101 MHz, CDCl<sub>3</sub>) δ 171.4, 132.2, 131.2, 124.1, 123.8, 111.3, 103.6, 52.4, 35.1, 18.4, 11.8. HRMS (ESI-Quadrupole-Orbitrap) *m/z*: [M + Na]<sup>+</sup> Calcd for

C<sub>15</sub>H<sub>15</sub>O<sub>4</sub>BrNa 361.0046 (100.0%), 363.0025 (97.3%); Found 361.0043 (100.0%), 363.0022 (97.3%).. IR (KBr thin film, cm<sup>-1</sup>): ν 2951, 1720, 1585, 1434, 1233, 1058, 973, 827, 762, 692, 558.

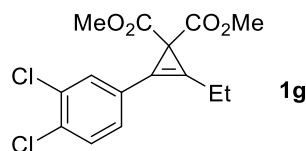

**Dimethyl 2-(3,4-dichlorophenyl)-3-ethylcycloprop-2-ene-1,1-dicarboxylate (1g):**

Purified by flash chromatography on silica gel (petroleum ether/ethyl acetate, v:v = 10:1), amorphous white solid, mp 37–40 °C, 720 mg, 22% yield. <sup>1</sup>H NMR (400 MHz, CDCl<sub>3</sub>) δ 7.59 (s, 1H), 7.47 (d, *J* = 8.3 Hz, 1H), 7.35 (d, *J* = 8.3 Hz, 1H), 3.72 (s, 6H), 2.74 (q, *J* = 7.5 Hz, 2H), 1.34 (t, *J* = 7.5 Hz, 3H). <sup>13</sup>C NMR (101 MHz, CDCl<sub>3</sub>) δ 171.1, 133.7, 133.3, 131.2, 131.0, 128.7, 125.2, 112.7, 102.8, 52.5, 35.2, 18.3, 11.8. HRMS (ESI-Quadrupole-Orbitrap) m/z: [M + Na]<sup>+</sup> Calcd for C<sub>15</sub>H<sub>14</sub>O<sub>4</sub>Cl<sub>2</sub>Na 351.0161 (100.0%), 353.0132 (63.9%); Found 351.0160 (100.0%), 353.0134 (63.9%).. IR (KBr thin film, cm<sup>-1</sup>): ν 2953, 1884, 1719, 1464, 1381, 1243, 1028, 976, 822, 696.

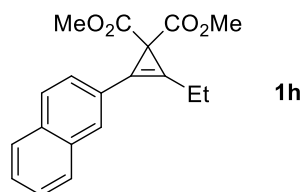

**Dimethyl 2-ethyl-3-(naphthalen-2-yl)cycloprop-2-ene-1,1-dicarboxylate (1h):**

Purified by flash chromatography on silica gel (petroleum ether/ethyl acetate, v:v = 10:1), amorphous white solid, mp 83–86 °C, 819 mg, 26% yield. <sup>1</sup>H NMR (400 MHz, CDCl<sub>3</sub>) δ 7.96 (s, 1H), 7.87–7.82 (m, 3H), 7.64 (dd, *J* = 8.5, 1.6 Hz, 1H), 7.53–7.49 (m, 2H), 3.73 (s, 6H), 2.81 (q, *J* = 7.5 Hz, 2H), 1.40 (t, *J* = 7.5 Hz, 3H). <sup>13</sup>C NMR (151 MHz, CDCl<sub>3</sub>) δ 171.6, 133.6, 133.3, 129.6, 128.7, 128.5, 127.9, 127.2, 126.8, 126.5, 122.4, 110.7, 104.5, 52.3, 35.3, 18.4, 11.9. HRMS (ESI-Quadrupole-Orbitrap) m/z: [M + Na]<sup>+</sup> Calcd for C<sub>19</sub>H<sub>18</sub>O<sub>4</sub>Na 333.1097; Found 333.1092. IR (KBr thin film, cm<sup>-1</sup>): ν 2951, 2855, 1724, 1434, 1244, 935, 824, 746, 659, 479.

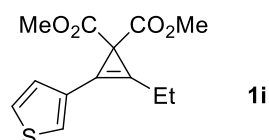

**Dimethyl 2-ethyl-3-(thiophen-3-yl)cycloprop-2-ene-1,1-dicarboxylate (1i):**

Purified by flash chromatography on silica gel (petroleum ether/ethyl acetate, v:v = 10:1), yellow oil, 93.0 mg, 3% yield. <sup>1</sup>H NMR (400 MHz, CDCl<sub>3</sub>) δ 7.50 (dd, *J* = 2.9, 1.0 Hz, 1H), 7.35 (dd, *J* = 5.0, 3.0 Hz, 1H), 7.25 (dd, *J* = 5.1, 1.2 Hz, 1H), 3.71 (s, 6H), 2.69 (q, *J* = 7.5 Hz, 2H), 1.32 (t, *J* = 7.5 Hz, 3H). <sup>13</sup>C NMR (101 MHz, CDCl<sub>3</sub>) δ 171.6, 128.1, 127.6, 126.8, 126.0, 107.6, 99.6, 52.3, 35.2, 18.1, 11.7. HRMS (ESI-Quadrupole-Orbitrap) *m/z*: [M + Na]<sup>+</sup> Calcd for C<sub>13</sub>H<sub>14</sub>O<sub>4</sub>NaS Calculated 289.0505; Found 289.0500. IR (KBr thin film, cm<sup>-1</sup>): ν 2954, 1729, 1435, 1264, 1062, 733, 703, 634, 448, 419.

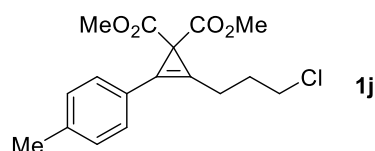**Dimethyl 2-(3-chloropropyl)-3-(p-tolyl)cycloprop-2-ene-1,1-dicarboxylate (1j):**

Purified by flash chromatography on silica gel (petroleum ether/ethyl acetate, v:v = 10:1), yellow oil, 680 mg, 21% yield. <sup>1</sup>H NMR (400 MHz, CDCl<sub>3</sub>) δ 7.44 (d, *J* = 8.0 Hz, 2H), 7.28–7.24 (m, 2H), 3.73 (s, 6H), 3.67 (t, *J* = 6.3 Hz, 2H), 2.93 (t, *J* = 7.1 Hz, 2H), 2.40 (s, 3H), 2.26–2.19 (m, 2H). <sup>13</sup>C NMR (151 MHz, CDCl<sub>3</sub>) δ 171.5, 140.2, 129.8, 121.9, 106.1, 105.8, 52.4, 44.0, 35.0, 30.1, 21.9, 21.7. HRMS (ESI-Quadrupole-Orbitrap) *m/z*: [M + Na]<sup>+</sup> Calcd for C<sub>17</sub>H<sub>19</sub>O<sub>4</sub>ClNa 345.0864 (100.0%), 347.0835 (32.0%); Found 345.0858 (100.0%), 347.0830 (32.0%). IR (KBr thin film, cm<sup>-1</sup>): ν 2952, 1722, 1434, 1236, 1060, 971, 818, 727, 651, 596.

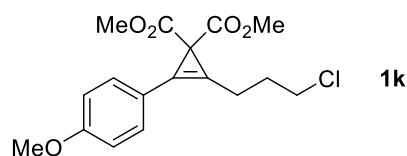**Dimethyl 2-(3-chloropropyl)-3-(4-methoxyphenyl)cycloprop-2-ene-1,1-dicarboxylate (1k):**

Purified by flash chromatography on silica gel (petroleum ether/ethyl acetate, v:v = 3:1), yellow oil, 1.04 g, 31% yield. <sup>1</sup>H NMR (400 MHz, CDCl<sub>3</sub>) δ 7.46 (d, *J* = 8.3 Hz, 2H), 6.94 (d, *J* = 8.3 Hz, 2H), 3.83 (s, 3H), 3.70 (s, 6H), 3.65 (t, *J* = 6.3 Hz, 2H), 2.89 (t, *J* = 7.0 Hz, 2H), 2.22–2.15 (m, 2H). <sup>13</sup>C NMR (101 MHz, CDCl<sub>3</sub>) δ 171.6, 160.8,

131.4, 117.2, 114.6, 105.4, 104.5, 55.5, 52.4, 44.0, 35.0, 30.1, 21.8. HRMS (ESI-Quadrupole-Orbitrap)  $m/z$ :  $[M + H]^+$  Calcd for  $C_{17}H_{20}O_5Cl$  339.0994 (100.0%), 341.0964 (32.0%); Found 339.0998 (100.0%), 341.0970 (32.0%). IR (KBr thin film,  $cm^{-1}$ ):  $\nu$  2923, 2850, 1723, 1604, 1241, 1061, 970, 834, 646, 526.

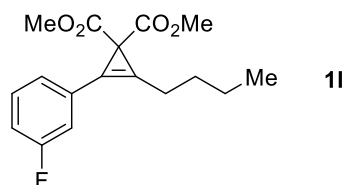

**Dimethyl 2-butyl-3-(3-fluorophenyl)cycloprop-2-ene-1,1-dicarboxylate (1l):**

Purified by flash chromatography on silica gel (petroleum ether/ethyl acetate, v:v = 10:1), yellow oil, 962 mg, 31% yield.  $^1H$  NMR (400 MHz,  $CDCl_3$ )  $\delta$  7.35–7.30 (m, 1H), 7.26–7.24 (m, 1H), 7.17–7.15 (m, 1H), 7.03–6.98 (m, 1H), 3.66 (s, 6H), 2.67 (t,  $J = 7.4$  Hz, 2H), 1.72–1.65 (m, 2H), 1.44–1.35 (m, 2H), 0.91 (t,  $J = 7.4$  Hz, 3H).  $^{13}C$  NMR (101 MHz,  $CDCl_3$ )  $\delta$  171.2, 162.8 (C-F,  $^1J_{C-F} = 248.5$  Hz), 130.5 (C-F,  $^3J_{C-F} = 9.1$  Hz), 127.1 (C-F,  $^3J_{C-F} = 8.1$  Hz), 125.3 (C-F,  $^4J_{C-F} = 2.0$  Hz), 116.4 (C-F,  $^2J_{C-F} = 22.2$  Hz), 116.2 (C-F,  $^2J_{C-F} = 22.2$  Hz), 110.9, 103.6 (C-F,  $^4J_{C-F} = 3.0$  Hz), 52.2, 35.1, 29.1, 24.2, 22.4, 13.7.  $^{19}F$  NMR (376 MHz,  $CDCl_3$ )  $\delta$  -112.2. HRMS (ESI-Quadrupole-Orbitrap)  $m/z$ :  $[M + Na]^+$  Calcd for  $C_{17}H_{19}O_4FNa$  329.1160; Found 329.1158. IR (KBr thin film,  $cm^{-1}$ ):  $\nu$  2955, 2872, 1724, 1583, 1267, 1238, 1060, 870, 787, 633.

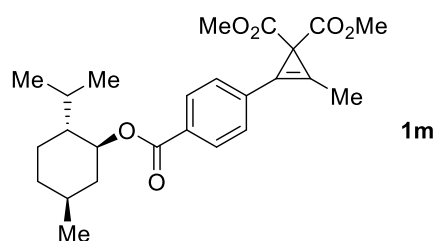

**Dimethyl 2-(4-(((1S,2R,5S)-2-isopropyl-5-methylcyclohexyl)oxy)carbonyl)phenyl)-3-methylcycloprop-2-ene-1,1-dicarboxylate (1m):**

Purified by flash chromatography on silica gel (petroleum ether/ethyl acetate, v:v = 10:1), amorphous white solid, mp 76–79 °C, 619 mg, 14% yield.  $^1H$  NMR (400 MHz,  $CDCl_3$ )  $\delta$  8.07 (d,  $J = 8.3$  Hz, 2H), 7.58 (d,  $J = 8.3$  Hz, 2H), 4.93 (td,  $J = 10.9, 4.3$  Hz, 1H), 3.72 (s, 6H), 2.40 (s, 3H), 2.13–2.10 (m, 1H), 1.92 (dq,  $J = 6.9, 4.4$  Hz, 1H), 1.74

-1.72 (m, 2H), 1.60–1.52 (m, 2H), 1.18–1.06 (m, 2H), 0.92 (t,  $J = 7.3$  Hz, 7H), 0.78 (d,  $J = 7.0$  Hz, 3H).  $^{13}\text{C}$  NMR (101 MHz,  $\text{CDCl}_3$ )  $\delta$  171.1, 165.6, 131.4, 130.1, 129.5, 129.2, 108.3, 104.5, 75.3, 52.4, 47.4, 41.1, 35.2, 34.4, 31.6, 26.7, 23.8, 22.2, 20.9, 16.7, 9.9. HRMS (ESI-Quadrupole-Orbitrap)  $m/z$ :  $[\text{M} + \text{Na}]^+$  Calcd for  $\text{C}_{25}\text{H}_{36}\text{O}_6\text{Na}$  451.2091; Found 451.2090.  $[\alpha]_{\text{D}}^{19}$ :  $-24.9$  (c 0.3,  $\text{CHCl}_3$ ); IR (KBr thin film,  $\text{cm}^{-1}$ ):  $\nu$  2955, 2873, 1743, 1708, 1606, 1439, 1270, 955, 788, 695.

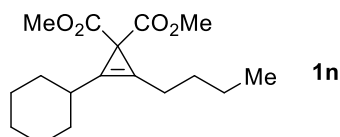

**Dimethyl 2-butyl-3-cyclohexylcycloprop-2-ene-1,1-dicarboxylate (1n):**

Purified by flash chromatography on silica gel (petroleum ether/ethyl acetate, v:v = 10:1), yellow oil, 362 mg, 12% yield.  $^1\text{H}$  NMR (400 MHz,  $\text{CDCl}_3$ )  $\delta$  3.67 (s, 6H), 2.53 (s, 1H), 2.43 (t,  $J = 7.4$  Hz, 2H), 1.86–1.83 (m, 2H), 1.68–1.66 (m, 2H), 1.60–1.50 (m, 3H), 1.39–1.22 (m, 7H), 0.89 (t,  $J = 7.3$  Hz, 3H).  $^{13}\text{C}$  NMR (101 MHz,  $\text{CDCl}_3$ )  $\delta$  172.6, 108.8, 104.5, 52.0, 34.8, 33.8, 30.5, 29.1, 26.0, 25.4, 23.4, 22.4, 13.8. HRMS (ESI-Quadrupole-Orbitrap)  $m/z$ :  $[\text{M} + \text{Na}]^+$  Calcd for  $\text{C}_{17}\text{H}_{26}\text{O}_4\text{Na}$  317.1723; Found 317.1721. IR (KBr thin film,  $\text{cm}^{-1}$ ):  $\nu$  2929, 2855, 1722, 1433, 1228, 1187, 1060, 978, 838, 738.

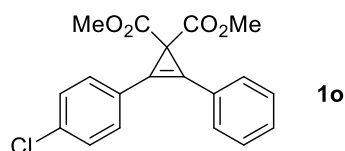

**Dimethyl 2-(4-chlorophenyl)-3-phenylcycloprop-2-ene-1,1-dicarboxylate (1o):**

Purified by flash chromatography on silica gel (petroleum ether/ethyl acetate, v:v = 10:1), amorphous white solid, mp 70–73 °C, 1.20 g, 35% yield.  $^1\text{H}$  NMR (400 MHz,  $\text{CDCl}_3$ )  $\delta$  7.73 (d,  $J = 7.4$  Hz, 2H), 7.67 (d,  $J = 8.3$  Hz, 2H), 7.52–7.45 (m, 5H), 3.73 (s, 6H).  $^{13}\text{C}$  NMR (101 MHz,  $\text{CDCl}_3$ )  $\delta$  170.7, 136.2, 131.4, 130.39, 130.35, 129.5, 129.2, 125.1, 124.0, 107.3, 105.6, 52.61, 35.09. HRMS (ESI-Quadrupole-Orbitrap)  $m/z$ :  $[\text{M} + \text{Na}]^+$  Calcd for  $\text{C}_{19}\text{H}_{15}\text{O}_4\text{ClNa}$  365.0551 (100.0%), 367.0522 (32.0%); Found 365.0552 (100.0%), 367.0523 (32.0%). IR (KBr thin film,  $\text{cm}^{-1}$ ):  $\nu$  2951, 1879, 1716, 1611, 1512, 1239, 1033, 977, 760, 698.

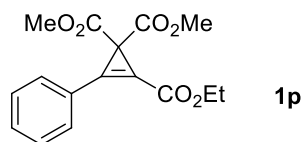

**2-ethyl 1,1-dimethyl 3-phenylcycloprop-2-ene-1,1,2-tricarboxylate (1p):**

Purified by flash chromatography on silica gel (petroleum ether/ethyl acetate, v:v = 10:1), amorphous white solid, mp 107–110 °C, 1.67 g, 55% yield. <sup>1</sup>H NMR (400 MHz, CDCl<sub>3</sub>) δ 7.82–7.79 (m, 2H), 7.56–7.47 (m, 3H), 4.39 (q, *J* = 7.2 Hz, 2H), 3.75 (s, 6H), 1.40 (t, *J* = 7.2 Hz, 3H). <sup>13</sup>C NMR (151 MHz, CDCl<sub>3</sub>) δ 169.1, 157.7, 132.7, 132.3, 129.3, 123.1, 120.1, 98.7, 62.3, 52.9, 36.5, 14.4. HRMS (ESI-Quadrupole-Orbitrap) *m/z*: [M + Na]<sup>+</sup> Calcd for C<sub>16</sub>H<sub>16</sub>O<sub>6</sub>Na 327.0839; Found 327.0843. IR (KBr thin film, cm<sup>-1</sup>): ν 2952, 1862, 1755, 1432, 1282, 1189, 1034, 851, 780, 692.

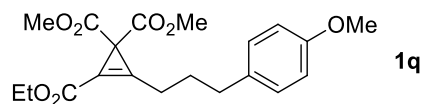

**2-ethyl 1,1-dimethyl 3-(3-(4-methoxyphenyl)propyl)cycloprop-2-ene-1,1,2-tricarboxylate (1q):**

Purified by flash chromatography on silica gel (petroleum ether/ethyl acetate, v:v = 10:1), yellow oil, 2.59 g, 69% yield. <sup>1</sup>H NMR (400 MHz, CDCl<sub>3</sub>) δ 7.08 (d, *J* = 8.5 Hz, 2H), 6.80 (d, *J* = 8.5 Hz, 2H), 4.28 (q, *J* = 7.1 Hz, 2H), 3.75 (s, 3H), 3.71 (s, 6H), 2.66 (t, *J* = 7.3 Hz, 4H), 2.01–1.93 (m, 2H), 1.30 (t, *J* = 7.1 Hz, 3H). <sup>13</sup>C NMR (101 MHz, CDCl<sub>3</sub>) δ 169.4, 157.9, 157.2, 133.0, 129.4, 124.1, 113.8, 98.9, 62.1, 55.2, 52.5, 36.2, 33.8, 28.1, 24.3, 14.1. HRMS (ESI-Quadrupole-Orbitrap) *m/z*: [M + Na]<sup>+</sup> Calcd for C<sub>20</sub>H<sub>24</sub>O<sub>7</sub>Na 399.1414; Found 399.1410. IR (KBr thin film, cm<sup>-1</sup>): ν 2951, 1716, 1611, 1512, 1435, 1239, 1062, 833, 760, 518.

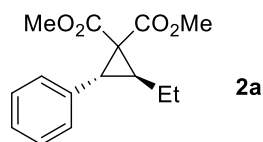

**Dimethyl (2*S*,3*R*)-2-ethyl-3-phenylcyclopropane-1,1-dicarboxylate (2a):**

Purified by flash chromatography on silica gel (petroleum ether/ethyl acetate, v:v = 20:1), yellow oil, 23.8 mg, 91% yield, 12:1 dr. <sup>1</sup>H NMR (400 MHz, CDCl<sub>3</sub>) δ 7.28–7.24 (m, 2H), 7.22–7.18 (m, 3H), 3.79 (s, 3H), 3.38 (s, 3H), 3.09 (d, *J* = 8.2 Hz, 1H),

2.49 (dd,  $J = 15.3, 7.6$  Hz, 1H), 1.64–1.49 (m, 2H), 1.07 (t,  $J = 7.4$  Hz, 3H).  $^{13}\text{C}$  NMR (101 MHz,  $\text{CDCl}_3$ )  $\delta$  168.7, 167.8, 135.4, 128.7, 128.2, 127.3, 52.8, 52.4, 42.9, 37.2, 32.8, 21.1, 13.3. HRMS (ESI-Quadrupole-Orbitrap)  $m/z$ :  $[\text{M} + \text{Na}]^+$  Calcd for  $\text{C}_{15}\text{H}_{18}\text{O}_4\text{Na}$  285.1097; Found 285.1098.  $[\alpha]_{\text{D}}^{21}$ : +43.5 (c 0.4,  $\text{CHCl}_3$ ); HPLC analysis: 99% ee (Chiralcel ODH, 0.2:99.8  $i$ PrOH/hexanes, 1 mL/min, 220 nm),  $R_t$  (major) = 19.8 min,  $R_t$  (minor) = 17.3 min. IR (KBr thin film,  $\text{cm}^{-1}$ ):  $\nu$  2954, 1724, 1603, 1434, 1294, 1244, 1145, 922, 802, 697.

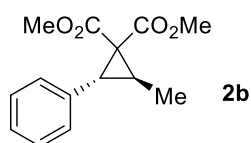

**Dimethyl (2*S*,3*R*)-2-methyl-3-phenylcyclopropane-1,1-dicarboxylate (2b):**

Purified by flash chromatography on silica gel (petroleum ether/ethyl acetate, v:v = 20:1), yellow oil, 22.5 mg, 91% yield, 7:1 dr.  $^1\text{H}$  NMR (400 MHz,  $\text{CDCl}_3$ )  $\delta$  7.26–7.24 (m, 2H), 7.22–7.18 (m, 3H), 3.80 (s, 3H), 3.38 (s, 3H), 3.06 (d,  $J = 8.1$  Hz, 1H), 2.60–2.53 (m, 1H), 1.27 (d,  $J = 6.3$  Hz, 3H).  $^{13}\text{C}$  NMR (101 MHz,  $\text{CDCl}_3$ )  $\delta$  168.6, 167.7, 135.3, 128.6, 128.3, 127.3, 52.8, 52.4, 43.3, 38.0, 25.4, 12.6. HRMS (ESI-Quadrupole-Orbitrap)  $m/z$ :  $[\text{M} + \text{Na}]^+$  Calcd for  $\text{C}_{14}\text{H}_{16}\text{O}_4\text{Na}$  271.0941; Found 271.0940.  $[\alpha]_{\text{D}}^{21}$ : +57.1 (c 0.3,  $\text{CHCl}_3$ ); HPLC analysis: 99% ee (Chiralpak IG, 0.8:99.2  $i$ PrOH/hexanes, 1 mL/min, 220 nm),  $R_t$  (major) = 16.8 min,  $R_t$  (minor) = 21.0 min. IR (KBr thin film,  $\text{cm}^{-1}$ ):  $\nu$  2953, 1724, 1646, 1435, 1292, 1140, 904, 741, 697, 545.

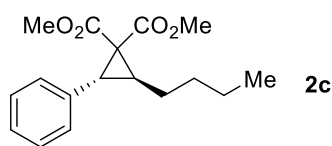

**Dimethyl (2*S*,3*R*)-2-butyl-3-phenylcyclopropane-1,1-dicarboxylate (2c):**

Purified by flash chromatography on silica gel (petroleum ether/ethyl acetate, v:v = 10:1), yellow oil, 27.4 mg, 94% yield, 5:1 dr.  $^1\text{H}$  NMR (400 MHz,  $\text{CDCl}_3$ )  $\delta$  7.28–7.18 (m, 5H), 3.79 (s, 3H), 3.38 (s, 3H), 3.08 (d,  $J = 8.2$  Hz, 1H), 2.50 (d,  $J = 14.1, 7.0$  Hz, 1H), 1.60–1.56 (m, 1H), 1.49–1.36 (m, 5H), 0.91 (t,  $J = 7.0$  Hz, 3H).  $^{13}\text{C}$  NMR (101 MHz,  $\text{CDCl}_3$ )  $\delta$  168.8, 167.8, 135.4, 128.7, 128.3, 127.3, 52.8, 52.4, 42.9, 37.3,

31.21, 31.18, 27.3, 22.4, 14.2. HRMS (ESI-Quadrupole-Orbitrap)  $m/z$ :  $[M + Na]^+$  Calcd for  $C_{17}H_{22}O_4Na$  313.1410; Found 313.1408.  $[\alpha]_D^{22}$ : +16.4 (c 1.3,  $CHCl_3$ ); HPLC analysis: 99% ee (Chiralcel OD-H, 0.1:99.9  $i$ PrOH/hexanes, 1 mL/min, 220 nm),  $R_t$  (major) = 30.6 min,  $R_t$  (minor) = 24.0 min. IR (KBr thin film,  $cm^{-1}$ ):  $\nu$  2953, 1724, 1604, 1434, 1320, 1227, 1079, 908, 697, 585.

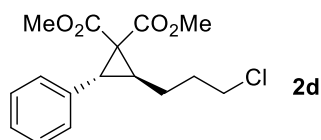

**Dimethyl (2*S*,3*R*)-2-(3-chloropropyl)-3-phenylcyclopropane-1,1-dicarboxylate (2d):**

Purified by flash chromatography on silica gel (petroleum ether/ethyl acetate, v:v = 20:1), yellow oil, 23.3 mg, 75% yield, 8:1 dr.  $^1H$  NMR (400 MHz,  $CDCl_3$ )  $\delta$  7.26–7.22 (m, 3H), 7.18 (d,  $J = 7.2$  Hz, 2H), 3.81 (s, 3H), 3.60 (t,  $J = 6.3$  Hz, 2H), 3.39 (s, 3H), 3.12 (d,  $J = 8.1$  Hz, 1H), 2.51 (dd,  $J = 15.1$  Hz, 7.5 Hz, 1H), 2.00–1.92 (m, 2H), 1.75–1.69 (m, 2H).  $^{13}C$  NMR (101 MHz,  $CDCl_3$ )  $\delta$  168.5, 167.5, 134.9, 128.6, 128.4, 127.5, 53.0, 52.5, 44.4, 42.9, 37.0, 31.9, 30.1, 24.8. HRMS (ESI-Quadrupole-Orbitrap)  $m/z$ :  $[M + Na]^+$  Calcd for  $C_{16}H_{19}O_4ClNa$  333.0864 (100.0%), 335.0835 (32.0%); Found 333.0869 (100.0%), 335.0841 (32.0%).  $[\alpha]_D^{22}$ : +6.5 (c 6.7,  $CHCl_3$ ); HPLC analysis: 99% ee (Chiralpak IC, 0.8:99.2  $i$ PrOH/hexanes, 1 mL/min, 220 nm),  $R_t$  (major) = 15.7 min,  $R_t$  (minor) = 17.4 min. IR (KBr thin film,  $cm^{-1}$ ):  $\nu$  2952, 1724, 1603, 1499, 1434, 1254, 923, 798, 742, 699.

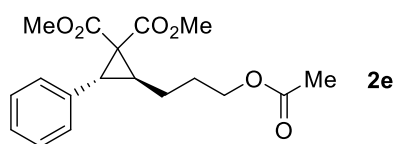

**Dimethyl (2*S*,3*R*)-2-(3-acetoxypropyl)-3-phenylcyclopropane-1,1-dicarboxylate (2e):**

Purified by flash chromatography on silica gel (petroleum ether/ethyl acetate, v:v = 20:1), yellow oil, 21.5 mg, 64% yield, 10:1 dr.  $^1H$  NMR (400 MHz,  $CDCl_3$ )  $\delta$  7.26–7.21 (m, 3H), 7.18 (d,  $J = 7.1$  Hz, 2H), 4.11 (t,  $J = 6.4$  Hz, 2H), 3.80 (s, 3H), 3.39 (s, 3H), 3.10 (d,  $J = 8.1$  Hz, 1H), 2.53 (dd,  $J = 15.2$ , 7.6 Hz, 1H), 2.05 (s, 3H), 1.85–1.78

(m, 2H), 1.69–1.59 (m, 2H).  $^{13}\text{C}$  NMR (101 MHz,  $\text{CDCl}_3$ )  $\delta$  171.3, 168.6, 167.6, 135.0, 128.6, 128.3, 127.5, 64.0, 52.9, 52.5, 42.9, 37.2, 30.5, 28.1, 24.3, 21.1. HRMS (ESI-Quadrupole-Orbitrap)  $m/z$ :  $[\text{M} + \text{Na}]^+$  Calcd for  $\text{C}_{18}\text{H}_{22}\text{O}_6\text{Na}$  357.1309; Found 357.1304.  $[\alpha]_{\text{D}}^{22}$ : +9.3 (c 0.3,  $\text{CHCl}_3$ ); HPLC analysis: 99% ee (Chiralpak IG, 2:98  $^i\text{PrOH}$ /hexanes, 1 mL/min, 220 nm),  $R_t$  (major) = 34.0 min,  $R_t$  (minor) = 42.3 min. IR (KBr thin film,  $\text{cm}^{-1}$ ):  $\nu$  2953, 1724, 1603, 1435, 1227, 963, 804, 758, 742, 698.

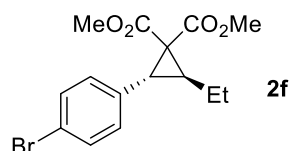

**Dimethyl (2*R*,3*S*)-2-(4-bromophenyl)-3-ethylcyclopropane-1,1-dicarboxylate (2f):**

Purified by flash chromatography on silica gel (petroleum ether/ethyl acetate, v:v = 20:1), yellow oil, 31.5 mg, 92% yield, 6:1 dr.  $^1\text{H}$  NMR (400 MHz,  $\text{CDCl}_3$ )  $\delta$  7.38 (d,  $J$  = 8.3 Hz, 2H), 7.06 (d,  $J$  = 8.3 Hz, 2H), 3.79 (s, 3H), 3.43 (s, 3H), 3.00 (d,  $J$  = 8.1 Hz, 1H), 2.43 (dd,  $J$  = 15.3, 7.6 Hz, 1H), 1.58–1.49 (m, 2H), 1.06 (t,  $J$  = 7.4 Hz, 3H).  $^{13}\text{C}$  NMR (151 MHz,  $\text{CDCl}_3$ )  $\delta$  168.5, 167.6, 134.5, 131.4, 130.4, 121.3, 52.9, 52.6, 43.0, 36.5, 32.9, 21.1, 13.3. HRMS (ESI-Quadrupole-Orbitrap)  $m/z$ :  $[\text{M} + \text{Na}]^+$  Calcd for  $\text{C}_{15}\text{H}_{17}\text{BrO}_4\text{Na}$  363.0202 (100.0%), 365.0182 (97.3%); Found 363.0201 (100.0%), 365.0180 (97.3%).  $[\alpha]_{\text{D}}^{22}$ : +27.7 (c 1.7,  $\text{CHCl}_3$ ); HPLC analysis: 99% ee (Chiralpak IG, 0.5:99.5  $^i\text{PrOH}$ /hexanes, 1 mL/min, 220 nm),  $R_t$  (major) = 26.8 min,  $R_t$  (minor) = 25.8 min. IR (KBr thin film,  $\text{cm}^{-1}$ ):  $\nu$  2950, 1724, 1632, 1491, 1435, 1294, 837, 744, 699, 619.

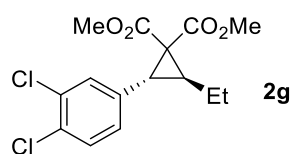

**Dimethyl (2*R*,3*S*)-2-(3,4-dichlorophenyl)-3-ethylcyclopropane-1,1-dicarboxylate (2g):**

Purified by flash chromatography on silica gel (petroleum ether/ethyl acetate, v:v = 20:1), yellow oil, 31.0 mg, 94% yield, 5:1 dr.  $^1\text{H}$  NMR (400 MHz,  $\text{CDCl}_3$ )  $\delta$  7.32 (d,  $J$  = 8.3 Hz, 1H), 7.29 (d,  $J$  = 1.9 Hz, 1H), 7.03 (dd,  $J$  = 8.3, 1.9 Hz, 1H), 3.80 (s, 3H), 3.48 (s, 3H), 2.99 (d,  $J$  = 8.1 Hz, 1H), 2.40 (dd,  $J$  = 15.2, 7.6 Hz, 1H), 1.56–1.46 (m,

2H), 1.06 (t,  $J = 7.4$  Hz, 3H).  $^{13}\text{C}$  NMR (101 MHz,  $\text{CDCl}_3$ )  $\delta$  168.3, 167.4, 135.9, 132.4, 131.5, 130.8, 130.2, 128.1, 53.0, 52.7, 43.0, 35.9, 33.0, 21.1, 13.3. HRMS (ESI-Quadrupole-Orbitrap)  $m/z$ :  $[\text{M} + \text{Na}]^+$  Calcd for  $\text{C}_{15}\text{H}_{16}\text{Cl}_2\text{O}_4\text{Na}$  353.0318 (100.0%), 355.0288 (63.9%); Found 353.0317 (100.0%), 355.0287 (63.9%).  $[\alpha]_{\text{D}}^{22}$ : +33.5 (c 0.9,  $\text{CHCl}_3$ ); HPLC analysis: 99% ee (Chiralpak IG, 1:99  $i$ PrOH/hexanes, 1 mL/min, 220 nm),  $R_t$  (major) = 9.7 min,  $R_t$  (minor) = 12.5 min. IR (KBr thin film,  $\text{cm}^{-1}$ ):  $\nu$  2953, 1724, 1558, 1476, 1435, 1244, 1218, 1031, 823, 681.

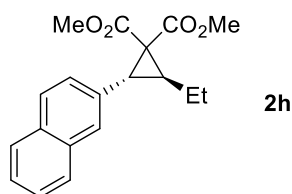

**Dimethyl (2*S*,3*R*)-2-ethyl-3-(naphthalen-2-yl)cyclopropane-1,1-dicarboxylate (2h):**

Purified by flash chromatography on silica gel (petroleum ether/ethyl acetate, v:v = 20:1), yellow oil, 29.6 mg, 95% yield, 8:1 dr.  $^1\text{H}$  NMR (400 MHz,  $\text{CDCl}_3$ )  $\delta$  7.80–7.73 (m, 3H), 7.64 (s, 1H), 7.47–7.42 (m, 2H), 7.33 (d,  $J = 8.5$  Hz, 1H), 3.82 (s, 3H), 3.33 (s, 3H), 3.24 (d,  $J = 8.2$  Hz, 1H), 2.62 (dd,  $J = 15.3, 7.6$  Hz, 1H), 1.65–1.59 (m, 2H), 1.12 (t,  $J = 7.4$  Hz, 3H).  $^{13}\text{C}$  NMR (151 MHz,  $\text{CDCl}_3$ )  $\delta$  168.8, 167.8, 133.30, 132.98, 132.7, 127.9, 127.7, 127.4, 126.9, 126.2, 125.9, 52.8, 52.4, 43.1, 37.4, 33.1, 21.2, 13.4. HRMS (ESI-Quadrupole-Orbitrap)  $m/z$ :  $[\text{M} + \text{Na}]^+$  Calcd for  $\text{C}_{19}\text{H}_{20}\text{O}_4\text{Na}$  335.1254; Found 335.1250.  $[\alpha]_{\text{D}}^{22}$ : +35.3 (c 0.3,  $\text{CHCl}_3$ ); HPLC analysis: 99% ee (Chiralpak IC, 3:97  $i$ PrOH/hexanes, 1 mL/min, 220 nm),  $R_t$  (major) = 4.5 min,  $R_t$  (minor) = 5.0 min. IR (KBr thin film,  $\text{cm}^{-1}$ ):  $\nu$  2952, 1724, 162, 1246, 1215, 1144, 909, 820, 745, 644.

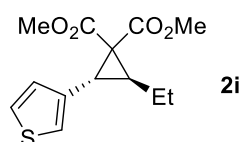

**Dimethyl (2*S*,3*S*)-2-ethyl-3-(thiophen-3-yl)cyclopropane-1,1-dicarboxylate (2i):**

Purified by flash chromatography on silica gel (petroleum ether/ethyl acetate, v:v = 20:1), yellow oil, 21.0 mg, 78% yield, 5:1 dr.  $^1\text{H}$  NMR (400 MHz,  $\text{CDCl}_3$ )  $\delta$  7.20 (dd,

$J = 5.0, 3.0$  Hz, 1H), 7.03–7.01 (m, 1H), 6.92 (d,  $J = 4.9$  Hz, 1H), 3.78 (s, 3H), 3.46 (s, 3H), 3.00 (d,  $J = 8.0$  Hz, 1H), 2.39 (dd,  $J = 15.2, 7.6$  Hz, 1H), 1.56–1.50 (m, 2H), 1.04 (t,  $J = 7.4$  Hz, 3H).  $^{13}\text{C}$  NMR (101 MHz,  $\text{CDCl}_3$ )  $\delta$  168.6, 167.8, 136.5, 128.1, 125.4, 122.5, 52.8, 52.5, 42.8, 34.0, 32.4, 20.9, 13.3. HRMS (ESI-Quadrupole-Orbitrap)  $m/z$ :  $[\text{M} + \text{Na}]^+$  Calcd for  $\text{C}_{13}\text{H}_{16}\text{O}_4\text{NaS}$  291.0662; Found 291.0666.  $[\alpha]_{\text{D}}^{22}$ : +31.2 (c 1.3,  $\text{CHCl}_3$ ); HPLC analysis: 99% ee (Chiralpak IG, 1.5:98.5  $^i\text{PrOH}$ /hexanes, 0.9 mL/min, 220 nm),  $R_t$  (major) = 12.1 min,  $R_t$  (minor) = 13.0 min. IR (KBr thin film,  $\text{cm}^{-1}$ ):  $\nu$  2951, 1723, 1435, 1293, 1206, 1093, 921, 806, 761, 633.

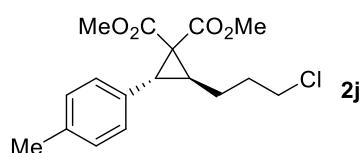

**Dimethyl (2*S*,3*R*)-2-(3-chloropropyl)-3-(*p*-tolyl)cyclopropane-1,1-dicarboxylate (2j):**

Purified by flash chromatography on silica gel (petroleum ether/ethyl acetate, v:v = 20:1), yellow oil, 19.4 mg, 60% yield, 12:1 dr.  $^1\text{H}$  NMR (400 MHz,  $\text{CDCl}_3$ )  $\delta$  7.06 (s, 4H), 3.80 (s, 3H), 3.60–3.57 (m, 2H), 3.41 (s, 3H), 3.08 (d,  $J = 8.2$  Hz, 1H), 2.47 (dd,  $J = 15.4, 7.4$  Hz, 1H), 2.30 (s, 3H), 2.00–1.90 (m, 2H), 1.74–1.67 (m, 2H).  $^{13}\text{C}$  NMR (151 MHz,  $\text{CDCl}_3$ )  $\delta$  168.6, 167.6, 137.1, 131.8, 129.1, 128.4, 52.9, 52.5, 44.4, 42.8, 36.9, 31.9, 30.2, 24.9, 21.2. HRMS (ESI-Quadrupole-Orbitrap)  $m/z$ :  $[\text{M} + \text{Na}]^+$  Calcd for  $\text{C}_{17}\text{H}_{21}\text{ClO}_4\text{Na}$  347.1021 (100.0%), 349.0991 (32.0%); Found 347.1020 (100.0%), 349.0990 (32.0%).  $[\alpha]_{\text{D}}^{22}$ : +6.7 (c 0.4,  $\text{CHCl}_3$ ); HPLC analysis: 99% ee (Chiralpak IC, 0.8:99.2  $^i\text{PrOH}$ /hexanes, 0.8 mL/min, 220 nm),  $R_t$  (major) = 21.1 min,  $R_t$  (minor) = 23.7 min. IR (KBr thin film,  $\text{cm}^{-1}$ ):  $\nu$  2951, 1724, 1518, 1435, 1294, 1253, 927, 820, 713, 650.

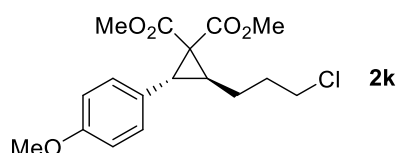

**Dimethyl (2*S*,3*R*)-2-(3-chloropropyl)-3-(4-methoxyphenyl)cyclopropane-1,1-dicarboxylate (2k):**

Purified by flash chromatography on silica gel (petroleum ether/ethyl acetate, v:v =

15:1), yellow oil, 17.5 mg, 51% yield, 10:1 dr.  $^1\text{H}$  NMR (400 MHz,  $\text{CDCl}_3$ )  $\delta$  7.10 (d,  $J = 8.2$  Hz, 2H), 6.80 (d,  $J = 8.2$  Hz, 2H), 3.80 (s, 3H), 3.77 (s, 3H), 3.59 (t,  $J = 6.3$  Hz, 2H), 3.42 (s, 3H), 3.07 (d,  $J = 8.2$  Hz, 1H), 2.46 (dd,  $J = 15.1, 7.5$  Hz, 1H), 1.99–1.90 (m, 2H), 1.73–1.68 (m, 2H).  $^{13}\text{C}$  NMR (101 MHz,  $\text{CDCl}_3$ )  $\delta$  168.6, 167.7, 158.9, 129.7, 126.8, 113.8, 55.4, 52.9, 52.5, 44.4, 42.8, 36.6, 31.9, 30.3, 24.9. HRMS (ESI-Quadrupole-Orbitrap)  $m/z$ :  $[\text{M} + \text{Na}]^+$  Calcd for  $\text{C}_{17}\text{H}_{21}\text{O}_5\text{ClNa}$  363.0970 (100.0%), 365.0940 (32.0%); Found 363.0971 (100.0%), 365.0943 (32.0%).  $[\alpha]_{\text{D}}^{22}$ : +35.3 (c 0.4,  $\text{CHCl}_3$ ); HPLC analysis: 99% ee (Chiralpak IA, 4:96  $i$ PrOH/hexanes, 1 mL/min, 220 nm),  $R_t$  (major) = 8.6 min,  $R_t$  (minor) = 6.4 min. IR (KBr thin film,  $\text{cm}^{-1}$ ):  $\nu$  2959, 2851, 1725, 1613, 1435, 1257, 1012, 922, 789, 661.

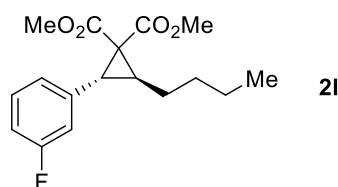

**Dimethyl (2*S*,3*R*)-2-butyl-3-(3-fluorophenyl)cyclopropane-1,1-dicarboxylate (21):**

Purified by flash chromatography on silica gel (petroleum ether/ethyl acetate, v:v = 20:1), yellow oil, 22.2 mg, 72% yield, 3:1 dr.  $^1\text{H}$  NMR (400 MHz,  $\text{CDCl}_3$ )  $\delta$  7.24–7.18 (m, 1H), 6.97 (d,  $J = 7.6$  Hz, 1H), 6.92–6.88 (m, 2H), 3.79 (s, 3H), 3.42 (s, 3H), 3.04 (d,  $J = 8.2$  Hz, 1H), 2.45 (dd,  $J = 14.6, 7.1$  Hz, 1H), 1.59–1.54 (m, 1H), 1.50–1.34 (m, 5H), 0.90 (t,  $J = 7.2$  Hz, 3H).  $^{13}\text{C}$  NMR (101 MHz,  $\text{CDCl}_3$ )  $\delta$  168.5, 167.5, 162.7 (C-F,  $^1J_{\text{C-F}} = 247.5$  Hz), 138.1 (C-F,  $^3J_{\text{C-F}} = 7.1$  Hz), 129.7 (C-F,  $^3J_{\text{C-F}} = 9.1$  Hz), 124.4 (C-F,  $^4J_{\text{C-F}} = 3.0$  Hz), 115.6 (C-F,  $^2J_{\text{C-F}} = 21.2$  Hz), 114.3 (C-F,  $^2J_{\text{C-F}} = 21.2$  Hz), 52.8, 52.5, 43.0, 36.6 (C-F,  $^4J_{\text{C-F}} = 2.0$  Hz), 31.3, 31.1, 27.2, 22.4, 14.1.  $^{19}\text{F}$  NMR (376 MHz,  $\text{CDCl}_3$ )  $\delta$  –113.5. HRMS (ESI-Quadrupole-Orbitrap)  $m/z$ :  $[\text{M} + \text{Na}]^+$  Calcd for  $\text{C}_{17}\text{H}_{21}\text{O}_4\text{FNa}$  331.1316; Found 331.1316.  $[\alpha]_{\text{D}}^{22}$ : +21.7 (c 4.2,  $\text{CHCl}_3$ ); HPLC analysis: 99% ee (Chiralcel OD-H, 0.3:99.7  $i$ PrOH/hexanes, 0.8 mL/min, 220 nm),  $R_t$  (major) = 12.1 min,  $R_t$  (minor) = 11.0 min. IR (KBr thin film,  $\text{cm}^{-1}$ ):  $\nu$  2954, 2861, 1725, 1614, 1588, 1435, 1292, 931, 773, 688.

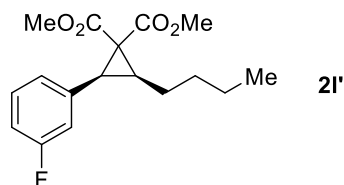

**Dimethyl (2*S*,3*S*)-2-butyl-3-(3-fluorophenyl)cyclopropane-1,1-dicarboxylate (2*l'*):**

$^1\text{H}$  NMR (400 MHz,  $\text{CDCl}_3$ )  $\delta$  7.24–7.20 (m, 1H), 7.00 (d,  $J = 7.7$  Hz, 1H), 6.95–6.91 (m, 2H), 3.79 (s, 3H), 3.64 (s, 3H), 3.08 (d,  $J = 10.0$  Hz, 1H), 1.99–1.93 (m, 1H), 1.75–1.67 (m, 2H), 1.51–1.38 (m, 2H), 1.37–1.25 (m, 2H), 0.87 (t,  $J = 7.2$  Hz, 3H).  $^{13}\text{C}$  NMR (101 MHz,  $\text{CDCl}_3$ )  $\delta$  171.2, 167.2, 162.6 (C-F,  $^1J_{\text{C-F}} = 246.4$  Hz), 136.7 (C-F,  $^3J_{\text{C-F}} = 8.1$  Hz), 129.6 (C-F,  $^3J_{\text{C-F}} = 9.1$  Hz), 125.5 (C-F,  $^4J_{\text{C-F}} = 3.0$  Hz), 116.7 (C-F,  $^2J_{\text{C-F}} = 22.2$  Hz), 114.0 (C-F,  $^2J_{\text{C-F}} = 20.2$  Hz), 53.1, 52.2, 37.8, 34.4 (C-F,  $^4J_{\text{C-F}} = 2.0$  Hz), 33.5, 31.8, 24.8, 22.7, 14.1.  $^{19}\text{F}$  NMR (376 MHz,  $\text{CDCl}_3$ )  $\delta$  -113.4. HRMS (ESI-Quadrupole-Orbitrap)  $m/z$ :  $[\text{M} + \text{Na}]^+$  Calcd for  $\text{C}_{17}\text{H}_{21}\text{O}_4\text{FNa}$  331.1316; Found 331.1315.  $[\alpha]_{\text{D}}^{22}$ : -34.5 (c 0.1,  $\text{CHCl}_3$ ); HPLC analysis: 99% ee (Chiralcel OD-H, 0.3:99.7  $i$ PrOH/hexanes, 0.8 mL/min, 220 nm),  $R_t$  (major) = 12.4 min,  $R_t$  (minor) = 13.2 min. IR (KBr thin film,  $\text{cm}^{-1}$ ):  $\nu$  2954, 2859, 1726, 1587, 1435, 1320, 1261, 1139, 954, 687.

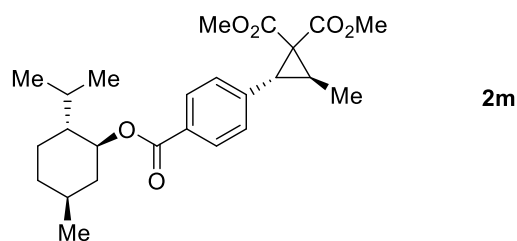

**Dimethyl (2*R*,3*S*)-2-(4-(((1*S*,2*R*,5*S*)-2-isopropyl-5-methylcyclohexyl)oxy)carbonyl)phenyl)-3-methylcyclopropane-1,1-dicarboxylate (2*m*):**

Purified by flash chromatography on silica gel (petroleum ether/ethyl acetate, v:v = 20:1), yellow oil, 38.8 mg, 90% yield, 5:1 dr.  $^1\text{H}$  NMR (400 MHz,  $\text{CDCl}_3$ )  $\delta$  7.92 (d,  $J = 8.2$  Hz, 2H), 7.25 (d,  $J = 8.6$  Hz, 2H), 4.90 (td,  $J = 10.9, 4.3$  Hz, 1H), 3.81 (s, 3H), 3.42 (s, 3H), 3.07 (d,  $J = 8.1$  Hz), 2.61–2.54 (m, 1H), 2.12–2.09 (m, 1H), 1.98–1.91 (m, 1H), 1.73–1.71 (m, 2H), 1.56–1.50 (m, 2H), 1.28 (d,  $J = 6.3$  Hz, 3H), 1.16–1.03 (m, 2H), 0.96–0.87 (m, 7H), 0.77 (d,  $J = 6.9$  Hz, 3H).  $^{13}\text{C}$  NMR (101 MHz,  $\text{CDCl}_3$ )  $\delta$

168.3, 167.5, 166.0, 140.4, 129.8, 129.5, 128.6, 75.0, 52.9, 52.6, 47.4, 43.5, 41.1, 37.7, 34.4, 31.6, 26.5, 25.6, 23.7, 22.2, 20.9, 16.6, 12.7. HRMS (ESI-Quadrupole-Orbitrap)  $m/z$ :  $[M + Na]^+$  Calcd for  $C_{25}H_{36}O_6Na$  453.2248; Found 453.2243.  $[\alpha]_D^{22}$ : 1.0 (c 4.1,  $CHCl_3$ ); IR (KBr thin film,  $cm^{-1}$ ):  $\nu$  2953, 2870, 1711, 1611, 1260, 1220, 982, 866, 789, 634.

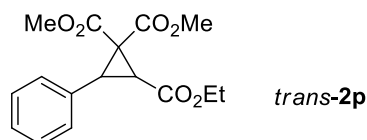

**2-ethyl 1,1-dimethyl 3-phenylcycloprop-2-ene-1,1,2-tricarboxylate (*trans*-2p):**

Purified by flash chromatography on silica gel (petroleum ether/ethyl acetate, v:v = 20:1), yellow oil, 27.5 mg, 90% yield, 5:1 dr.  $^1H$  NMR (400 MHz,  $CDCl_3$ )  $\delta$  7.29–7.25 (m, 5H), 4.25–4.17 (m, 2H), 3.82 (s, 3H), 3.64 (d,  $J = 7.6$  Hz, 1H), 3.48 (s, 3H), 3.24 (d,  $J = 7.5$  Hz, 1H), 1.30 (t,  $J = 7.1$  Hz, 3H).  $^{13}C$  NMR (101 MHz,  $CDCl_3$ )  $\delta$  169.2, 166.6, 165.8, 133.0, 128.7, 128.5, 127.9, 61.8, 53.3, 53.0, 44.2, 36.1, 31.3, 14.3. HRMS (ESI-Quadrupole-Orbitrap)  $m/z$ :  $[M + Na]^+$  Calcd for  $C_{16}H_{18}O_6Na$  329.0996; Found 329.1005.  $[\alpha]_D^{26}$ : +24.8 (c 1.6,  $CHCl_3$ ); HPLC analysis: 92% ee (Chiralpak IC, 3:97  $i$ PrOH/hexanes, 1 mL/min, 220 nm),  $R_t$  (major) = 34.2 min,  $R_t$  (minor) = 37.5 min. IR (KBr thin film,  $cm^{-1}$ ):  $\nu$  2196, 2018, 1734, 1437, 1264, 1038, 895, 735, 702 464.

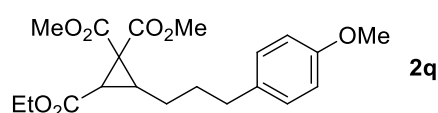

**2-Ethyl 1,1-dimethyl 3-(3-(4-methoxyphenyl)propyl)cyclopropane-1,1,2-tricarboxylate (2q):**

Purified by flash chromatography on silica gel (petroleum ether/ethyl acetate, v:v = 20:1), yellow oil, 14.7 mg, 39% yield, 1:1 dr. *trans*-2q:  $^1H$  NMR (400 MHz,  $CDCl_3$ )  $\delta$  7.07 (d,  $J = 8.4$  Hz, 2H), 6.82 (d,  $J = 8.5$  Hz, 2H), 4.19–4.07 (m, 2H), 3.78 (s, 3H), 3.73–3.72 (m, 6H), 2.61–2.55 (m, 3H), 2.34 (dd,  $J = 14.4, 7.2$  Hz, 1H), 1.75–1.62 (m, 2H), 1.58–1.47 (m, 2H), 1.25 (t,  $J = 7.1$  Hz, 3H).  $^{13}C$  NMR (151 MHz,  $CDCl_3$ )  $\delta$  169.6, 167.3, 167.0, 157.9, 134.1, 129.4, 113.9, 61.5, 55.4, 53.2, 53.0, 42.1, 34.4, 33.0, 32.8, 30.9, 25.6, 14.3. HRMS (ESI-Quadrupole-Orbitrap)  $m/z$ :  $[M + Na]^+$  Calcd for

C<sub>20</sub>H<sub>26</sub>O<sub>7</sub>Na 401.1571; Found 401.1574. [ $\alpha$ ]<sub>D</sub><sup>22</sup>: +0.6 (c 4.0, CHCl<sub>3</sub>); HPLC analysis: 89% ee (Chiralpak IG, 15:85 <sup>i</sup>PrOH/hexanes, 1 mL/min, 220 nm), R<sub>t</sub> (major) = 15.3 min, R<sub>t</sub> (minor) = 18.4 min. IR (KBr thin film, cm<sup>-1</sup>):  $\nu$  2953, 1728, 1512, 1435, 1244, 1178, 812, 735, 702, 519.

*cis*-**2q**: <sup>1</sup>H NMR (400 MHz, CDCl<sub>3</sub>)  $\delta$  7.08 (d,  $J$  = 8.4 Hz, 2H), 6.81 (d,  $J$  = 8.4 Hz, 2H), 4.17–4.10 (m, 2H), 3.78 (s, 3H), 3.75–3.73 (m, 6H), 2.60–2.56 (m, 3H), 2.01–1.77 (m, 4H), 1.63 (dd,  $J$  = 16.9, 9.0 Hz, 1H), 1.24 (d,  $J$  = 7.2 Hz, 3H). <sup>13</sup>C NMR (101 MHz, CDCl<sub>3</sub>)  $\delta$  169.9, 168.4, 165.7, 157.8, 134.5, 129.4, 113.9, 61.2, 55.4, 53.4, 52.6, 39.2, 34.8, 33.3, 31.6, 30.7, 23.5, 14.3. HRMS (ESI-Quadrupole-Orbitrap)  $m/z$ : [M + Na]<sup>+</sup> Calcd for C<sub>20</sub>H<sub>26</sub>O<sub>7</sub>Na 401.1571; Found 401.1570. [ $\alpha$ ]<sub>D</sub><sup>22</sup>: +5.8 (c 1.4, CHCl<sub>3</sub>); HPLC analysis: 74% ee (Chiralpak IG, 5:95 <sup>i</sup>PrOH/hexanes, 0.5 mL/min, 220 nm), R<sub>t</sub> (major) = 37.7 min, R<sub>t</sub> (minor) = 35.9 min. IR (KBr thin film, cm<sup>-1</sup>):  $\nu$  2955, 1731, 1612, 1512, 1436, 1375, 812, 736, 704, 516.

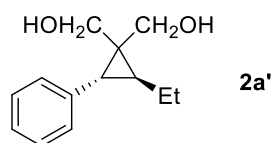

**((2*S*,3*R*)-2-Ethyl-3-phenylcyclopropane-1,1-diyl)dimethanol (**2a'**):**

Purified by flash chromatography on silica gel (petroleum ether/ethyl acetate, v:v = 1:1), amorphous white solid, mp 67–69 °C, 58.7 mg, 95% yield, >20:1 dr. <sup>1</sup>H NMR (400 MHz, CDCl<sub>3</sub>)  $\delta$  7.30–7.26 (m, 2H), 7.24–7.18 (m, 3H), 3.96 (d,  $J$  = 11.4 Hz, 1H), 3.88 (d,  $J$  = 11.4 Hz, 1H), 3.54 (d,  $J$  = 11.6 Hz, 1H), 3.40 (d,  $J$  = 11.6 Hz, 1H), 2.17 (br, 2H), 1.99 (d,  $J$  = 6.1 Hz, 1H), 1.72–1.61 (m, 1H), 1.56–1.45 (m, 1H), 1.39–1.34 (m, 1H), 1.10 (t,  $J$  = 7.3 Hz, 3H). <sup>13</sup>C NMR (151 MHz, CDCl<sub>3</sub>)  $\delta$  138.4, 128.9, 128.5, 126.5, 67.5, 66.7, 34.9, 33.3, 28.9, 22.1, 14.5. HRMS (ESI-Quadrupole-Orbitrap)  $m/z$ : [M + Na]<sup>+</sup> Calcd for C<sub>13</sub>H<sub>18</sub>O<sub>2</sub>Na 229.1199; Found 229.1198. [ $\alpha$ ]<sub>D</sub><sup>22</sup>: –60.2 (c 0.1, CHCl<sub>3</sub>); HPLC analysis: 99% ee (Chiralcel OD-H, 15:85 <sup>i</sup>PrOH/hexanes, 1 mL/min, 220 nm), R<sub>t</sub> (major) = 6.2 min, R<sub>t</sub> (minor) = 5.5 min. IR (KBr thin film, cm<sup>-1</sup>):  $\nu$  3288, 2922, 1447, 1260, 1068, 1015, 941, 801, 741, 696.

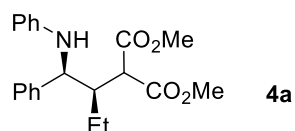

**Dimethyl 2-((1S,2R)-1-phenyl-1-(phenylamino)butan-2-yl)malonate (4a):**

Purified by flash chromatography on silica gel (petroleum ether/ethyl acetate, v:v = 10:1), yellow oil, 30.7 mg, 86% yield, >20:1 dr. <sup>1</sup>H NMR (400 MHz, CDCl<sub>3</sub>) δ 7.38 (d, *J* = 7.5 Hz, 2H), 7.32–7.29 (m, 2H), 7.22 (dd, *J* = 7.2, 7.2 Hz, 1H), 7.10–7.04 (m, 2H), 6.64–6.62 (dd, *J* = 7.3, 7.3 Hz, 1H), 6.48 (d, *J* = 8.2 Hz, 2H), 4.82 (dd, *J* = 7.9, 3.2 Hz, 1H), 4.33 (d, *J* = 8.0 Hz, 1H), 3.72 (s, 3H), 3.62 (d, *J* = 5.7 Hz, 1H), 3.53 (s, 3H), 2.61–2.56 (m, 1H), 1.59–1.53 (m, 2H), 0.81 (t, *J* = 7.4 Hz, 3H). <sup>13</sup>C NMR (101 MHz, CDCl<sub>3</sub>) δ 170.0, 169.6, 147.1, 141.9, 129.2, 128.6, 127.1, 127.0, 117.5, 113.5, 56.0, 52.8, 52.7, 52.6, 47.3, 19.1, 13.1. HRMS (ESI-Quadrupole-Orbitrap) *m/z*: [M + Na]<sup>+</sup> Calcd for C<sub>21</sub>H<sub>25</sub>O<sub>4</sub>NNa 378.1676; Found 378.1671. [α]<sub>D</sub><sup>22</sup>: +7.1 (c 3.0, CHCl<sub>3</sub>); HPLC analysis: 99% ee (Chiralpak IA, 2:98 <sup>i</sup>PrOH/hexanes, 1 mL/min, 254 nm), R<sub>t</sub> (major) = 8.0 min, R<sub>t</sub> (minor) = 7.4 min. IR (KBr thin film, cm<sup>-1</sup>): ν 2953, 1732, 1695, 1600, 1497, 1259, 883, 748, 691, 505.

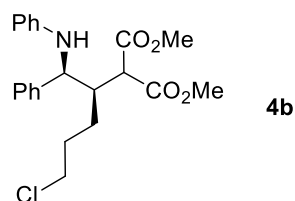

**Dimethyl 2-((1S,2R)-5-chloro-1-phenyl-1-(phenylamino)pentan-2-yl)malonate (4b):**

Purified by flash chromatography on silica gel (petroleum ether/ethyl acetate, v:v = 10:1), yellow oil, 36.9 mg, 91% yield, >20:1 dr. <sup>1</sup>H NMR (400 MHz, CDCl<sub>3</sub>) δ 7.31 (d, *J* = 7.7 Hz, 2H), 7.24 (d, *J* = 7.5 Hz, 2H), 7.17–7.12 (m, 3H), 6.84 (d, *J* = 8.2 Hz, 2H), 6.74 (dd, *J* = 7.3, 7.2 Hz, 1H), 4.71 (d, *J* = 4.3 Hz, 1H), 3.76 (s, 3H), 3.66 (s, 3H), 3.53–3.48 (m, 1H), 3.36 (ddd, *J* = 12.6, 9.1, 3.7 Hz, 1H), 3.01–2.96 (m, 1H), 1.90–1.75 (m, 2H), 1.68–1.48 (m, 3H). <sup>13</sup>C NMR (101 MHz, CDCl<sub>3</sub>) δ 169.8, 169.3, 151.8, 140.6, 129.1, 128.5, 128.0, 126.8, 119.4, 117.6, 61.6, 53.1, 52.7, 52.6, 47.7, 40.5, 23.4, 22.2. HRMS (ESI-Quadrupole-Orbitrap) *m/z*: [M + H]<sup>+</sup> Calcd for C<sub>22</sub>H<sub>27</sub>O<sub>4</sub>NCl

404.1623 (100.0%), 406.1594 (32.0%); Found 404.1621 (100.0%), 406.1604 (32.0%)..  
[ $\alpha$ ]<sub>D</sub><sup>22</sup>: +2.0 (c 1.7, CHCl<sub>3</sub>); HPLC analysis: 99% ee (Chiralpak IG, 2:98  
<sup>i</sup>PrOH/hexanes, 1 mL/min, 254 nm), R<sub>t</sub> (major) = 9.8 min, R<sub>t</sub> (minor) = 12.9 min. IR  
(KBr thin film, cm<sup>-1</sup>):  $\nu$  2926, 1732, 1598, 1501, 1426, 1264, 896, 735, 703, 564.

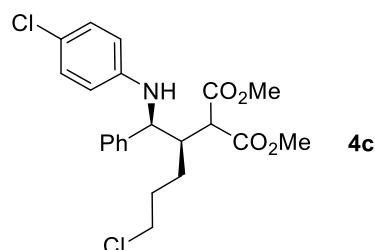

**Dmethyl 2-((1*S*,2*R*)-5-chloro-1-((4-chlorophenyl)amino)-1-phenylpentan-2-yl)malonate (4c):**

Purified by flash chromatography on silica gel (petroleum ether/ethyl acetate, v:v = 10:1), yellow oil, 30.6 mg, 70% yield, >20:1 dr. <sup>1</sup>H NMR (400 MHz, CDCl<sub>3</sub>)  $\delta$  7.27–7.22 (m, 4H), 7.18–7.15 (m, 1H), 7.09–7.05 (m, 2H), 6.78–6.74 (m, 2H), 4.59 (d, *J* = 4.8 Hz, 1H), 3.76 (s, 3H), 3.67–3.65 (m, 4H), 3.43–3.30 (m, 2H), 3.00–2.90 (m, 1H), 1.92–1.76 (m, 2H), 1.72–1.66 (m, 1H), 1.55–1.48 (m, 1H). <sup>13</sup>C NMR (151 MHz, CDCl<sub>3</sub>)  $\delta$  169.7, 169.2, 150.5, 140.3, 129.0, 128.6, 128.0, 127.1, 124.5, 119.3, 62.1, 53.0, 52.7, 52.6, 48.6, 40.7, 23.5, 22.4. [ $\alpha$ ]<sub>D</sub><sup>22</sup>: +18.0 (c 0.3, CHCl<sub>3</sub>); HPLC analysis: 99% ee (Chiralpak IC, 0.5:99.5 <sup>i</sup>PrOH/hexanes, 1 mL/min, 254 nm), R<sub>t</sub> (major) = 16.1 min, R<sub>t</sub> (minor) = 14.1 min. IR (KBr thin film, cm<sup>-1</sup>):  $\nu$  2950, 2852, 1731, 1595, 1495, 1434, 1244, 811, 704, 611.

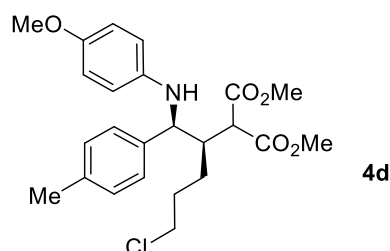

**Dimethyl 2-((1*S*,2*R*)-5-chloro-1-((4-methoxyphenyl)amino)-1-(p-tolyl)pentan-2-yl)malonate (4d):**

Purified by flash chromatography on silica gel (petroleum ether/ethyl acetate, v:v = 10:1), yellow oil, 27.2 mg, 61% yield, >20:1 dr. <sup>1</sup>H NMR (400 MHz, CDCl<sub>3</sub>)  $\delta$  7.11 (d,

$J = 8.0$  Hz, 2H), 6.96 (d,  $J = 8.0$  Hz, 2H), 6.86–6.82 (m, 2H), 6.65–6.61 (m, 2H), 4.12 (d,  $J = 7.7$  Hz, 1H), 3.75 (s, 3H), 3.67 (s, 3H), 3.62 (s, 3H), 3.40 (d,  $J = 5.8$  Hz, 1H), 3.28–3.23 (m, 1H), 3.07–3.01 (m, 1H), 2.69–2.62 (m, 1H), 2.22 (s, 3H), 1.91–1.77 (m, 3H), 1.65–1.58 (m, 2H).  $^{13}\text{C}$  NMR (101 MHz,  $\text{CDCl}_3$ )  $\delta$  169.8, 169.4, 154.7, 146.3, 137.9, 136.4, 128.9, 128.6, 123.4, 113.9, 65.7, 55.4, 54.0, 52.9, 52.5, 52.3, 42.9, 25.4, 24.7, 21.2.  $[\alpha]_{\text{D}}^{22}$ : +19.7 (c 0.8,  $\text{CHCl}_3$ ); HPLC analysis: 99% ee (Chiralpak IG, 5:95  $i$ PrOH/hexanes, 1 mL/min, 254 nm),  $R_{\text{t}}$  (major) = 13.2 min,  $R_{\text{t}}$  (minor) = 21.8 min. IR (KBr thin film,  $\text{cm}^{-1}$ ):  $\nu$  2923, 2852, 1731, 1508, 1435, 1285, 1238, 805, 717, 559.

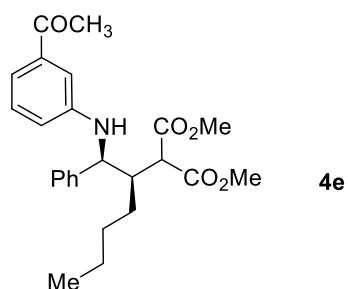

**Dimethyl 2-((1S,2R)-1-((3-acetylphenyl)amino)-1-phenylhexan-2-yl)malonate (4e):**

Purified by flash chromatography on silica gel (petroleum ether/ethyl acetate, v:v = 10:1), yellow oil, 30.6 mg, 72% yield, >20:1 dr.  $^1\text{H}$  NMR (400 MHz,  $\text{CDCl}_3$ )  $\delta$  7.35 (d,  $J = 7.4$  Hz, 2H), 7.32–7.28 (m, 2H), 7.23–7.19 (m, 2H), 7.15–7.11 (m, 2H), 6.62 (dd,  $J = 8.0, 2.4$  Hz, 1H), 4.84 (dd,  $J = 8.0, 3.1$  Hz), 4.56 (d,  $J = 8.0$  Hz, 1H), 3.73 (s, 3H), 3.59 (d,  $J = 5.6$  Hz, 1H), 3.55 (s, 3H), 2.65–2.60 (m, 1H), 2.48 (s, 3H), 1.58–1.45 (m, 2H), 1.19–1.00 (m, 3H), 0.88–0.85 (m, 1H), 0.75 (t,  $J = 7.1$  Hz, 3H).  $^{13}\text{C}$  NMR (101 MHz,  $\text{CDCl}_3$ )  $\delta$  198.7, 169.9, 169.6, 147.4, 141.3, 138.1, 129.5, 128.7, 127.3, 126.9, 117.9, 117.7, 113.0, 58.2, 53.1, 52.7, 52.6, 45.3, 30.4, 26.8, 25.7, 22.6, 13.8. HRMS (ESI-Quadrupole-Orbitrap)  $m/z$ :  $[\text{M} + \text{Na}]^+$  Calcd for  $\text{C}_{25}\text{H}_{31}\text{O}_5\text{NNa}$  448.2094; Found 448.2091.  $[\alpha]_{\text{D}}^{22}$ : +26.1 (c 1.6,  $\text{CHCl}_3$ ); HPLC analysis: 99% ee (Chiralpak IA, 3:97  $i$ PrOH/hexanes, 1 mL/min, 254 nm),  $R_{\text{t}}$  (major) = 33.4 min,  $R_{\text{t}}$  (minor) = 21.4 min. IR (KBr thin film,  $\text{cm}^{-1}$ ):  $\nu$  2922, 2853, 1742, 1683, 1456, 1358, 1258, 789, 687, 587.

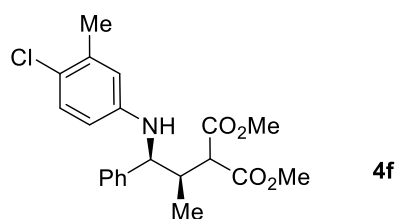

**Dimethyl 2-((1*S*,2*R*)-1-((4-chloro-3-methylphenyl)amino)-1-phenylpropan-2-yl)malonate (4f):**

Purified by flash chromatography on silica gel (petroleum ether/ethyl acetate, v:v = 10:1), yellow oil, 37.2 mg, 95% yield, >20:1 dr. <sup>1</sup>H NMR (400 MHz, CDCl<sub>3</sub>) δ 7.31–7.29 (m, 4H), 7.25–7.21 (m, 1H), 6.99 (d, *J* = 8.6 Hz, 1H), 6.40 (d, *J* = 2.6 Hz, 1H), 6.25 (dd, *J* = 8.6, 2.7 Hz, 1H), 4.63 (d, *J* = 3.8 Hz, 1H), 4.18 (br, 1H), 3.72 (s, 3H), 3.68 (s, 3H), 3.56 (d, *J* = 8.1 Hz, 1H), 2.84–2.75 (m, 1H), 2.21 (s, 3H), 0.94 (d, *J* = 7.1 Hz, 3H). <sup>13</sup>C NMR (151 MHz, CDCl<sub>3</sub>) δ 169.5, 169.3, 145.8, 141.3, 136.6, 129.5, 128.7, 127.3, 126.8, 122.8, 116.0, 112.2, 58.6, 54.9, 52.8, 52.7, 39.9, 20.4, 11.2. HRMS (ESI-Quadrupole-Orbitrap) *m/z*: [M + H]<sup>+</sup> Calcd for C<sub>21</sub>H<sub>25</sub>O<sub>4</sub>NCl 390.1467 (100.0%), 392.1437 (32.0%); Found 390.1466 (100.0%), 392.1432 (32.0%).. [α]<sub>D</sub><sup>22</sup>: –44.0 (c 0.2, CHCl<sub>3</sub>); HPLC analysis: 99% ee (Chiralpak IC, 1:99 <sup>i</sup>PrOH/hexanes, 1 mL/min, 254 nm), R<sub>t</sub> (major) = 9.3 min, R<sub>t</sub> (minor) = 12.0 min. IR (KBr thin film, cm<sup>-1</sup>): ν 3422, 2951, 2924, 1738, 1583, 1451, 1268, 819, 702, 622.

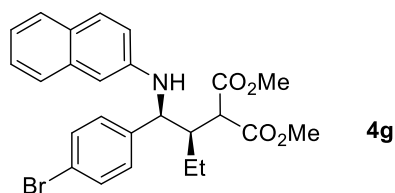

**Dimethyl 2-((1*S*,2*R*)-1-(4-bromophenyl)-1-(naphthalen-2-ylamino)butan-2-yl)malonate (4g):**

Purified by flash chromatography on silica gel (petroleum ether/ethyl acetate, v:v = 10:1), yellow oil, 41.0 mg, 85% yield, 6:1 dr. <sup>1</sup>H NMR (400 MHz, CDCl<sub>3</sub>) δ 7.61 (dd, *J* = 12.0, 8.5 Hz, 2H), 7.47–7.43 (m, 3H), 7.34–7.27 (m, 3H), 7.18–7.14 (m, 1H), 6.90–6.88 (m, 1H), 6.49 (s, 1H), 4.93 (dd, *J* = 6.3, 1.0 Hz, 1H), 4.55 (d, *J* = 7.6 Hz, 1H), 3.74 (s, 3H), 3.66 (d, *J* = 5.3 Hz, 1H), 3.49 (s, 3H), 2.61–2.57 (m, 1H), 1.68–1.62 (m, 1H), 1.56–1.49 (m, 1H), 0.85 (t, *J* = 7.3 Hz, 3H). <sup>13</sup>C NMR (101 MHz, CDCl<sub>3</sub>) δ

170.0, 169.4, 144.3, 140.9, 135.0, 131.8, 129.0, 128.8, 127.7, 127.6, 126.4, 126.2, 122.3, 121.0, 117.9, 105.9, 57.6, 52.8, 52.7, 52.5, 47.2, 18.9, 13.0. HRMS (ESI-Quadrupole-Orbitrap)  $m/z$ :  $[M + H]^+$  Calcd for  $C_{25}H_{27}O_4NBr$  484.1118 (100.0%), 486.1098 (97.3%); Found 484.1116 (100.0%), 486.1092 (97.3%).  $[\alpha]_D^{22}$ :  $-63.5$  (c 0.3,  $CHCl_3$ ); HPLC analysis: 99% ee (Chiralpak IC, 1.5:98.5  $i$ PrOH/hexanes, 1 mL/min, 254 nm),  $R_t$  (major) = 7.7 min,  $R_t$  (minor) = 8.4 min. IR (KBr thin film,  $cm^{-1}$ ):  $\nu$  2925, 1729, 1630, 1435, 1264, 808, 734, 702, 620, 472.

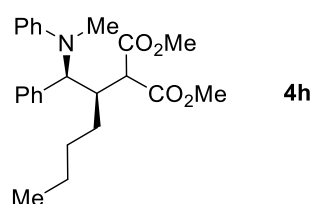

**Dimethyl 2-((1*S*,2*R*)-1-(methyl(phenyl)amino)-1-phenylhexan-2-yl)malonate (4h):**

Purified by flash chromatography on silica gel (petroleum ether/ethyl acetate, v:v = 10:1), yellow oil, 31.8 mg, 80% yield, >20:1 dr.  $^1H$  NMR (400 MHz,  $CDCl_3$ )  $\delta$  7.23–7.19 (m, 5H), 7.09–7.07 (m, 2H), 6.88 (d,  $J = 8.2$  Hz, 2H), 6.81–6.77 (m, 1H), 5.02 (d,  $J = 11.7$  Hz, 1H), 3.93 (d,  $J = 6.0$  Hz, 1H), 3.65 (s, 3H), 3.59 (s, 3H), 3.22–3.16 (m, 1H), 2.37 (s, 3H), 1.56–1.48 (m, 1H), 1.36–1.29 (m, 1H), 1.23–1.07 (m, 4H), 0.74 (t,  $J = 7.1$  Hz, 3H).  $^{13}C$  NMR (101 MHz,  $CDCl_3$ )  $\delta$  169.9, 169.6, 150.5, 136.3, 128.9, 128.2, 128.1, 127.5, 118.7, 116.2, 67.3, 52.7, 52.29, 52.25, 39.1, 32.0, 29.0, 28.9, 23.0, 13.9. HRMS (ESI-Quadrupole-Orbitrap)  $m/z$ :  $[M + Na]^+$  Calcd for  $C_{24}H_{31}O_4NNa$  Calculated 420.2145; Found 420.2140.  $[\alpha]_D^{22}$ :  $+18.3$  (c 0.2,  $CHCl_3$ ); HPLC analysis: 98% ee (Chiralcel OD-H, 0.3:99.7  $i$ PrOH/hexanes, 1 mL/min, 254 nm),  $R_t$  (major) = 16.4 min,  $R_t$  (minor) = 15.5 min. IR (KBr thin film,  $cm^{-1}$ ):  $\nu$  2953, 2871, 1729, 1596, 1497, 1433, 1254, 792, 748, 699.

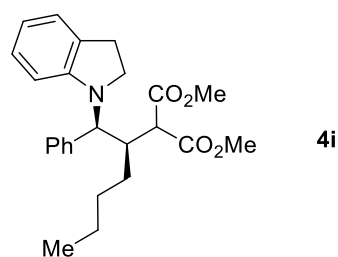

**Dimethyl 2-((1*S*,2*R*)-1-(indolin-1-yl)-1-phenylhexan-2-yl)malonate (4i):**

Purified by flash chromatography on silica gel (petroleum ether/ethyl acetate, v:v = 10:1), yellow oil, 37.2 mg, 91% yield, >20:1 dr.  $^1\text{H}$  NMR (400 MHz,  $\text{CDCl}_3$ )  $\delta$  7.32–7.23 (m, 5H), 7.11–7.08 (m, 1H), 6.94 (d,  $J = 7.1$  Hz, 1H), 6.78 (d,  $J = 7.9$  Hz, 1H), 6.61–6.58 (m, 1H), 4.92 (d,  $J = 11.8$  Hz, 1H), 3.83 (d,  $J = 6.6$  Hz, 1H), 3.63 (s, 3H), 3.53 (s, 3H), 3.44–3.38 (m, 1H), 3.22–3.14 (m, 1H), 2.93–2.69 (m, 3H), 1.45–1.28 (m, 2H), 1.24–1.06 (m, 4H), 0.75 (t,  $J = 7.1$  Hz, 3H).  $^{13}\text{C}$  NMR (101 MHz,  $\text{CDCl}_3$ )  $\delta$  169.8, 169.7, 150.7, 136.1, 129.7, 128.9, 128.3, 127.6, 127.1, 124.5, 117.6, 108.0, 61.6, 53.1, 52.2, 52.0, 46.6, 39.8, 29.3, 28.3, 28.1, 22.9, 13.9. HRMS (ESI-Quadrupole-Orbitrap)  $m/z$ :  $[\text{M} + \text{Na}]^+$  Calcd for  $\text{C}_{25}\text{H}_{31}\text{O}_4\text{NNa}$  Calculated 432.2145; Found 432.2140.  $[\alpha]_{\text{D}}^{22}$ :  $-45.6$  (c 0.3,  $\text{CHCl}_3$ ); HPLC analysis: 97% ee (Chiralpak IA, 1:99  $i$ PrOH/hexanes, 1 mL/min, 254 nm),  $R_t$  (major) = 13.6 min,  $R_t$  (minor) = 10.2 min. IR (KBr thin film,  $\text{cm}^{-1}$ ):  $\nu$  2952, 2928, 1728, 1472, 1434, 1250, 917, 827, 740, 641.

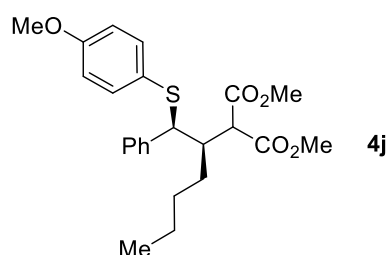

**Dimethyl 2-((1S,2R)-1-((4-methoxyphenyl)thio)-1-phenylhexan-2-yl)malonate (4j):**

Purified by flash chromatography on silica gel (petroleum ether/ethyl acetate, v:v = 10:1), yellow oil, 31.2 mg, 72% yield, 6:1 dr.  $^1\text{H}$  NMR (400 MHz,  $\text{CDCl}_3$ )  $\delta$  7.24 – 7.20 (m, 2H), 7.20–7.14 (m, 3H), 7.13–7.09 (m, 2H), 6.72–6.68 (d,  $J = 8.7$  Hz, 2H), 4.16 (d,  $J = 9.2$  Hz, 1H), 4.11 (d,  $J = 5.1$  Hz, 1H), 3.76 (s, 3H), 3.74 (s, 3H), 3.72 (s, 3H), 2.71–2.65 (m, 1H), 1.56–1.36 (m, 2H), 1.11–1.02 (m, 3H), 0.98–0.92 (m, 1H), 0.70 (t,  $J = 7.0$  Hz, 3H).  $^{13}\text{C}$  NMR (151 MHz,  $\text{CDCl}_3$ )  $\delta$  169.9, 169.4, 159.6, 141.2, 135.7, 128.8, 128.2, 127.2, 125.0, 114.4, 59.2, 55.4, 53.6, 52.6, 52.4, 43.7, 30.4, 30.0, 22.8, 13.9. HRMS (ESI-Quadrupole-Orbitrap)  $m/z$ :  $[\text{M} + \text{Na}]^+$  Calcd for  $\text{C}_{24}\text{H}_{30}\text{O}_5\text{SNa}$  Calculated 453.1706; Found 453.1700.  $[\alpha]_{\text{D}}^{22}$ :  $-41.8$  (c 0.3,  $\text{CHCl}_3$ ); HPLC analysis: 96% ee (Chiralpak IA, 2:98  $i$ PrOH/hexanes, 1 mL/min, 254 nm),  $R_t$

(major) = 5.6 min,  $R_t$  (minor) = 6.7 min. IR (KBr thin film,  $\text{cm}^{-1}$ ):  $\nu$  2953, 2859, 1731, 1592, 1493, 1285, 1243, 827, 700, 641.

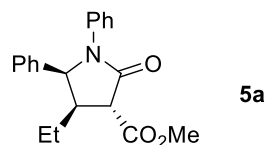

**Methyl (3*R*,4*R*,5*S*)-4-ethyl-2-oxo-1,5-diphenylpyrrolidine-3-carboxylate (**5a**):**

Purified by flash chromatography on silica gel (petroleum ether/ethyl acetate, v:v = 5:1), amorphous white solid, mp 76–79 °C, 29.3 mg, 91% yield, >20:1 dr.  $^1\text{H}$  NMR (400 MHz,  $\text{CDCl}_3$ )  $\delta$  7.48–7.46 (m, 2H), 7.37–7.30 (m, 3H), 7.25–7.17 (m, 4H), 7.08–7.05 (m, 1H), 5.23 (d,  $J$  = 8.1 Hz, 1H), 3.84 (s, 3H), 3.58 (d,  $J$  = 11.7 Hz, 1H), 3.20–3.12 (m, 1H), 1.27–1.19 (m, 1H), 0.93–0.88 (m, 1H), 0.85–0.81 (m, 3H).  $^{13}\text{C}$  NMR (151 MHz,  $\text{CDCl}_3$ )  $\delta$  170.8, 169.7, 138.2, 137.1, 129.1, 128.9, 128.5, 127.1, 125.3, 121.7, 66.4, 54.4, 52.9, 43.8, 23.6, 12.1. HRMS (ESI-Quadrupole-Orbitrap)  $m/z$ :  $[\text{M} + \text{Na}]^+$  Calcd for  $\text{C}_{20}\text{H}_{21}\text{O}_3\text{NNa}$  346.1414; Found 346.1412.  $[\alpha]_{\text{D}}^{22}$ : +39.8 (c 0.4,  $\text{CHCl}_3$ ); HPLC analysis: 99% ee (Chiralpak IA, 15:85  $i$ PrOH/hexanes, 1 mL/min, 254 nm),  $R_t$  (major) = 17.6 min,  $R_t$  (minor) = 7.7 min. IR (KBr thin film,  $\text{cm}^{-1}$ ):  $\nu$  2963, 2930, 1746, 1682, 1499, 1269, 1212, 811, 725, 698.

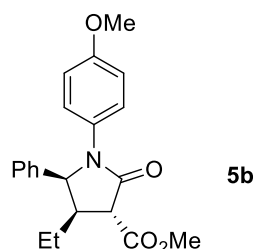

**Methyl (3*R*,4*R*,5*S*)-4-ethyl-1-(4-methoxyphenyl)-2-oxo-5-phenylpyrrolidine-3-carboxylate (**5b**):**

Purified by flash chromatography on silica gel (petroleum ether/ethyl acetate, v:v = 5:1), amorphous white solid, mp 91–94 °C, 25.2 mg, 71% yield, >20:1 dr.  $^1\text{H}$  NMR (400 MHz,  $\text{CDCl}_3$ ) 7.35–7.29 (m, 5H), 7.16 (d,  $J$  = 7.2 Hz, 2H), 6.75 (d,  $J$  = 8.9 Hz, 2H), 5.15 (d,  $J$  = 8.1 Hz, 1H), 3.84 (s, 3H), 3.71 (s, 3H), 3.56 (d,  $J$  = 11.6 Hz, 1H), 3.20–3.12 (m, 1H), 1.25–1.16 (m, 1H), 0.93–0.85 (m, 1H), 0.82 (t,  $J$  = 7.0 Hz, 3H).  $^{13}\text{C}$  NMR (101 MHz,  $\text{CDCl}_3$ )  $\delta$  170.9, 169.4, 157.1, 137.3, 131.3, 129.0, 128.4, 127.2,

123.7, 114.1, 66.9, 55.5, 54.3, 52.9, 43.9, 23.7, 12.1. HRMS (ESI-Quadrupole-Orbitrap)  $m/z$ :  $[M + Na]^+$  Calcd for  $C_{21}H_{23}O_4NNa$  376.1519; Found 376.1517.  $[\alpha]_D^{22}$ : +14.5 (c 1.7,  $CHCl_3$ ); HPLC analysis: 99% ee (Chiralcel OD-H, 25:75  $i$ PrOH/hexanes, 1 mL/min, 254 nm),  $R_t$  (major) = 11.9 min,  $R_t$  (minor) = 10.1 min. IR (KBr thin film,  $cm^{-1}$ ):  $\nu$  2957, 1739, 1683, 1509, 1463, 1238, 824, 732, 701, 516.

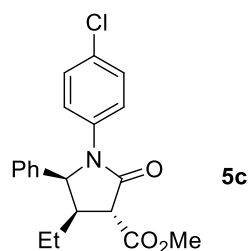

**Methyl (3*R*,4*R*,5*S*)-1-(4-chlorophenyl)-4-ethyl-2-oxo-5-phenylpyrrolidine-3-carboxylate (5c):**

Purified by flash chromatography on silica gel (petroleum ether/ethyl acetate, v:v = 5:1), amorphous white solid, mp 97–99 °C, 29.0 mg, 81% yield, >20:1 dr.  $^1H$  NMR (600 MHz,  $CDCl_3$ )  $\delta$  7.44 (d,  $J$  = 8.8 Hz, 2H), 7.36–7.30 (m, 3H), 7.19 (d,  $J$  = 8.8 Hz, 2H), 7.15 (d,  $J$  = 7.4 Hz, 2H), 5.20 (d,  $J$  = 8.1 Hz, 1H), 3.84 (s, 3H), 3.56 (d,  $J$  = 11.6 Hz, 1H), 3.18–3.12 (m, 1H), 1.24–1.19 (m, 1H), 0.92–0.86 (m, 1H), 0.83 (t,  $J$  = 7.2 Hz, 3H).  $^{13}C$  NMR (101 MHz,  $CDCl_3$ )  $\delta$  170.6, 169.8, 136.8, 136.7, 130.5, 129.2, 129.0, 128.7, 127.0, 122.8, 66.3, 54.4, 53.0, 43.8, 23.6, 12.0. HRMS (ESI-Quadrupole-Orbitrap)  $m/z$ :  $[M + H]^+$  Calcd for  $C_{20}H_{21}O_3NCl$  358.1204 (100.0%), 360.1175 (32.0%); Found 358.1200 (100.0%), 360.1172 (32.0%).  $[\alpha]_D^{22}$ : +12.7 (c 1.3,  $CHCl_3$ ); HPLC analysis: 99% ee (Chiralpak IA, 25:75  $i$ PrOH/hexanes, 1 mL/min, 254 nm),  $R_t$  (major) = 22.9 min,  $R_t$  (minor) = 79.1 min. IR (KBr thin film,  $cm^{-1}$ ):  $\nu$  2921, 2850, 1738, 1693, 1594, 1494, 1221, 837, 721, 703, 665.

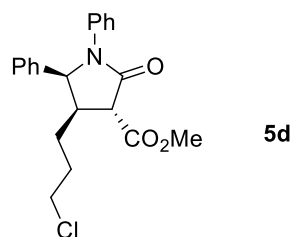

**Methyl (3*R*,4*R*,5*S*)-4-(3-chloropropyl)-2-oxo-1,5-diphenylpyrrolidine-3-carboxylate (5d):**

Purified by flash chromatography on silica gel (petroleum ether/ethyl acetate, v:v = 5:1), yellow oil, 19.5 mg, 52% yield, >20:1 dr. <sup>1</sup>H NMR (400 MHz, CDCl<sub>3</sub>) δ 7.46 (d, *J* = 7.9 Hz, 2H), 7.38–7.30 (m, 3H), 7.24–7.18 (m, 4H), 7.10–7.06 (m, 1H), 5.23 (d, *J* = 8.0 Hz, 1H), 3.86 (s, 3H), 3.59 (d, *J* = 11.7 Hz, 1H), 3.44–3.34 (m, 2H), 3.30–3.21 (m, 1H), 1.74–1.61 (m, 2H), 1.40–1.31 (m, 1H), 1.04–0.94 (m, 1H). <sup>13</sup>C NMR (101 MHz, CDCl<sub>3</sub>) δ 170.5, 169.2, 138.1, 136.8, 129.3, 129.0, 128.7, 127.1, 125.5, 121.8, 66.3, 54.4, 53.1, 44.4, 41.3, 30.4, 27.8. HRMS (ESI-Quadrupole-Orbitrap) *m/z*: [M + H]<sup>+</sup> Calcd for C<sub>21</sub>H<sub>23</sub>O<sub>3</sub>NCl 372.1361 (100.0%), 374.1331 (32.0%); Found 372.1367 (100.0%), 374.1333 (32.0%). [α]<sub>D</sub><sup>22</sup>: +25.7 (c 0.7, CHCl<sub>3</sub>); HPLC analysis: 99% ee (Chiralpak IC, 25:75 <sup>i</sup>PrOH/hexanes, 1 mL/min, 254 nm), R<sub>t</sub> (major) = 26.2 min, R<sub>t</sub> (minor) = 11.4 min. IR (KBr thin film, cm<sup>-1</sup>): ν 2924, 2855, 1740, 1697, 1498, 1260, 801, 702, 692, 509.

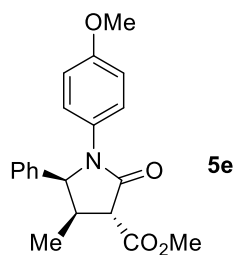

**Methyl (3*R*,4*R*,5*S*)-1-(4-methoxyphenyl)-4-methyl-2-oxo-5-phenylpyrrolidine-3-carboxylate (5e):**

Purified by flash chromatography on silica gel (petroleum ether/ethyl acetate, v:v = 5:1), amorphous white solid, mp 99–101°C, 30.7 mg, 90% yield, >20:1 dr. <sup>1</sup>H NMR (400 MHz, CDCl<sub>3</sub>) δ 7.38–7.30 (m, 5H), 7.16–7.14 (m, 2H), 6.78–6.74 (m, 2H), 5.12 (d, *J* = 8.0 Hz, 1H), 3.84 (s, 3H), 3.72 (s, 3H), 3.47 (d, *J* = 11.6 Hz, 1H), 3.33–3.23 (m, 1H), 0.74 (d, *J* = 6.9 Hz, 3H). <sup>13</sup>C NMR (101 MHz, CDCl<sub>3</sub>) δ 170.1, 169.3, 157.0, 136.8, 131.4, 129.1, 128.4, 127.0, 123.4, 114.1, 67.1, 55.5, 55.1, 52.9, 36.9, 15.1. HRMS (ESI-Quadrupole-Orbitrap) *m/z*: [M + Na]<sup>+</sup> Calcd for C<sub>20</sub>H<sub>21</sub>O<sub>4</sub>NNa 362.1362; Found 362.1361. [α]<sub>D</sub><sup>22</sup>: +33.0 (c 0.2, CHCl<sub>3</sub>); HPLC analysis: 99% ee (Chiralcel OD-H, 15:85 <sup>i</sup>PrOH/hexanes, 1 mL/min, 254 nm), R<sub>t</sub> (major) = 19.2 min, R<sub>t</sub> (minor) = 16.3 min. IR (KBr thin film, cm<sup>-1</sup>): ν 2960, 2920, 1738, 1683, 1515, 1254, 836, 782, 730, 525.

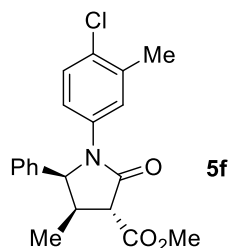

**Methyl** **(3R,4R,5S)-1-(4-chloro-3-methylphenyl)-4-methyl-2-oxo-5-phenylpyrrolidine-3-carboxylate (5f):**

Purified by flash chromatography on silica gel (petroleum ether/ethyl acetate, v:v = 5:1), yellow oil, 31.8 mg, 89% yield, >20:1 dr. <sup>1</sup>H NMR (400 MHz, CDCl<sub>3</sub>) δ 7.56 (d, *J* = 2.5 Hz, 1H), 7.38–7.31 (m, 3H), 7.17–7.11 (m, 4H), 5.15 (d, *J* = 8.0 Hz, 1H), 3.84 (s, 3H), 3.46 (d, *J* = 11.8 Hz, 1H), 3.31–3.21 (m, 1H), 2.27 (s, 3H), 0.75 (d, *J* = 6.9 Hz, 3H). <sup>13</sup>C NMR (101 MHz, CDCl<sub>3</sub>) δ 169.8, 169.6, 136.8, 136.7, 136.4, 130.8, 129.3, 129.2, 128.6, 126.8, 124.0, 120.0, 66.6, 55.2, 53.0, 36.8, 20.5, 15.0. HRMS (ESI-Quadrupole-Orbitrap) *m/z*: [M + H]<sup>+</sup> Calcd for C<sub>20</sub>H<sub>21</sub>O<sub>3</sub>NCI 358.1204 (100.0%), 360.1175 (32.0%); Found 358.1207 (100.0%), 360.1176 (32.0%). [α]<sub>D</sub><sup>22</sup>: +40.0 (c 0.1, CHCl<sub>3</sub>); HPLC analysis: 99% ee (Chiralcel OD-H, 10:90 <sup>i</sup>PrOH/hexanes, 1 mL/min, 254 nm), R<sub>t</sub> (major) = 6.3 min, R<sub>t</sub> (minor) = 7.7 min. IR (KBr thin film, cm<sup>-1</sup>): ν 2919, 2849, 1740, 1680, 1483, 1388, 1259, 811, 698, 611.

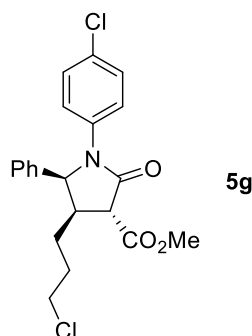

**Dethyl** **(3R,4R,5S)-1-(4-chlorophenyl)-4-(3-chloropropyl)-2-oxo-5-phenylpyrrolidine-3-carboxylate (5g):**

Purified by flash chromatography on silica gel (petroleum ether/ethyl acetate, v:v = 5:1), yellow oil, 24.8 mg, 61% yield, >20:1 dr. <sup>1</sup>H NMR (400 MHz, CDCl<sub>3</sub>) δ 7.44–7.33 (m, 5H), 7.20–7.15 (m, 4H), 5.20 (d, *J* = 8.0 Hz, 1H), 3.86 (s, 3H), 3.58 (d, *J* = 11.7 Hz, 1H), 3.44–3.34 (m, 2H), 3.29–3.20 (m, 1H), 1.75–1.61 (m, 2H), 1.40–1.31

(m, 1H), 1.03–0.94 (m, 1H).  $^{13}\text{C}$  NMR (101 MHz,  $\text{CDCl}_3$ ) 170.3, 169.3, 136.7, 136.3, 130.7, 129.4, 129.0, 128.9, 127.0, 122.8, 66.1, 54.3, 53.2, 44.3, 41.2, 30.3, 27.8. HRMS (ESI-Quadrupole-Orbitrap)  $m/z$ :  $[\text{M} + \text{H}]^+$  Calcd for  $\text{C}_{21}\text{H}_{22}\text{O}_3\text{Cl}_2\text{N}$  406.0971 (100.0%), 408.0942 (63.9%); Found 406.0974 (100.0%), 408.0946 (63.9%).  $[\alpha]_{\text{D}}^{22}$ : +26.9 (c 0.5,  $\text{CHCl}_3$ ); HPLC analysis: 99% ee (Chiralpak IC, 25:75  $i$ PrOH/hexanes, 1 mL/min, 254 nm),  $R_t$  (major) = 12.3 min,  $R_t$  (minor) = 8.1 min. IR (KBr thin film,  $\text{cm}^{-1}$ ):  $\nu$  2924, 2854, 1740, 1698, 1494, 1456, 1260, 800, 760, 660, 510.

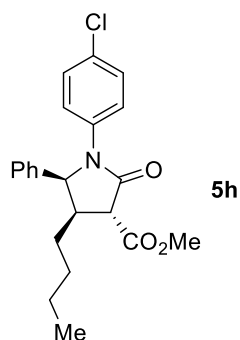

**Methyl (3*R*,4*R*,5*S*)-4-butyl-1-(4-chlorophenyl)-2-oxo-5-phenylpyrrolidine-3-carboxylate (5h):**

Purified by flash chromatography on silica gel (petroleum ether/ethyl acetate, v:v = 5:1), yellow oil, 31.9 mg, 83% yield, >20:1 dr.  $^1\text{H}$  NMR (400 MHz,  $\text{CDCl}_3$ )  $\delta$  7.45–7.42 (m, 2H), 7.37–7.31 (m, 3H), 7.20–7.17 (m, 2H), 7.17–7.14 (m, 2H), 5.18 (d,  $J$  = 8.0 Hz, 1H), 3.84 (s, 3H), 3.56 (d,  $J$  = 11.8 Hz, 1H), 3.25–3.17 (m, 1H), 1.24–1.09 (m, 5H), 0.91–0.85 (m, 1H), 0.78 (t,  $J$  = 6.7 Hz, 3H).  $^{13}\text{C}$  NMR (101 MHz,  $\text{CDCl}_3$ )  $\delta$  170.5, 169.8, 136.8, 136.7, 130.5, 129.2, 129.0, 128.7, 127.0, 122.8, 66.3, 54.5, 53.0, 42.0, 30.0, 29.6, 22.6, 13.9. HRMS (ESI-Quadrupole-Orbitrap)  $m/z$ :  $[\text{M} + \text{H}]^+$  Calcd for  $\text{C}_{22}\text{H}_{25}\text{O}_3\text{NCl}$  386.1517 (100.0%), 388.1488 (32.0%); Found 386.1512 (100.0%), 388.1480 (32.0%).  $[\alpha]_{\text{D}}^{22}$ : +23.7 (c 1.6,  $\text{CHCl}_3$ ); HPLC analysis: 99% ee (Chiralpak IA, 25:75  $i$ PrOH/hexanes, 1 mL/min, 254 nm),  $R_t$  (major) = 24.4 min,  $R_t$  (minor) = 5.5 min. IR (KBr thin film,  $\text{cm}^{-1}$ ):  $\nu$  2928, 2859, 1741, 1697, 1494, 1264, 829, 733, 701, 671.

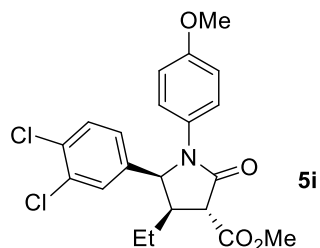

**Methyl (3*R*,4*R*,5*S*)-5-(3,4-dichlorophenyl)-4-ethyl-1-(4-methoxyphenyl)-2-oxopyrrolidine-3-carboxylate (5i):**

Purified by flash chromatography on silica gel (petroleum ether/ethyl acetate, v:v = 5:1), amorphous white solid, mp 130–133°C, 33.7 mg, 80% yield, >20:1 dr. <sup>1</sup>H NMR (600 MHz, CDCl<sub>3</sub>) δ 7.41 (d, *J* = 8.3 Hz, 1H), 7.29–7.26 (m, 3H), 7.00 (dd, *J* = 8.3, 1.7 Hz, 1H), 6.78 (d, *J* = 9.1 Hz, 2H), 5.13 (d, *J* = 8.2 Hz, 1H), 3.84 (s, 3H), 3.73 (s, 3H), 3.51 (d, *J* = 11.4 Hz, 1H), 3.20–3.15 (m, 1H), 1.23–1.17 (m, 1H), 0.96–0.88 (m, 1H), 0.84 (t, *J* = 7.3 Hz, 3H). <sup>13</sup>C NMR (101 MHz, CDCl<sub>3</sub>) δ 170.5, 169.1, 157.4, 137.8, 133.5, 132.7, 131.1, 130.6, 129.2, 126.5, 123.9, 114.3, 65.9, 55.5, 54.0, 53.1, 43.4, 23.9, 12.1. HRMS (ESI-Quadrupole-Orbitrap) *m/z*: [M + H]<sup>+</sup> Calcd for C<sub>21</sub>H<sub>22</sub>O<sub>4</sub>NCl<sub>2</sub> 422.0920 (100.0%), 424.0891 (63.9%); Found 422.0925 (100.0%), 424.0890 (63.9%). [α]<sub>D</sub><sup>22</sup>: +9.3 (c 0.5, CHCl<sub>3</sub>); HPLC analysis: 99% ee (Chiralpak IA, 25:75 <sup>i</sup>PrOH/hexanes, 1 mL/min, 254 nm), R<sub>t</sub> (major) = 13.2 min, R<sub>t</sub> (minor) = 9.1 min. IR (KBr thin film, cm<sup>-1</sup>): ν 2926, 1741, 1690, 1512, 1470, 1248, 830, 735, 701, 674.

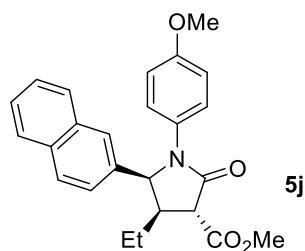

**Methyl (3*R*,4*R*,5*S*)-4-ethyl-1-(4-methoxyphenyl)-5-(naphthalen-2-yl)-2-oxopyrrolidine-3-carboxylate (5j):**

Purified by flash chromatography on silica gel (petroleum ether/ethyl acetate, v:v = 5:1), amorphous white solid, mp 140–143°C, 30.4 mg, 75% yield, >20:1 dr. <sup>1</sup>H NMR (600 MHz, CDCl<sub>3</sub>) δ 7.84–7.82 (m, 2H), 7.80–7.78 (m, 1H), 7.63 (s, 1H), 7.51–7.48

(m, 2H), 7.36–7.35 (m, 2H), 7.28 (d,  $J = 8.5$  Hz, 1H), 6.72 (d,  $J = 9.1$  Hz, 2H), 5.32 (d,  $J = 8.2$  Hz, 1H), 3.86 (s, 3H), 3.69 (s, 3H), 3.66 (d,  $J = 11.6$  Hz, 1H), 3.27–3.22 (m, 1H), 1.25–1.20 (m, 1H), 0.92–0.86 (m, 1H), 0.82 (t,  $J = 7.3$  Hz, 3H).  $^{13}\text{C}$  NMR (101 MHz,  $\text{CDCl}_3$ )  $\delta$  170.9, 169.5, 157.2, 134.9, 133.33, 133.26, 131.2, 129.0, 128.0, 127.9, 126.8, 126.5, 123.8, 114.1, 67.1, 55.4, 54.4, 53.0, 44.0, 23.8, 12.1. HRMS (ESI-Quadrupole-Orbitrap)  $m/z$ :  $[\text{M} + \text{Na}]^+$  Calcd for  $\text{C}_{25}\text{H}_{25}\text{O}_4\text{NNa}$  Calculated 426.1676; Found 426.1675.  $[\alpha]_{\text{D}}^{22}$ : +8.2 (c 0.4,  $\text{CHCl}_3$ ); HPLC analysis: 99% ee (Chiralpak IA, 25:75  $i$ PrOH/hexanes, 1 mL/min, 254 nm),  $R_t$  (major) = 24.9 min,  $R_t$  (minor) = 11.3 min. IR (KBr thin film,  $\text{cm}^{-1}$ ):  $\nu$  2925, 2854, 1729, 1682, 1513, 1432, 1242, 841, 780, 650.

# NMR Spectra of New Compounds

SSY260121-D-Et  
single\_pulse

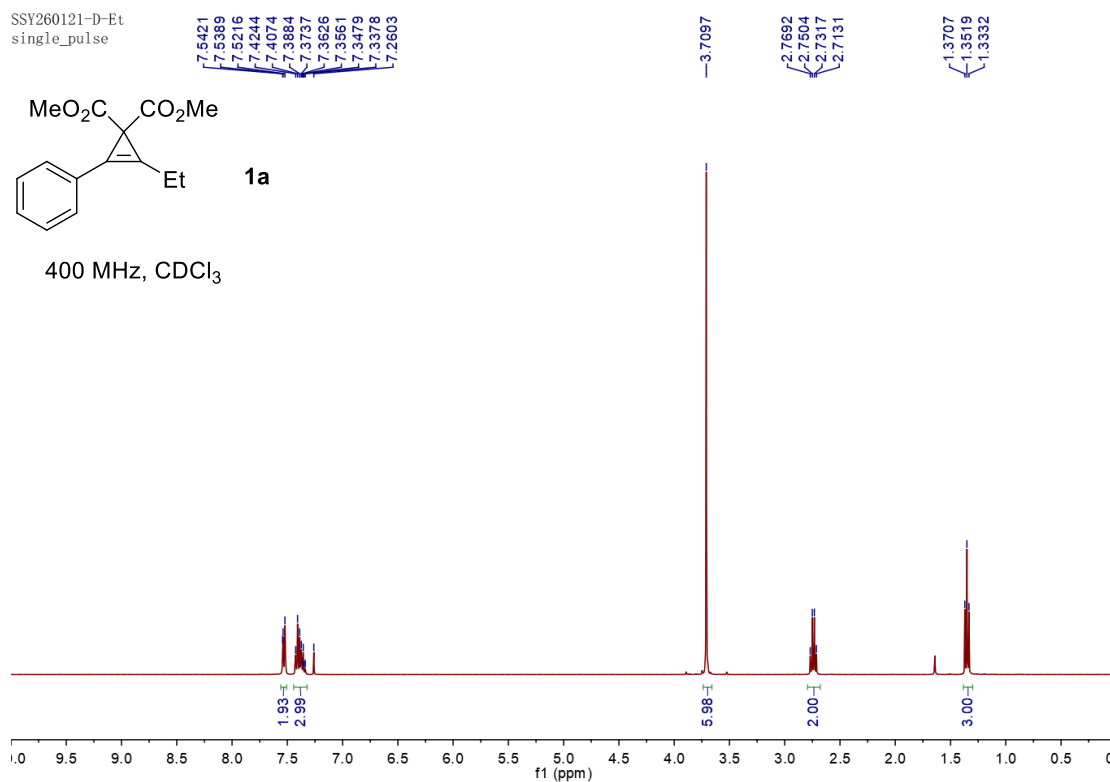

SSY260121-D-Et  
single pulse decoupled gated

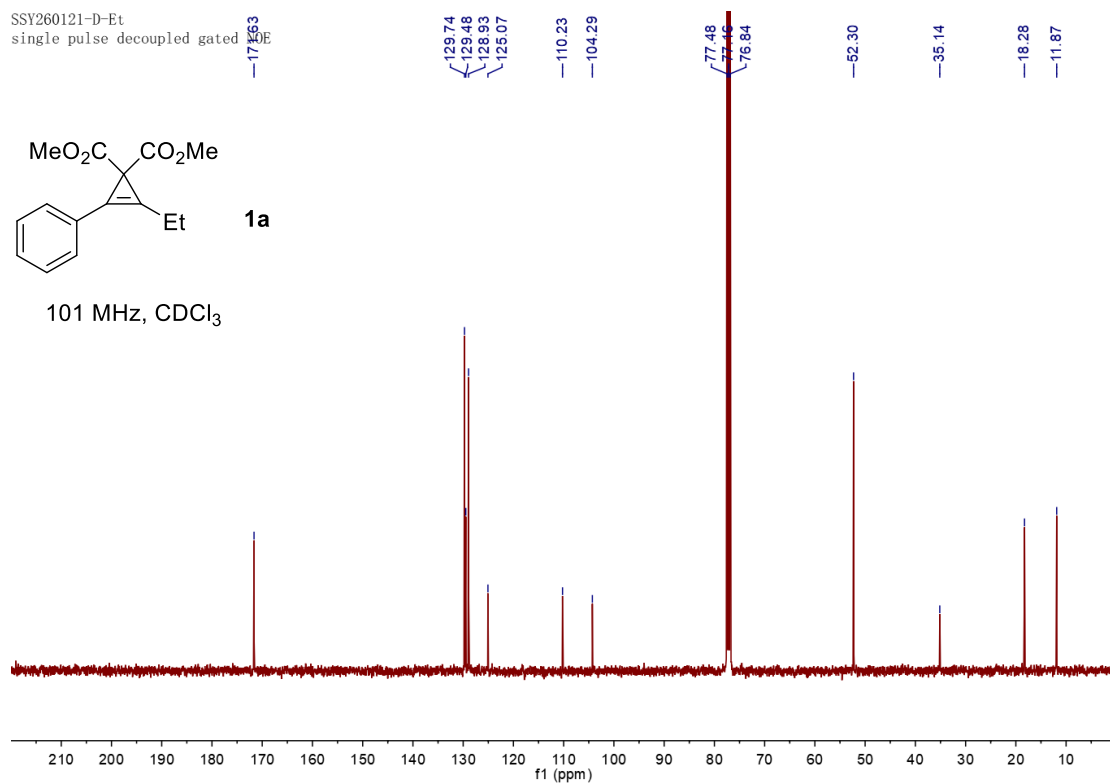

SSY250515-D1

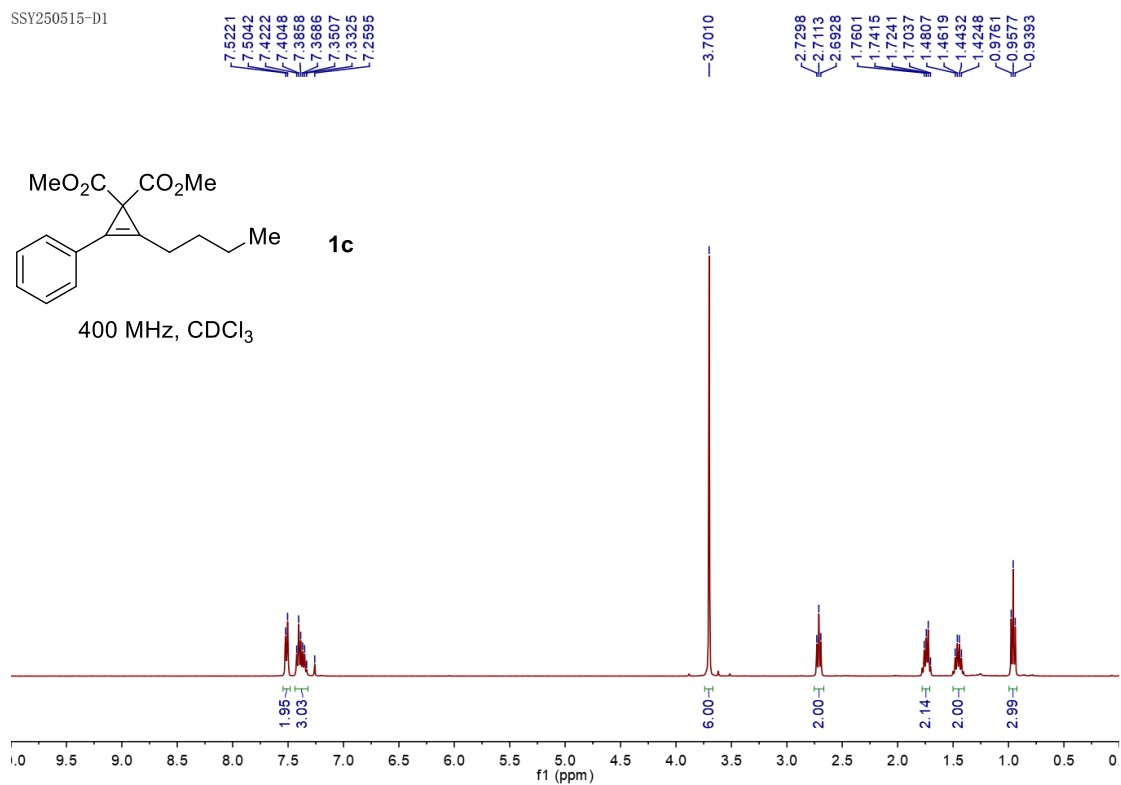

ssy250515-D1-C

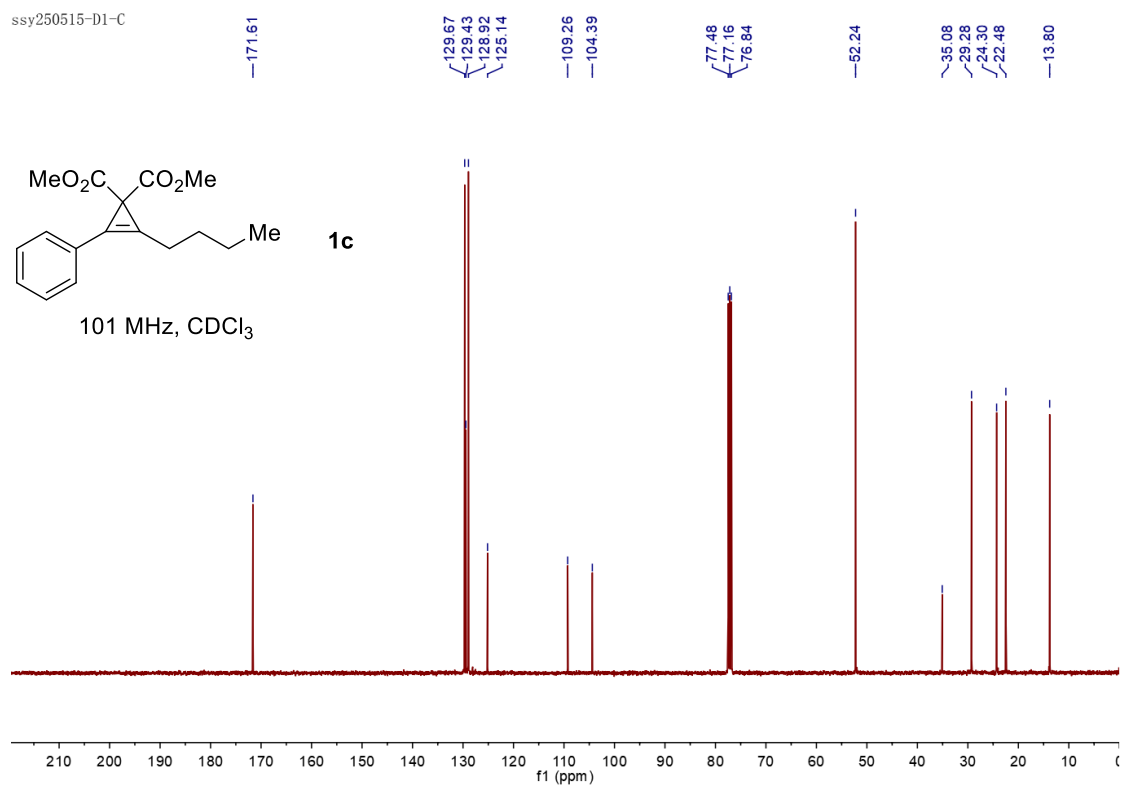

SSY250523-D-C1  
single\_pulse

7.5440  
7.5406  
7.5246  
7.4482  
7.4440  
7.4275  
7.4084  
7.4005  
7.3824  
7.2663  
7.2602

3.7182  
3.6768  
3.6655  
3.6610  
3.6500  
3.6462  
2.9489  
2.9312  
2.9135  
2.2484  
2.2318  
2.2150  
2.1984  
2.1813

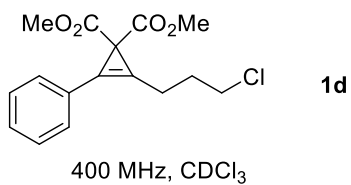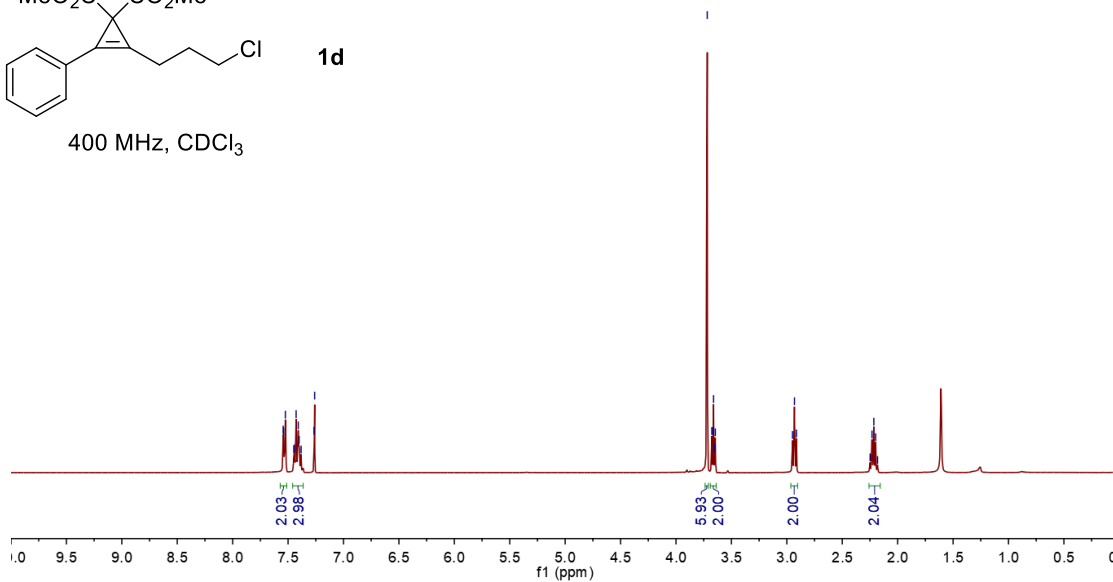

ssy250524-D-C1-C

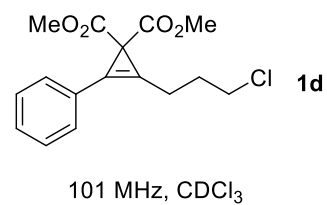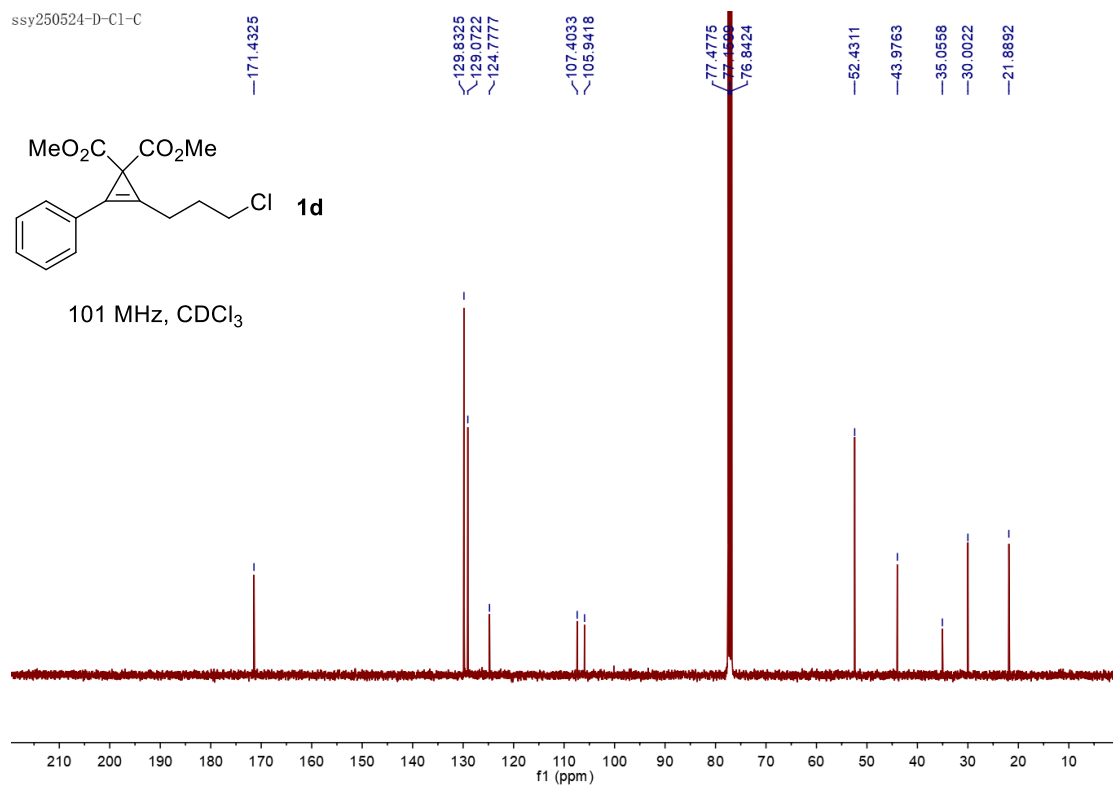

SSY251014-D-YX  
single\_pulse

7.5341  
7.5166  
7.4358  
7.4192  
7.4003  
7.3909  
7.3735  
7.2595

4.1983  
4.1825  
4.1666

3.7155

2.8359  
2.8173  
2.7987  
2.1381  
2.1210  
2.1036  
2.0865  
2.0690  
2.0521

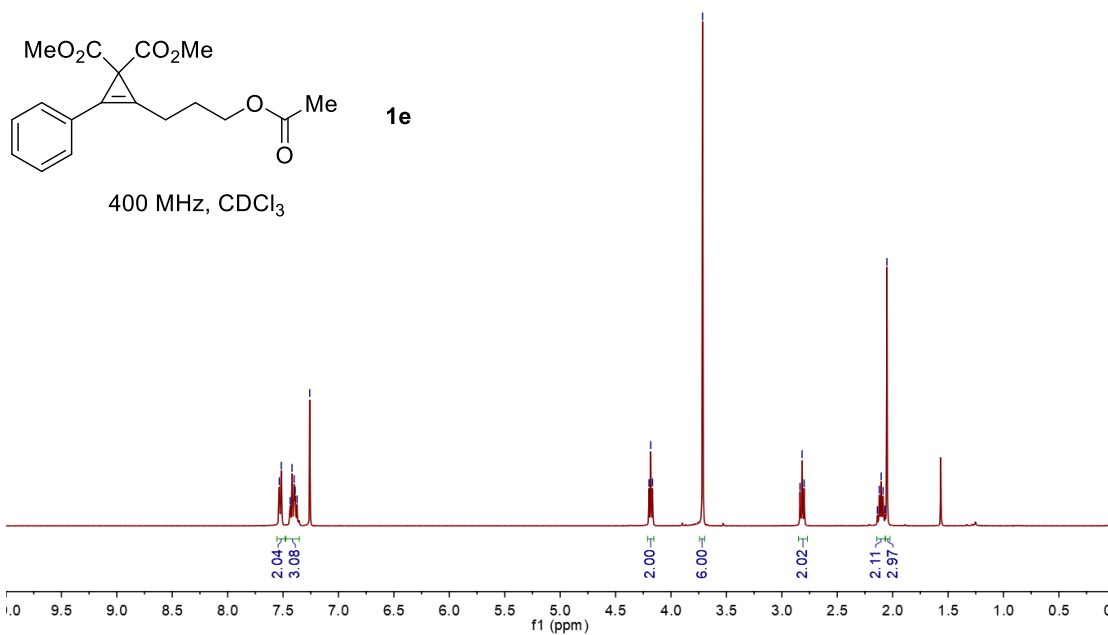

SSY251012-D-YX-C-5h  
single pulse decoupled gated

177.45  
176.21

129.82  
129.76  
129.03  
124.84

107.90  
105.47

77.37  
77.16  
76.95

63.57

62.40

35.11

26.51  
21.50  
21.07

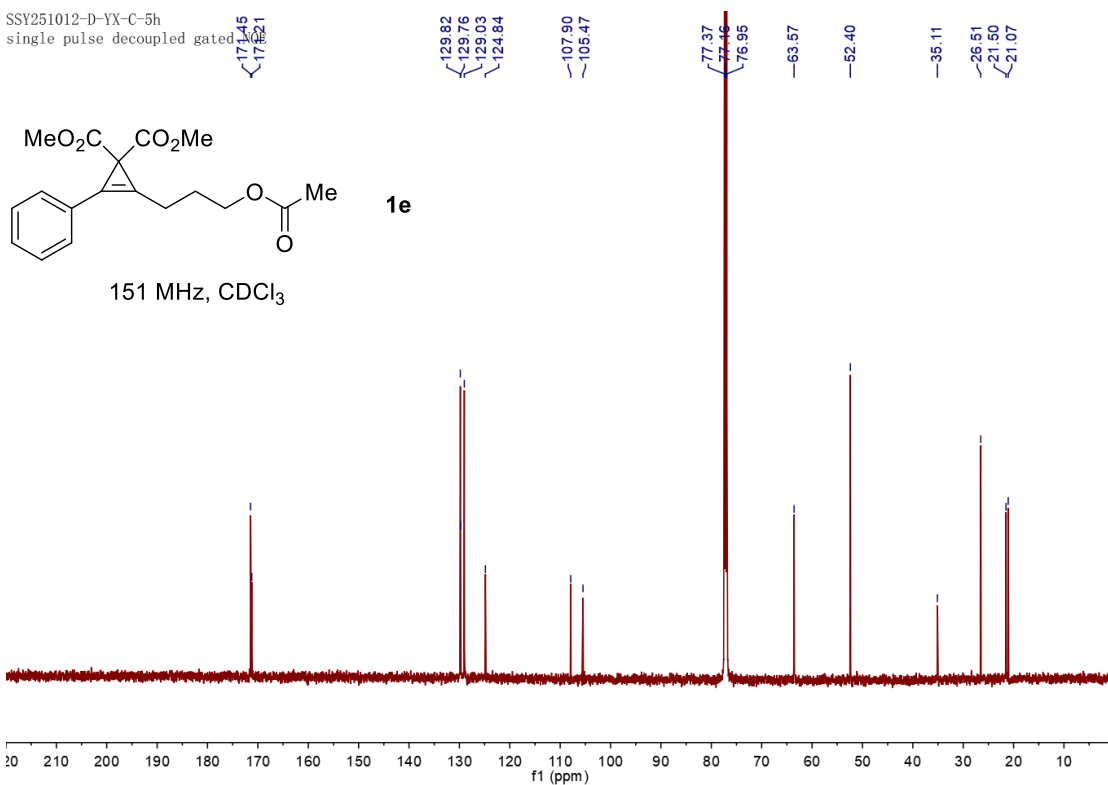

SSY260107-D-Br

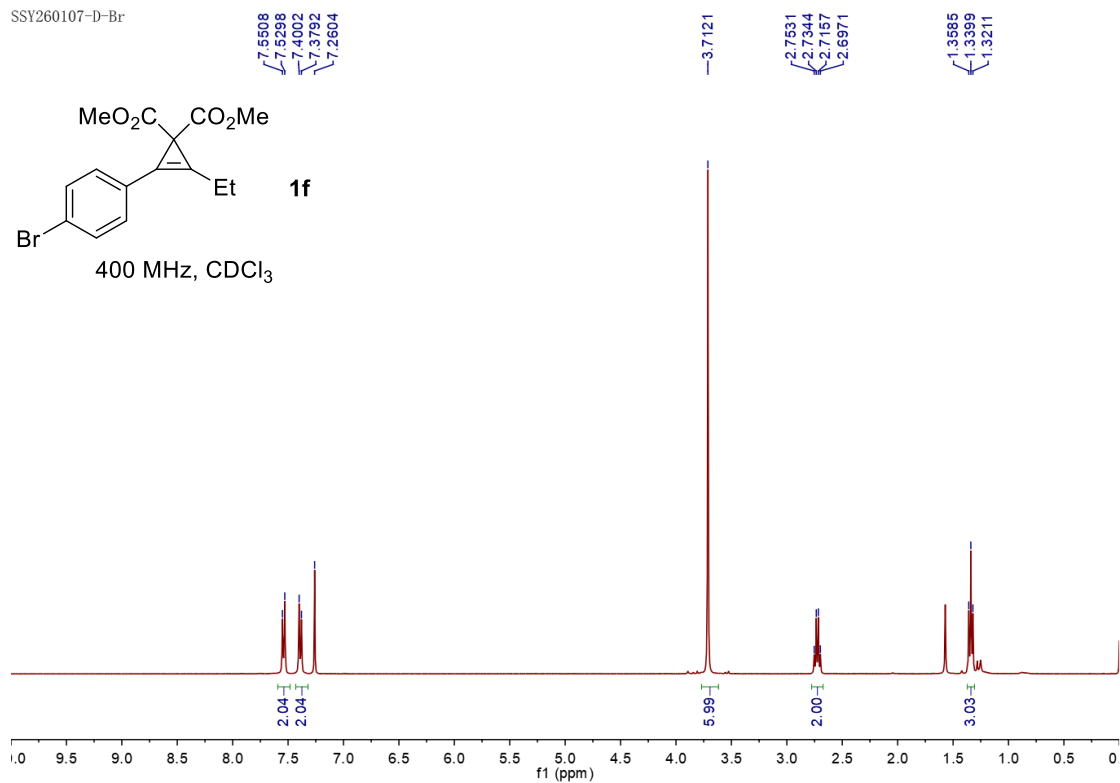

SSY-260108-D-BR

single pulse decoupled gated NMR

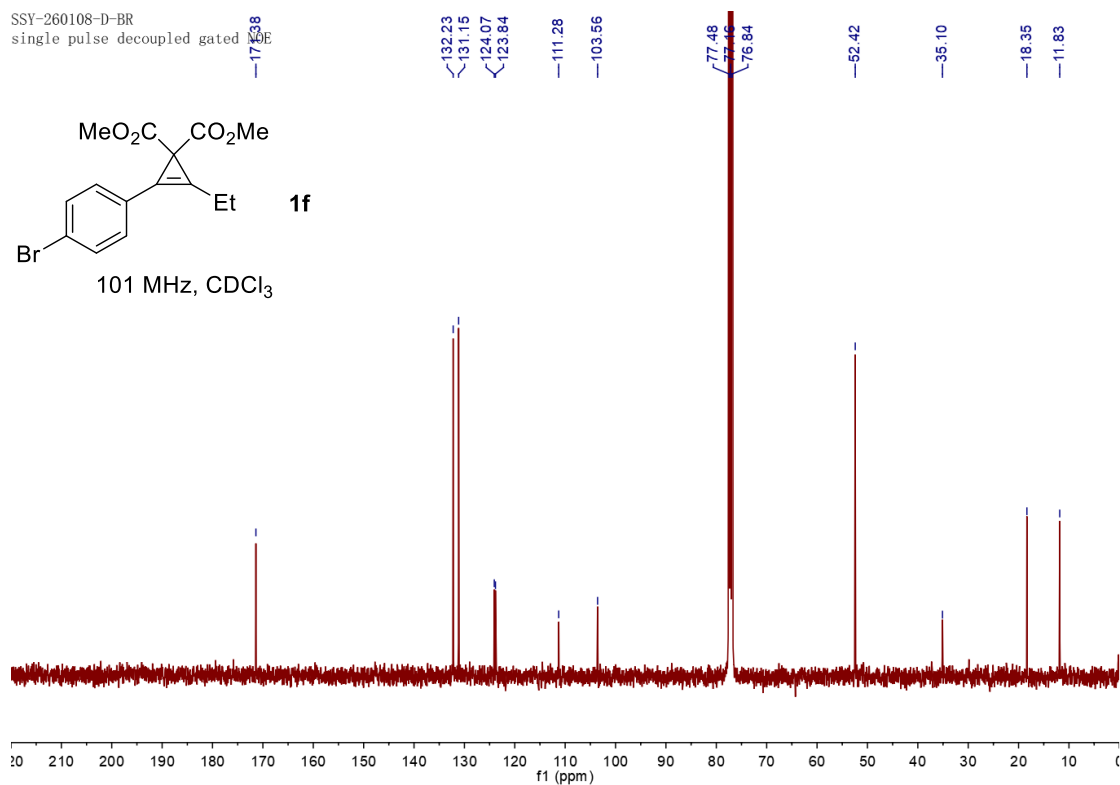

SSY251010-69

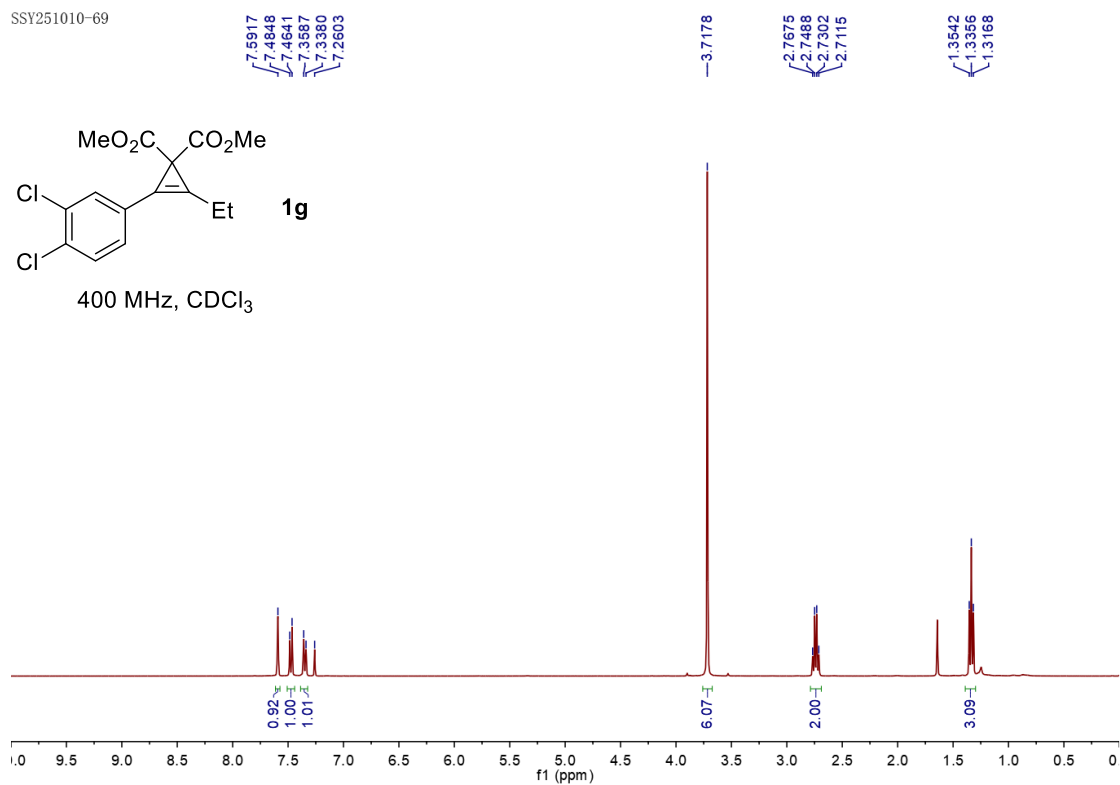

SSY251011-D-2C1

single pulse decoupled gated NMR

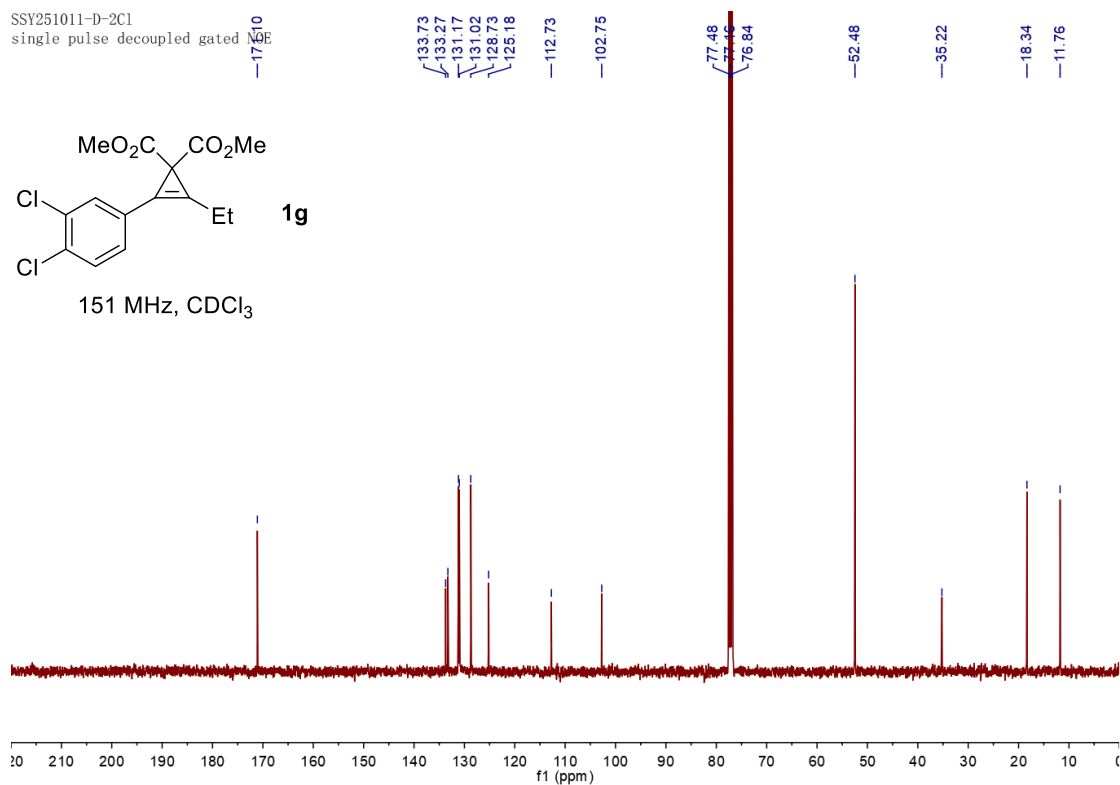

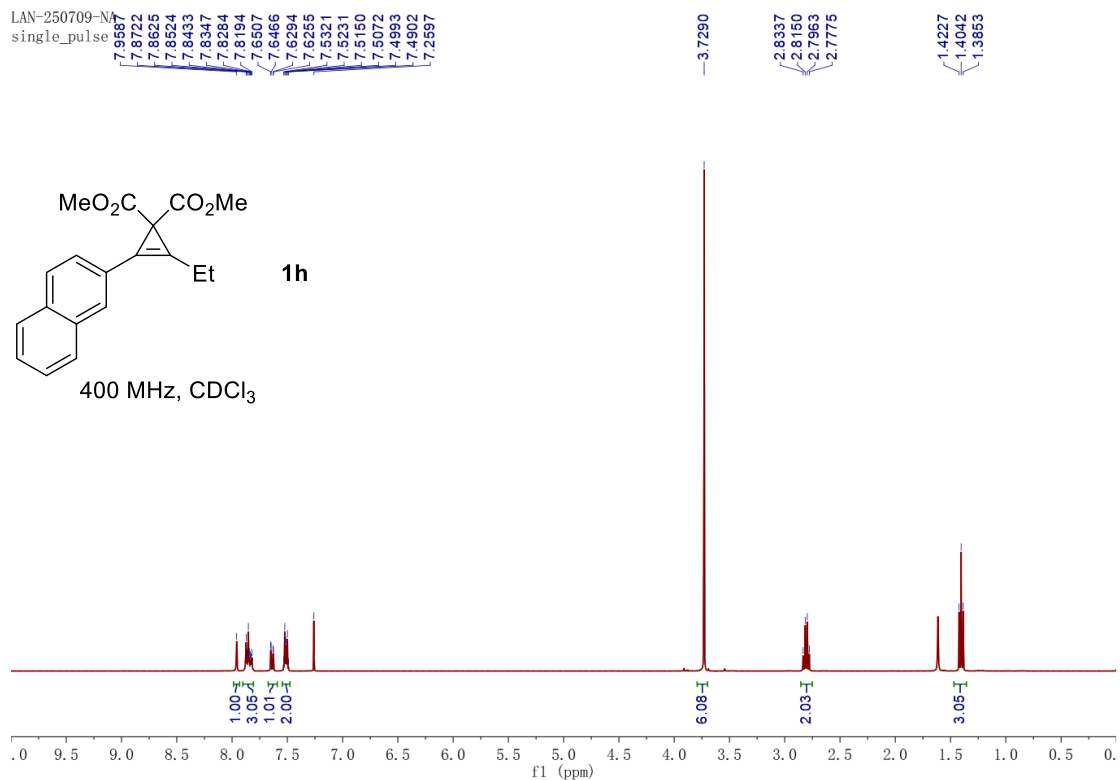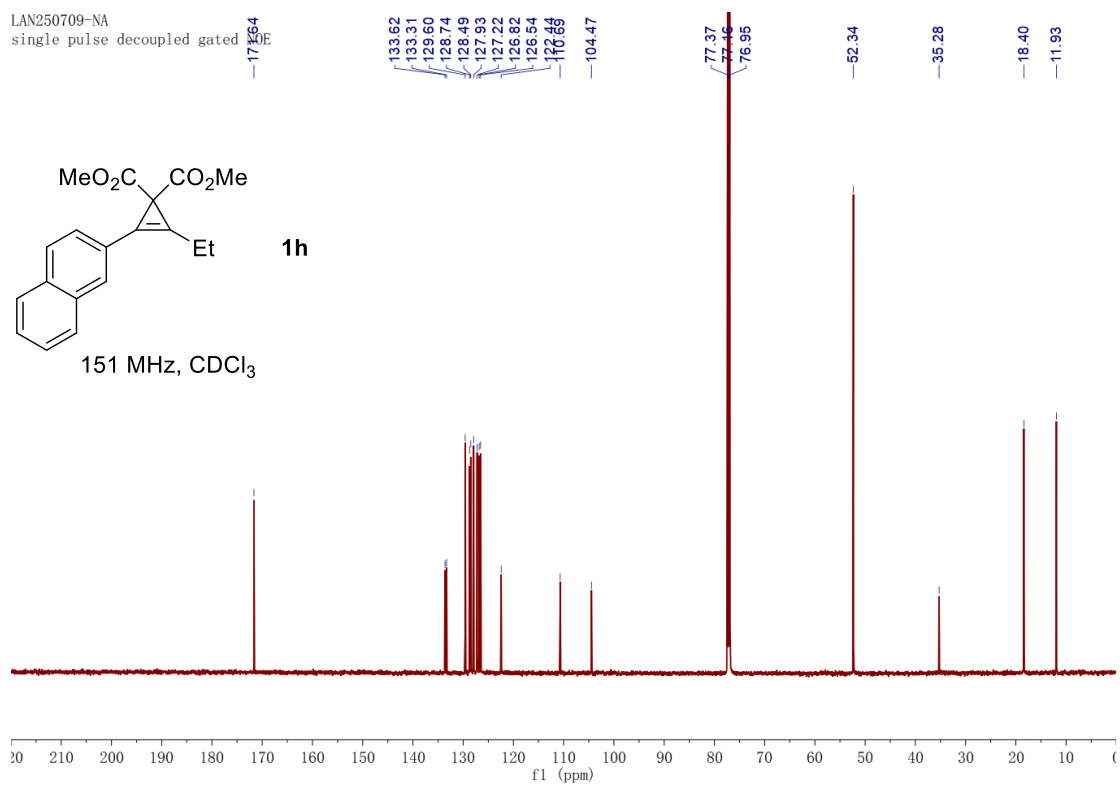

lan251130-SF-1

7.5085  
7.5060  
7.5013  
7.4886  
7.3571  
7.3520  
7.3445  
7.2600  
7.2584  
7.2553  
7.2456  
7.2427

3.7105

2.7144  
2.6957  
2.6770  
2.6583

1.3395  
1.3208  
1.3021

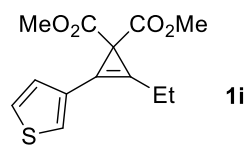

400 MHz, CDCl<sub>3</sub>

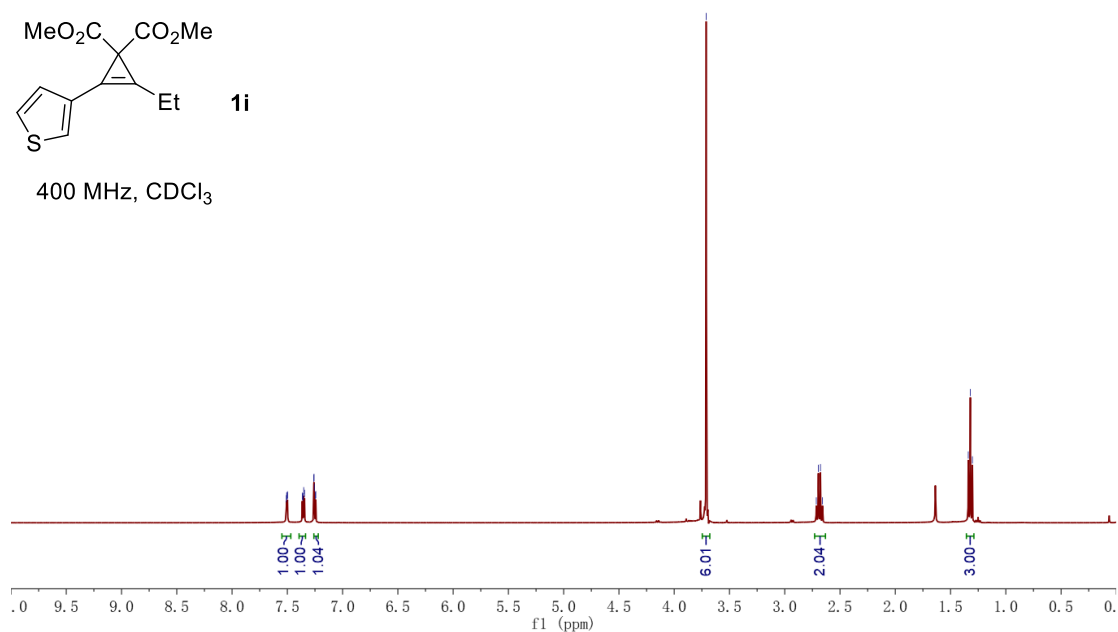

lan251130-SF-1

171.56

128.12  
127.59  
126.79  
126.01

107.56

99.58

77.46  
77.46  
76.84

52.32

35.24

18.13

11.73

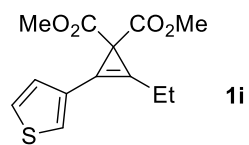

101 MHz, CDCl<sub>3</sub>

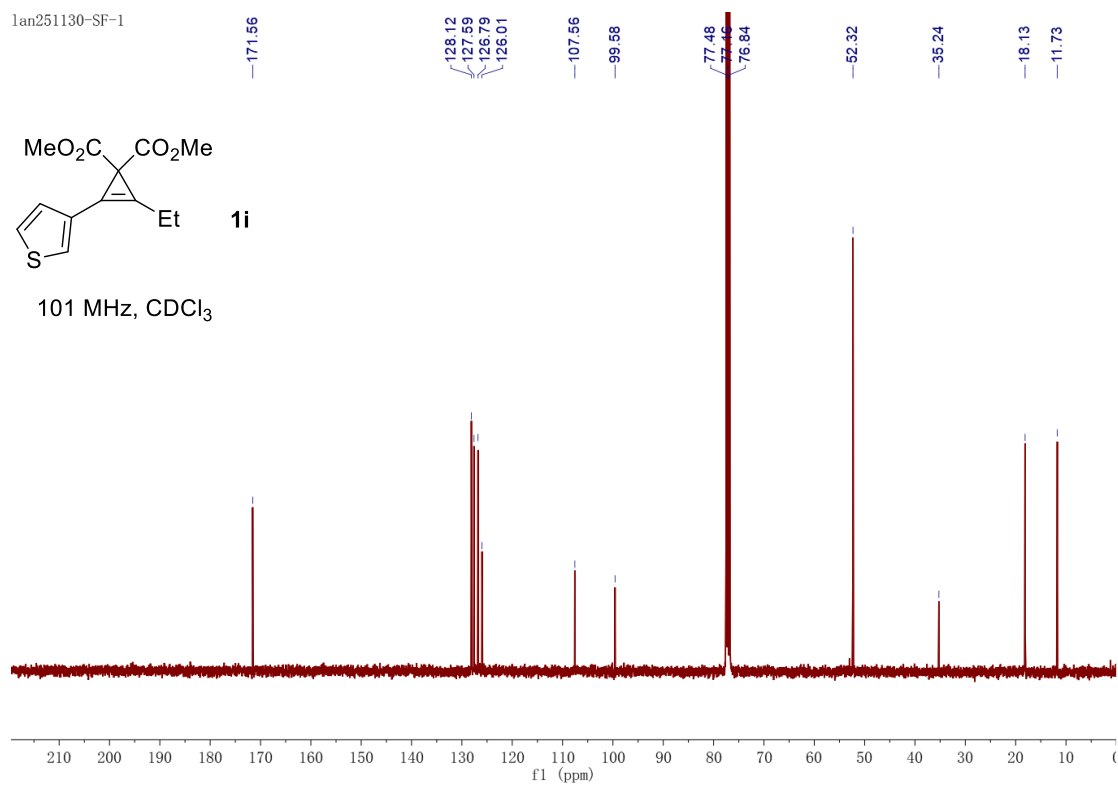

ssy-250623-d-ch3

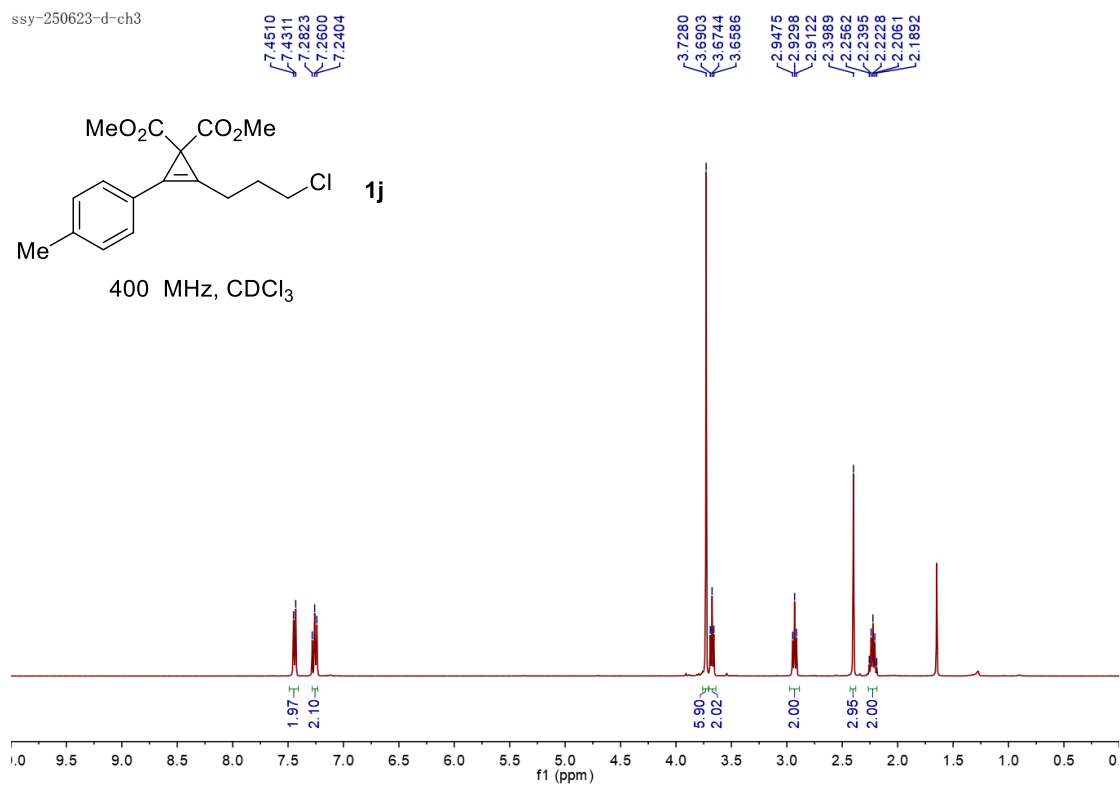

SSY250624-D-CH3-C  
single pulse decoupled gated

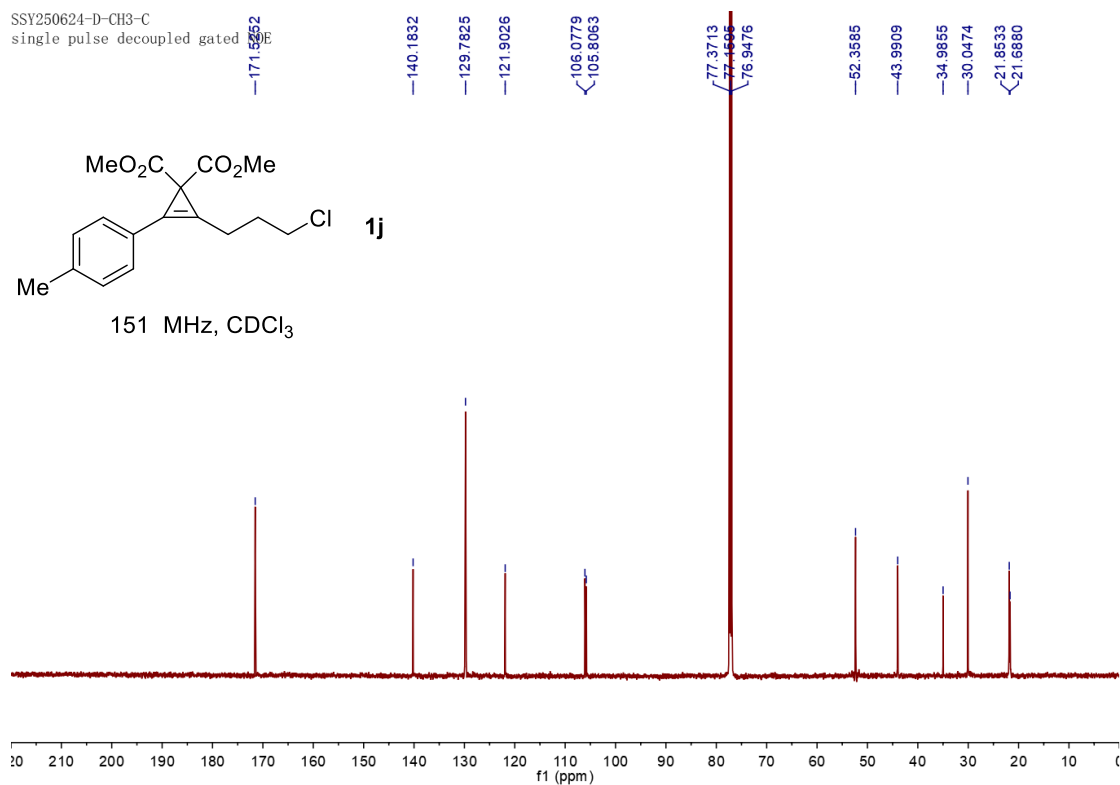

LAN251005-OME-SM1

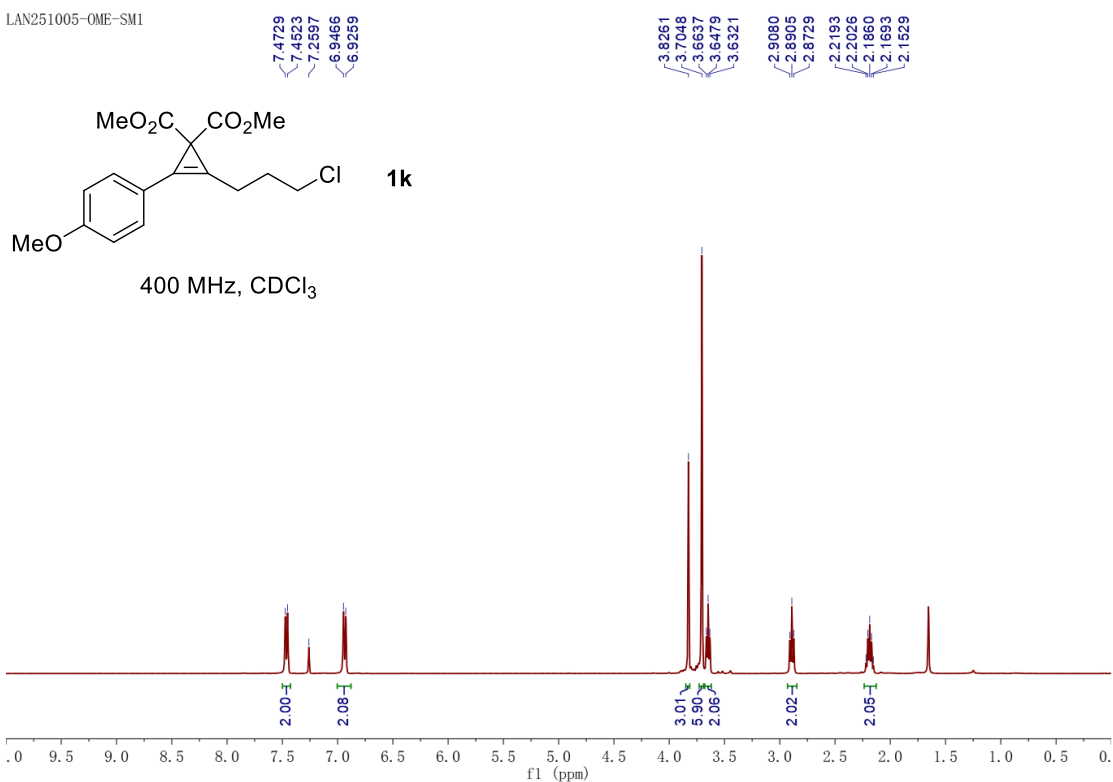

lan251004-ome-sm 1  
single pulse decoupled gated

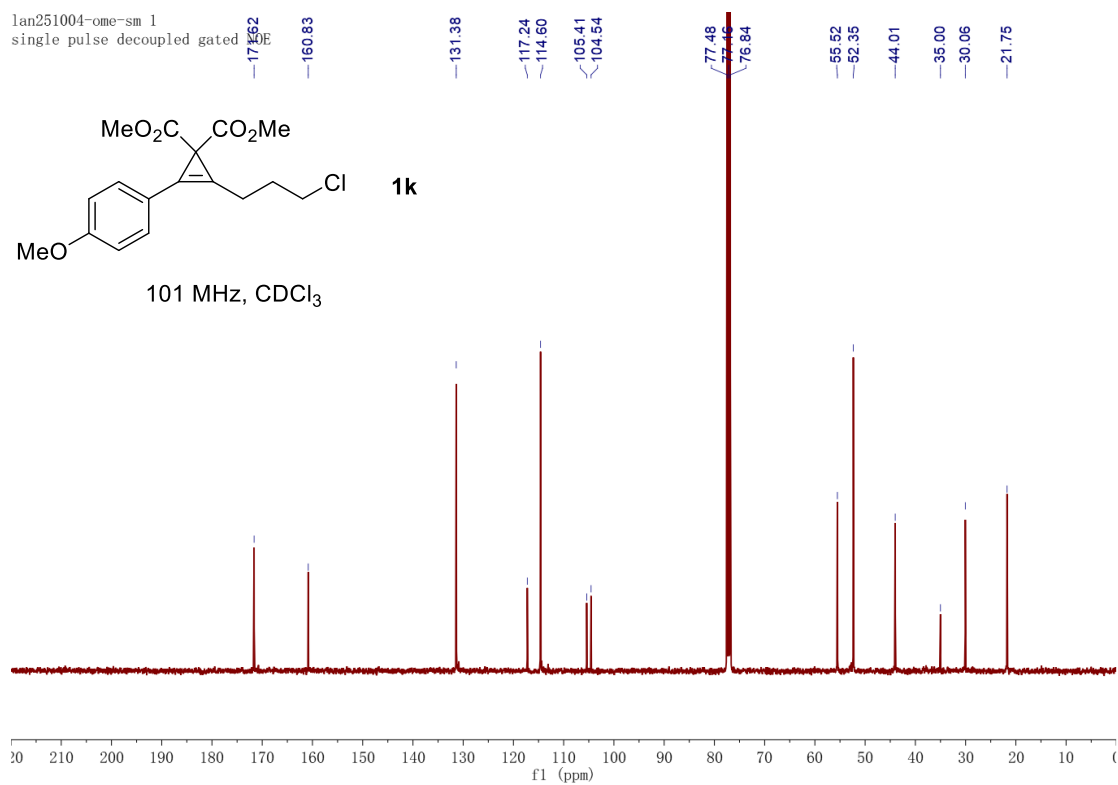

lan250627-D-F  
single\_pulse

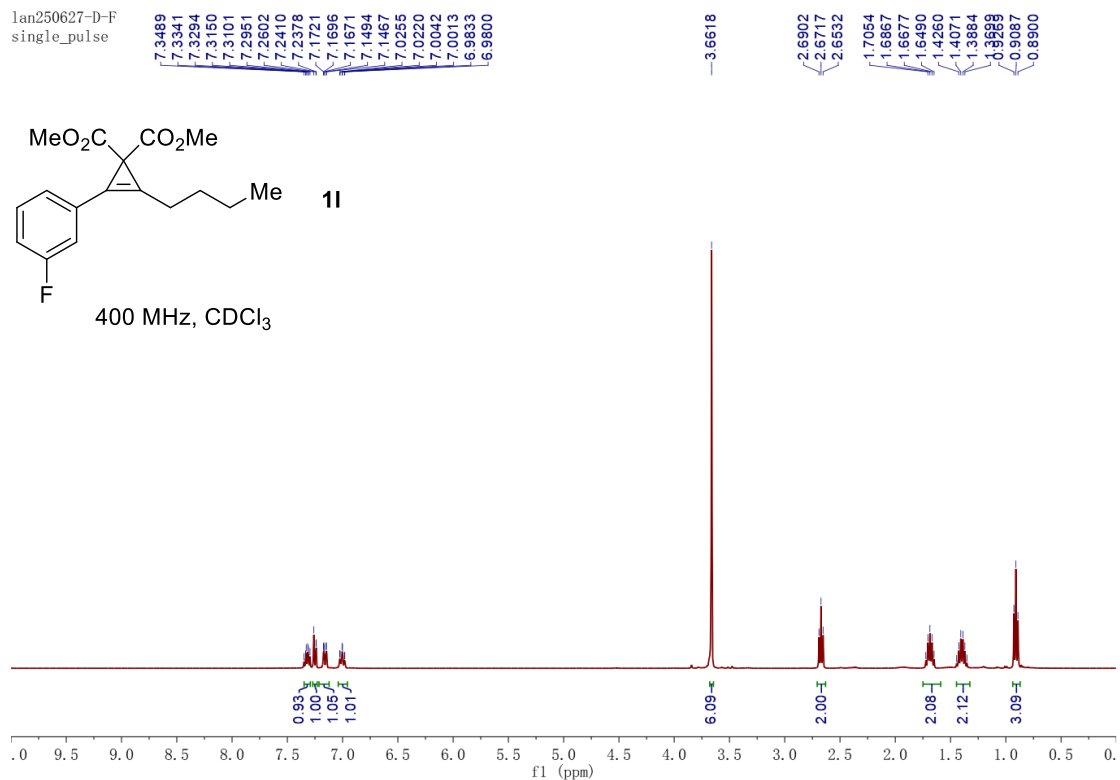

lan250627-D-F  
single pulse decoupled gated

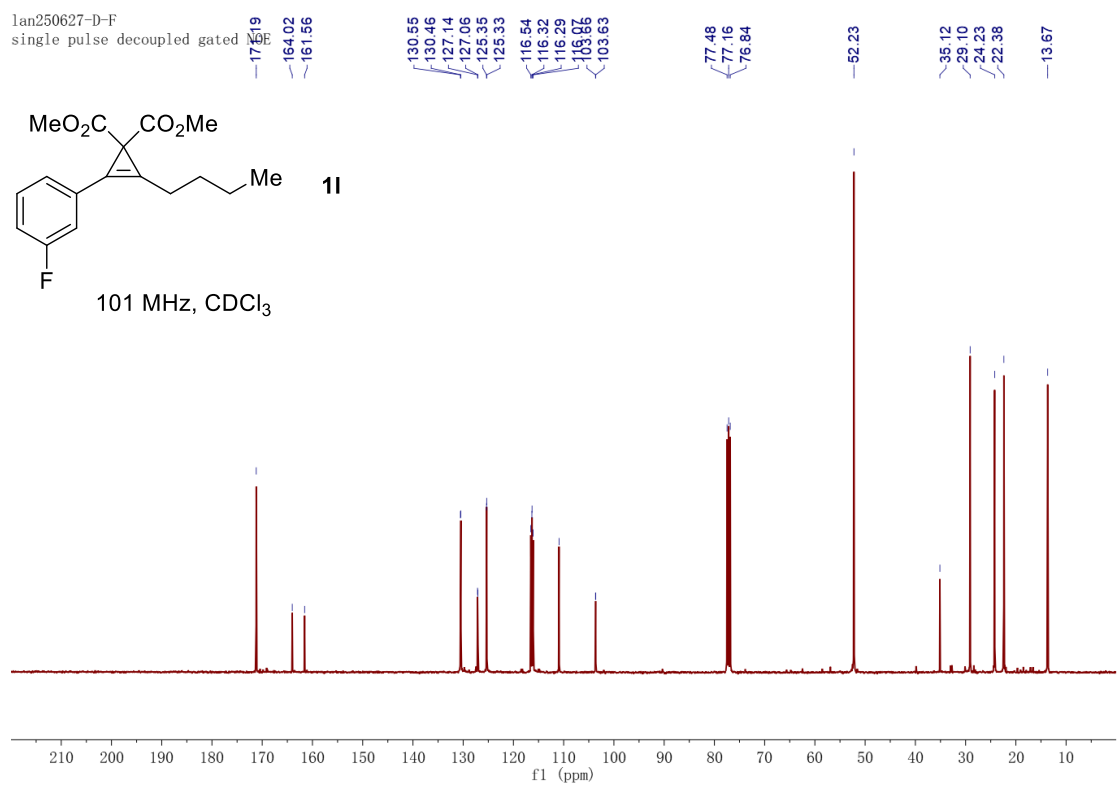

lan250627-D-F  
single\_pulse

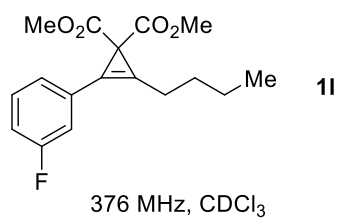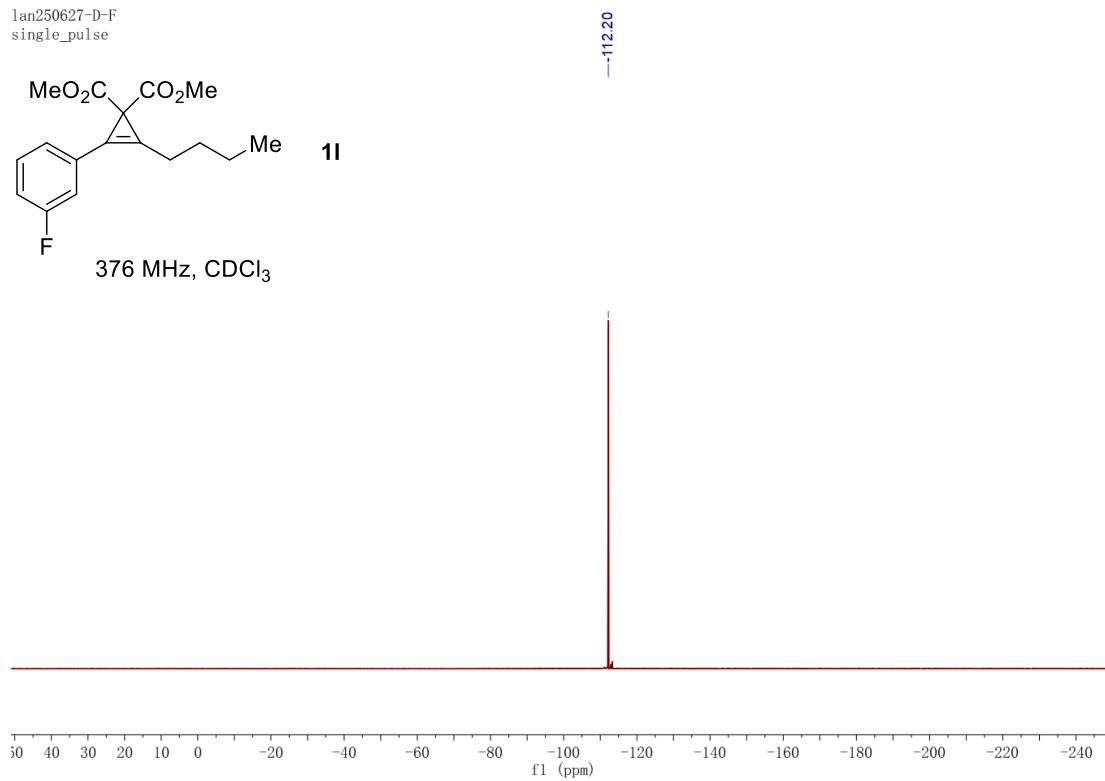

LAN251120-BH-S  
single\_pulse

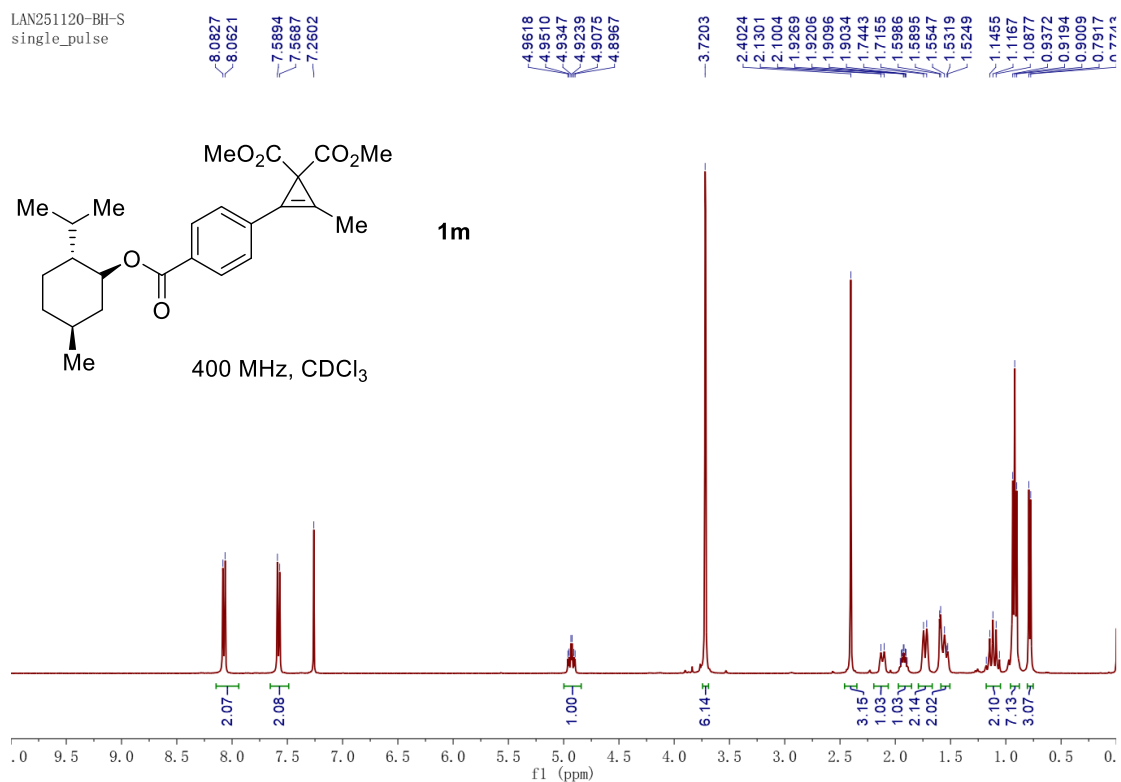

LAN251121-BH-5  
single\_pulse decoupled gated

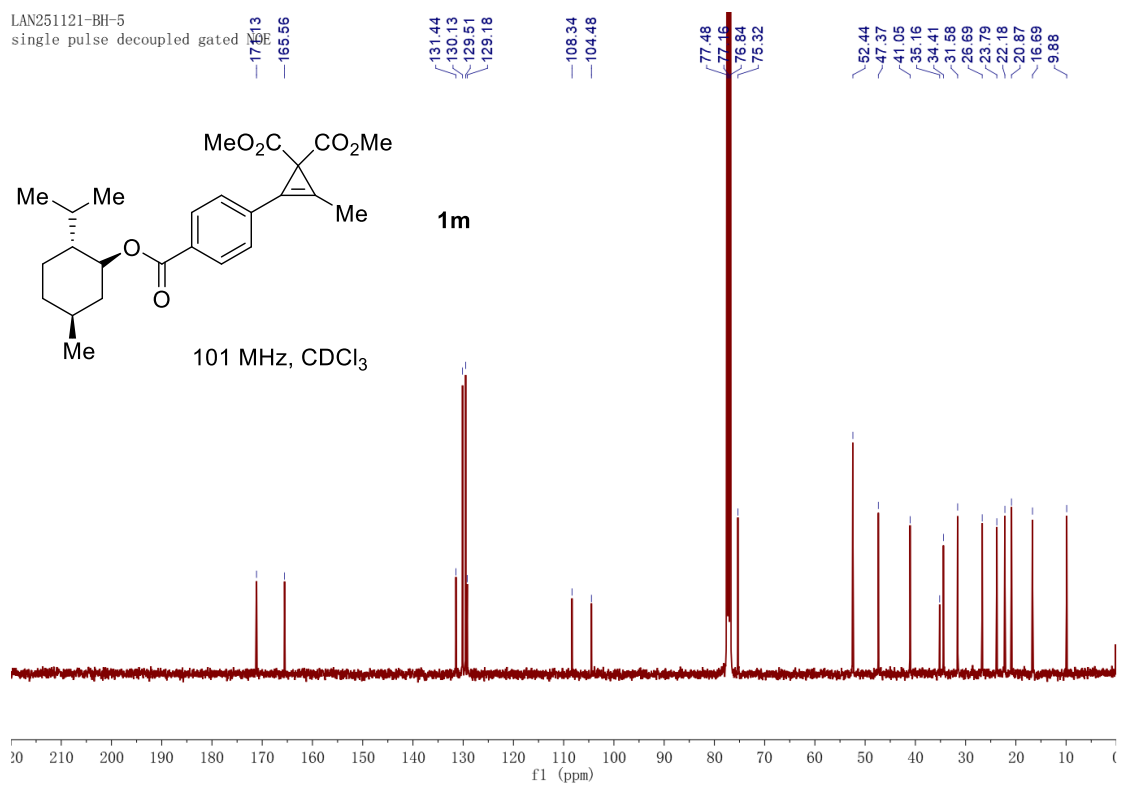

LAN251201-WJ 1  
single\_pulse

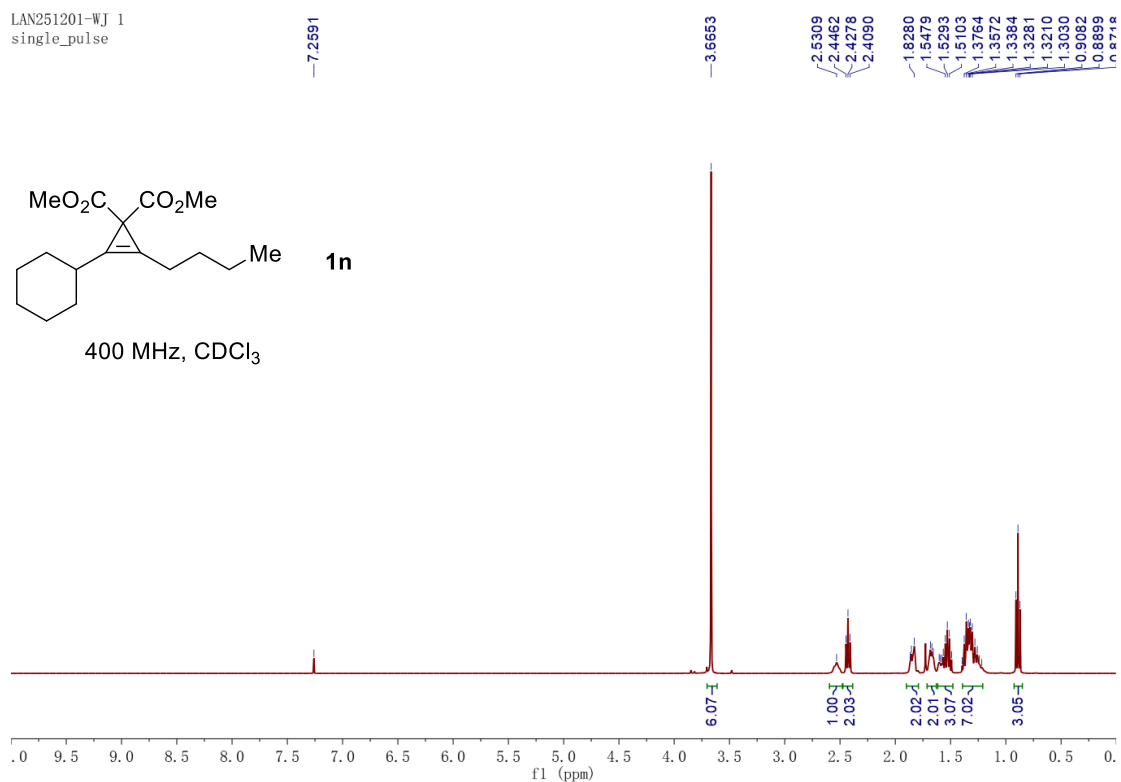

LAN251201-WJ 1  
single pulse decoupled gated

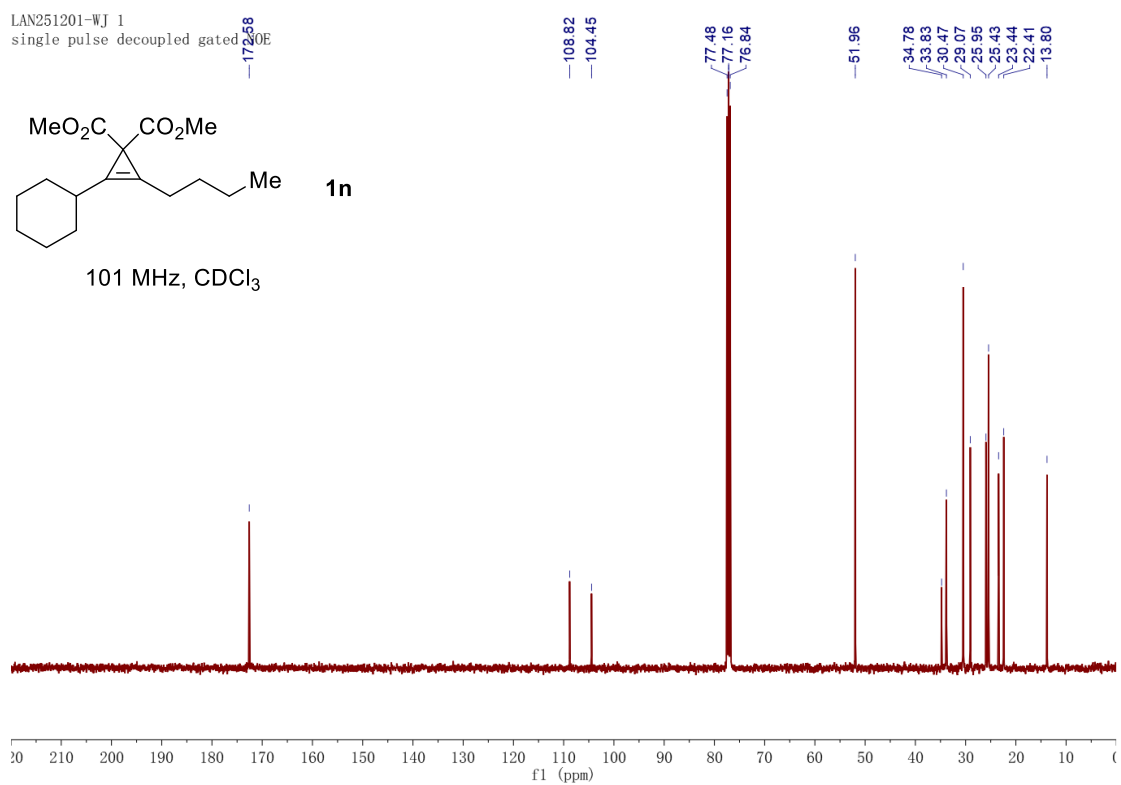

SSY260125-D-2Ph  
single\_pulse

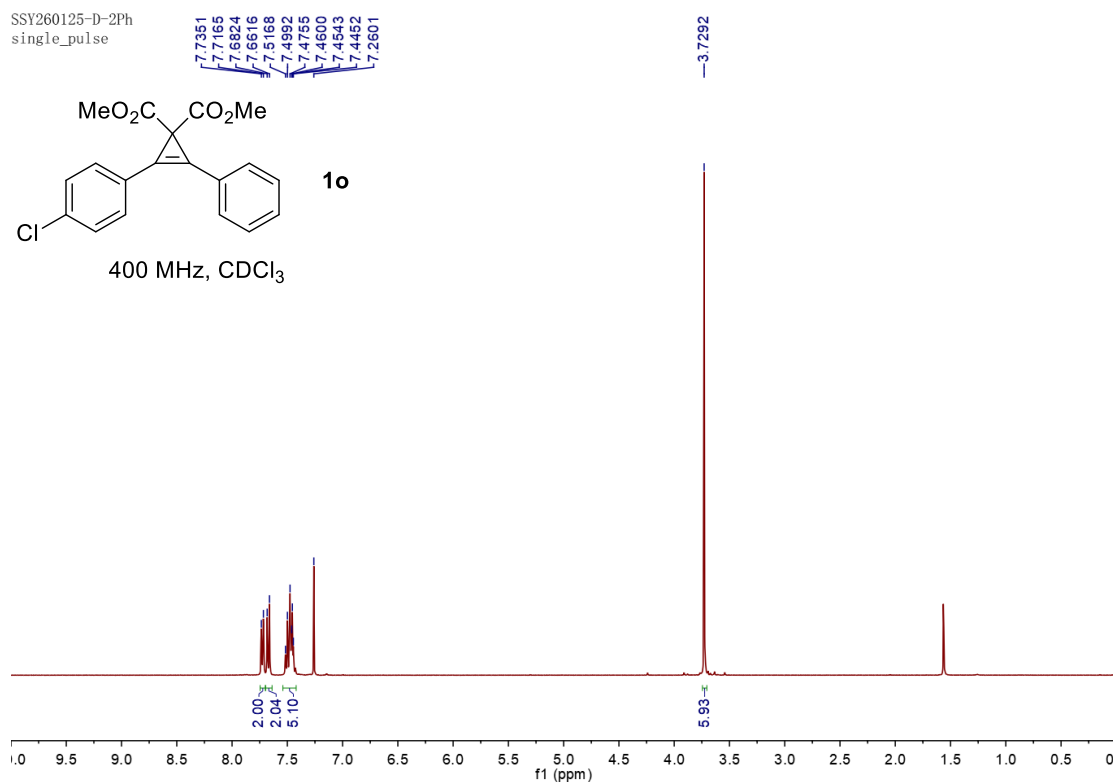

ssy260126-D-2Ph-4h

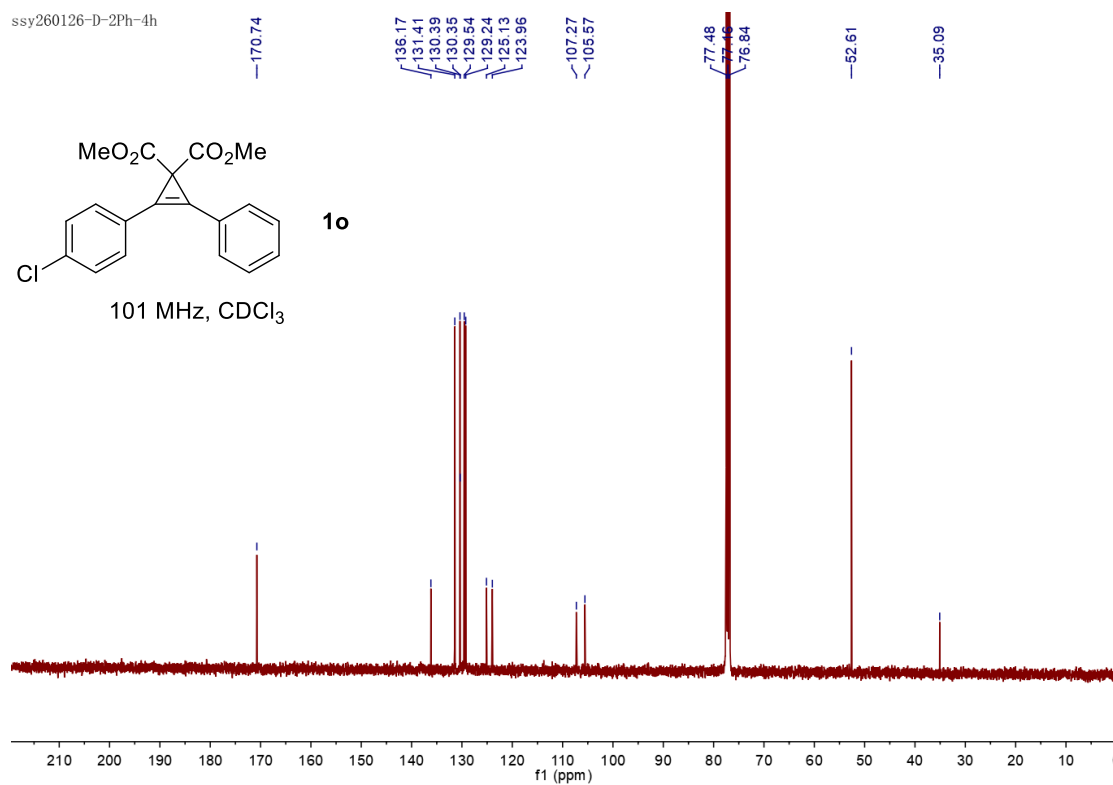

ssy260330-d-3  
single\_pulse

7.8169  
7.8133  
7.8096  
7.8024  
7.7972  
7.7928  
7.5590  
7.5403  
7.5332  
7.5273  
7.5147  
7.5113  
7.4998  
7.4964  
7.4802  
7.4747  
7.2599

4.4135  
4.3956  
4.3777  
4.3598

3.7523

1.4134  
1.3955  
1.3776

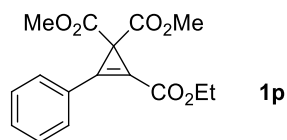

400 HMz, CDCl<sub>3</sub>

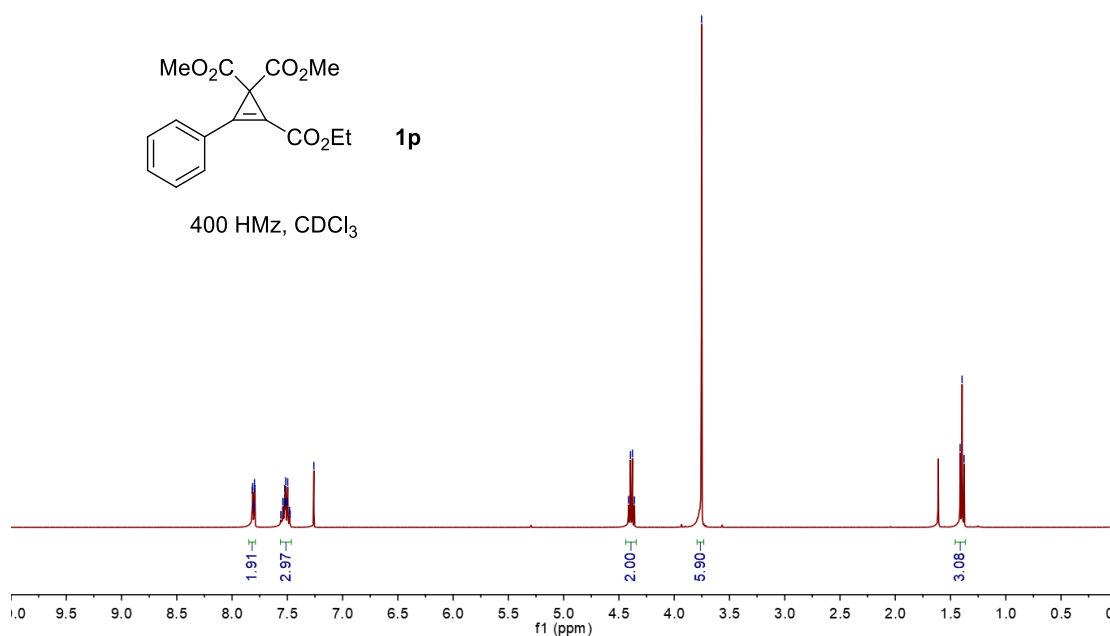

SSY260331-D-3  
single pulse decoupled gated NOE

165.13

157.66

132.67  
132.34  
129.29  
123.12  
120.05

98.69

77.37  
77.16  
76.95

62.34

52.86

36.53

14.35

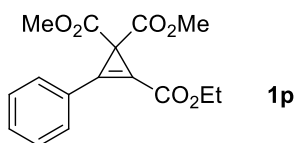

151 HMz, CDCl<sub>3</sub>

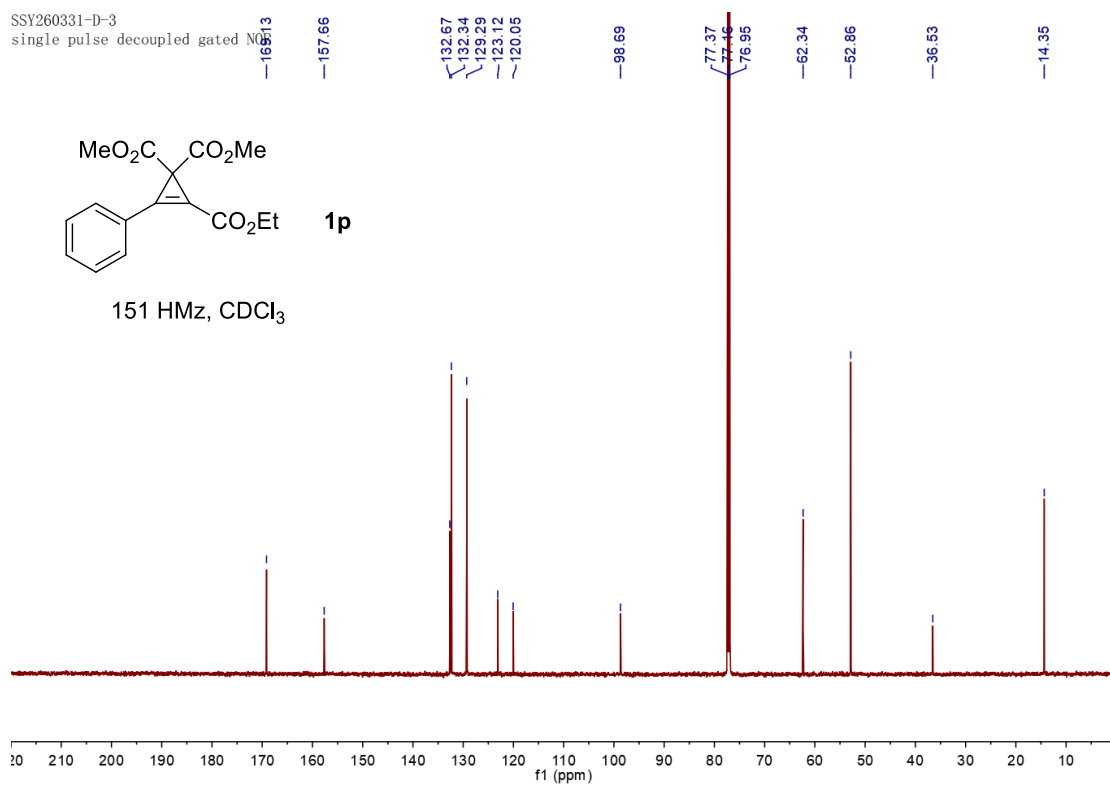

SSY251228-D  
single\_pulse

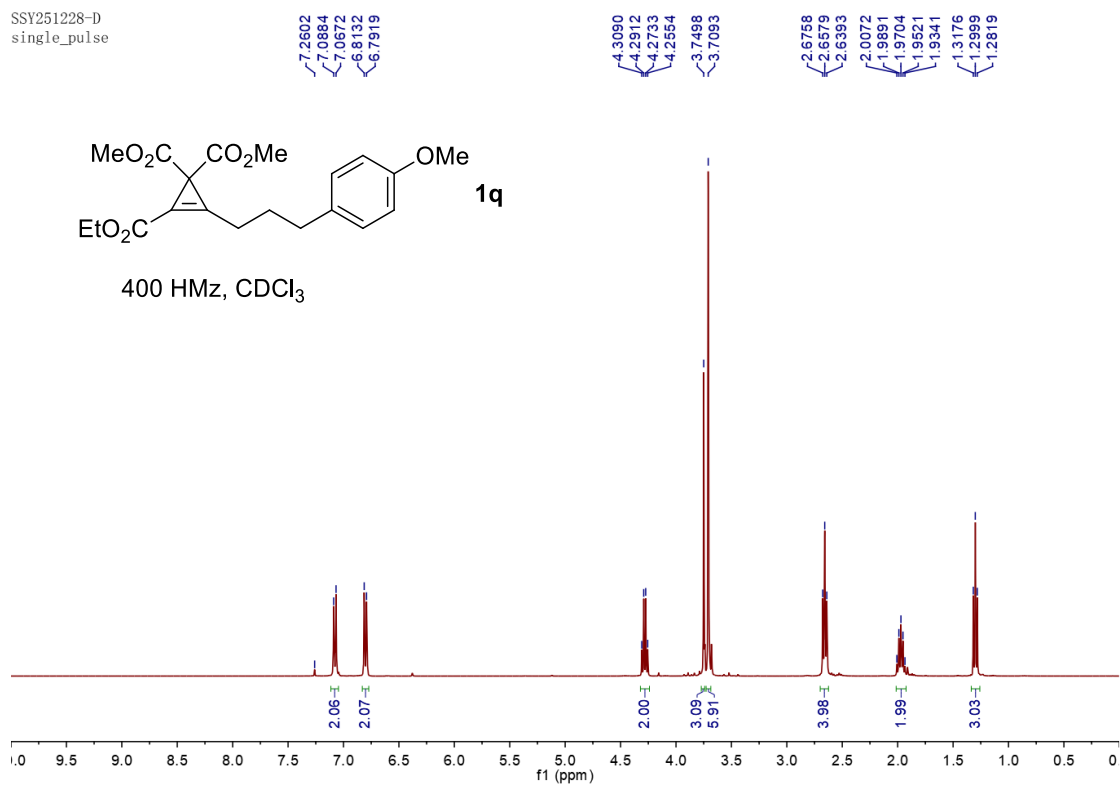

SSY251228-D-C  
single\_pulse decoupled gated

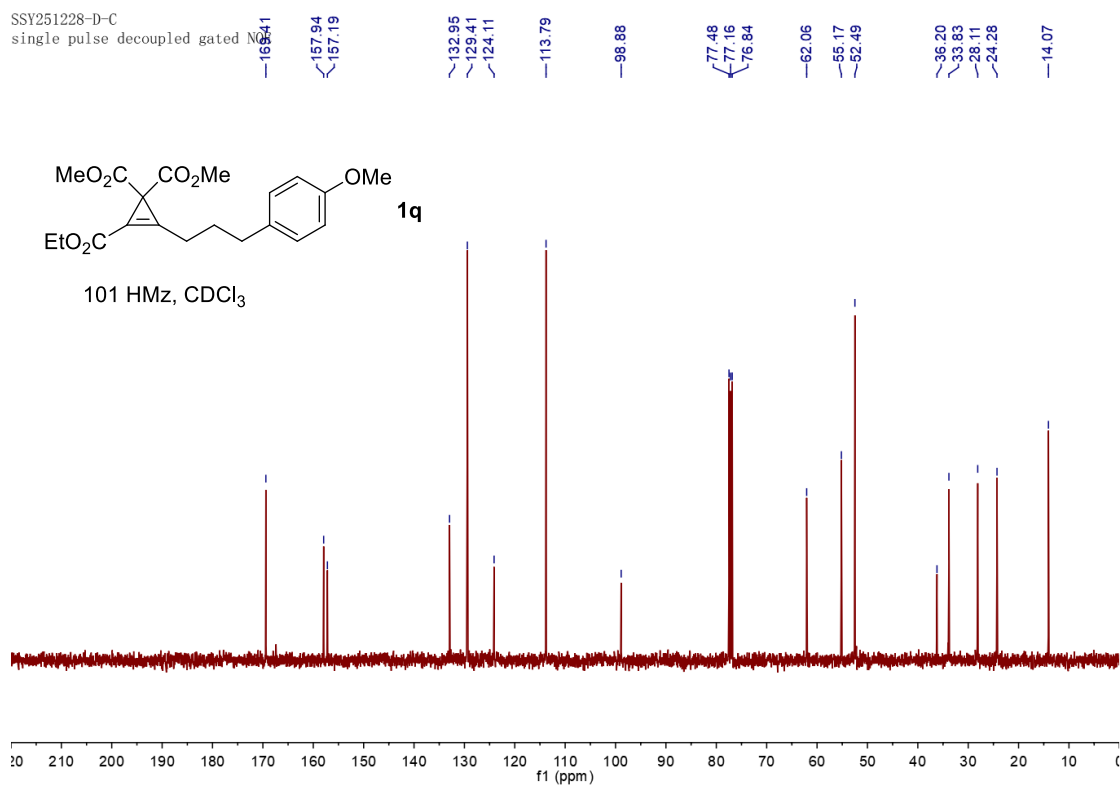

lan250331-1  
single\_pulse

7.2806  
7.2765  
7.2727  
7.2600  
7.2532  
7.2459  
7.2417  
7.2233  
7.2197  
7.2058  
7.2011  
7.1848

3.7926  
3.3845  
3.0973  
3.0769  
2.5139  
2.4950  
2.4756  
2.4566  
1.5648  
1.5607  
1.5462  
1.5419  
1.5236  
1.5011  
1.0725  
1.0541

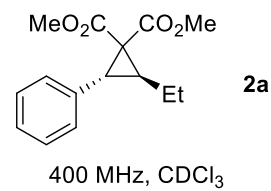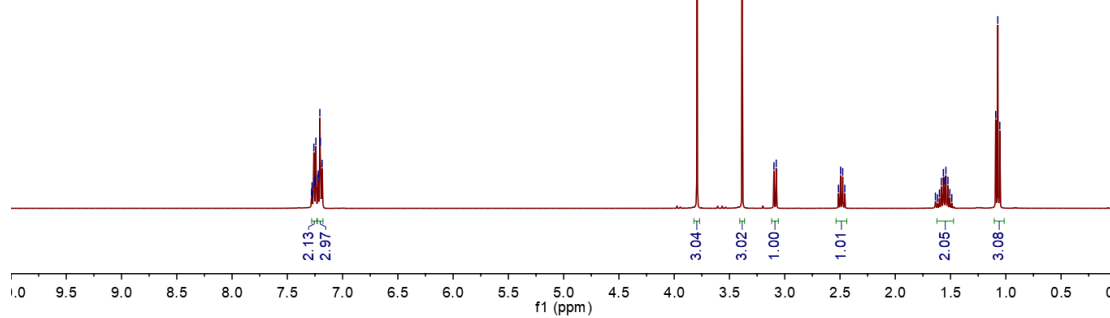

lan250331-1  
single pulse decoupled gated

167.71  
167.75

135.38  
128.66  
128.23  
127.28

77.48  
77.16  
76.84

52.76  
52.35

42.92  
37.15  
32.80

21.10  
13.31

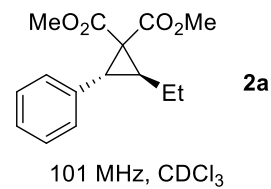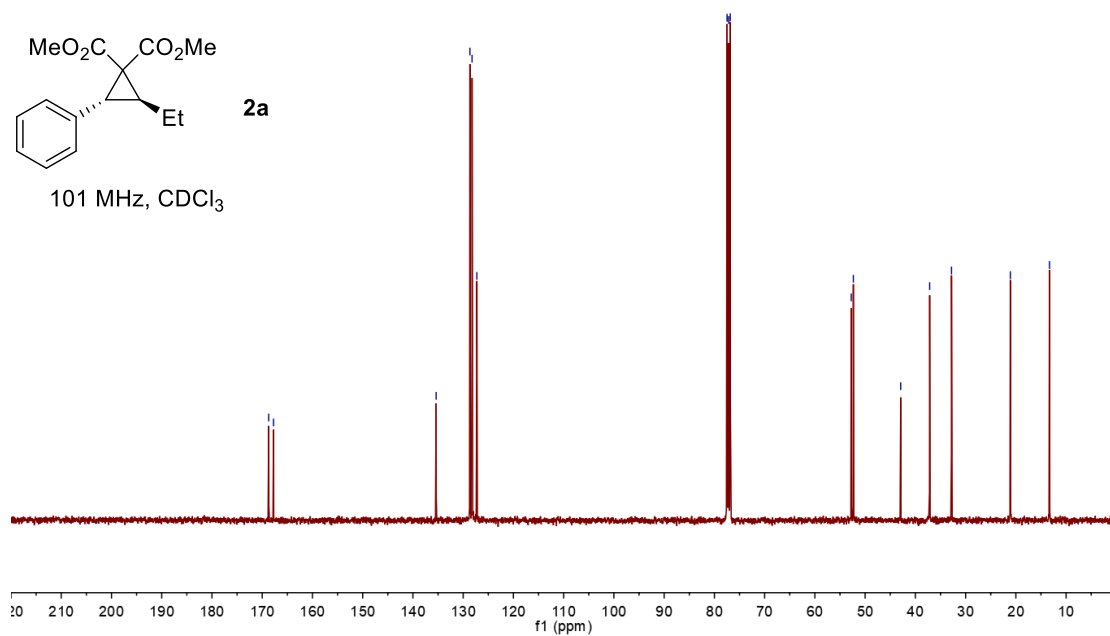

SSY250920-Me-03  
single\_pulse

7.2581  
7.2376  
7.2182  
7.2031  
7.1945  
7.1754

3.7981  
3.3830  
3.0657  
3.0454  
2.5928  
2.5761  
2.5596  
2.5420  
2.5402  
2.5258  
1.2799  
1.2541

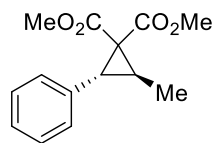

**2b**

400 MHz, CDCl<sub>3</sub>

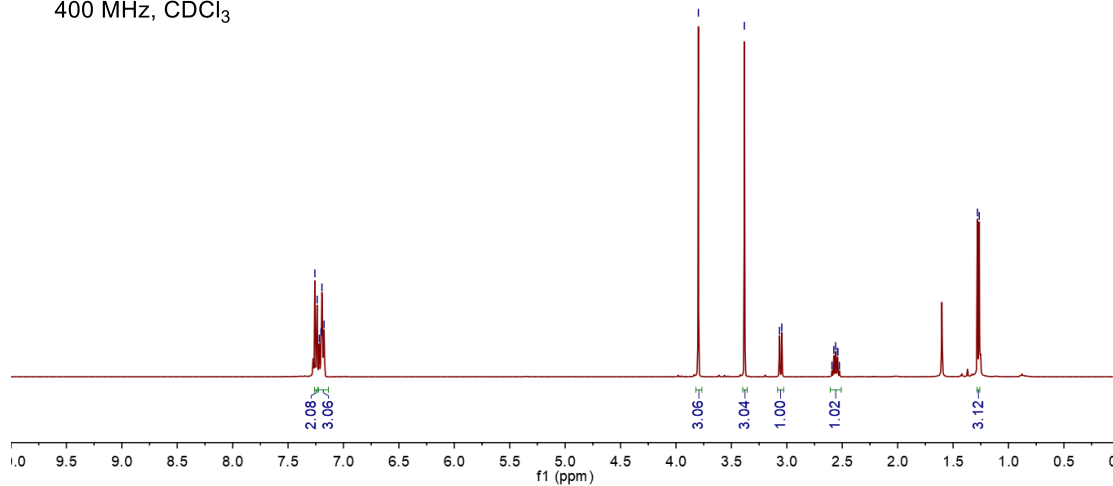

SSY250920-Me-03-C  
single\_pulse decoupled gated

168.58  
167.74

135.25  
128.60  
128.26  
127.30

77.48  
77.48  
76.84  
52.79  
52.39  
43.33  
38.02  
25.40  
12.64

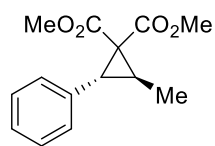

**2b**

101 MHz, CDCl<sub>3</sub>

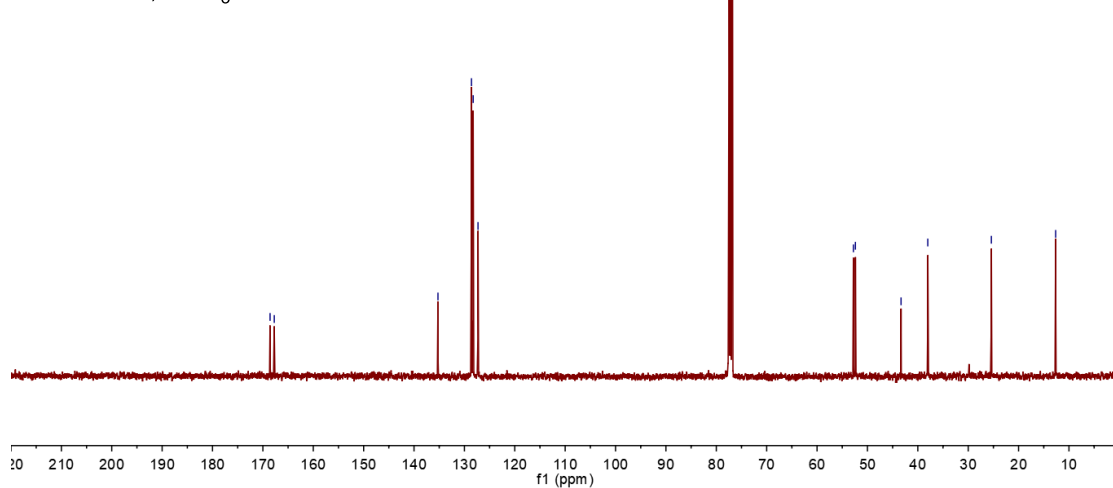

ssy250525-dj-1-400z

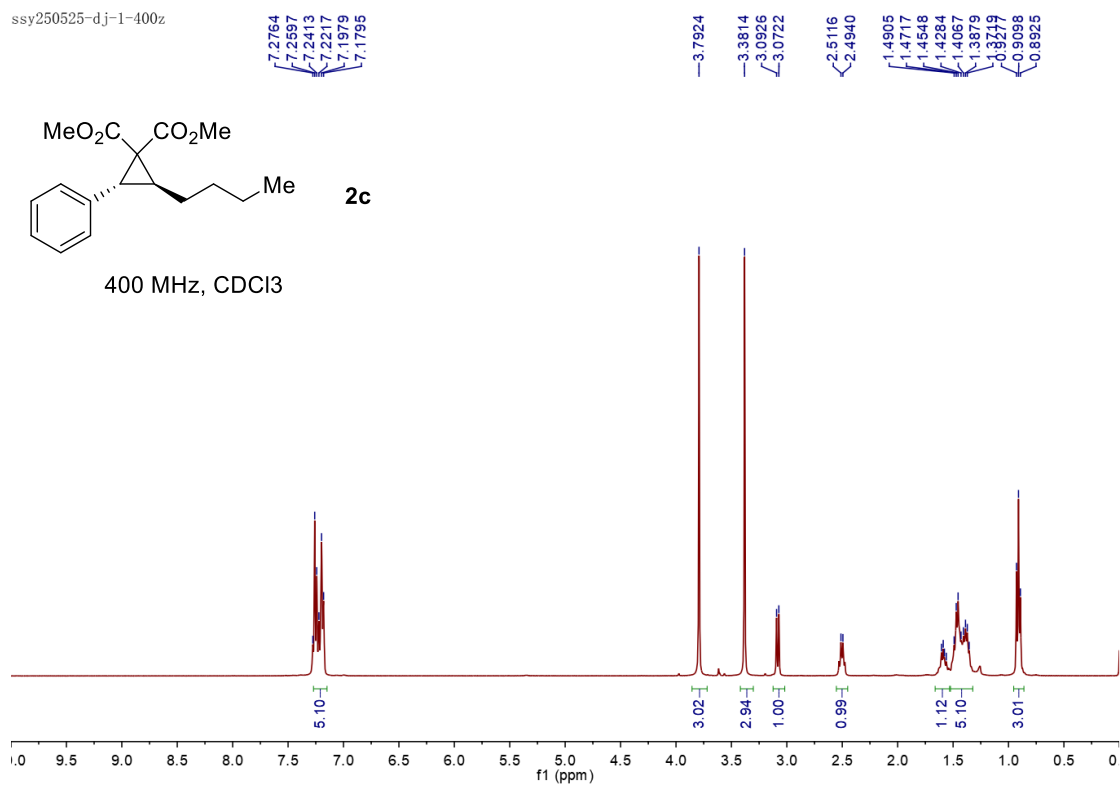

ssy250523-dj-1

single pulse decoupled gated

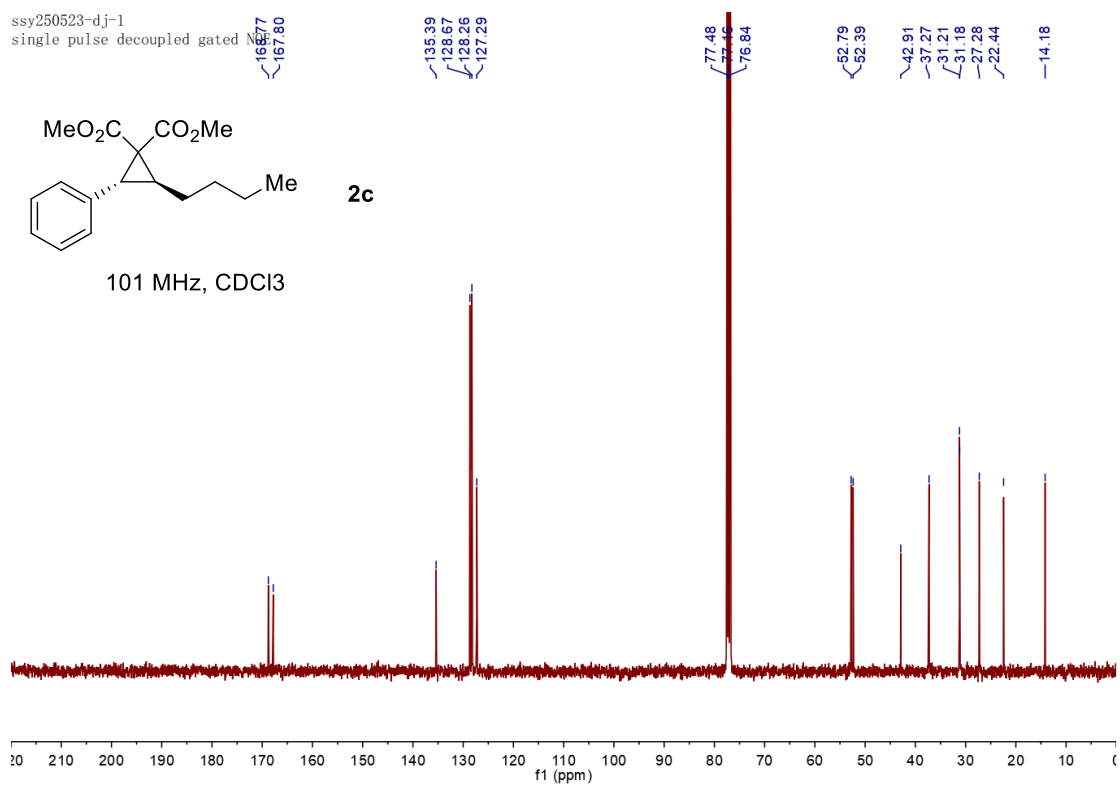

ssy250602-C1-0-Z-4

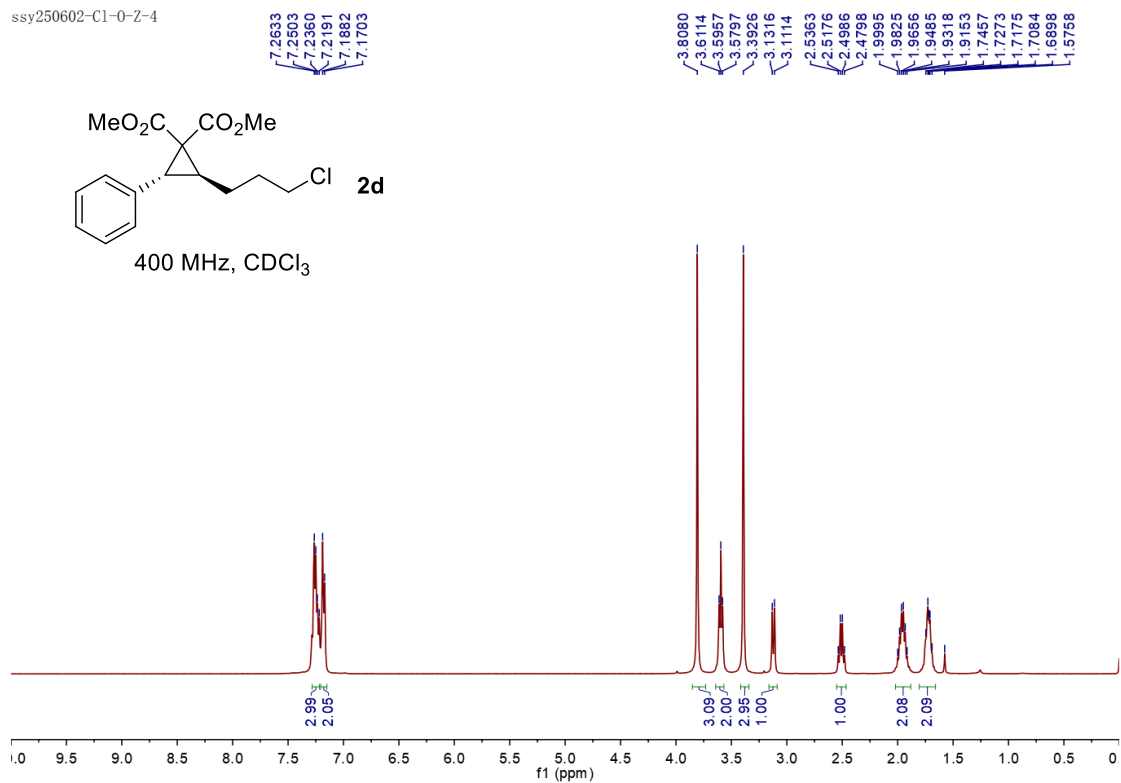

ssy250531-C1-0-Z-C

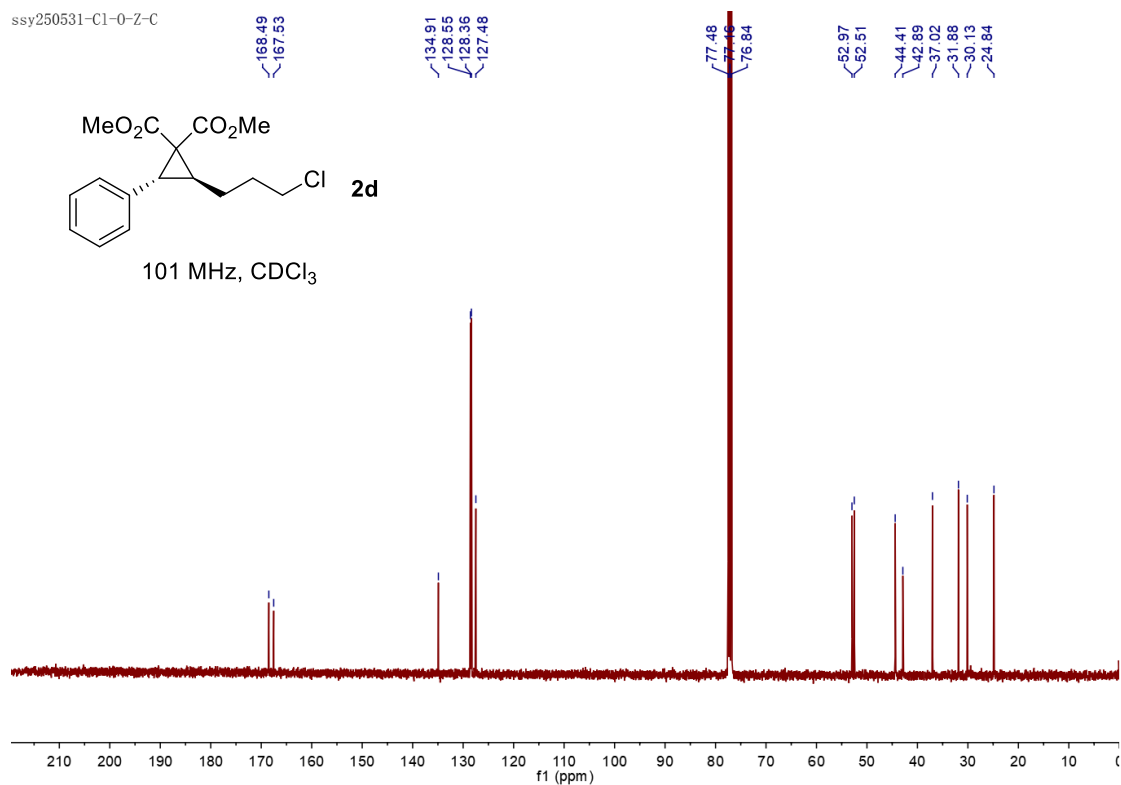

SSY260107-YX-2

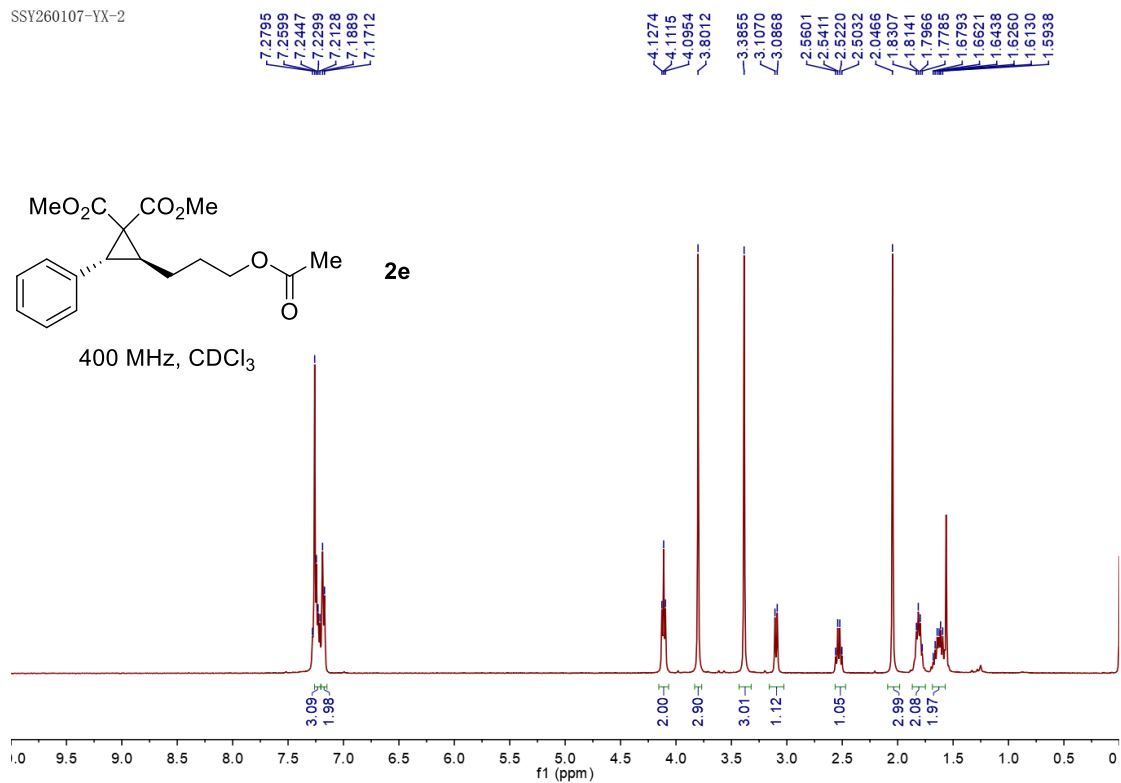

ssy251018-yx-2-c

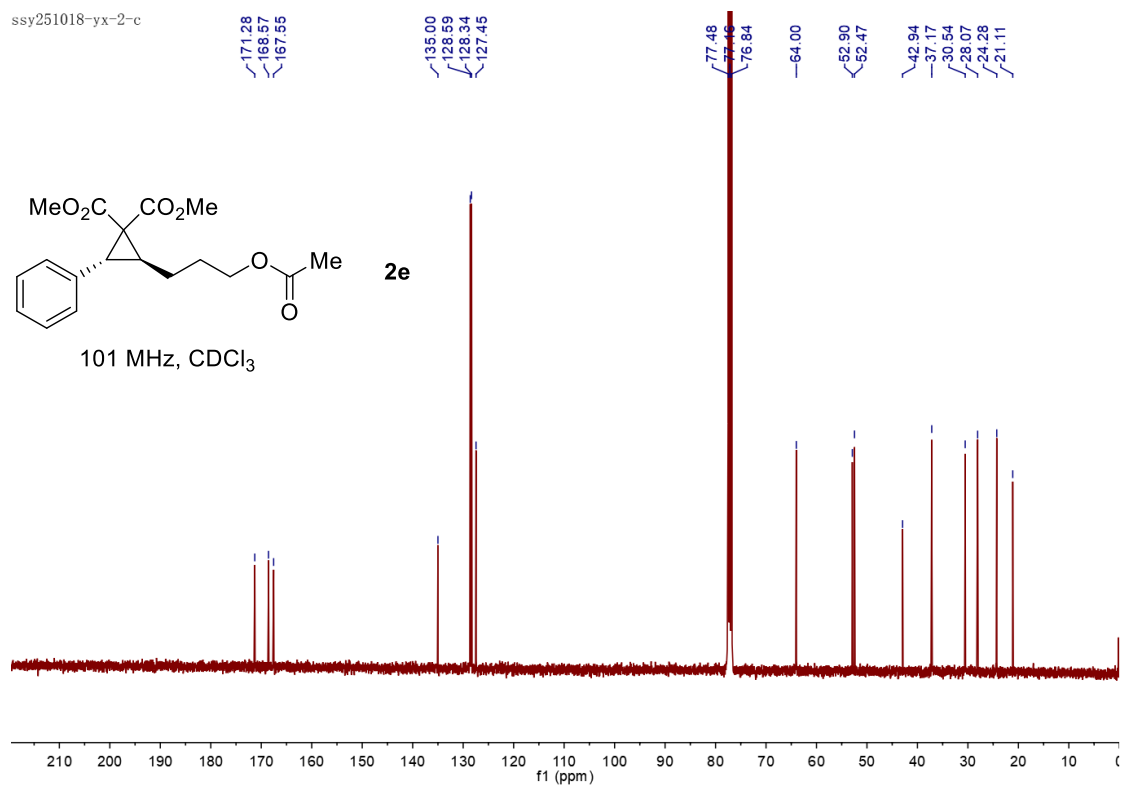

SSY250816-Br-01  
single\_pulse

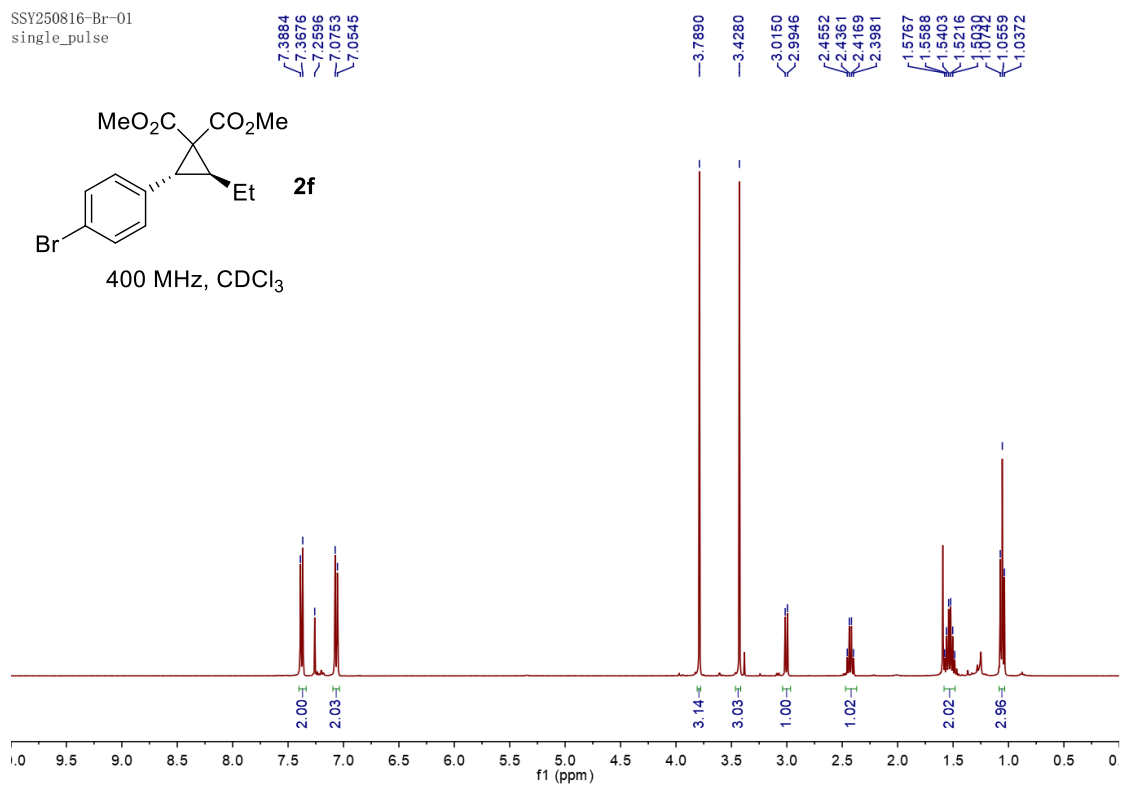

SSY250815-Br-01-C  
single\_pulse decoupled gated

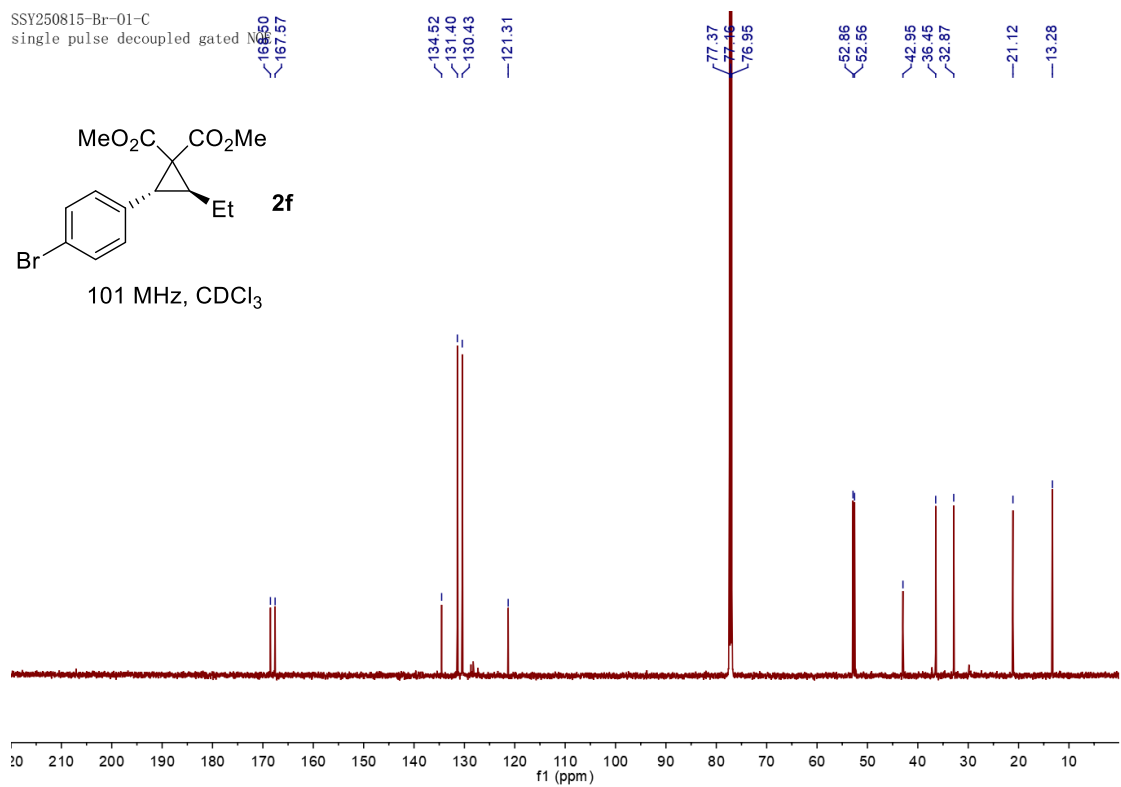

ssy251013-2c1-o2  
single\_pulse

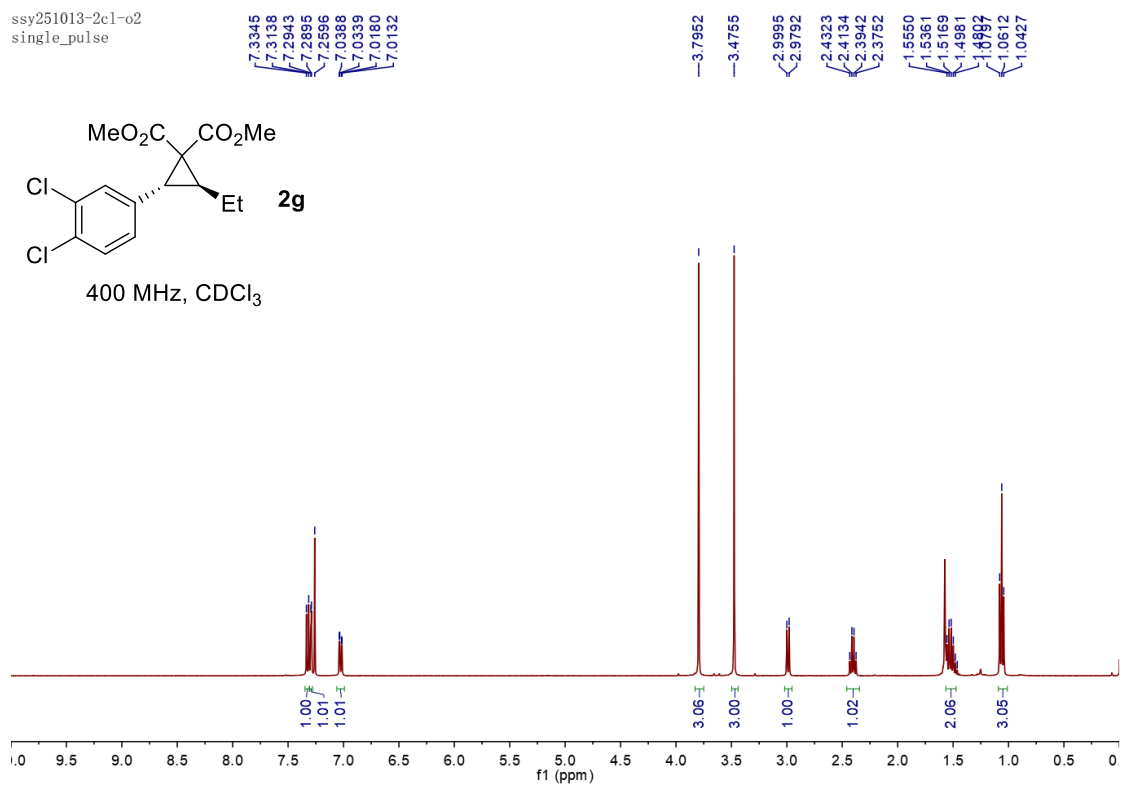

ssy251013-2Cl-0Z-C

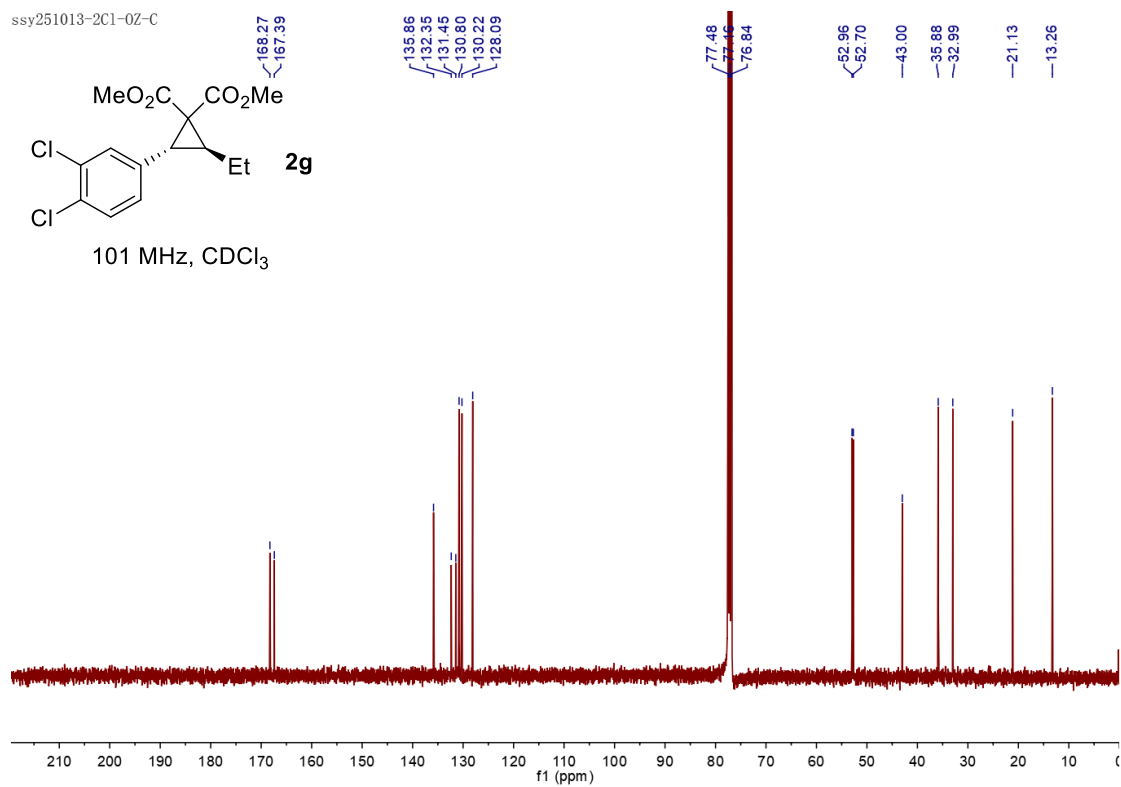

LAN251012-NA2

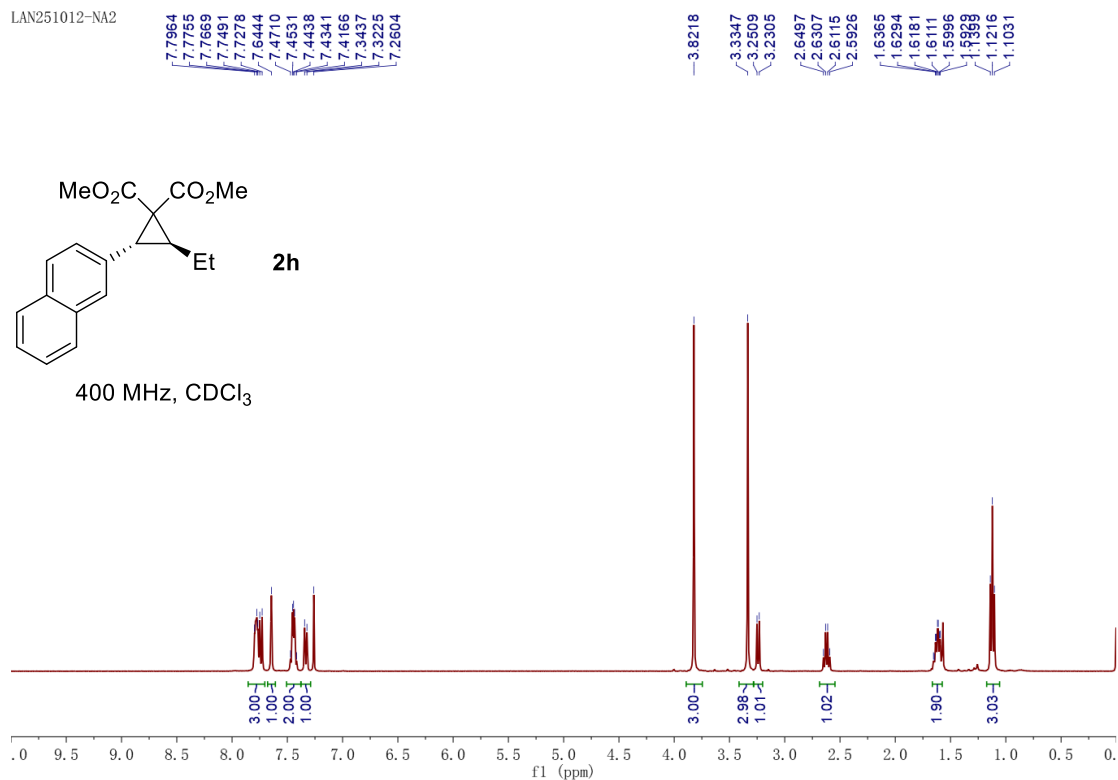

LAN251011-NA2

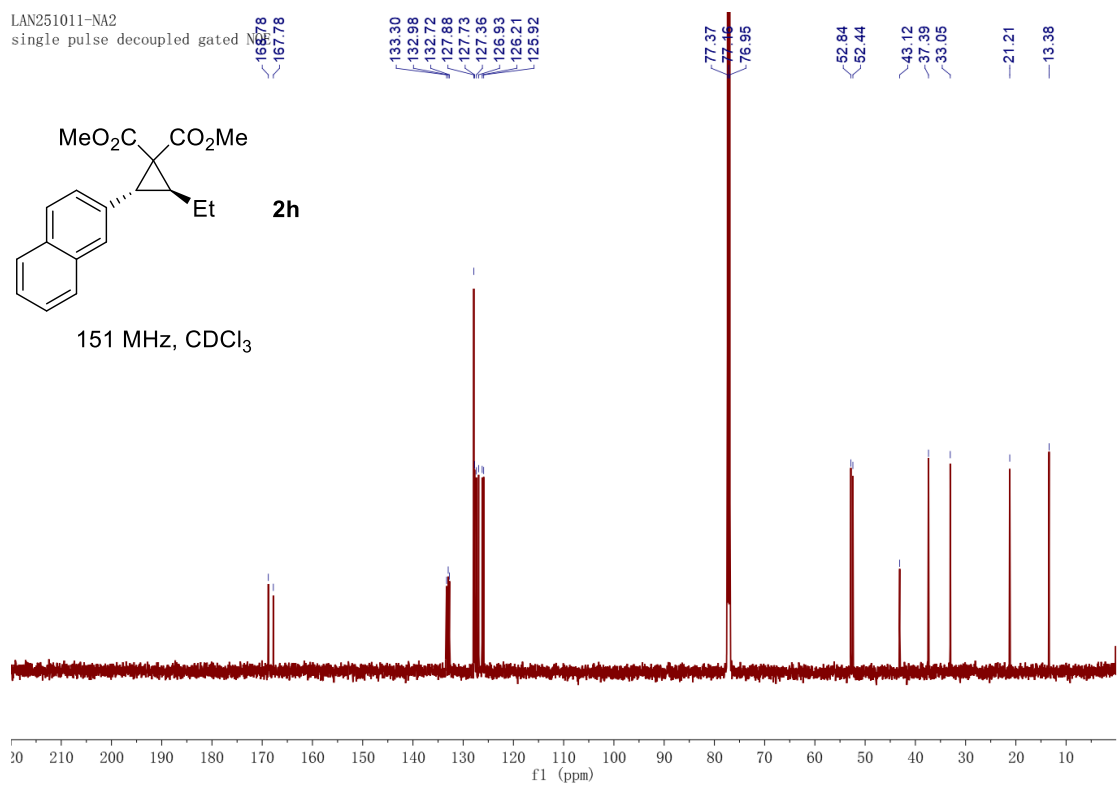

LAN-251212-SF-P  
single\_pulse

7.2602  
7.2130  
7.2056  
7.2006  
7.1932  
7.0260  
7.0224  
7.0188  
7.0154  
7.0121  
6.9306  
6.9182

3.7812  
3.4557  
3.0062  
2.9861  
2.4195  
2.4006  
2.3815  
2.3625  
1.5601  
1.5563  
1.5413  
1.5380  
1.5221  
1.5667  
1.0422  
1.0237

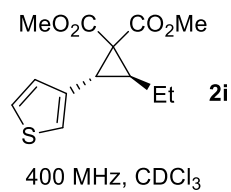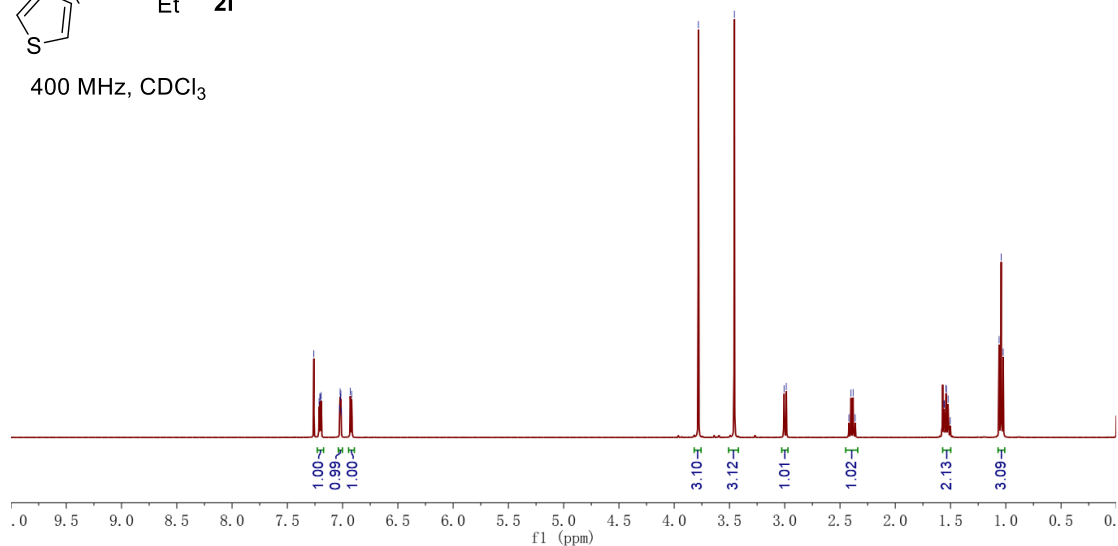

LAN-251212-SF-P  
single pulse decoupled gated

167.84  
166.64

136.45

128.08

125.98

122.49

77.48  
77.46  
76.84

52.79

52.52

42.78

34.00

32.40

20.93

13.26

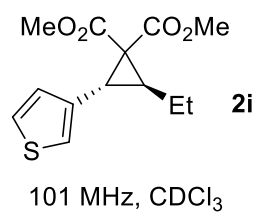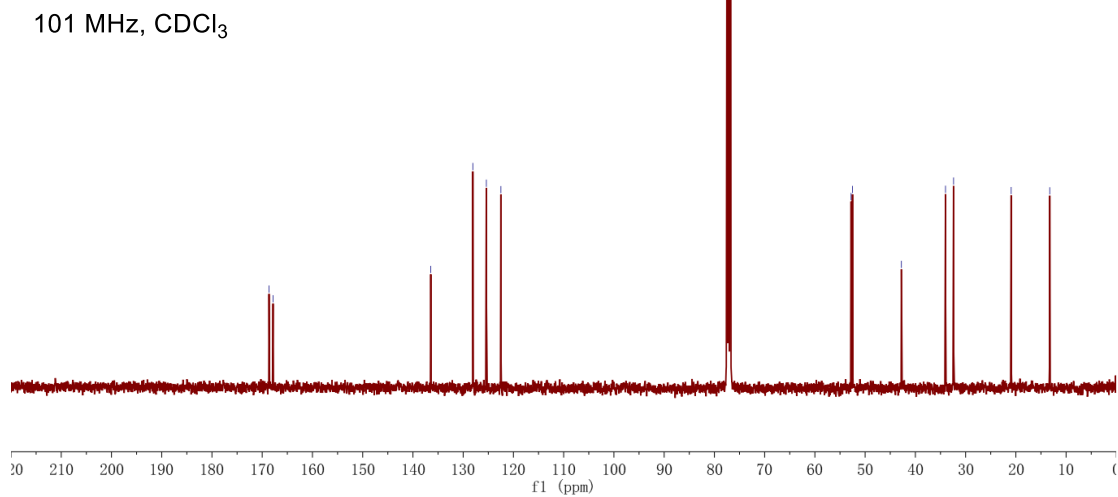

SSY-250709-CH3-OPT  
single\_pulse

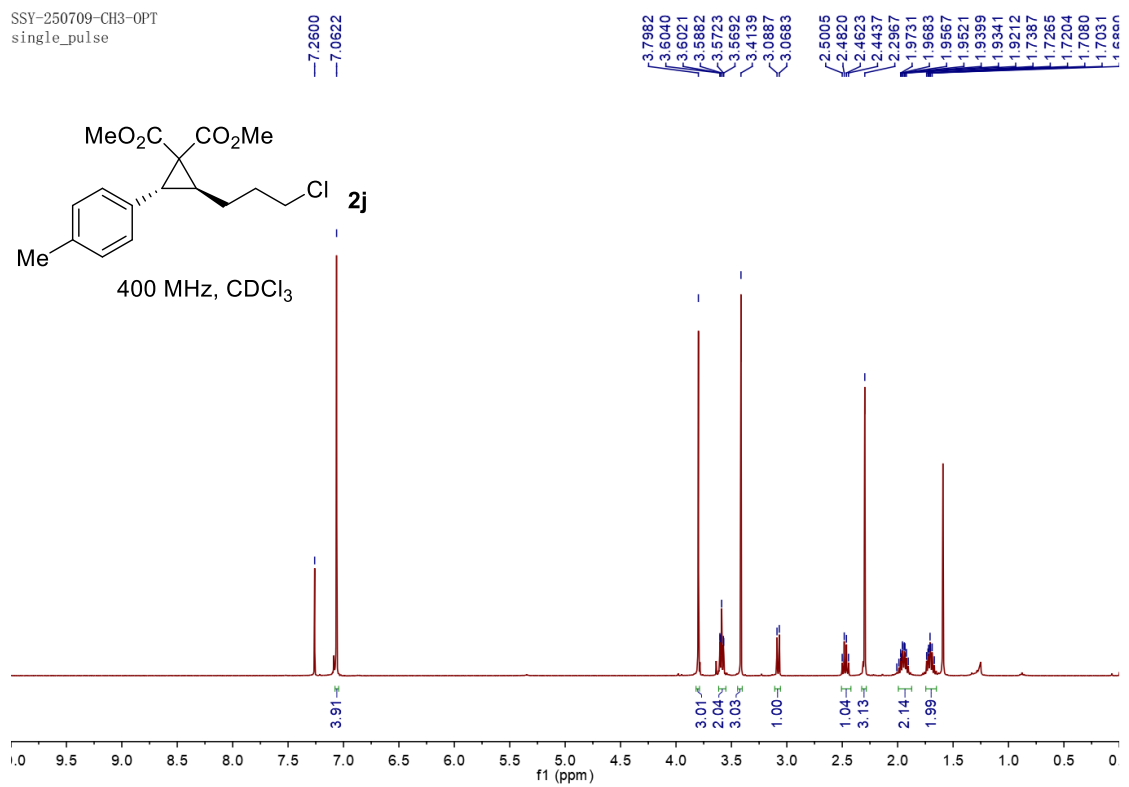

SSY250711-CH3-0  
single pulse decoupled gated

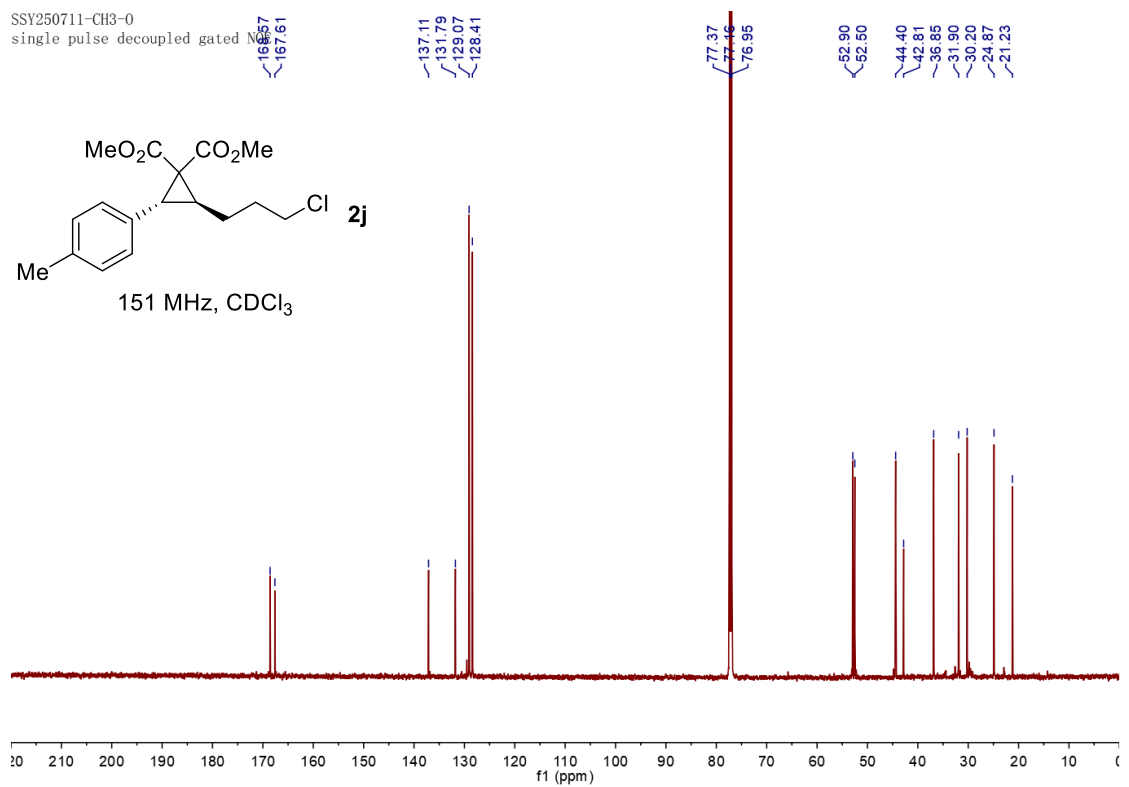

lan251005-ome-ath

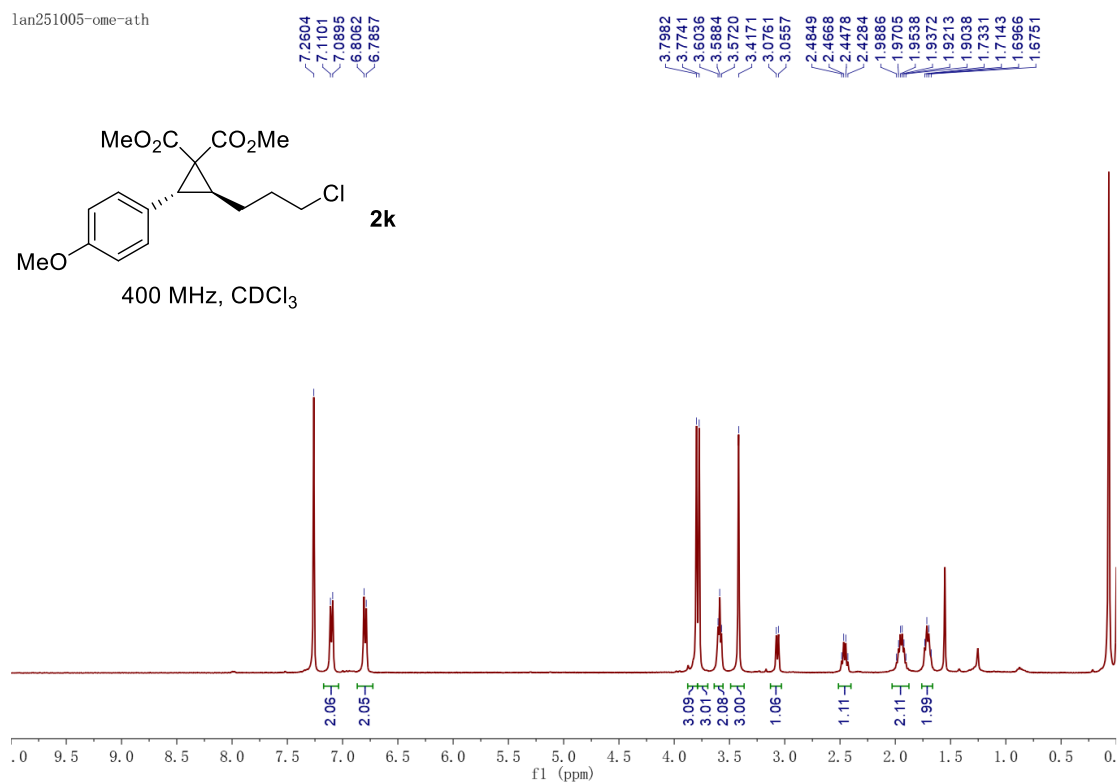

LAN250930-OME-C

single pulse decoupled gated

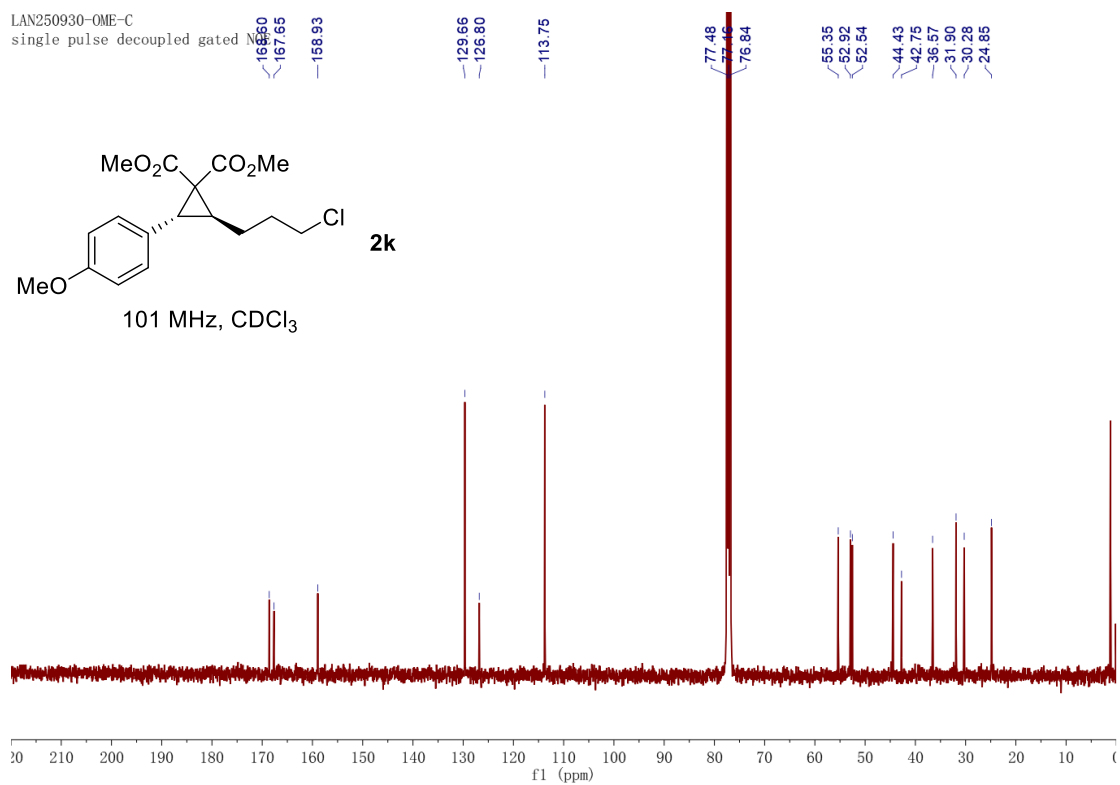

LAN250905-P1  
single\_pulse

7.2604  
7.2399  
7.2213  
7.2031  
7.1995  
7.1848  
6.9777  
6.9588  
6.9245  
6.9188  
6.9022  
6.8782

3.7860  
3.4211  
3.0544  
3.0340  
2.4819  
2.4640  
2.4454  
2.4276  
1.4589  
1.4415  
1.4272  
1.4089  
1.3751  
0.9217  
0.9030  
0.8853

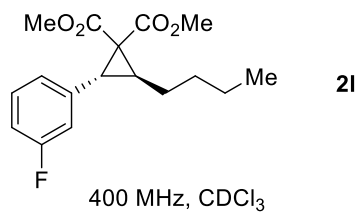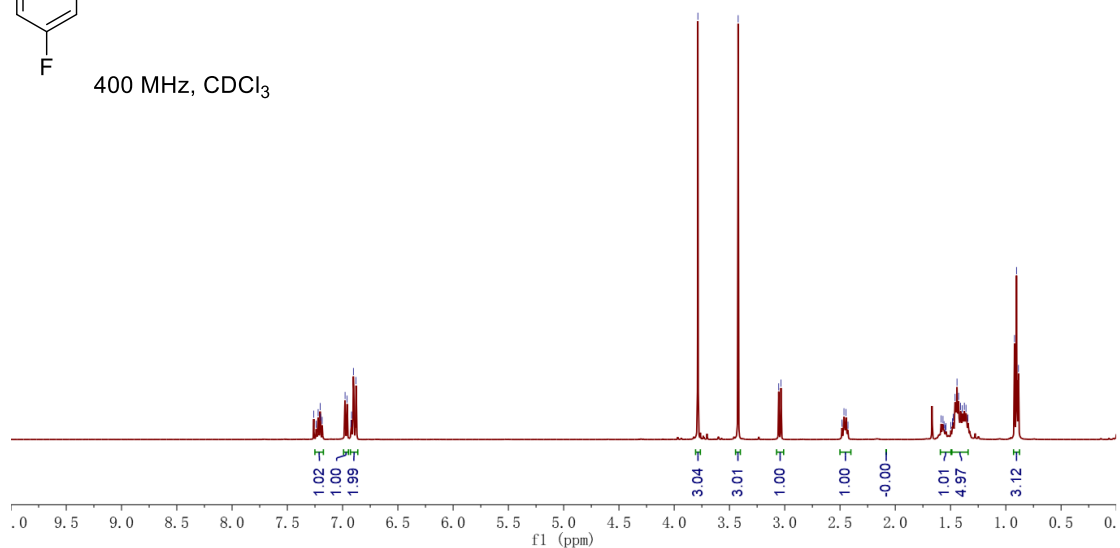

lan250905-P1

168.46  
167.52  
163.91  
161.46

138.09  
138.02  
129.76  
129.67  
124.41  
124.38  
116.74  
115.53  
114.38  
114.17

77.46  
77.16  
76.84

52.83  
52.48

42.95  
36.64  
36.62

31.29  
31.13  
27.21  
22.40

14.12

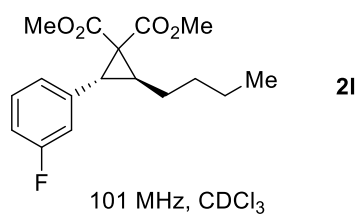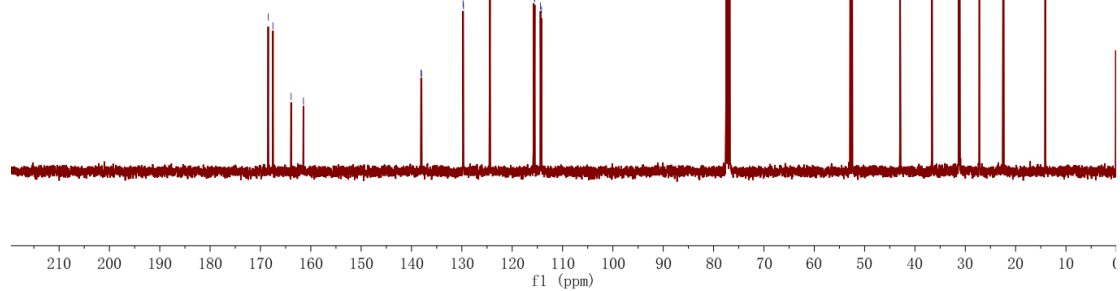

SSY260113-F1

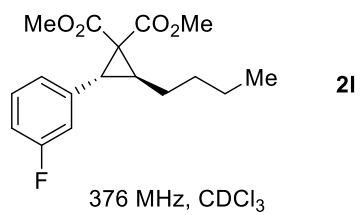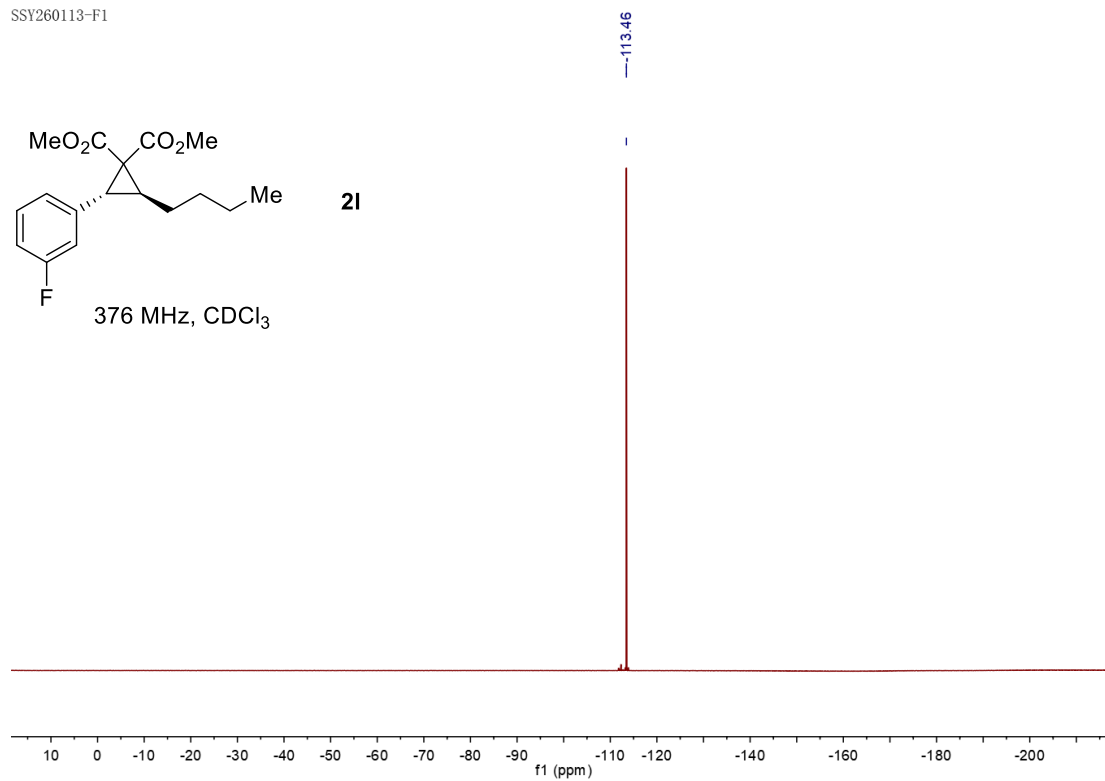

LAN250905-P2  
single\_pulse

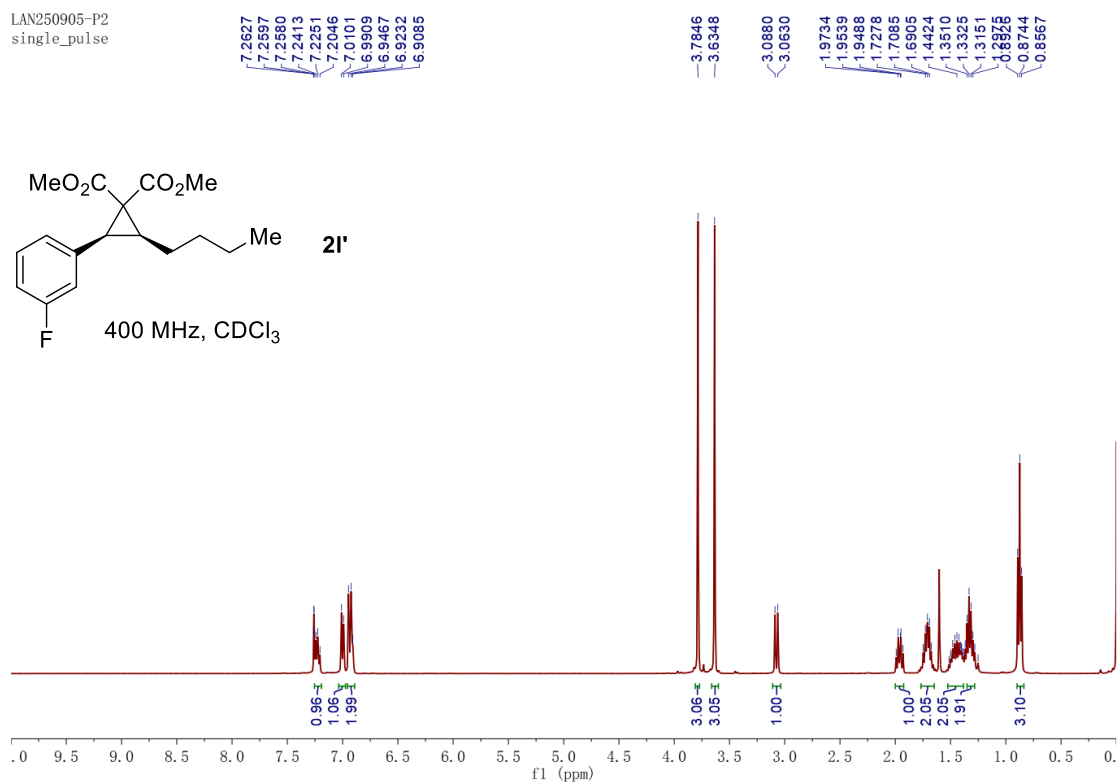

lan250905-P2

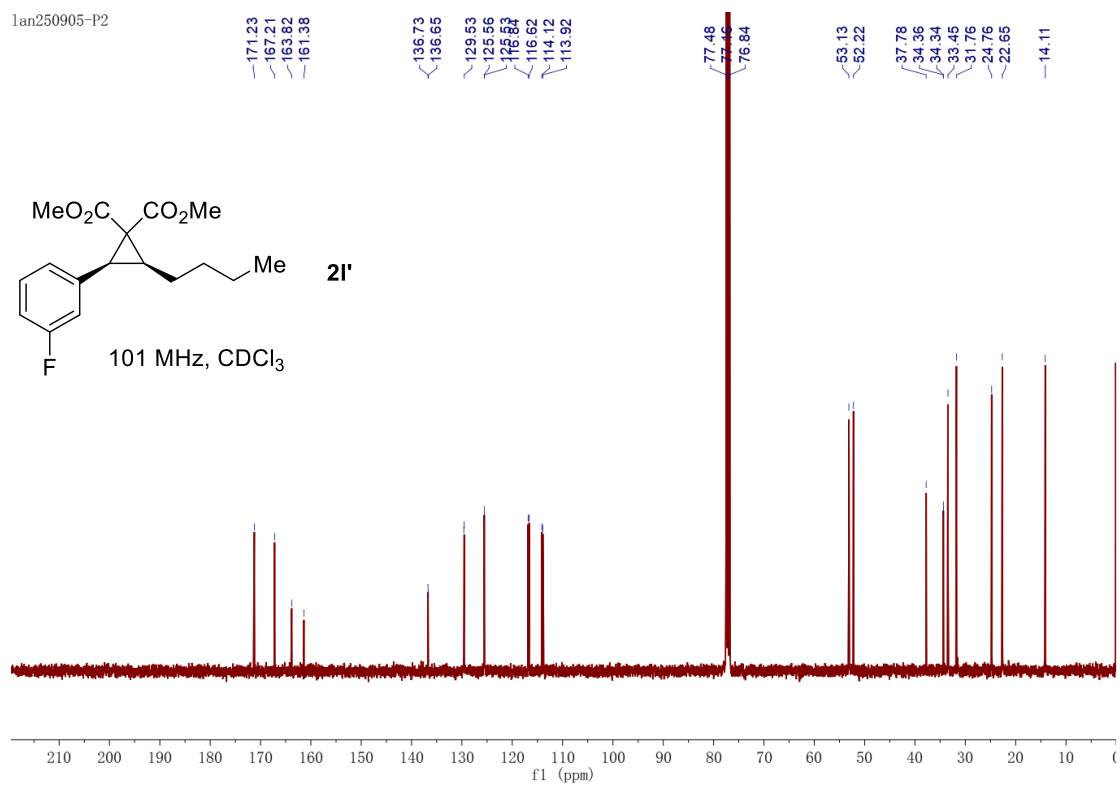

SSY260113-F2

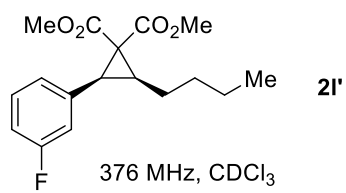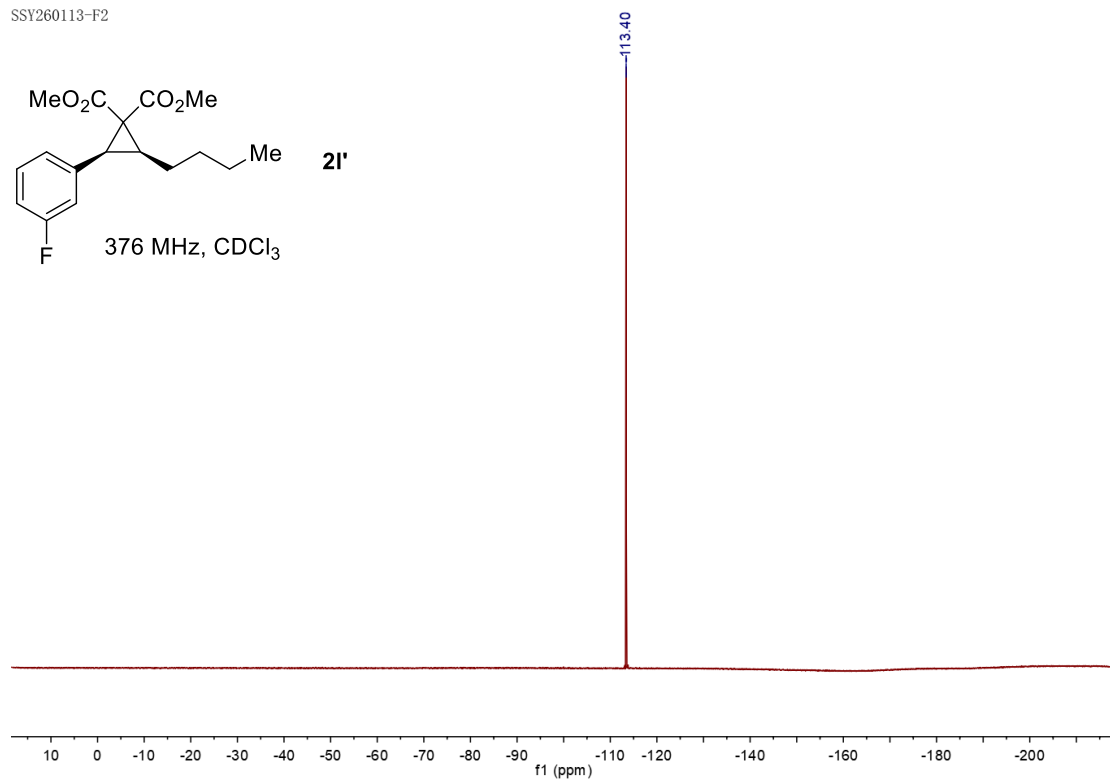

lan251124-BH-P  
single\_pulse

7.9349  
7.9143

7.2597  
7.2382

4.9335  
4.9226  
4.8062  
4.8984  
4.8791  
4.8682

3.8070  
3.4168  
3.0808  
3.0605

2.5916  
2.5753  
2.5720

1.7340  
1.7053  
1.5618  
1.5339  
1.2885  
1.2727  
1.0636  
0.9242  
0.9167  
0.9079  
0.8992  
0.7825  
0.7651

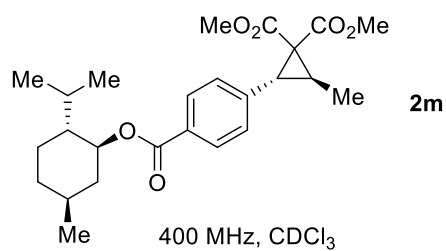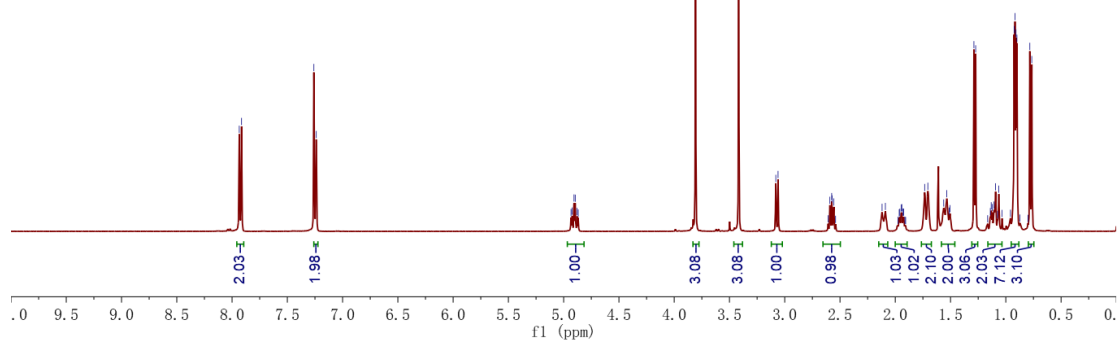

LAN251123-bh-p  
single pulse decoupled gated

165.28  
167.49  
166.01

140.43  
129.83  
129.53  
128.59

77.48  
77.16  
76.84  
74.96

52.91  
52.62  
47.35  
43.54  
41.07  
37.69  
34.43  
31.57  
26.52  
25.60  
23.68  
22.18  
20.93  
16.57  
12.65

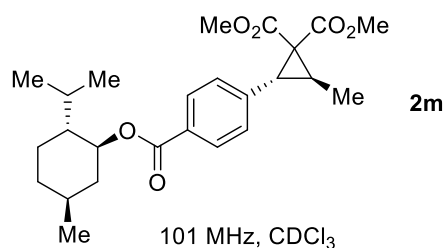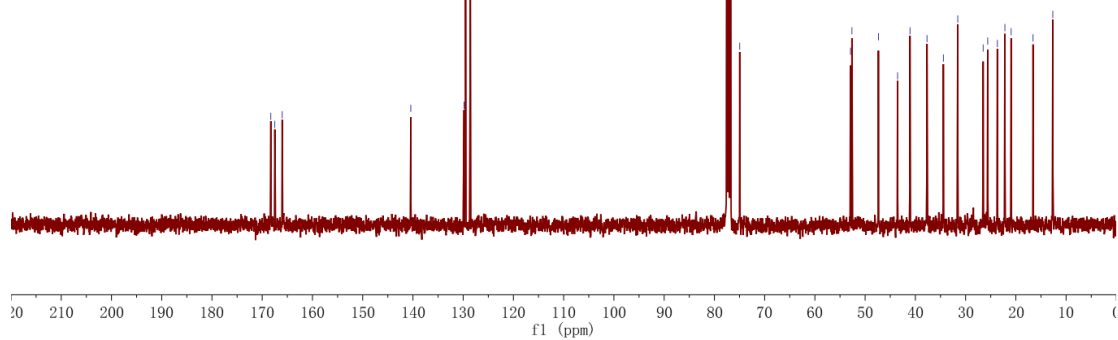

SSY250107-WJ-01

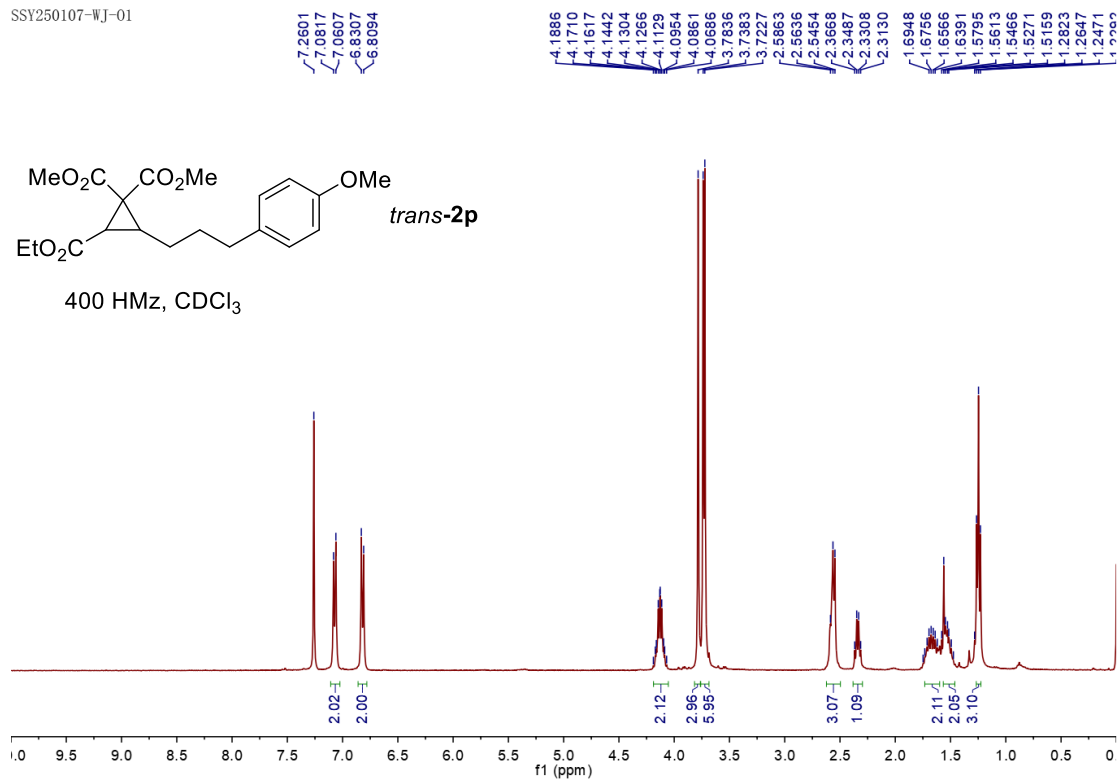

SSY260106-WJ-ATH-C

single pulse decoupled gated

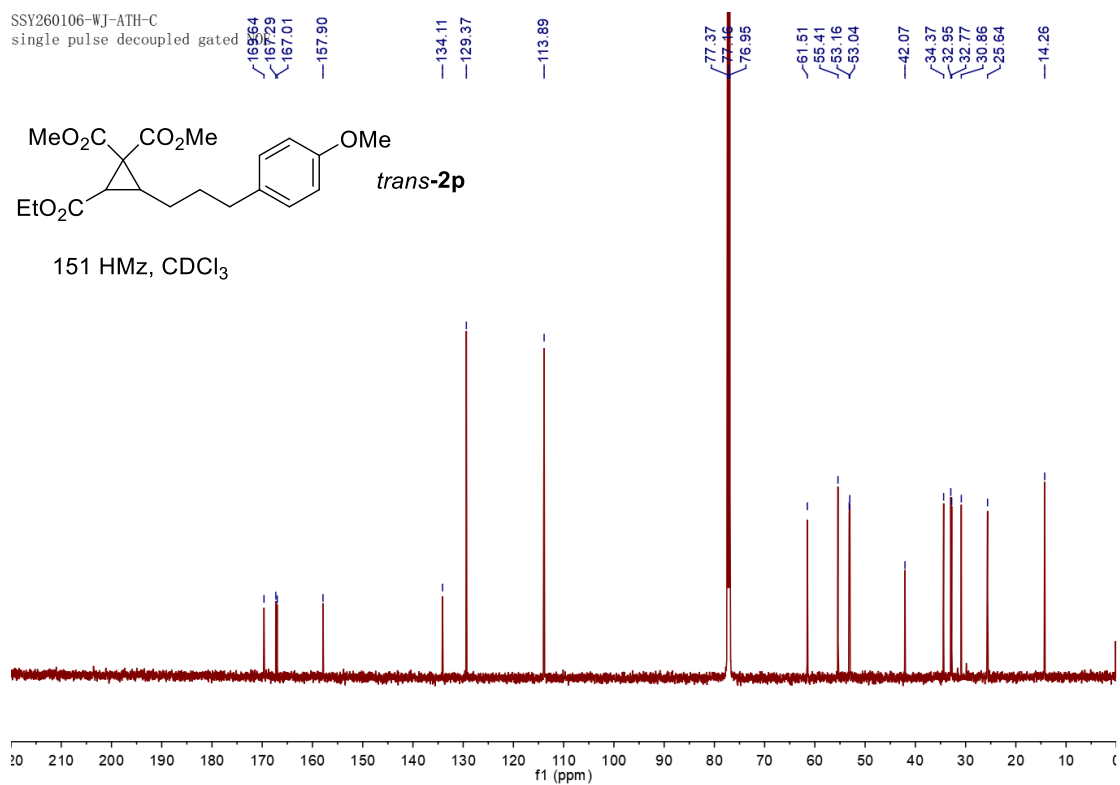

SSY260117-20

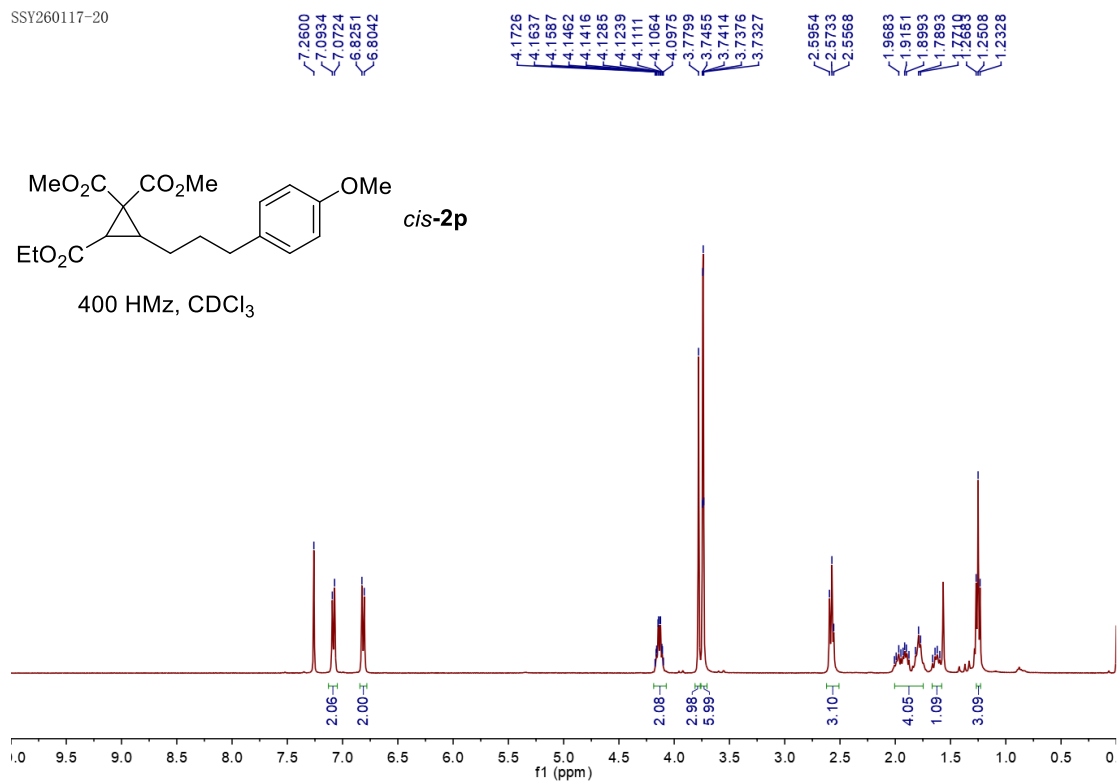

SSY250117-20-C

single pulse decoupled gated

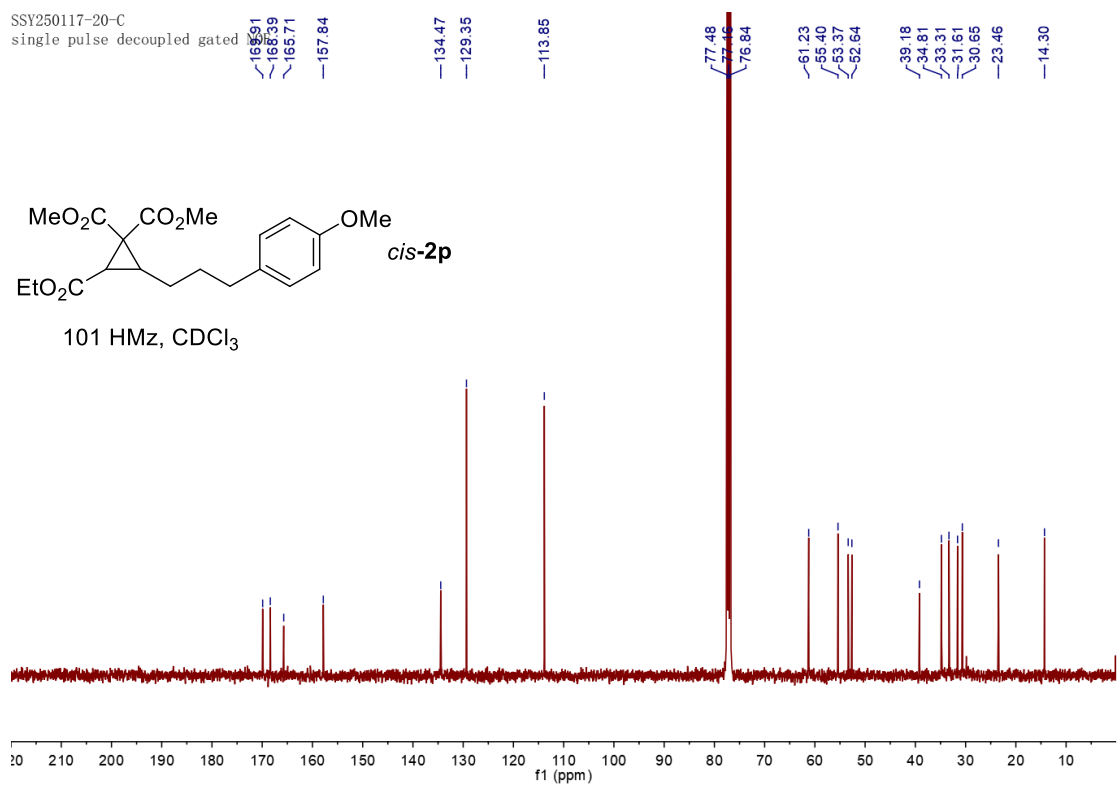

ssy260401-01-1  
single\_pulse

7.2942  
7.2801  
7.2714  
7.2626  
7.2532

4.2523  
4.2436  
4.2262  
4.2097  
4.1933  
4.1765  
4.1674  
3.8169  
3.6541  
3.6352  
3.4835  
3.2532  
3.2343

1.3193  
1.3014  
1.2838

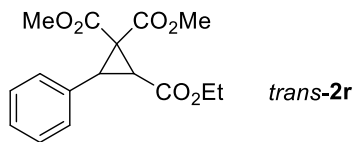

400 HMz, CDCl<sub>3</sub>

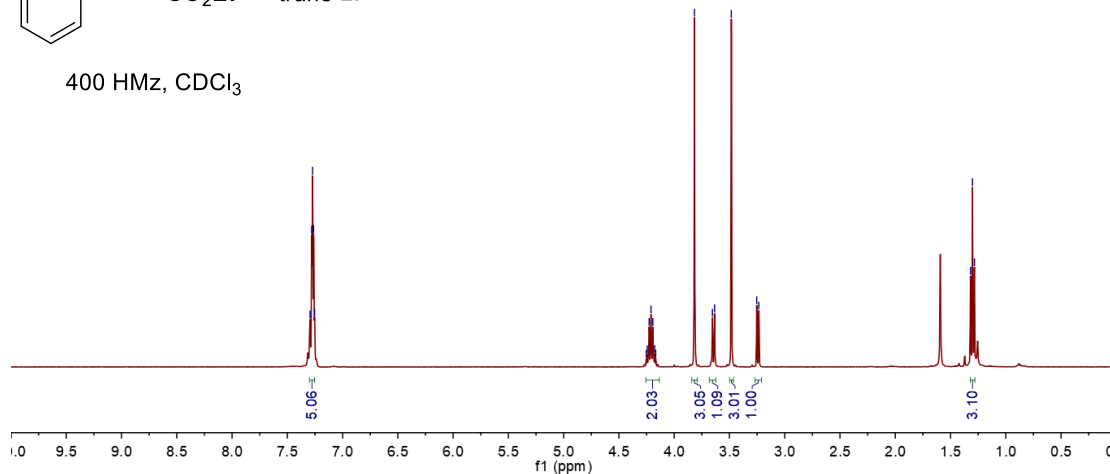

ssy260401-01-1-C  
single pulse decoupled gated

165.18  
165.59  
165.83

133.00  
128.70  
128.47  
127.89

77.48  
77.16  
76.84

61.81

53.25  
53.00

44.19

36.12

31.28

14.28

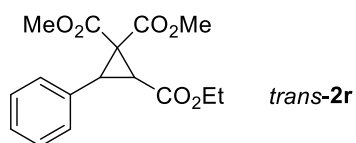

101 HMz, CDCl<sub>3</sub>

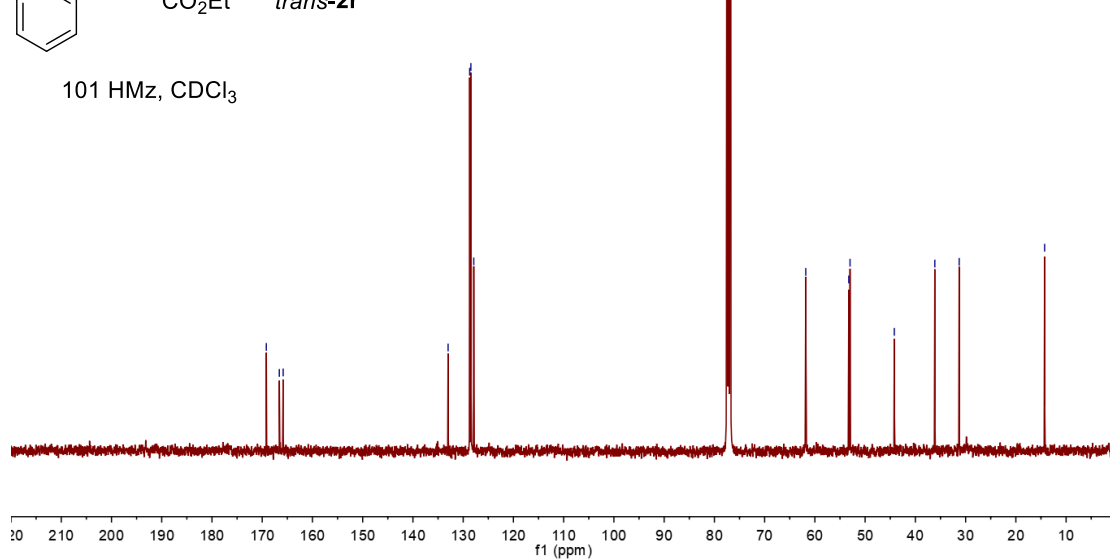

LAN-251126-OH  
single\_pulse

7.3010  
7.2974  
7.2826  
7.2695  
7.2647  
7.2394  
7.2447  
7.2276  
7.2201  
7.2164  
7.1989  
7.1925  
7.1814

3.9700  
3.9415  
3.8925  
3.8640  
3.5522  
3.5231  
3.4169  
3.3879

2.1719  
1.9962  
1.9809  
1.8838  
1.6660  
1.6486  
1.6310  
1.5391  
1.5204  
1.5023  
1.4854  
1.4689  
1.3873  
1.3713  
1.3546  
1.3520  
1.1178  
1.0994

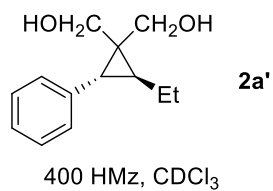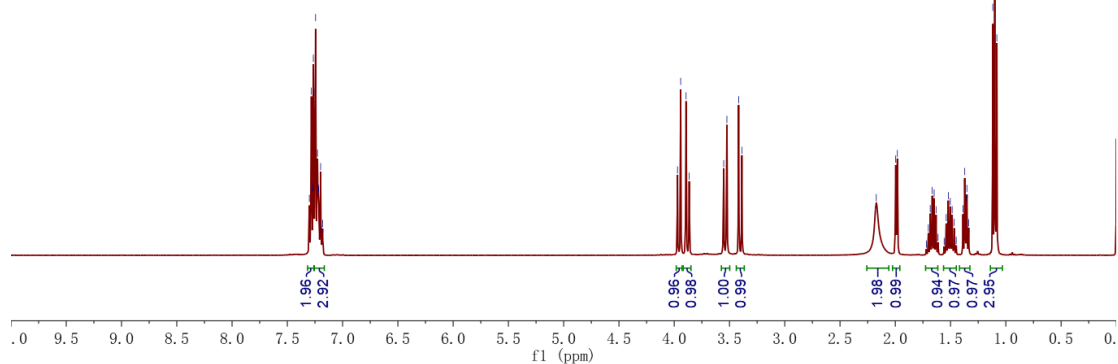

LAN251126-OH  
single pulse decoupled gated NOE

138.40  
128.92  
128.49  
126.49

77.37  
77.16  
76.95  
67.54  
66.67

34.94  
33.31  
28.90  
22.11

14.54

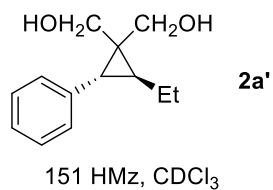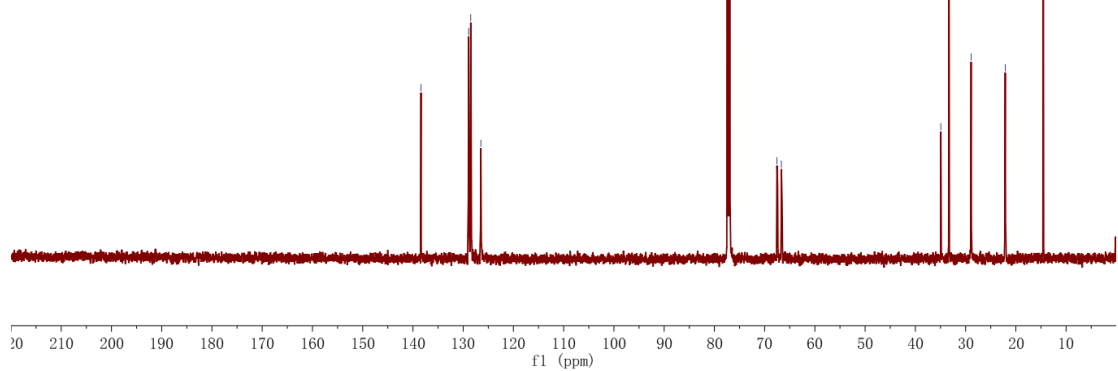

SSY250614-KH-C  
single\_pulse

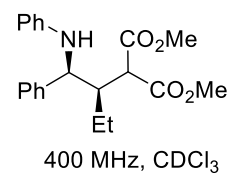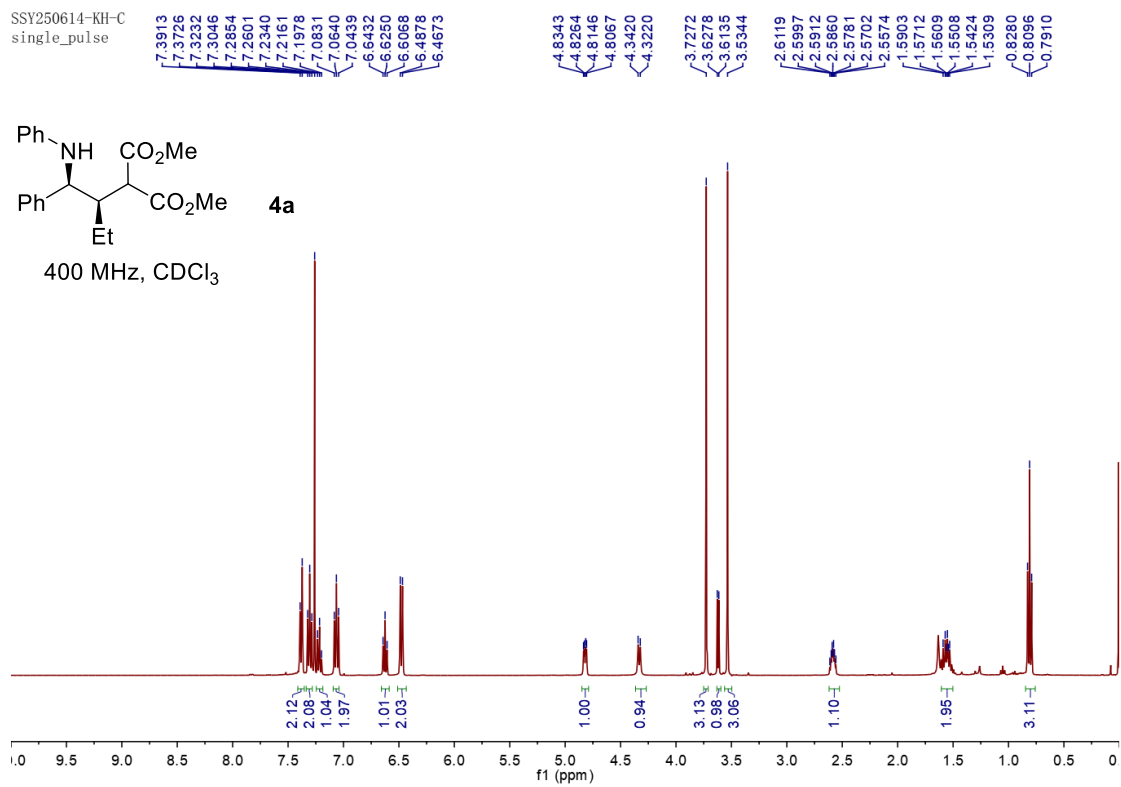

SSY250614-KH-C1  
single pulse decoupled gated

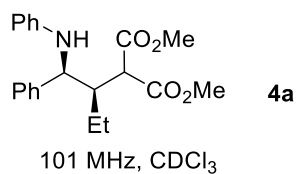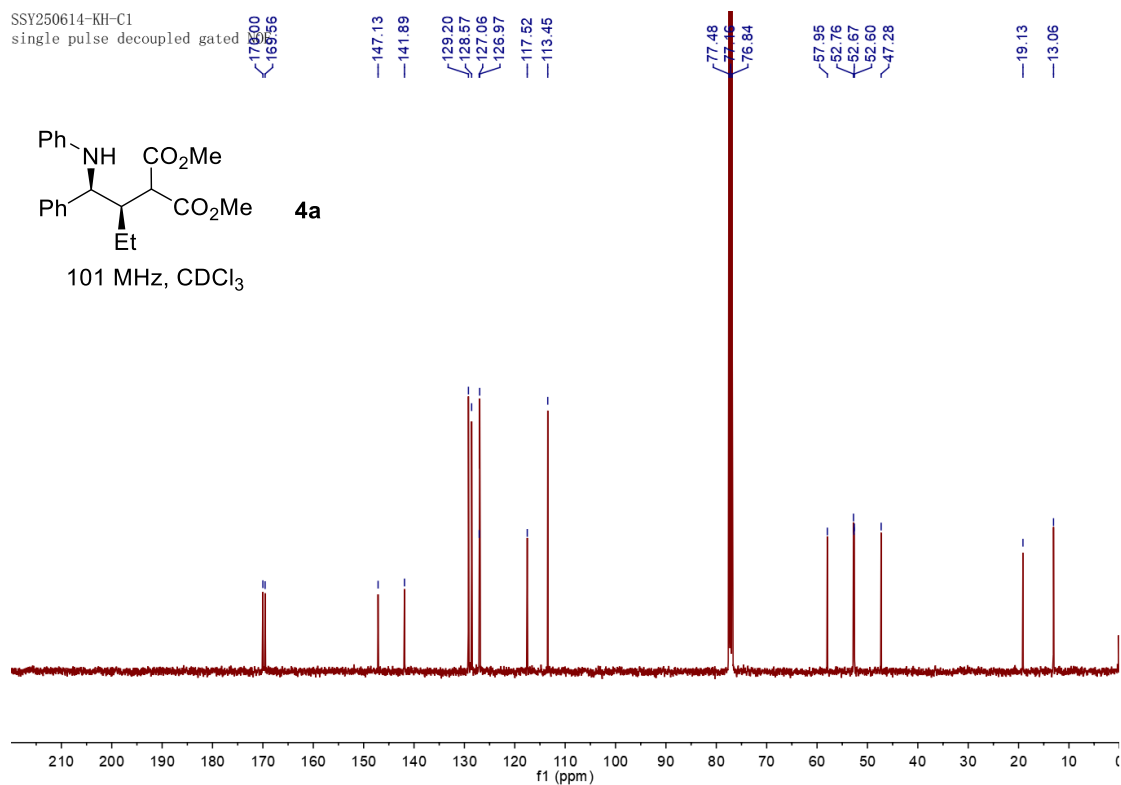

ssy250616-C1-KH-0

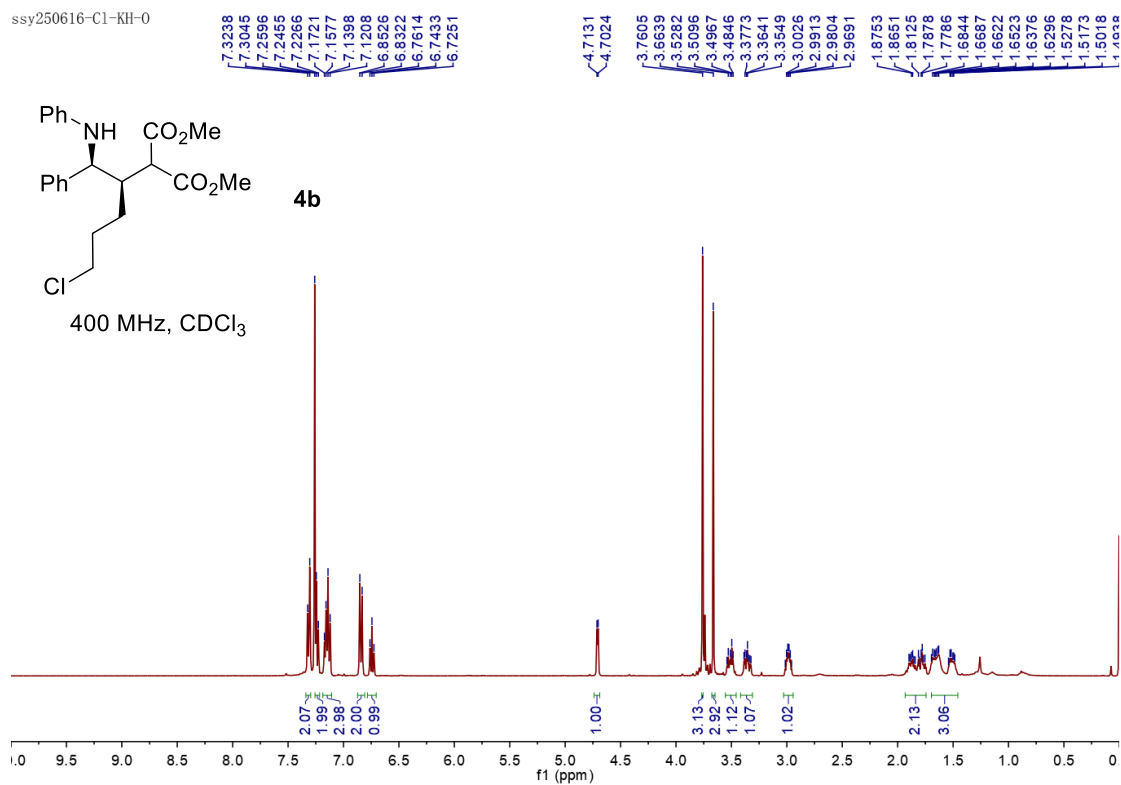

ssy250616-C1-KH-0-c

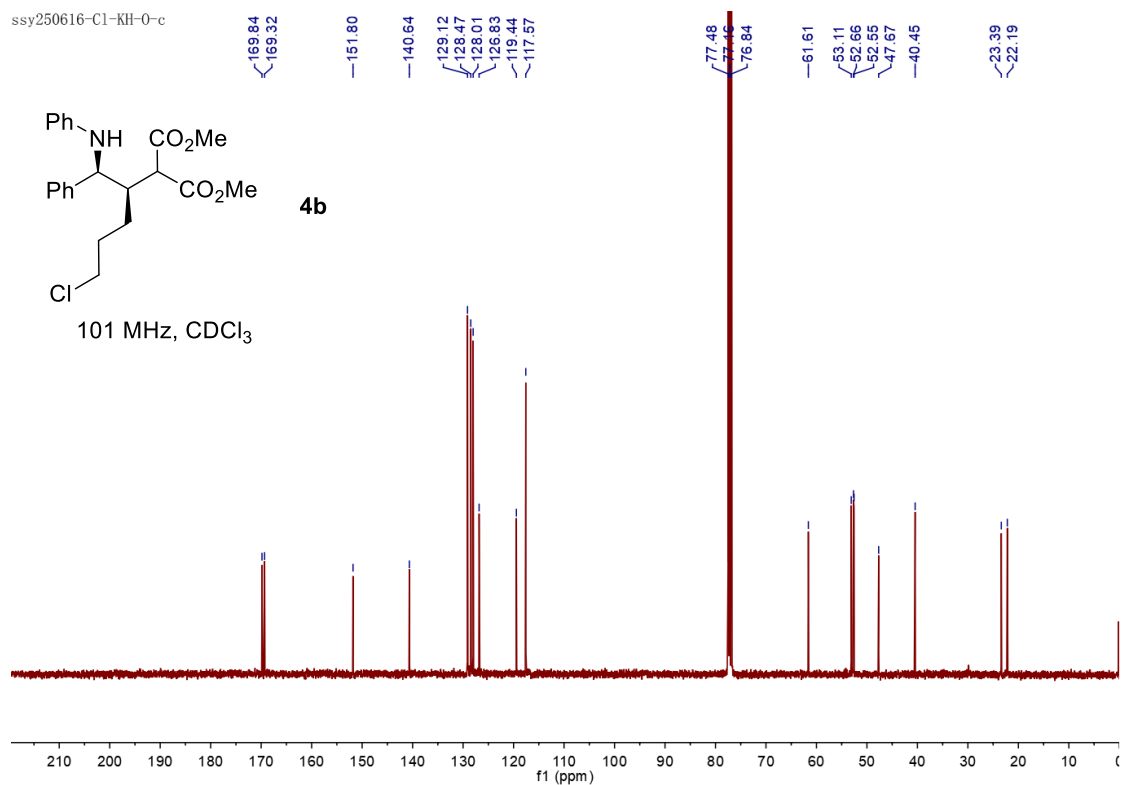



ssy251004-011  
single\_pulse

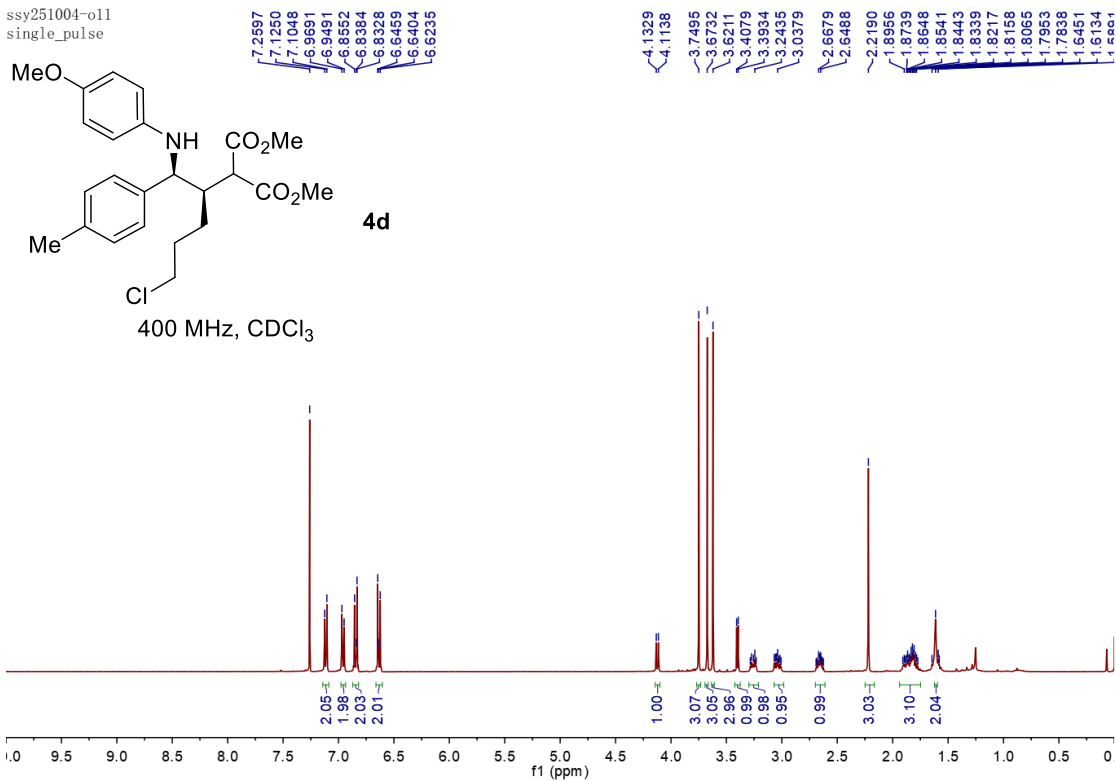

ssy251005-011-C-6h

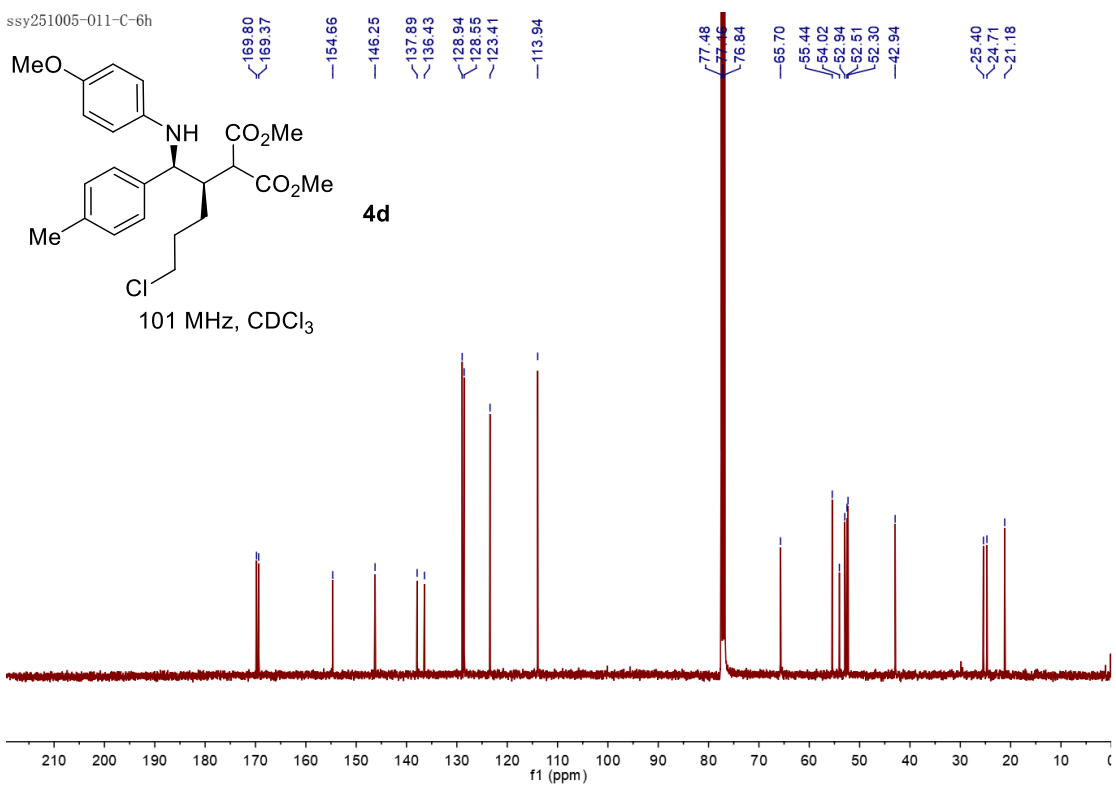

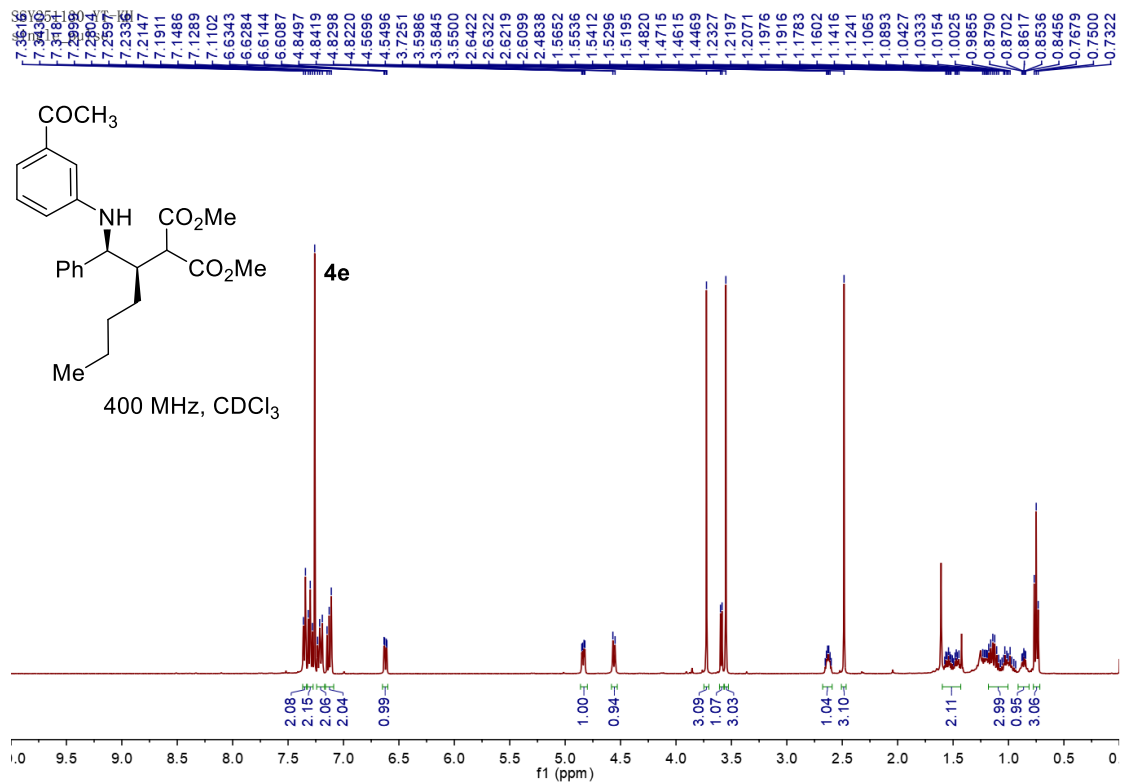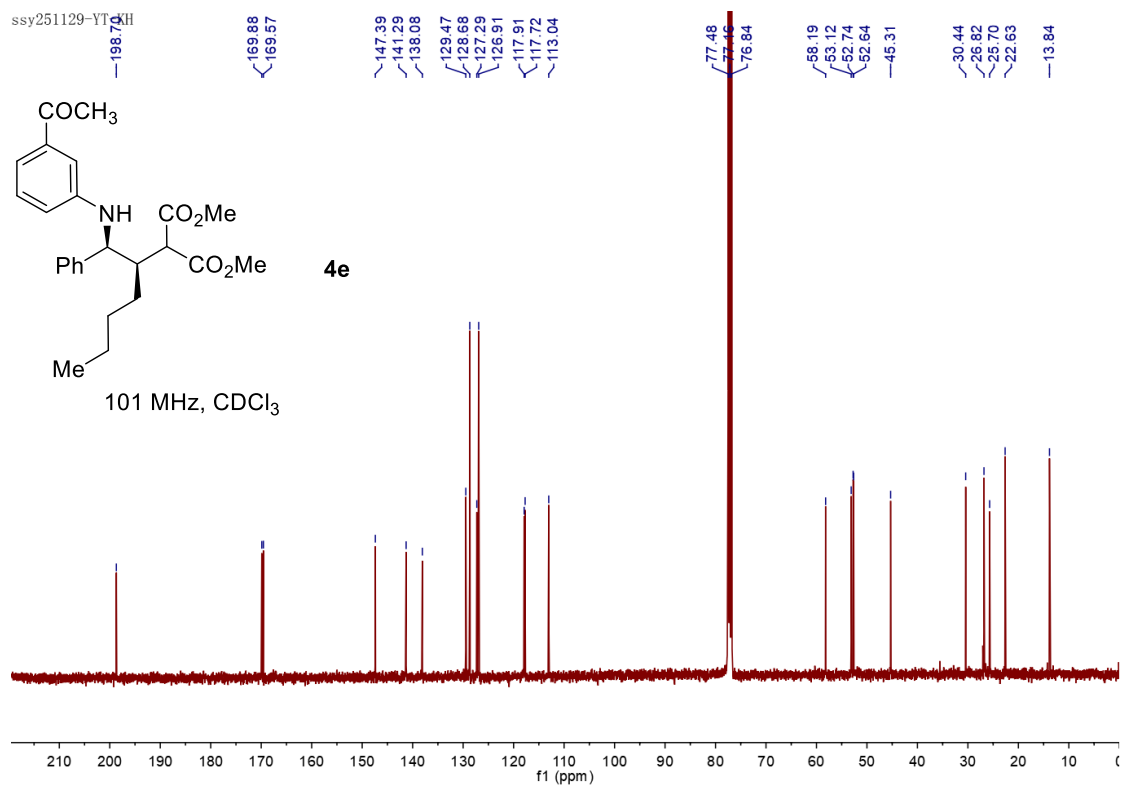

SSY251026-02-2  
single\_pulse

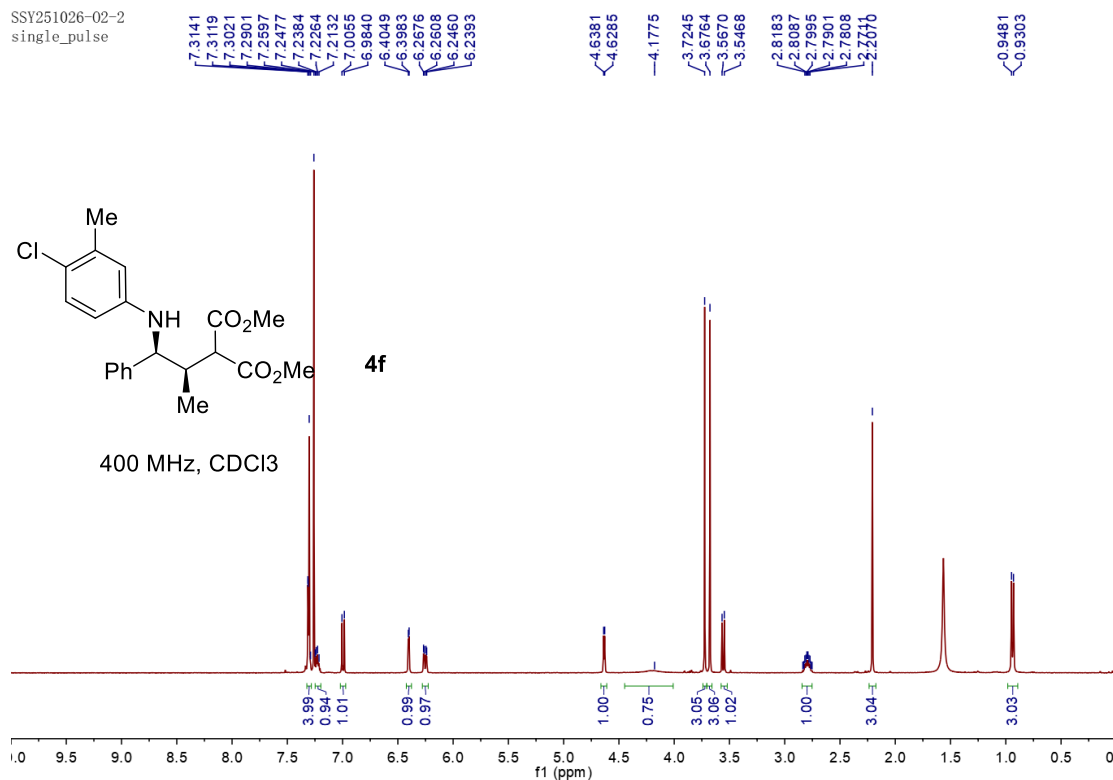

ssy251028-02-2-C-6h  
single pulse decoupled gated

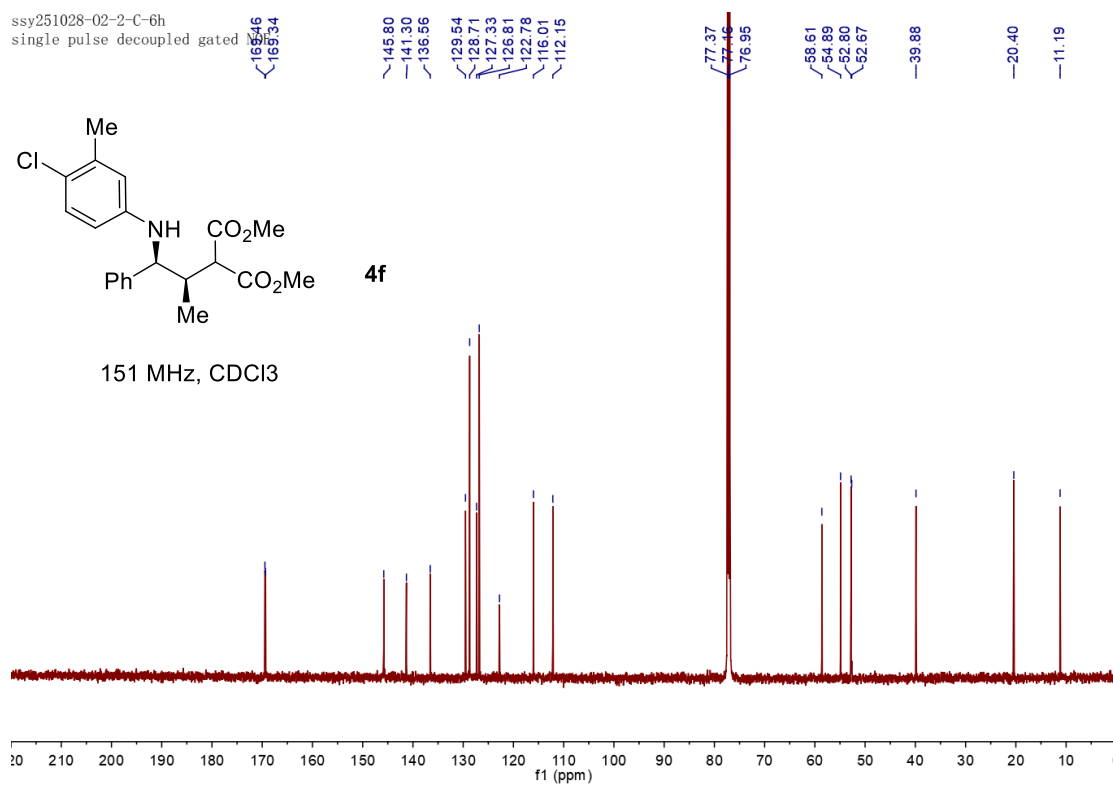

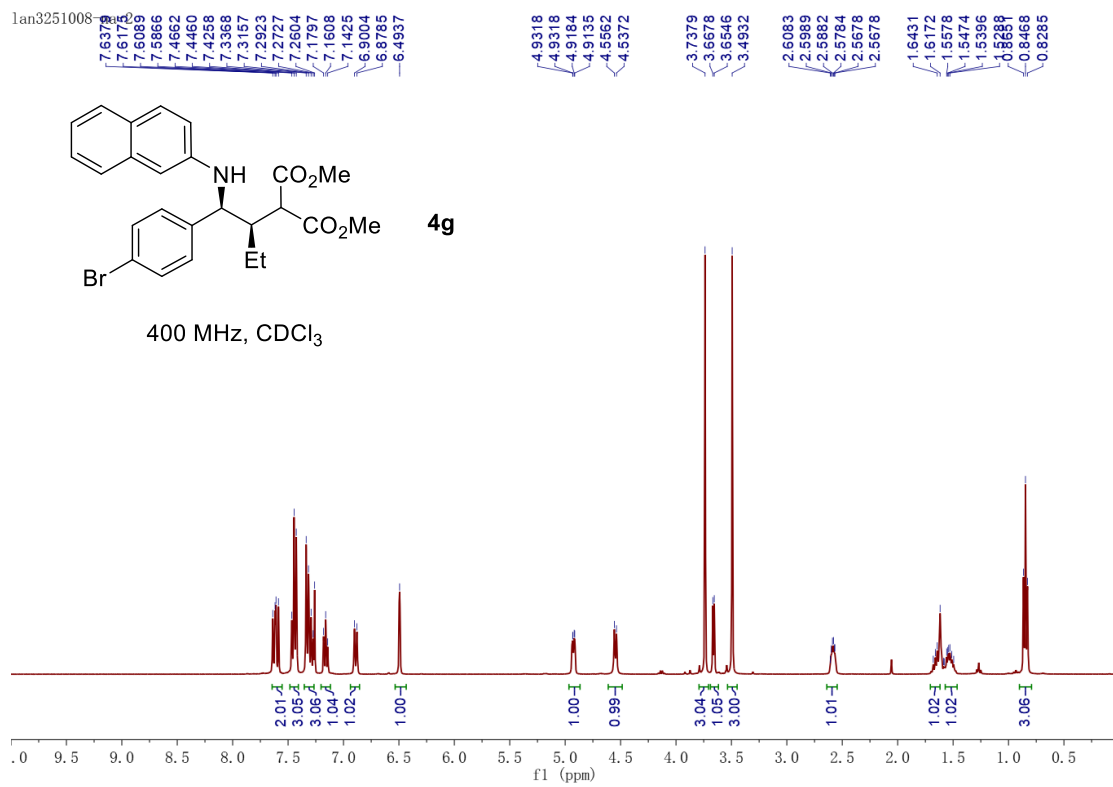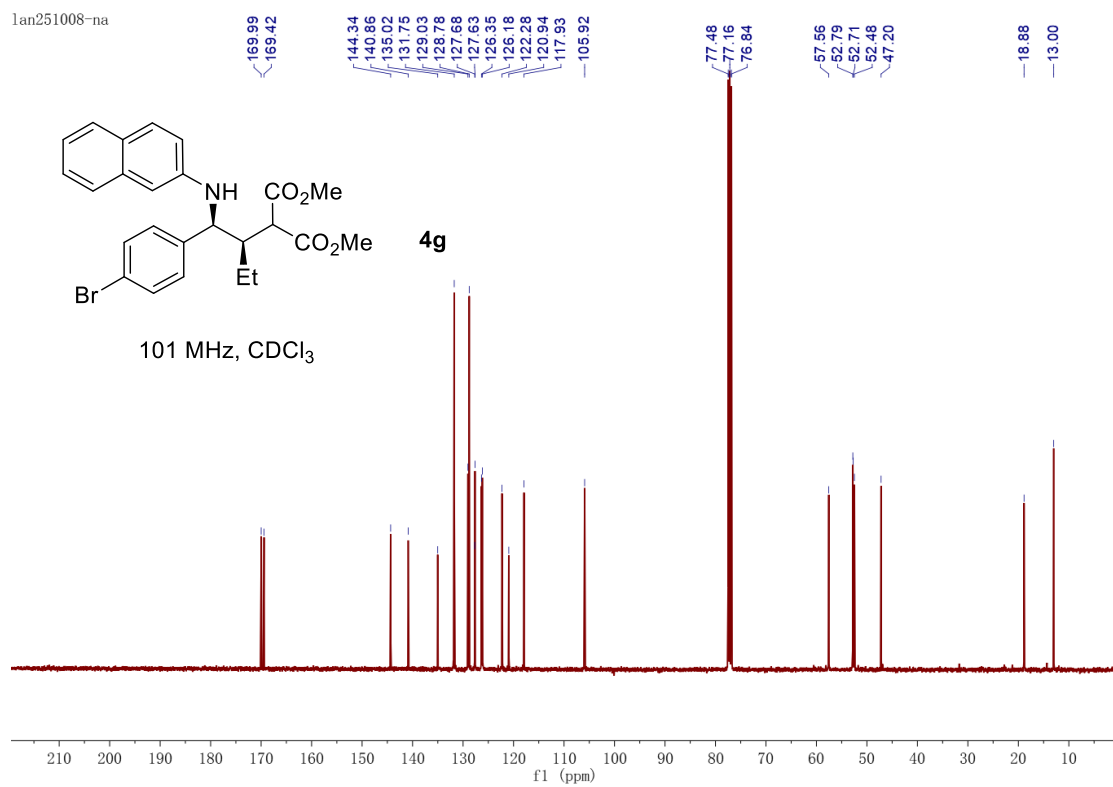

ssy250630-KH-R11

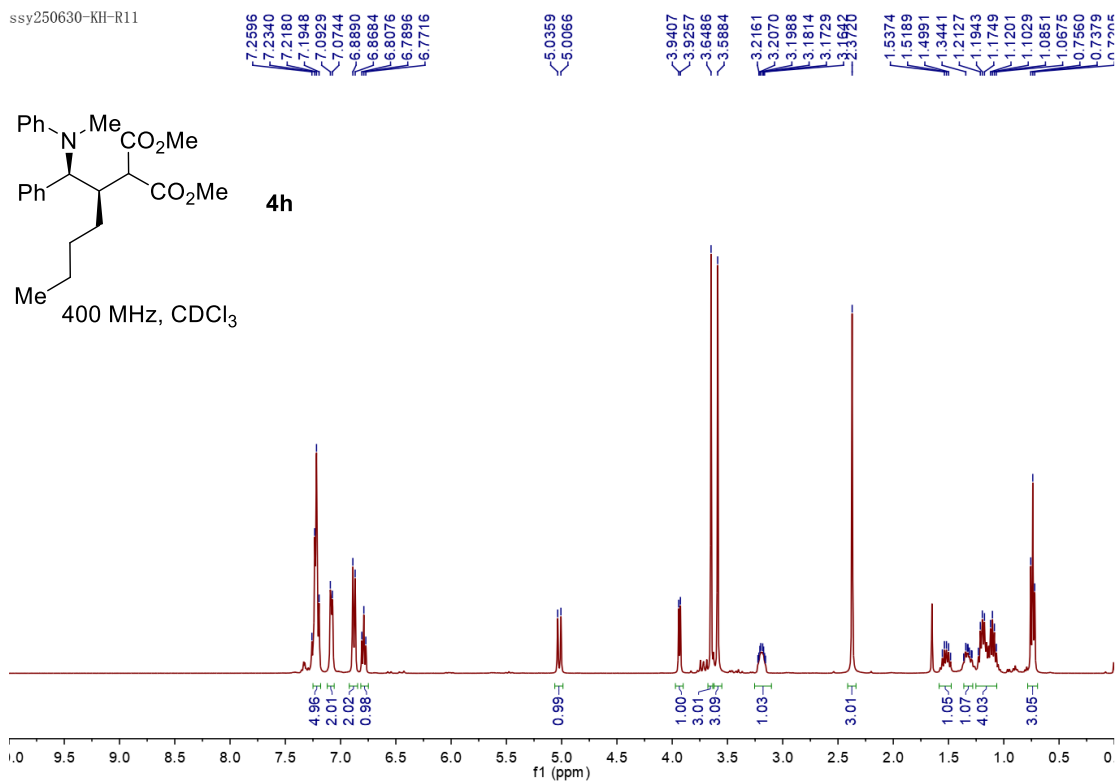

SSY250702-KH-R11-C 1  
single pulse decoupled gated

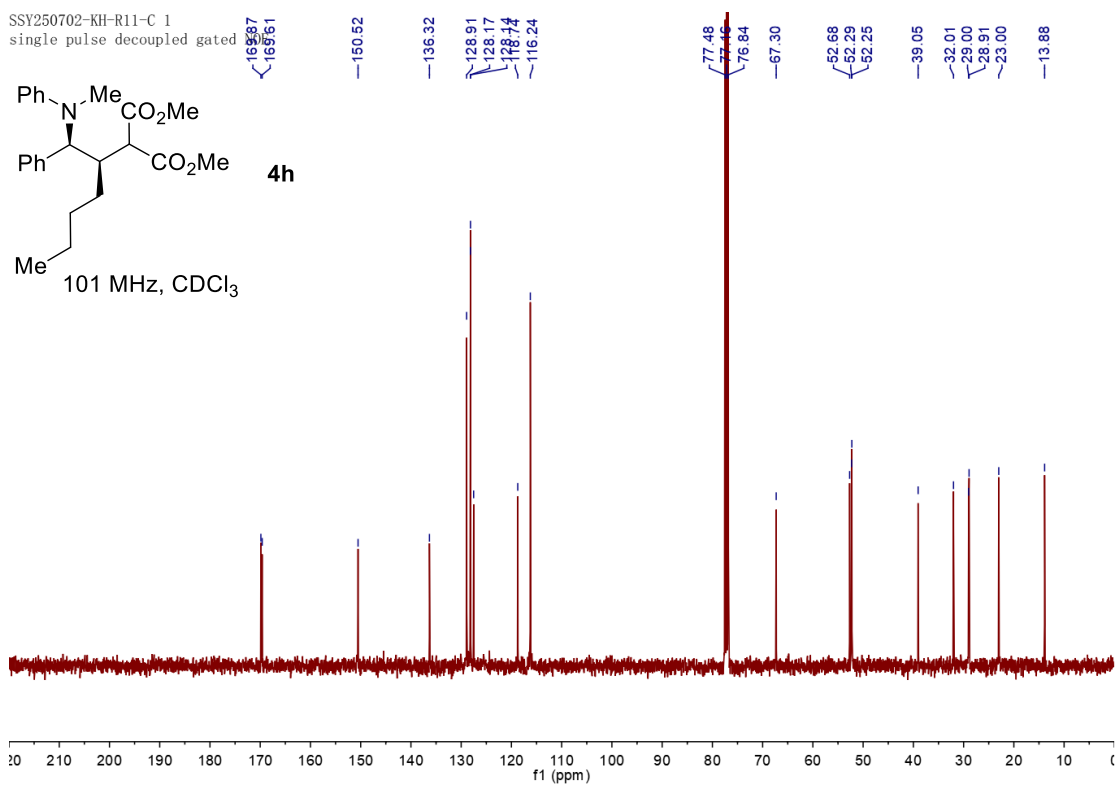

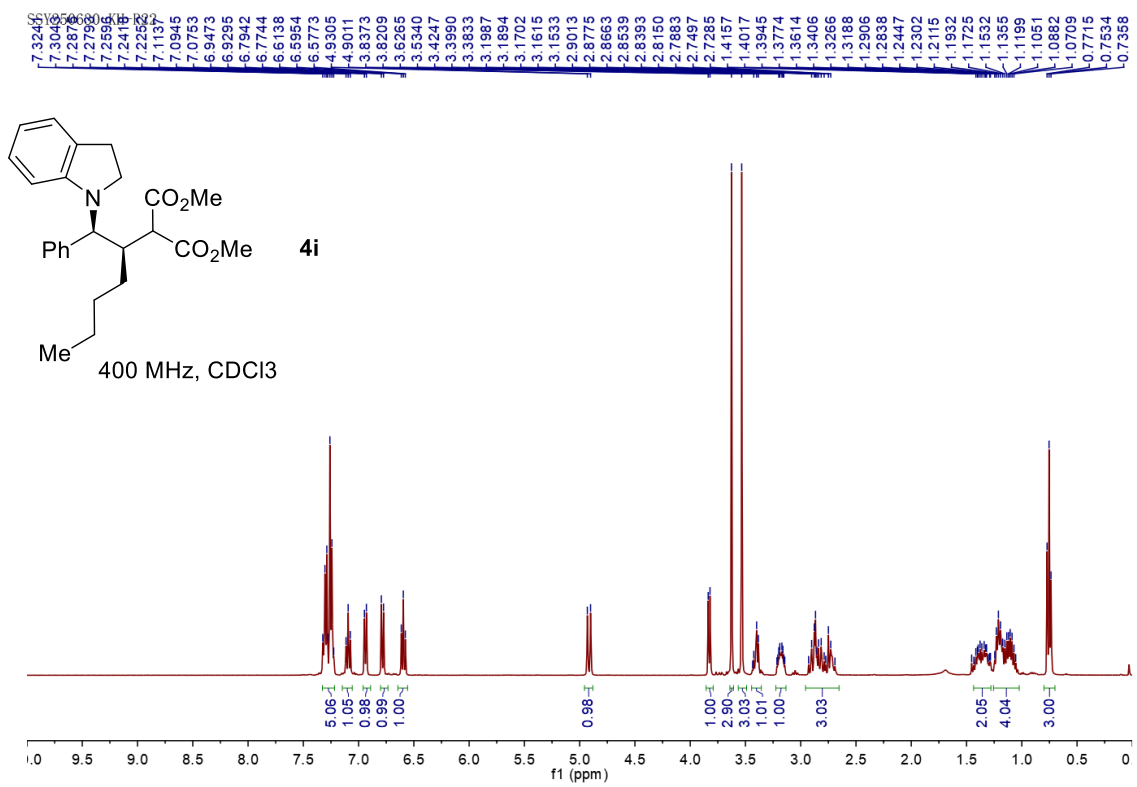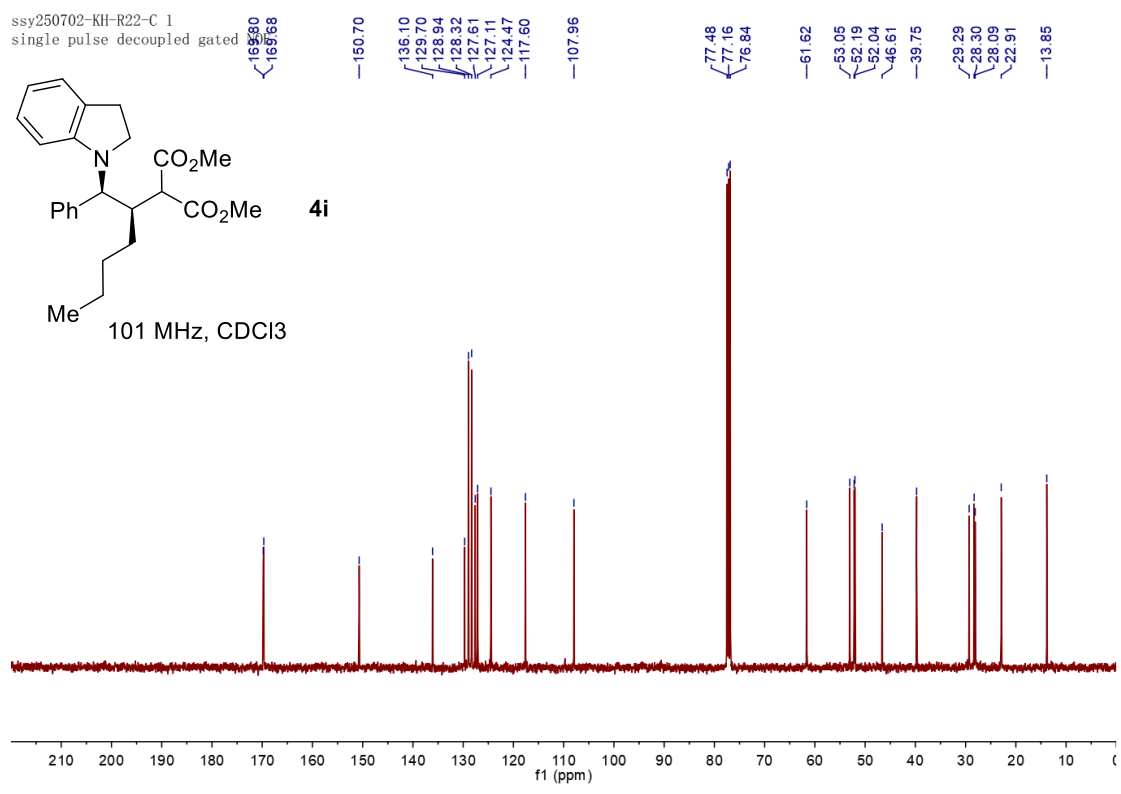

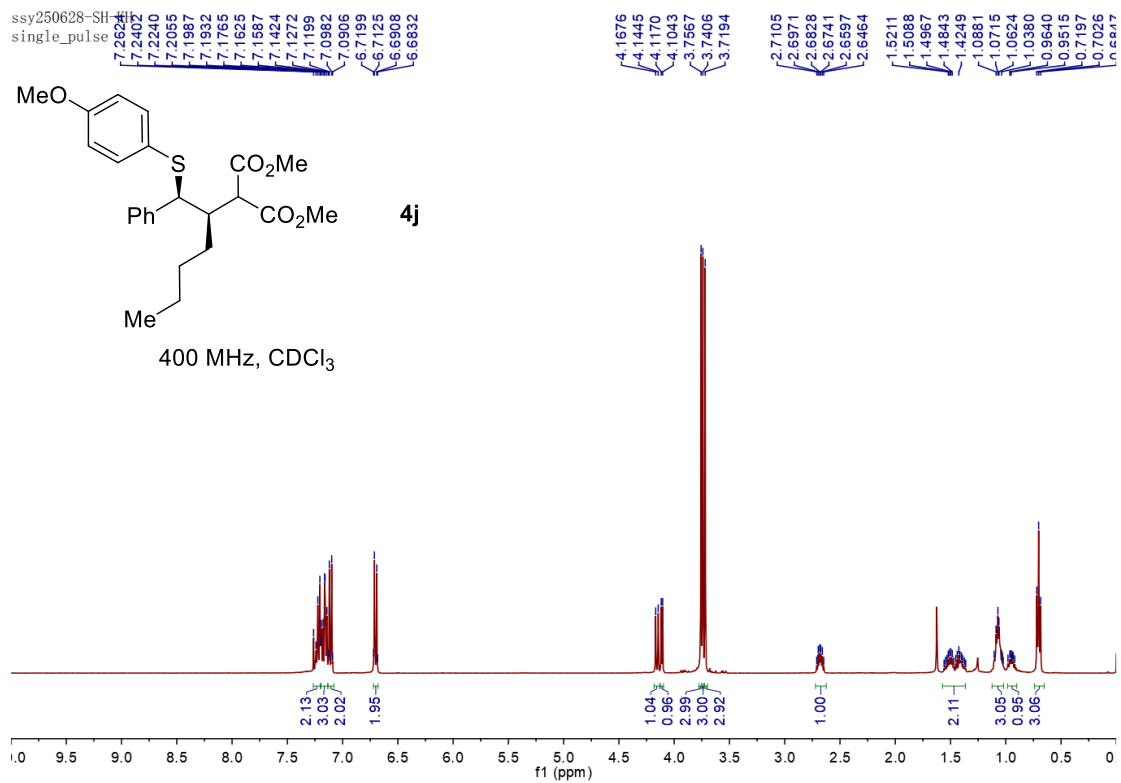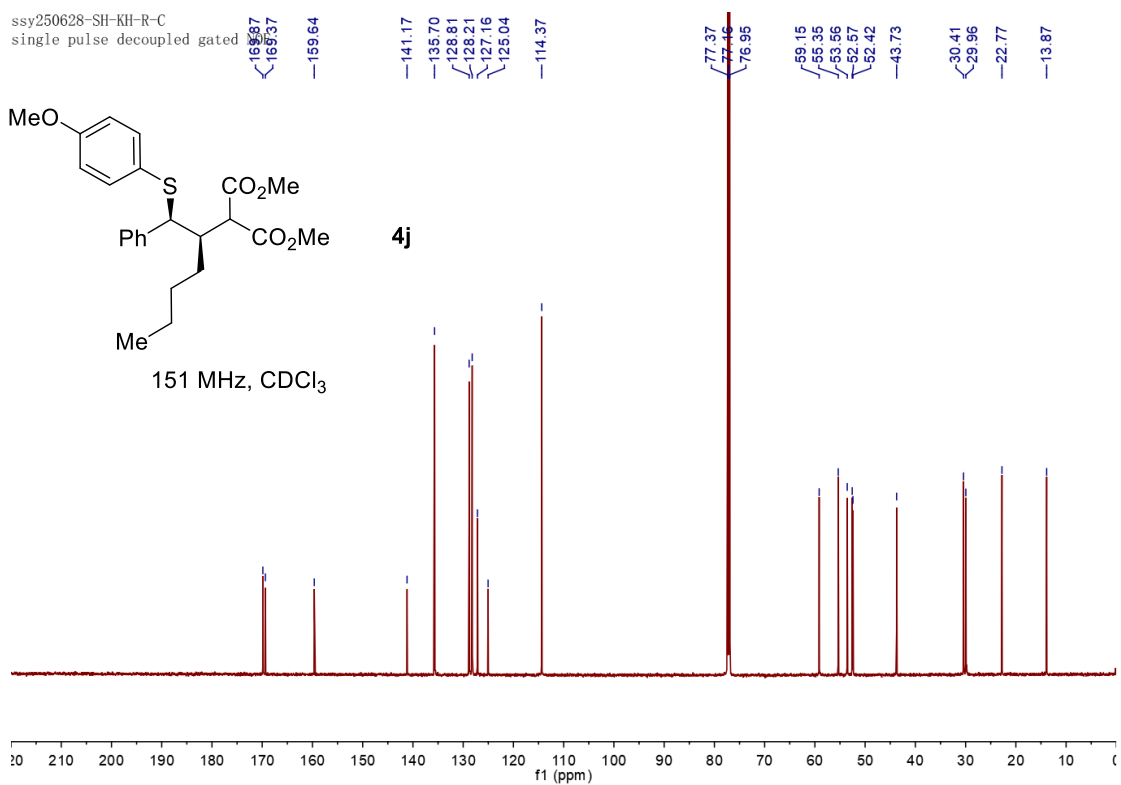



ssy-250605-ome

7.3538  
7.3420  
7.3207  
7.3101  
7.2920  
7.2599  
7.1713  
7.1533  
6.7630  
6.7407  
5.1642  
5.1439  
3.8365  
3.7149  
3.5763  
3.5474  
3.2038  
3.1842  
3.1683  
3.1553  
3.1395  
3.1191  
1.2502  
1.2286  
1.2111  
1.1944  
1.1776  
1.1613  
0.9289  
0.9099  
0.8940  
0.8747  
0.8548  
0.8363  
0.8185  
0.8004

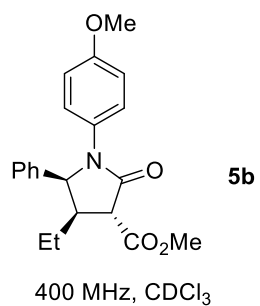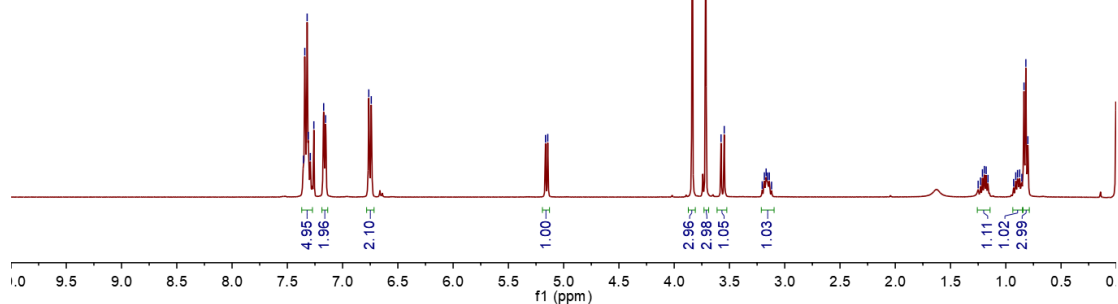

ssy250606-0Me-C

170.90  
169.43  
157.11  
137.27  
131.27  
129.02  
128.43  
127.23  
123.71  
114.09  
77.46  
77.46  
76.84  
66.88  
55.47  
54.26  
52.92  
43.88  
23.68  
12.08

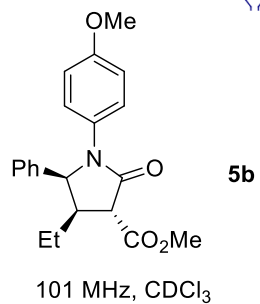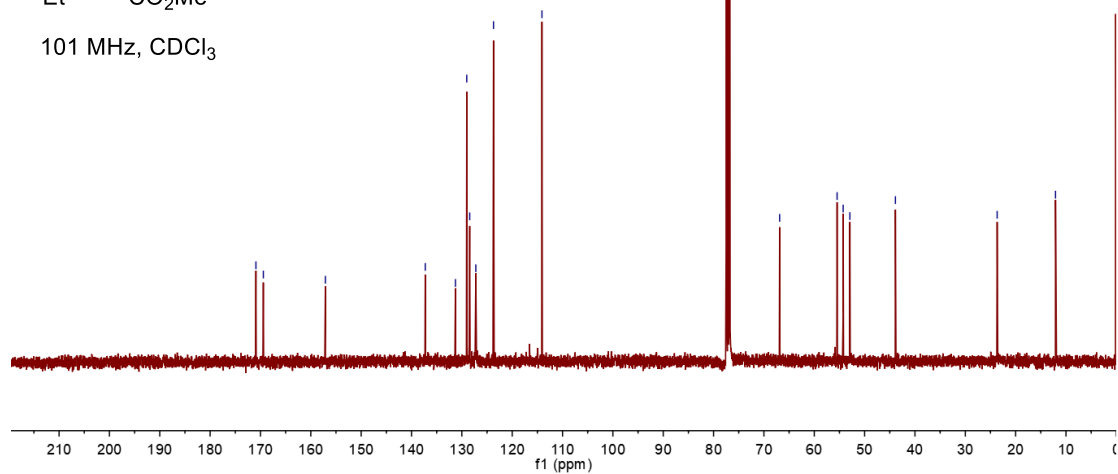

SSY250914-Cl-CH  
single\_pulse

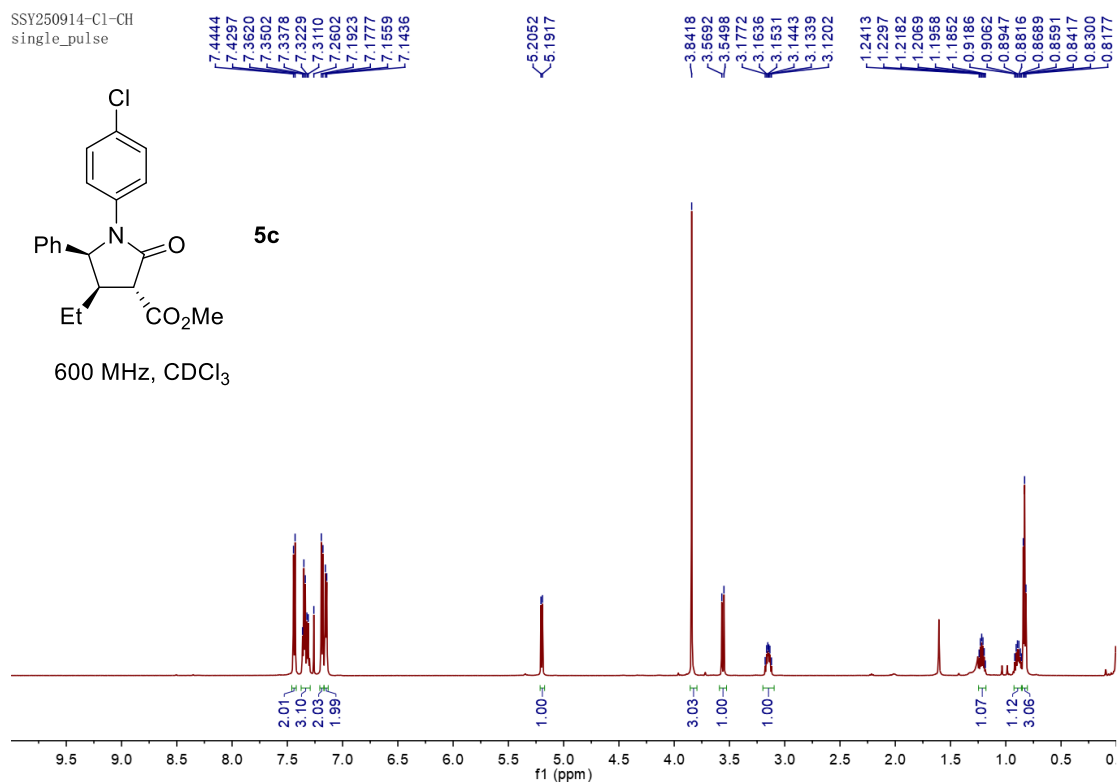

ssy250909-cl-ch-11

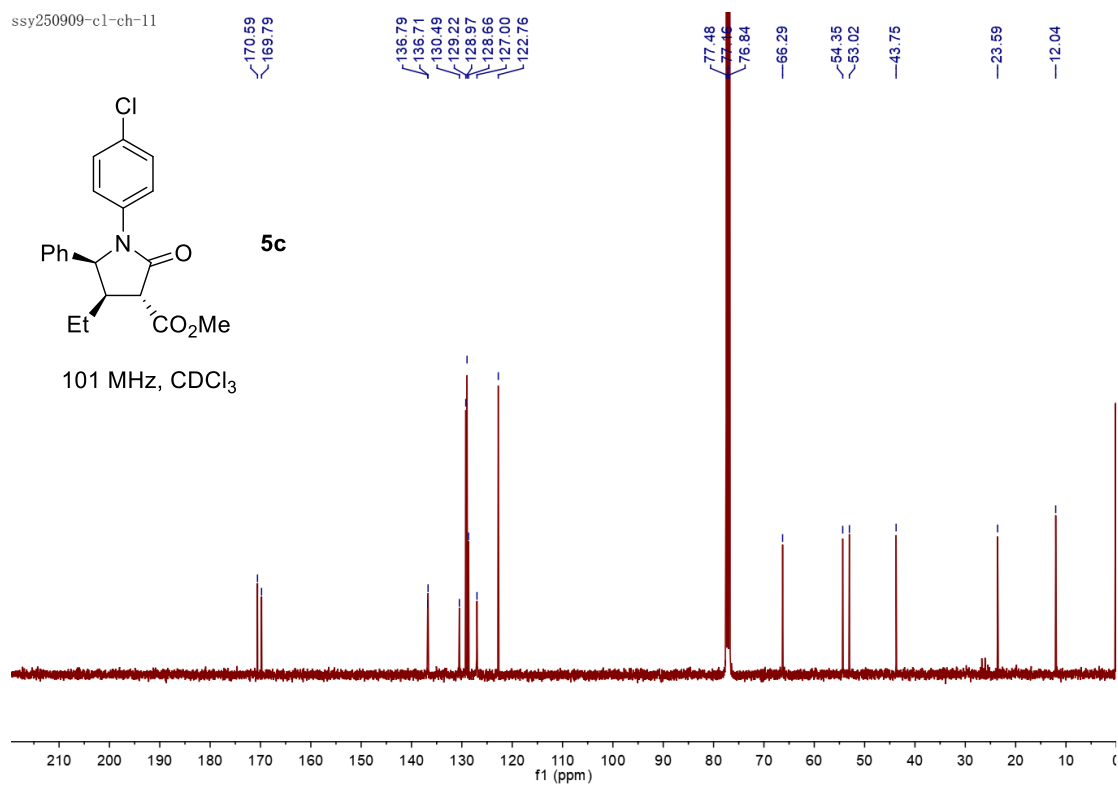

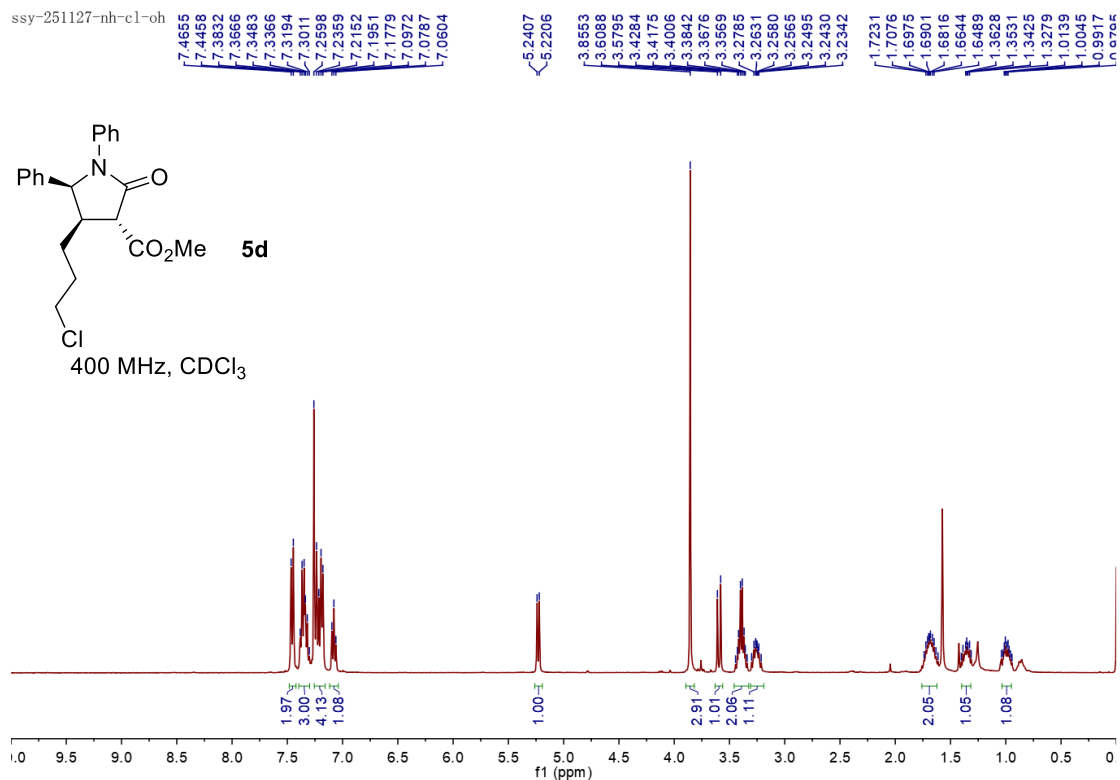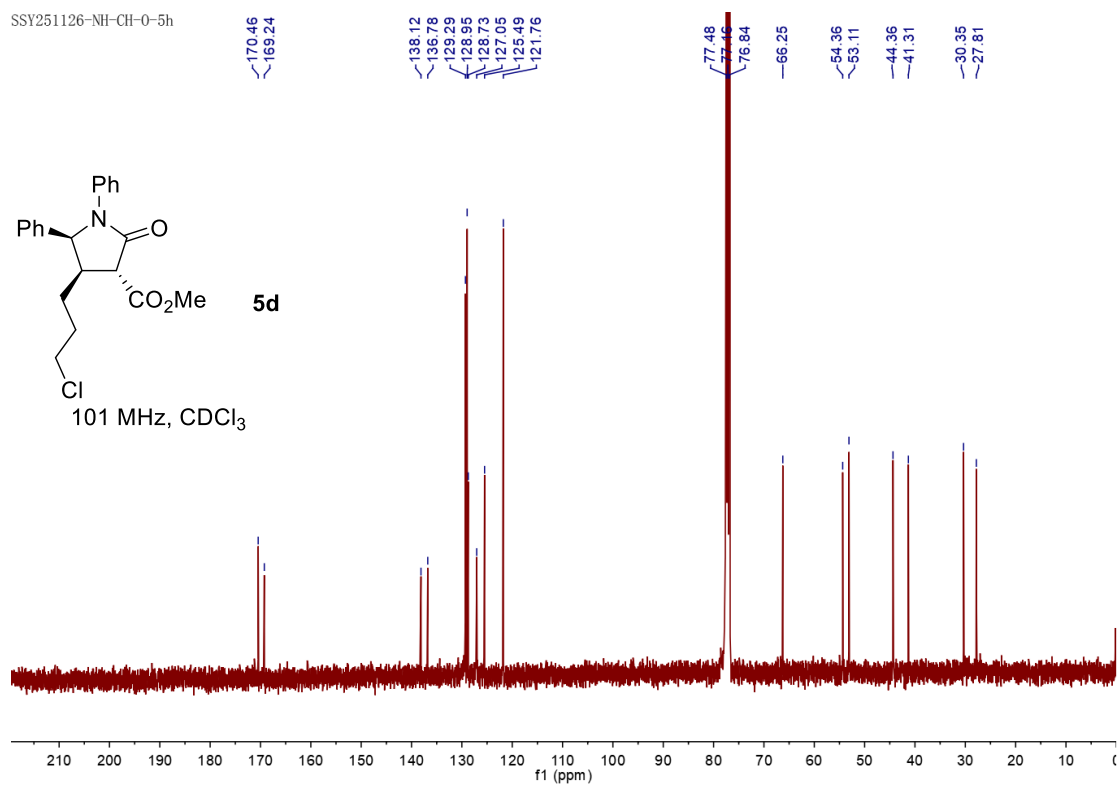

ssy251023-Me-CH  
single\_pulse

7.3834  
7.3780  
7.3661  
7.3605  
7.3522  
7.3333  
7.3181  
7.3006  
7.2603  
7.1597  
7.1563  
7.1392  
6.7843  
6.7756  
6.7702  
6.7583  
6.7528  
6.7440

5.1330  
5.1129

3.6384  
3.7235  
3.4802  
3.4510  
3.3315  
3.3144  
3.2964  
3.2852  
3.2774  
3.2674  
3.2483  
3.2310

0.7521  
0.7349

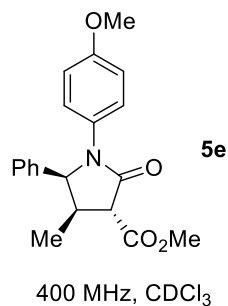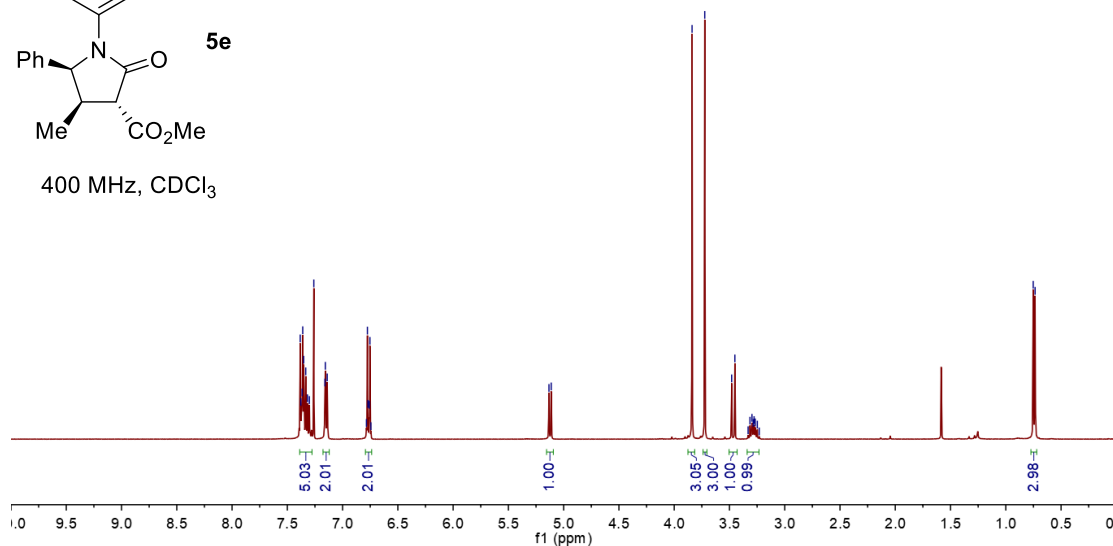

SSY251022-Me-CH-C-4h  
single pulse decoupled gated

175.10  
169.27  
157.02  
136.79  
131.41  
129.07  
128.42  
127.01  
123.43  
114.09

77.48  
77.16  
76.84

67.10

55.48  
55.10  
52.90

36.88

15.07

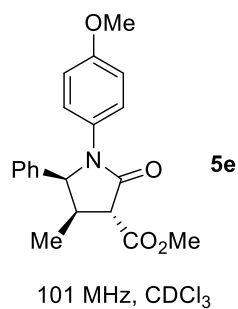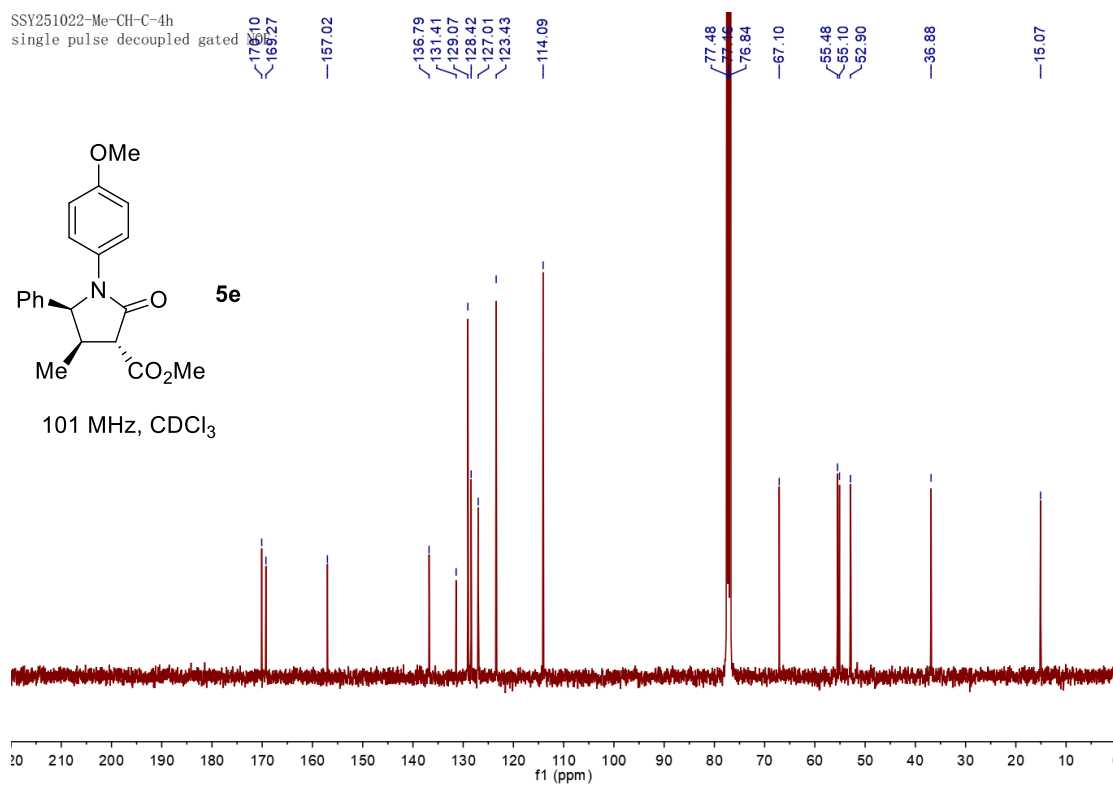

SSY251109-C1-CH3  
single\_pulse

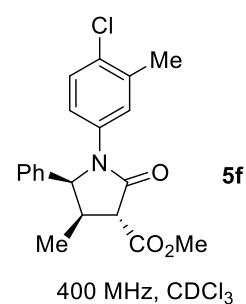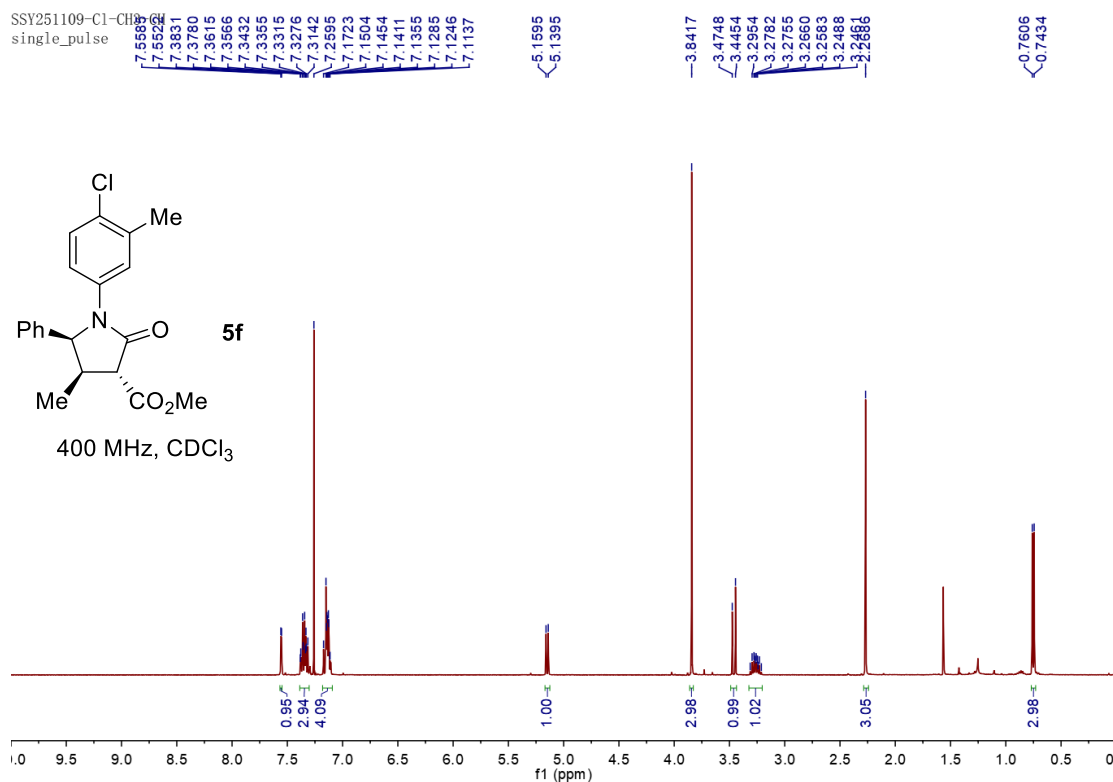

ssy251106-C1-CH3-5h

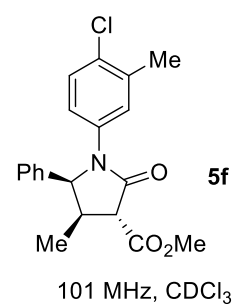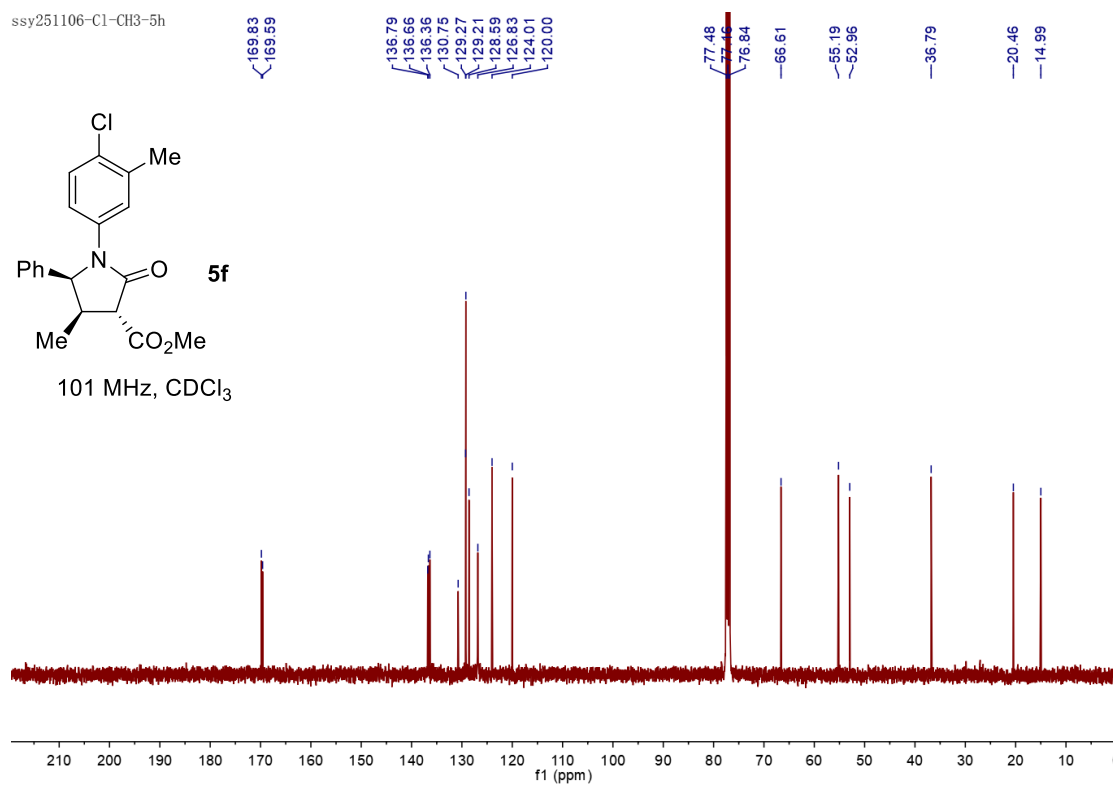

ssy-251127-o6-ch

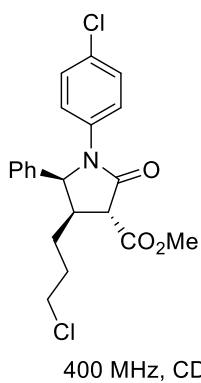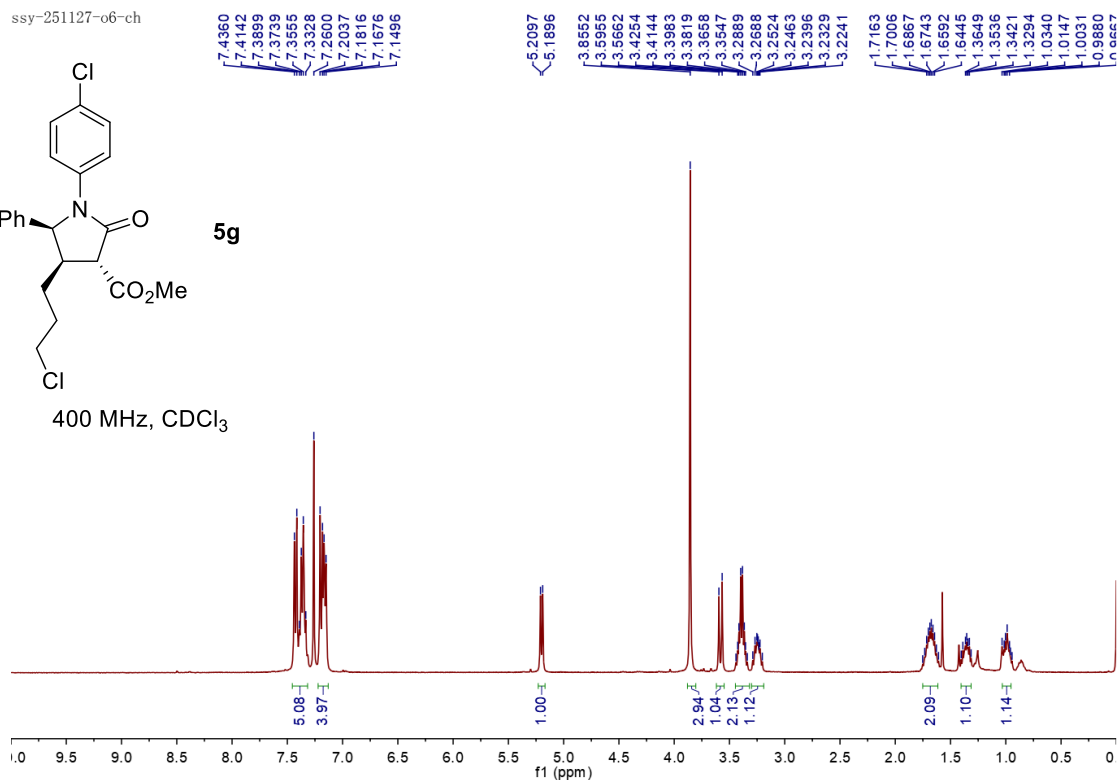

ssy251123-06-CH

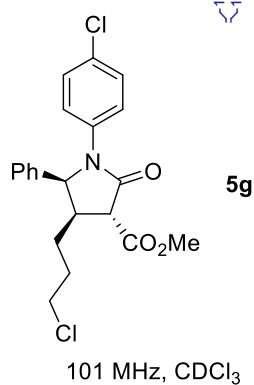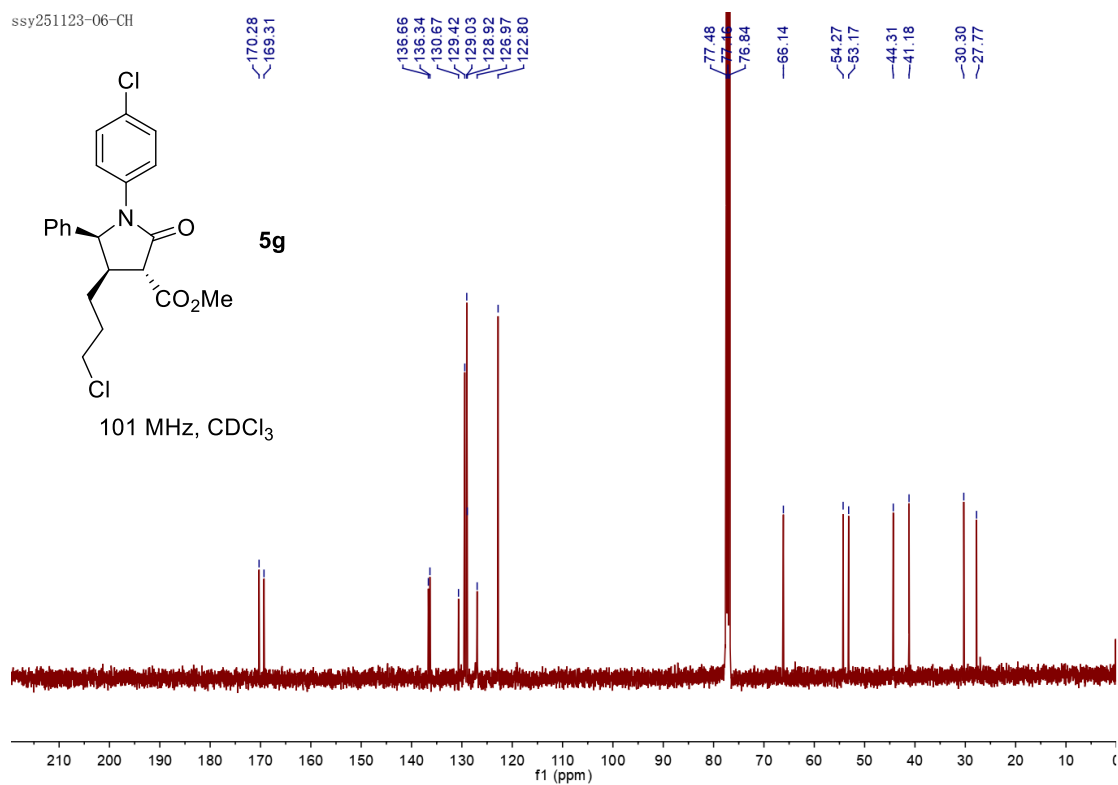

SSY2511118-dj-Cl-CH  
single\_pulse

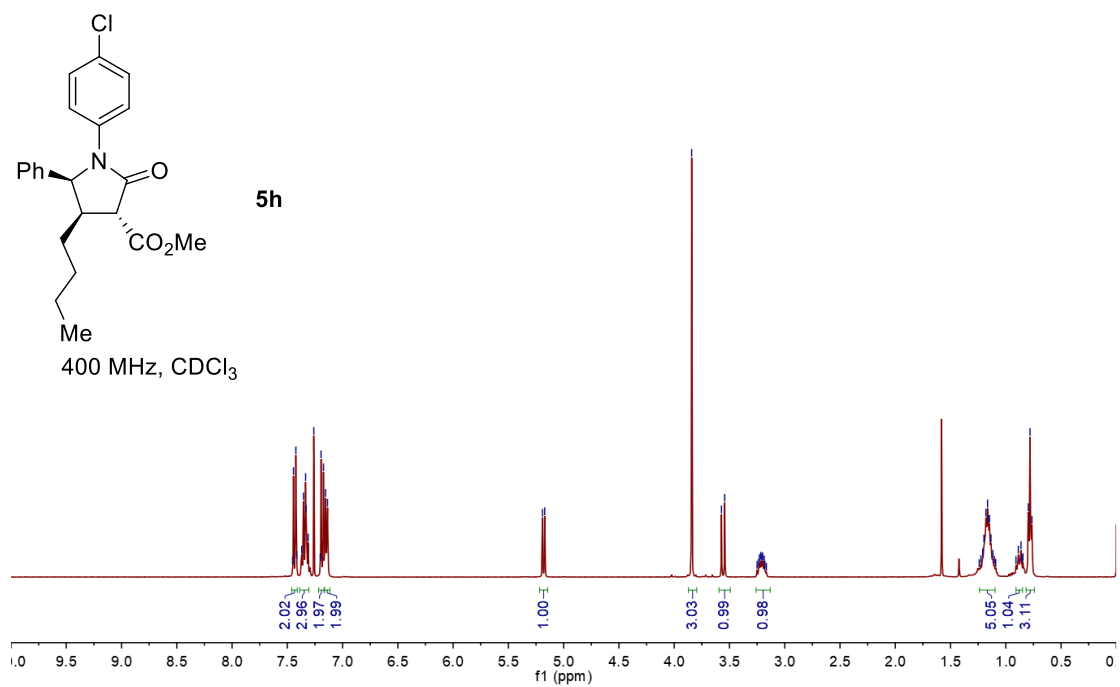

ssy2511116-08-1-C

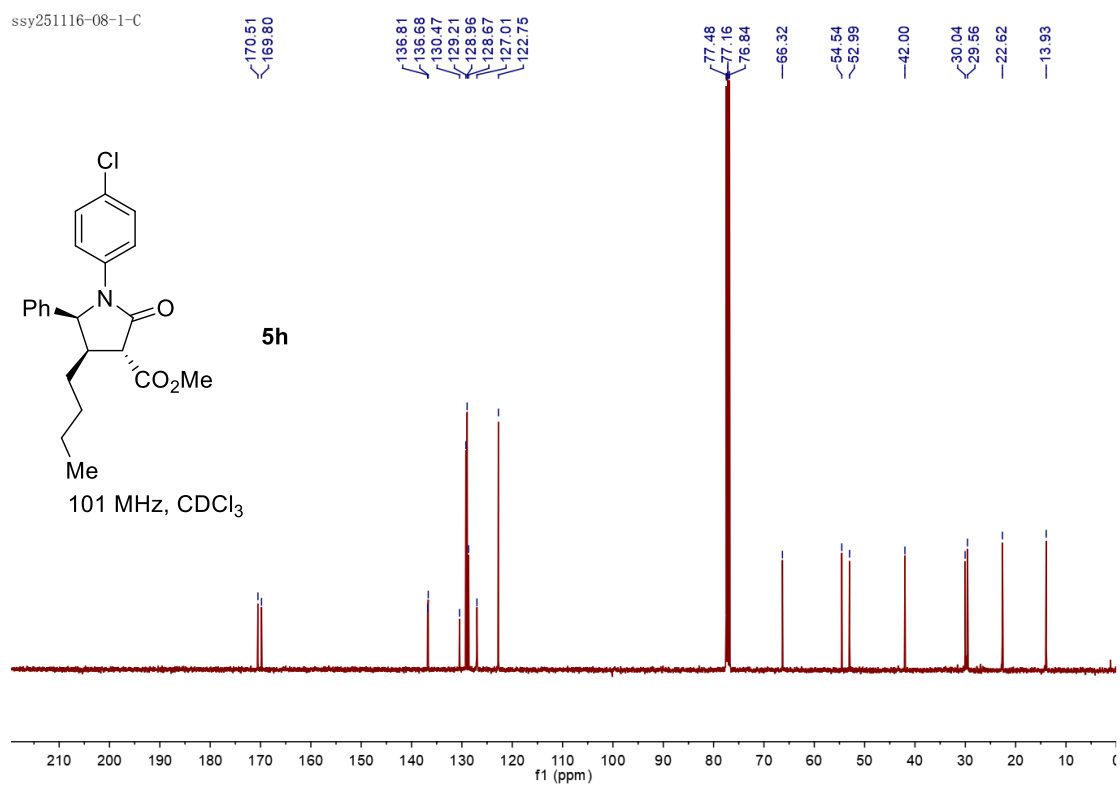

SSY251104-2Cl-CH  
single\_pulse

7.4200  
7.4063  
7.2939  
7.2788  
7.2600  
7.0116  
6.9988  
6.9979  
6.9949  
6.7912  
6.7761  
5.1415  
5.1278  
3.8397  
3.7335  
3.5232  
3.5042  
3.2049  
3.1949  
3.1906  
3.1860  
3.1808  
3.1764  
3.1719  
3.1664  
3.1622  
3.1476  
1.2274  
1.2166  
1.2047  
1.1933  
1.1823  
0.9429  
0.9306  
0.9190  
0.9071  
0.8963  
0.8926  
0.8497  
0.8376

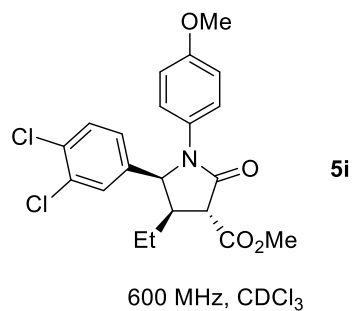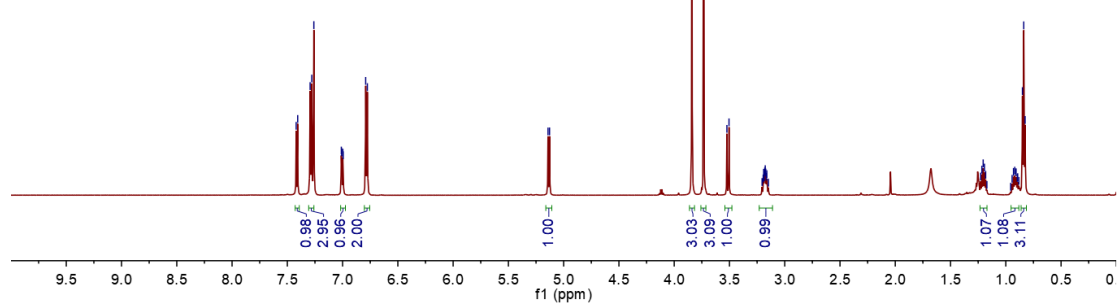

ssy251106-2Cl-CH-290z

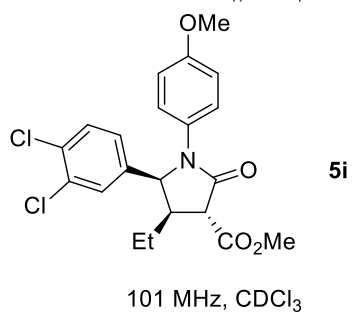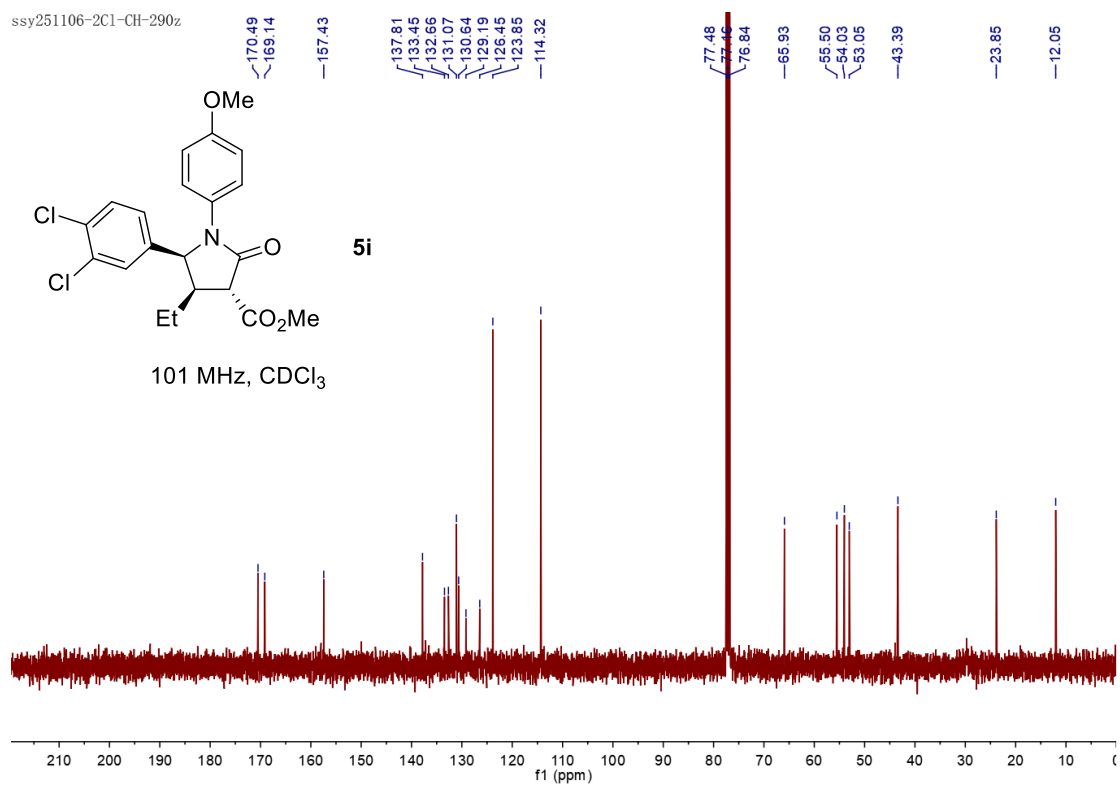

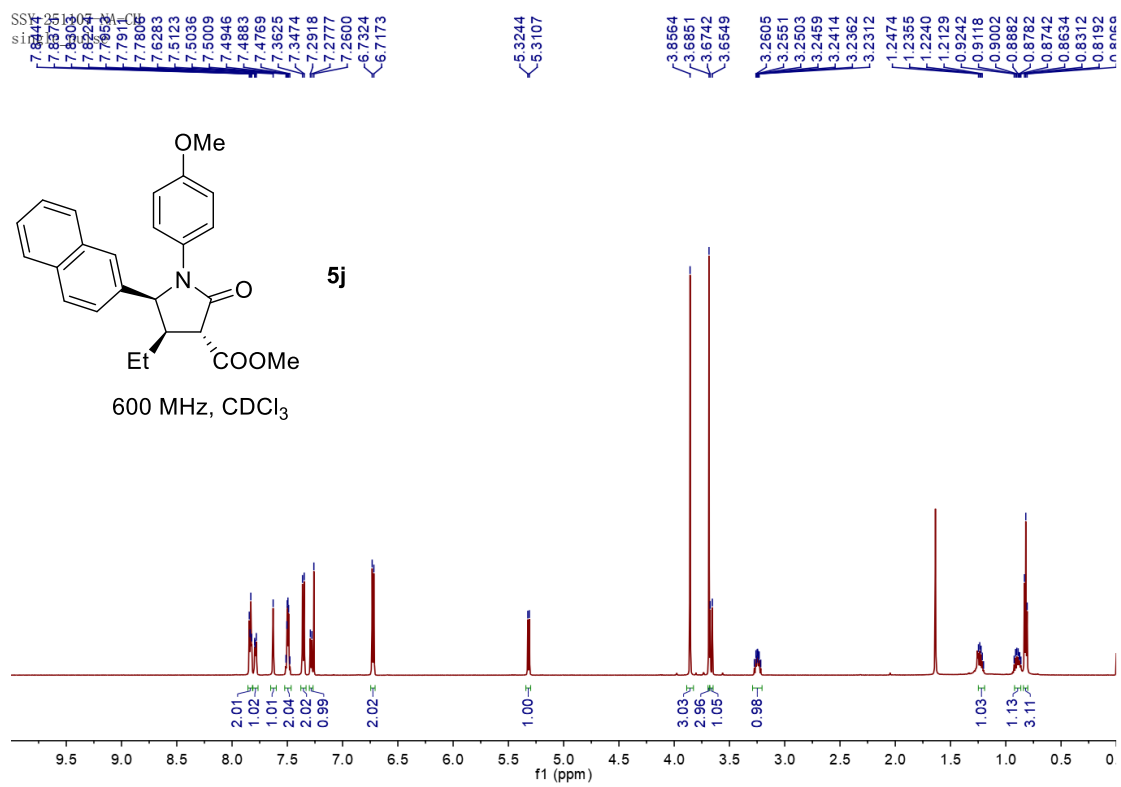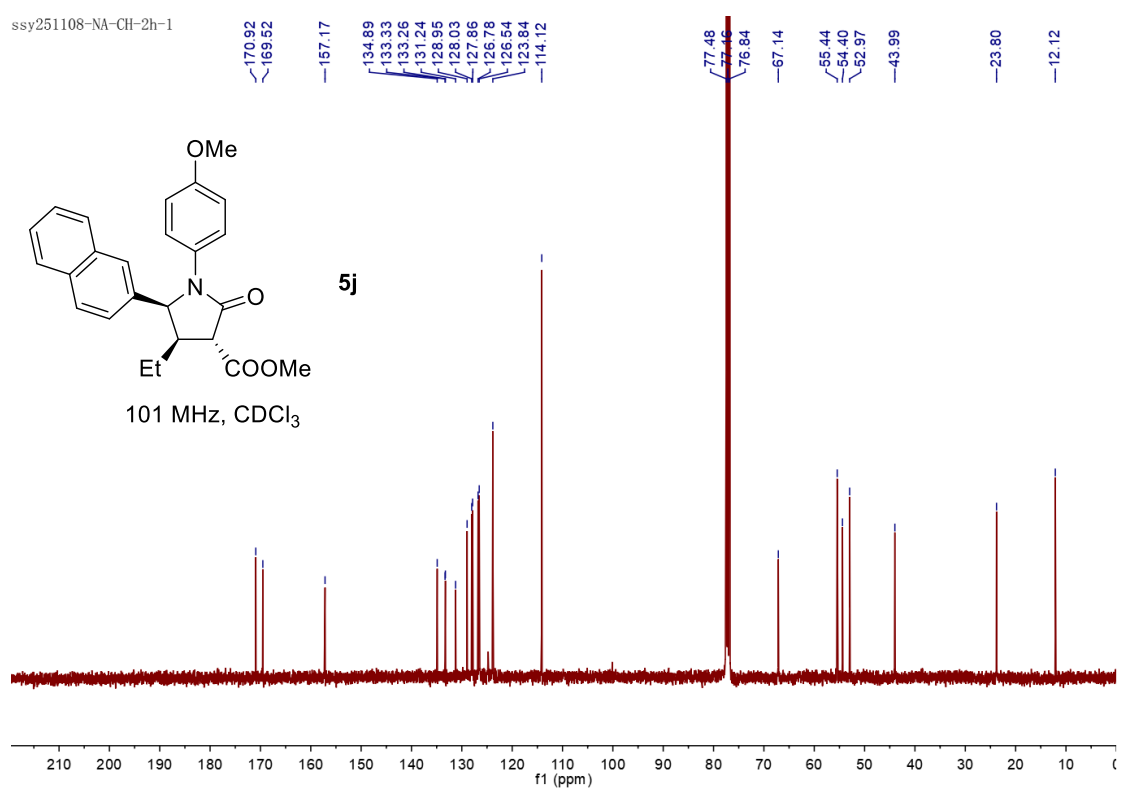

## X. HPLC Spectra for ee Determination.

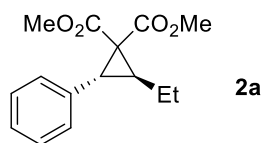

### <Chromatogram>

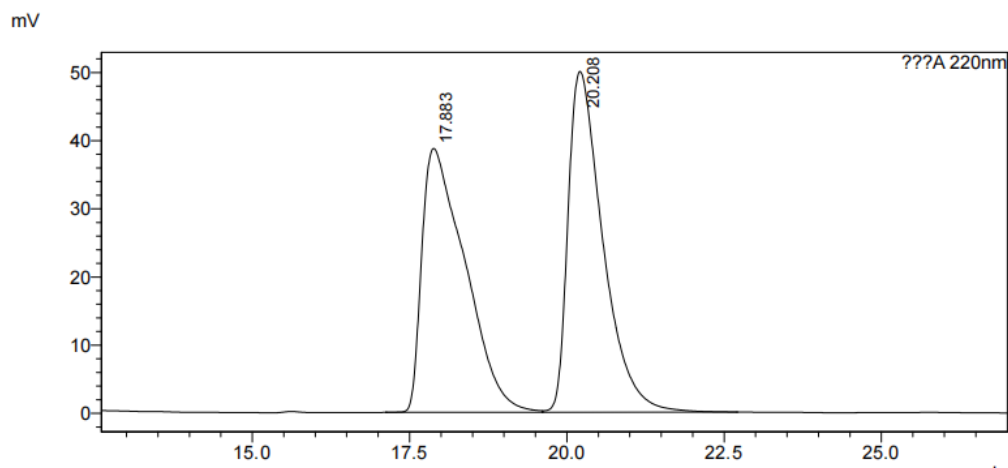

### <Peak Table>

??A 220nm

| Peak# | Ret. Time | Area    | Height | Conc.  | Unit | Mark | Name |
|-------|-----------|---------|--------|--------|------|------|------|
| 1     | 17.883    | 1854898 | 38707  | 49.038 |      |      |      |
| 2     | 20.208    | 1927674 | 49998  | 50.962 |      | V    |      |
| Total |           | 3782572 | 88705  |        |      |      |      |

### <Chromatogram>

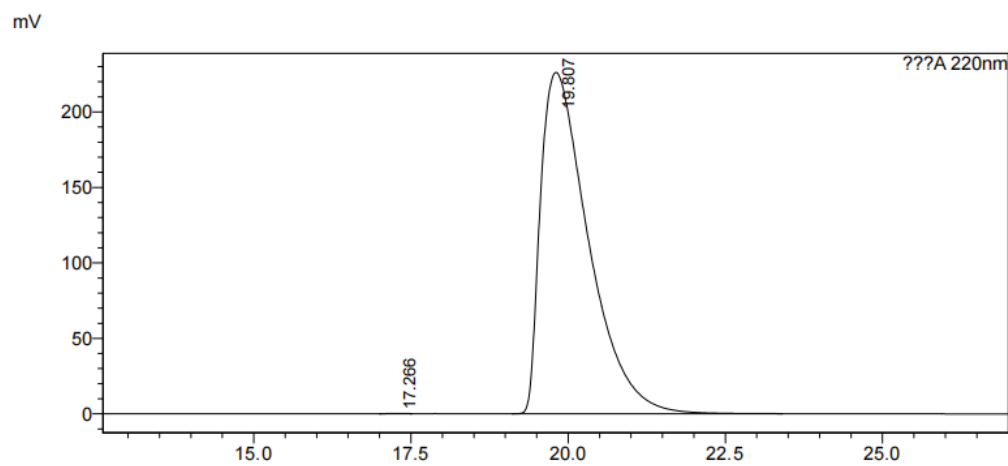

### <Peak Table>

??A 220nm

| Peak# | Ret. Time | Area     | Height | Conc.  | Unit | Mark | Name |
|-------|-----------|----------|--------|--------|------|------|------|
| 1     | 17.266    | 917      | 57     | 0.008  |      | M    |      |
| 2     | 19.807    | 11993814 | 226080 | 99.992 |      |      |      |
| Total |           | 11994731 | 226137 |        |      |      |      |

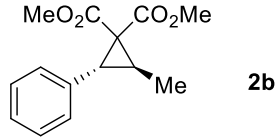

**<Chromatogram>**

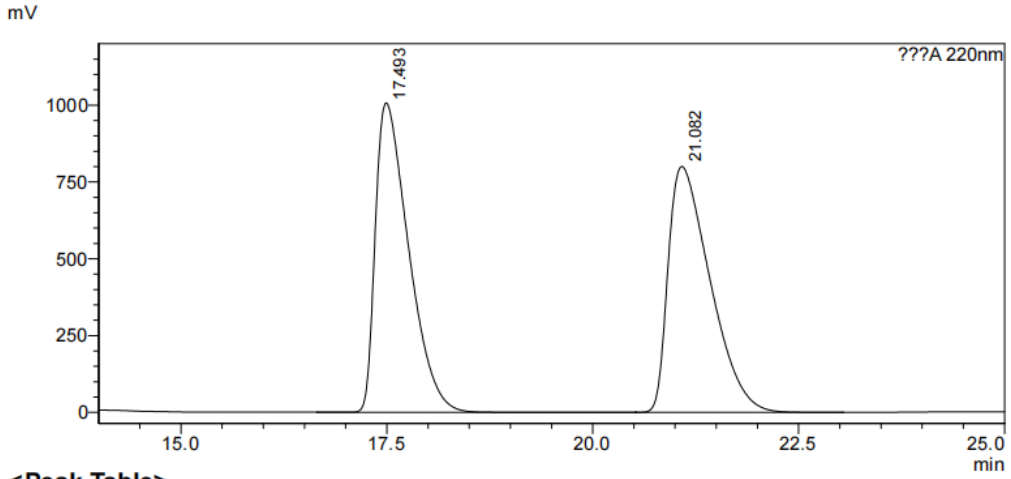

**<Peak Table>**

| ??A 220nm |           |          |         |        |      |      |      |
|-----------|-----------|----------|---------|--------|------|------|------|
| Peak#     | Ret. Time | Area     | Height  | Conc.  | Unit | Mark | Name |
| 1         | 17.493    | 28376984 | 1007545 | 50.024 |      |      |      |
| 2         | 21.082    | 28349659 | 800387  | 49.976 |      | V    |      |
| Total     |           | 56726643 | 1807932 |        |      |      |      |

**<Chromatogram>**

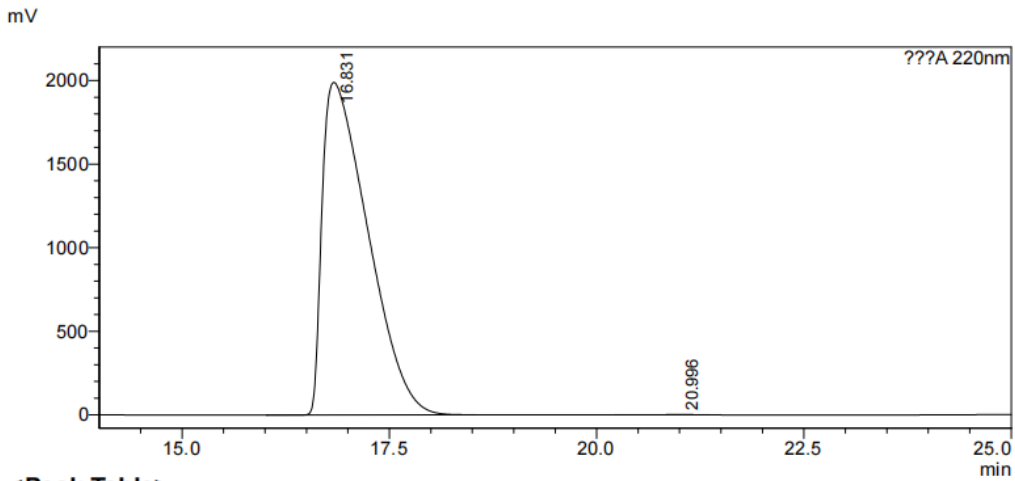

**<Peak Table>**

| ??A 220nm |           |          |         |        |      |      |      |
|-----------|-----------|----------|---------|--------|------|------|------|
| Peak#     | Ret. Time | Area     | Height  | Conc.  | Unit | Mark | Name |
| 1         | 16.831    | 76294045 | 1989892 | 99.943 |      | M    |      |
| 2         | 20.996    | 43173    | 1920    | 0.057  |      | M    |      |
| Total     |           | 76337218 | 1991812 |        |      |      |      |

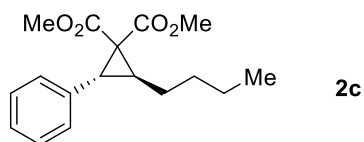

**<Chromatogram>**

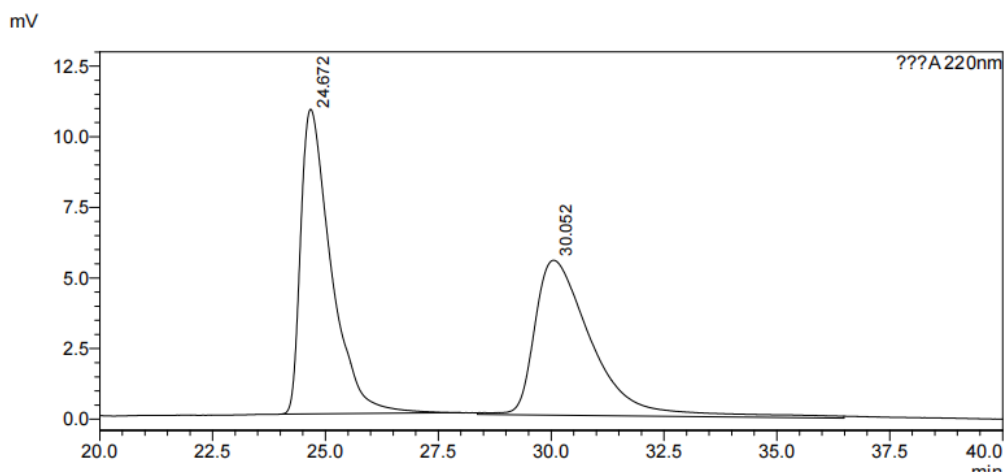

**<Peak Table>**

??A 220nm

| Peak# | Ret. Time | Area   | Height | Conc.  | Unit | Mark | Name |
|-------|-----------|--------|--------|--------|------|------|------|
| 1     | 24.672    | 507565 | 10788  | 51.111 |      | M    |      |
| 2     | 30.052    | 485505 | 5482   | 48.889 |      | M    |      |
| Total |           | 993069 | 16270  |        |      |      |      |

**<Chromatogram>**

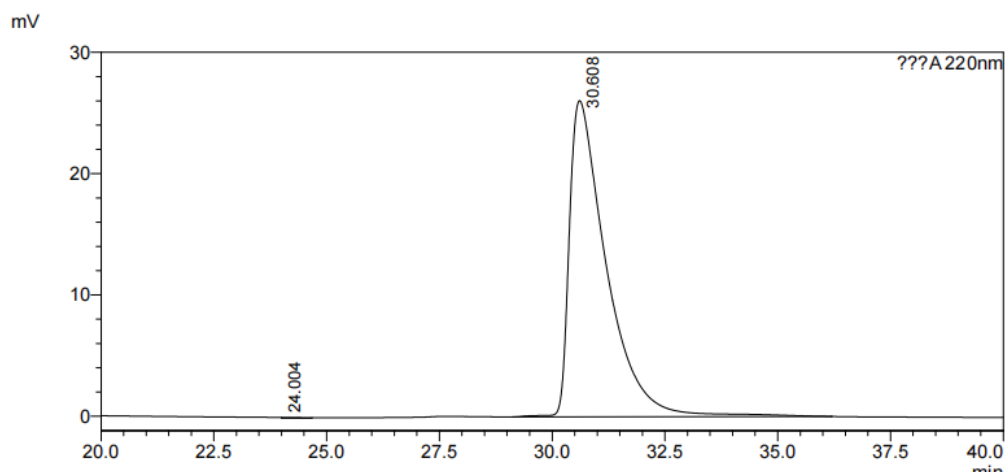

**<Peak Table>**

??A 220nm

| Peak# | Ret. Time | Area    | Height | Conc.  | Unit | Mark | Name |
|-------|-----------|---------|--------|--------|------|------|------|
| 1     | 24.004    | 2125    | 61     | 0.142  |      | M    |      |
| 2     | 30.608    | 1490945 | 26063  | 99.858 |      | M    |      |
| Total |           | 1493071 | 26124  |        |      |      |      |

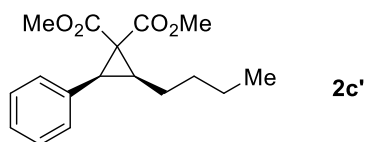

**<Chromatogram>**

mV

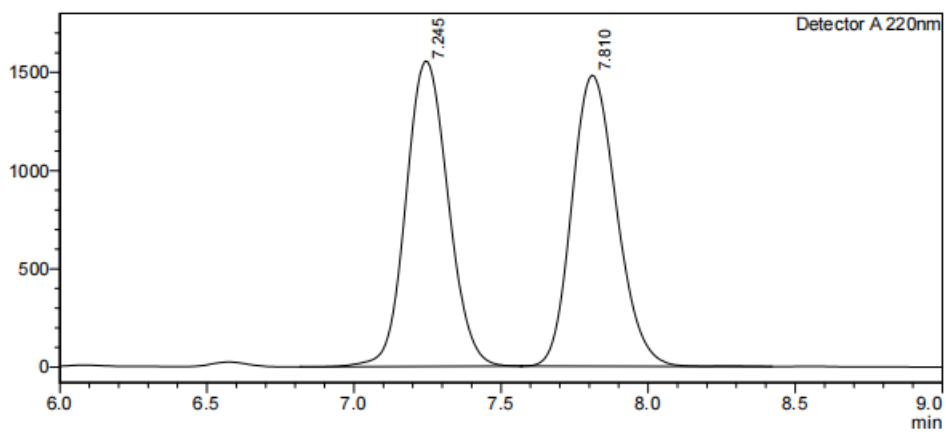

**<Peak Table>**

Detector A 220nm

| Peak# | Ret. Time | Area     | Height  | Conc.  | Unit | Mark | Name |
|-------|-----------|----------|---------|--------|------|------|------|
| 1     | 7.245     | 15543142 | 1553691 | 49.805 |      |      |      |
| 2     | 7.810     | 15664749 | 1480711 | 50.195 |      | M    |      |
| Total |           | 31207891 | 3034402 |        |      |      |      |

**<Chromatogram>**

mV

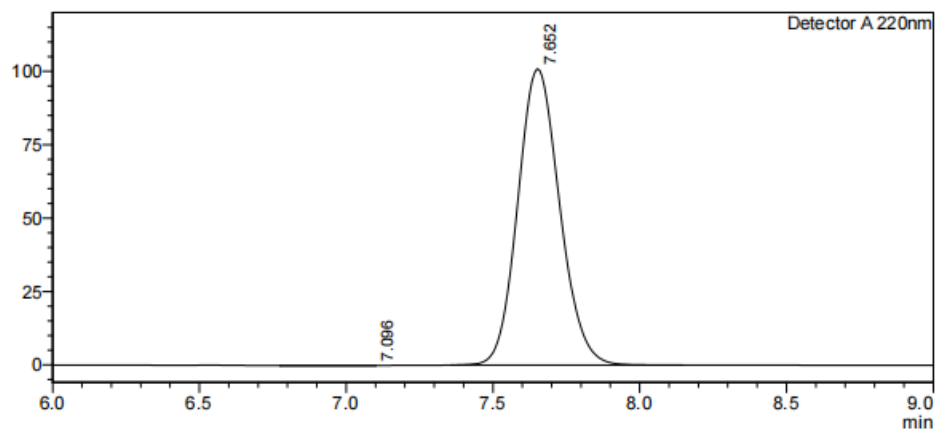

**<Peak Table>**

Detector A 220nm

| Peak# | Ret. Time | Area    | Height | Conc.  | Unit | Mark | Name |
|-------|-----------|---------|--------|--------|------|------|------|
| 1     | 7.096     | 1981    | 115    | 0.197  |      | M    |      |
| 2     | 7.652     | 1002797 | 100923 | 99.803 |      | M    |      |
| Total |           | 1004778 | 101039 |        |      |      |      |

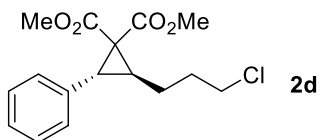

<Chromatogram>

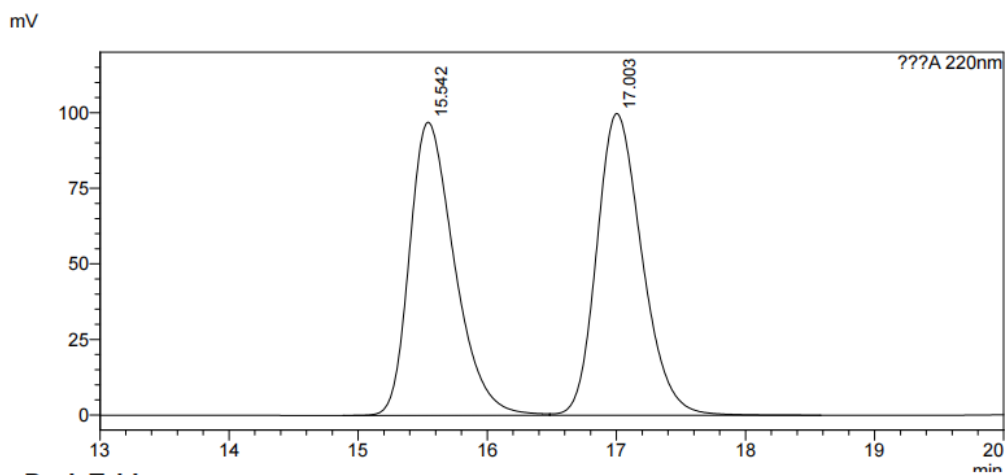

<Peak Table>

??A 220nm

| Peak# | Ret. Time | Area    | Height | Conc.  | Unit | Mark | Name |
|-------|-----------|---------|--------|--------|------|------|------|
| 1     | 15.542    | 2345637 | 96987  | 49.084 |      |      |      |
| 2     | 17.003    | 2433209 | 99828  | 50.916 |      | V    |      |
| Total |           | 4778846 | 196815 |        |      |      |      |

<Chromatogram>

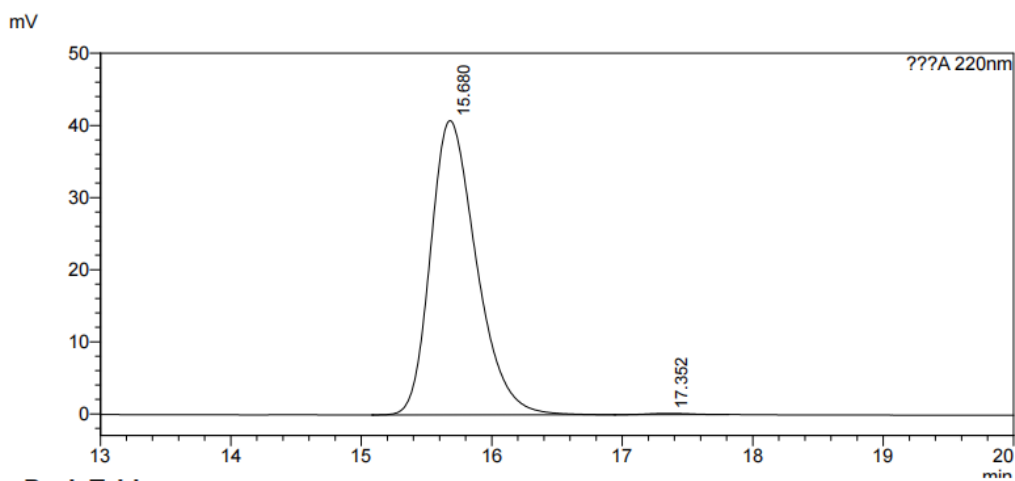

<Peak Table>

??A 220nm

| Peak# | Ret. Time | Area    | Height | Conc.  | Unit | Mark | Name |
|-------|-----------|---------|--------|--------|------|------|------|
| 1     | 15.680    | 997425  | 40800  | 99.592 |      |      |      |
| 2     | 17.352    | 4082    | 182    | 0.408  |      |      |      |
| Total |           | 1001507 | 40983  |        |      |      |      |

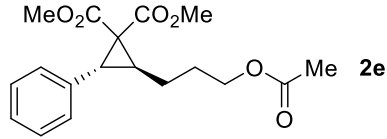

<Chromatogram>

mV

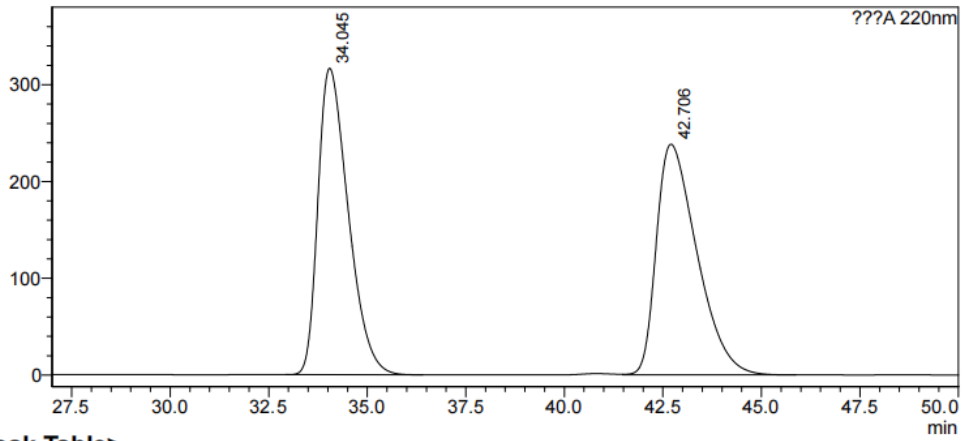

<Peak Table>

??A 220nm

| Peak# | Ret. Time | Area     | Height | Conc.  | Unit | Mark | Name |
|-------|-----------|----------|--------|--------|------|------|------|
| 1     | 34.045    | 16940677 | 316574 | 49.842 |      |      |      |
| 2     | 42.706    | 17048102 | 238295 | 50.158 |      |      |      |
| Total |           | 33988779 | 554869 |        |      |      |      |

<Chromatogram>

mV

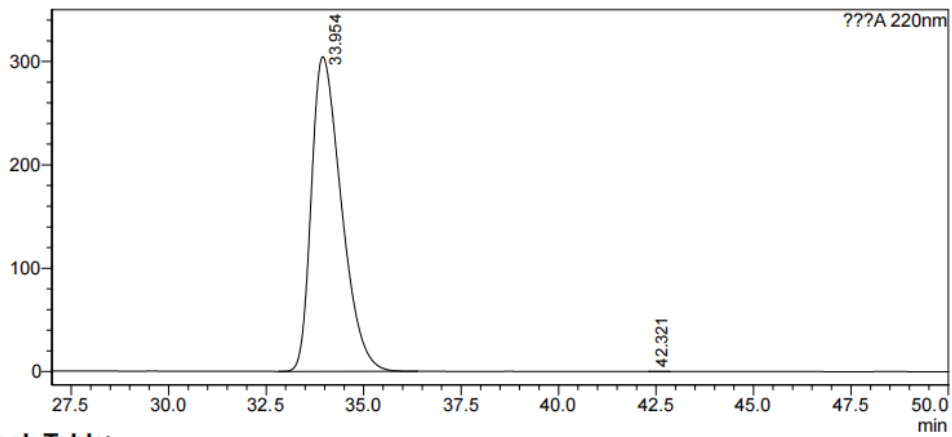

<Peak Table>

??A 220nm

| Peak# | Ret. Time | Area     | Height | Conc.  | Unit | Mark | Name |
|-------|-----------|----------|--------|--------|------|------|------|
| 1     | 33.954    | 16295189 | 304462 | 99.977 |      |      |      |
| 2     | 42.321    | 3747     | 127    | 0.023  |      | M    |      |
| Total |           | 16298936 | 304590 |        |      |      |      |

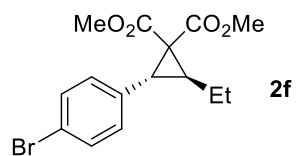

<Chromatogram>

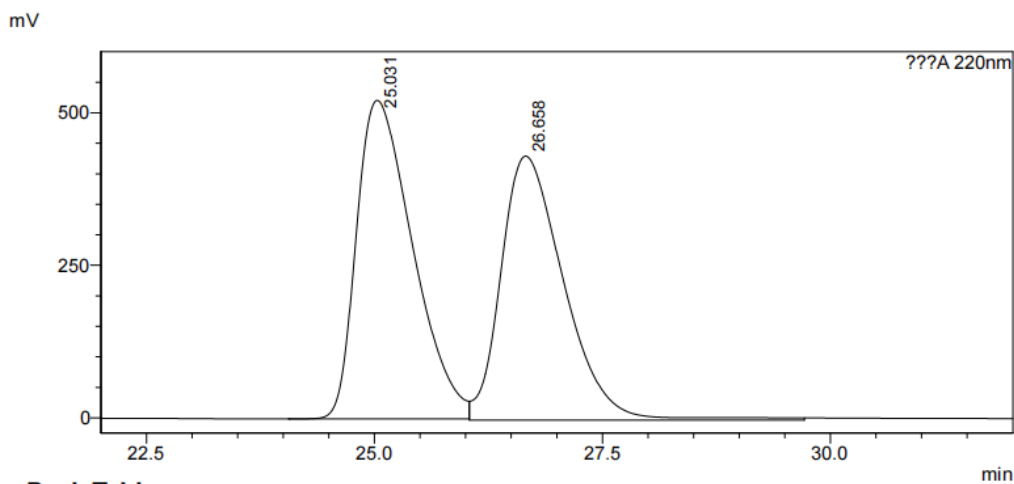

<Peak Table>

??A 220nm

| Peak# | Ret. Time | Area     | Height | Conc.  | Unit | Mark | Name |
|-------|-----------|----------|--------|--------|------|------|------|
| 1     | 25.031    | 22396323 | 522082 | 51.832 |      |      |      |
| 2     | 26.658    | 20812732 | 432570 | 48.168 |      | M    |      |
| Total |           | 43209055 | 954653 |        |      |      |      |

<Chromatogram>

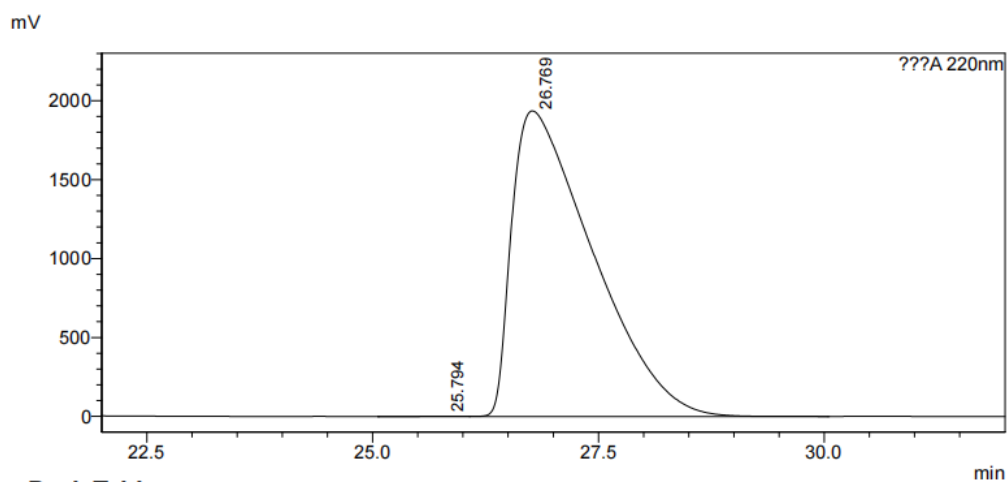

<Peak Table>

??A 220nm

| Peak# | Ret. Time | Area      | Height  | Conc.  | Unit | Mark | Name |
|-------|-----------|-----------|---------|--------|------|------|------|
| 1     | 25.794    | 60490     | 1689    | 0.050  |      |      |      |
| 2     | 26.769    | 120707783 | 1936524 | 99.950 |      | V    |      |
| Total |           | 120768273 | 1938212 |        |      |      |      |

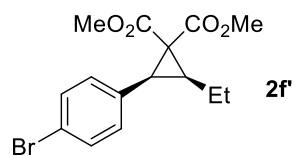

**<Chromatogram>**

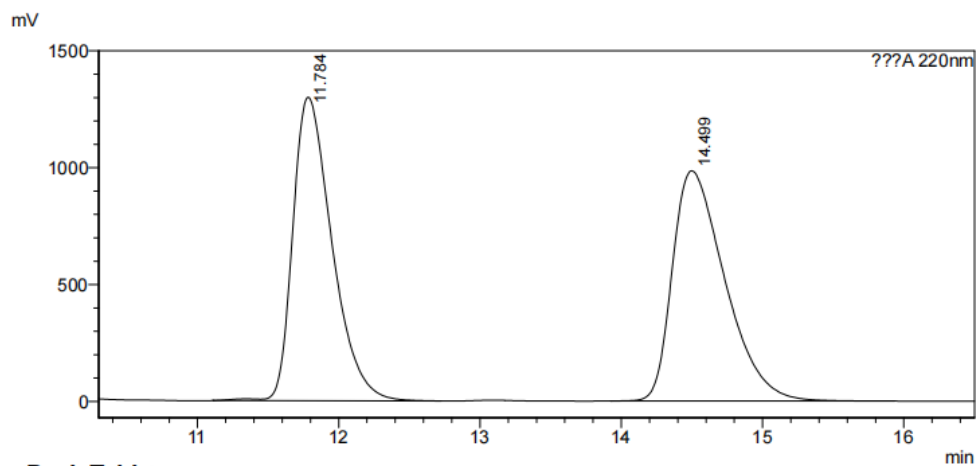

**<Peak Table>**

??A 220nm

| Peak# | Ret. Time | Area     | Height  | Conc.  | Unit | Mark | Name |
|-------|-----------|----------|---------|--------|------|------|------|
| 1     | 11.784    | 25050555 | 1298806 | 49.589 |      | M    |      |
| 2     | 14.499    | 25466282 | 984959  | 50.411 |      | M    |      |
| Total |           | 50516838 | 2283765 |        |      |      |      |

**<Chromatogram>**

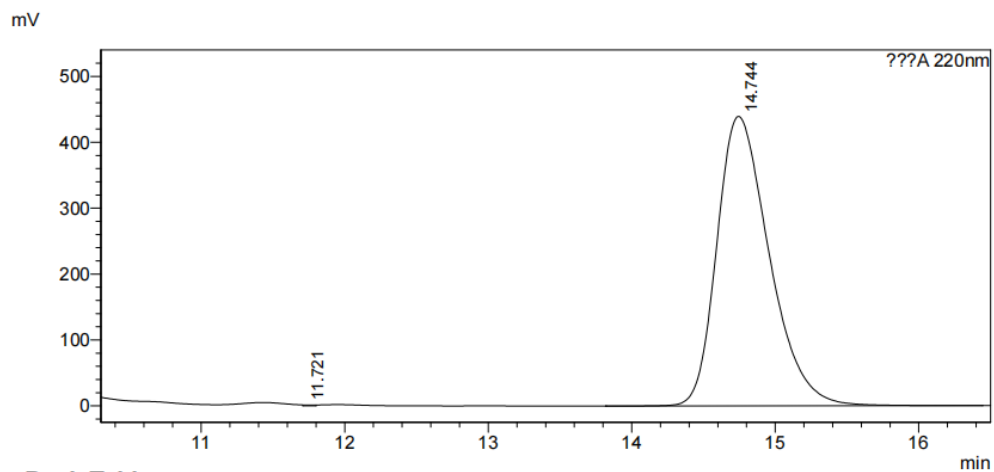

**<Peak Table>**

??A 220nm

| Peak# | Ret. Time | Area     | Height | Conc.  | Unit | Mark | Name |
|-------|-----------|----------|--------|--------|------|------|------|
| 1     | 11.721    | 7096     | 1384   | 0.064  |      | M    |      |
| 2     | 14.744    | 11156611 | 439399 | 99.936 |      |      |      |
| Total |           | 11163706 | 440783 |        |      |      |      |

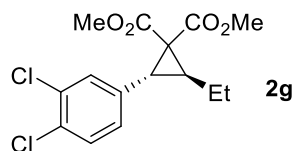

**<Chromatogram>**

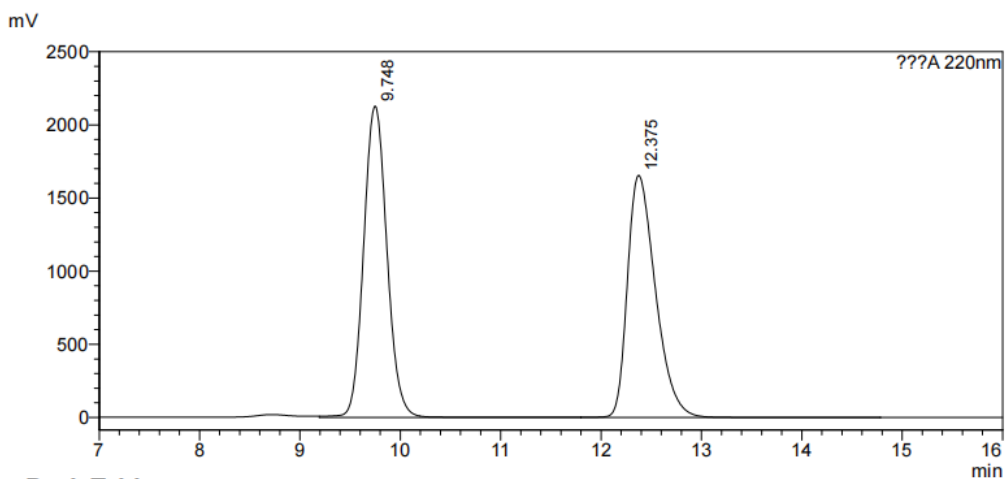

**<Peak Table>**

??A 220nm

| Peak# | Ret. Time | Area     | Height  | Conc.  | Unit | Mark | Name |
|-------|-----------|----------|---------|--------|------|------|------|
| 1     | 9.748     | 34470480 | 2128285 | 51.781 |      |      |      |
| 2     | 12.375    | 32099691 | 1655375 | 48.219 |      | SV   |      |
| Total |           | 66570170 | 3783659 |        |      |      |      |

**<Chromatogram>**

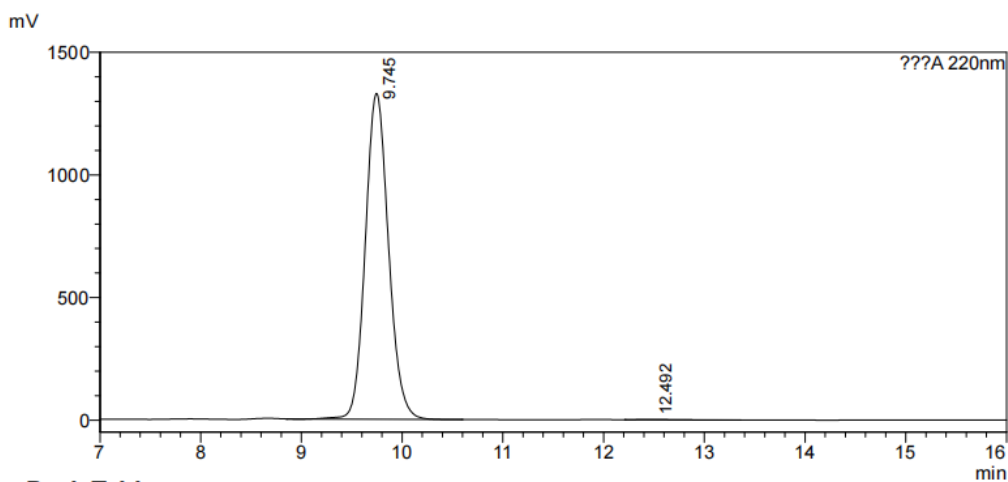

**<Peak Table>**

??A 220nm

| Peak# | Ret. Time | Area     | Height  | Conc.  | Unit | Mark | Name |
|-------|-----------|----------|---------|--------|------|------|------|
| 1     | 9.745     | 21302914 | 1329104 | 99.784 |      | M    |      |
| 2     | 12.492    | 46159    | 1725    | 0.216  |      |      |      |
| Total |           | 21349073 | 1330829 |        |      |      |      |

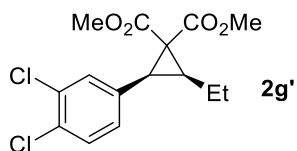

<Chromatogram>

mV

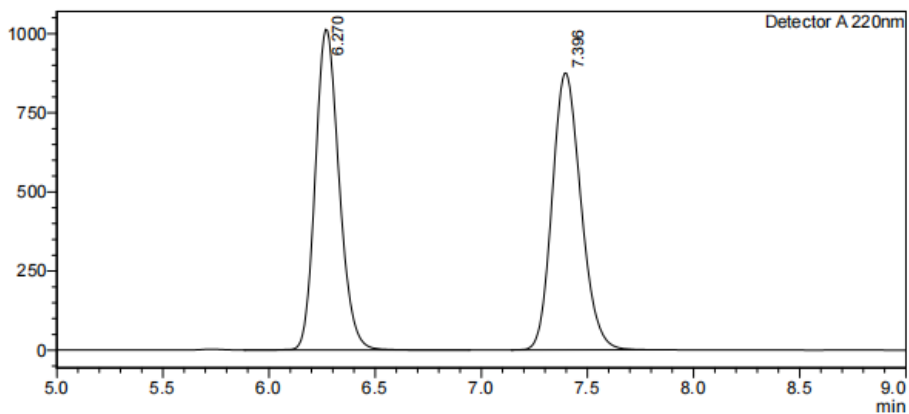

<Peak Table>

Detector A 220nm

| Peak# | Ret. Time | Area     | Height  | Conc.  | Unit | Mark | Name |
|-------|-----------|----------|---------|--------|------|------|------|
| 1     | 6.270     | 7896214  | 1013205 | 48.982 |      | M    |      |
| 2     | 7.396     | 8224306  | 874489  | 51.018 |      | M    |      |
| Total |           | 16120520 | 1887694 |        |      |      |      |

<Chromatogram>

mV

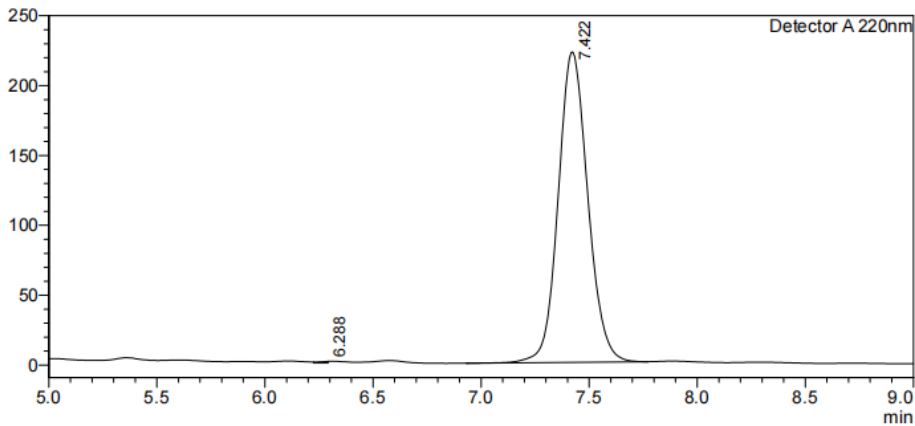

<Peak Table>

Detector A 220nm

| Peak# | Ret. Time | Area    | Height | Conc.  | Unit | Mark | Name |
|-------|-----------|---------|--------|--------|------|------|------|
| 1     | 6.288     | 3463    | 1039   | 0.163  |      | M    |      |
| 2     | 7.422     | 2115896 | 222219 | 99.837 |      |      |      |
| Total |           | 2119360 | 223258 |        |      |      |      |

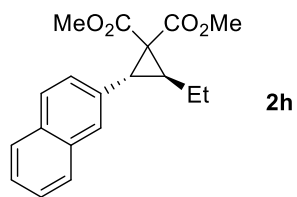

**<Chromatogram>**

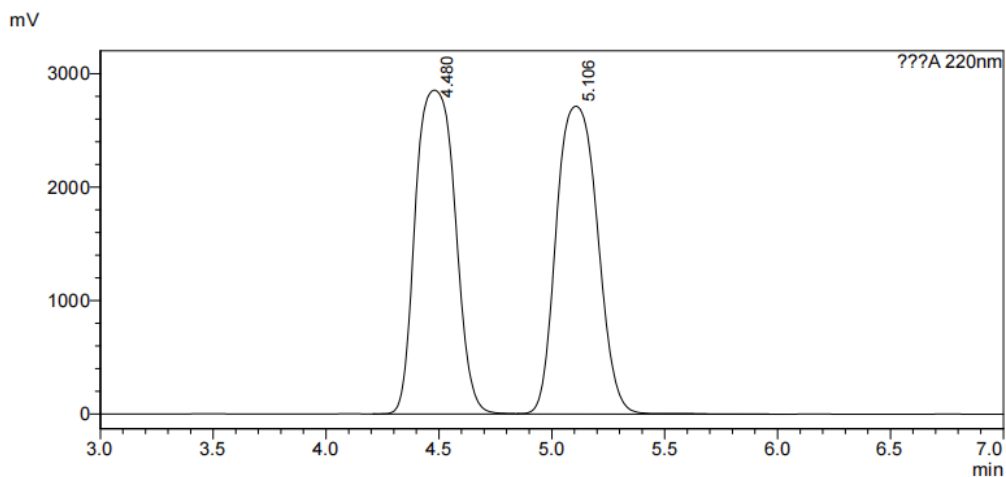

**<Peak Table>**

??A 220nm

| Peak# | Ret. Time | Area     | Height  | Conc.  | Unit | Mark | Name |
|-------|-----------|----------|---------|--------|------|------|------|
| 1     | 4.480     | 34909538 | 2853711 | 50.278 |      |      |      |
| 2     | 5.106     | 34523174 | 2712825 | 49.722 |      | V    |      |
| Total |           | 69432712 | 5566535 |        |      |      |      |

**<Chromatogram>**

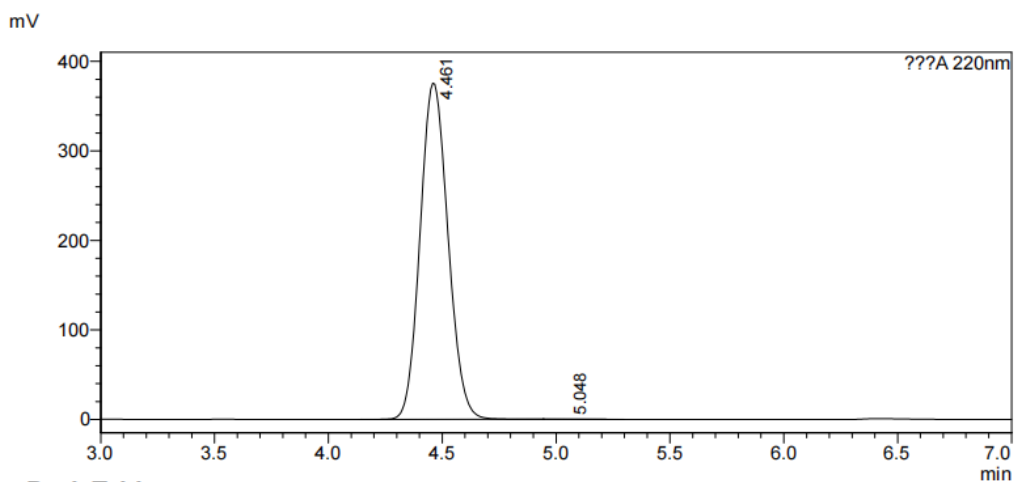

**<Peak Table>**

??A 220nm

| Peak# | Ret. Time | Area    | Height | Conc.  | Unit | Mark | Name |
|-------|-----------|---------|--------|--------|------|------|------|
| 1     | 4.461     | 3203304 | 375539 | 99.965 |      | M    |      |
| 2     | 5.048     | 1114    | 99     | 0.035  |      | M    |      |
| Total |           | 3204418 | 375638 |        |      |      |      |

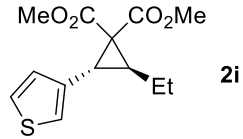

<Chromatogram>

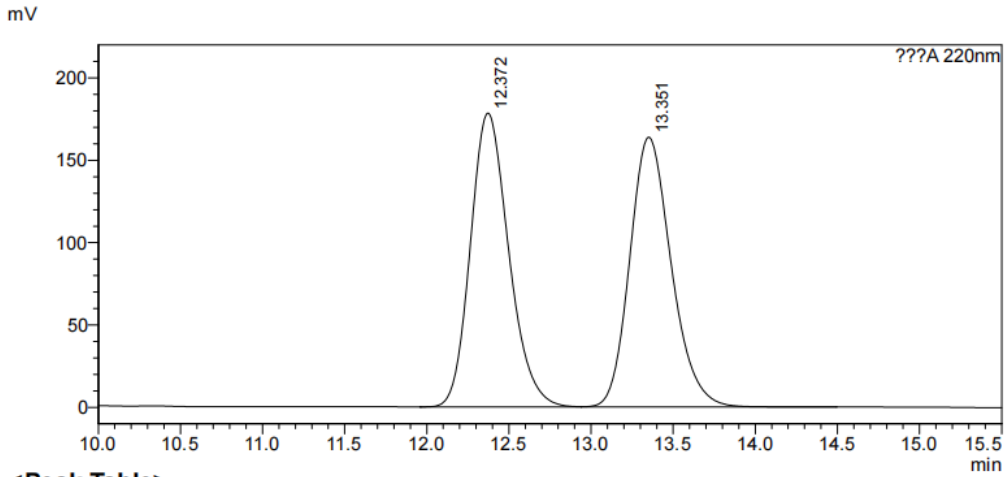

<Peak Table>

??A 220nm

| Peak# | Ret. Time | Area    | Height | Conc.  | Unit | Mark | Name |
|-------|-----------|---------|--------|--------|------|------|------|
| 1     | 12.372    | 2899757 | 178405 | 50.178 |      |      |      |
| 2     | 13.351    | 2879140 | 163851 | 49.822 |      | V    |      |
| Total |           | 5778897 | 342257 |        |      |      |      |

<Chromatogram>

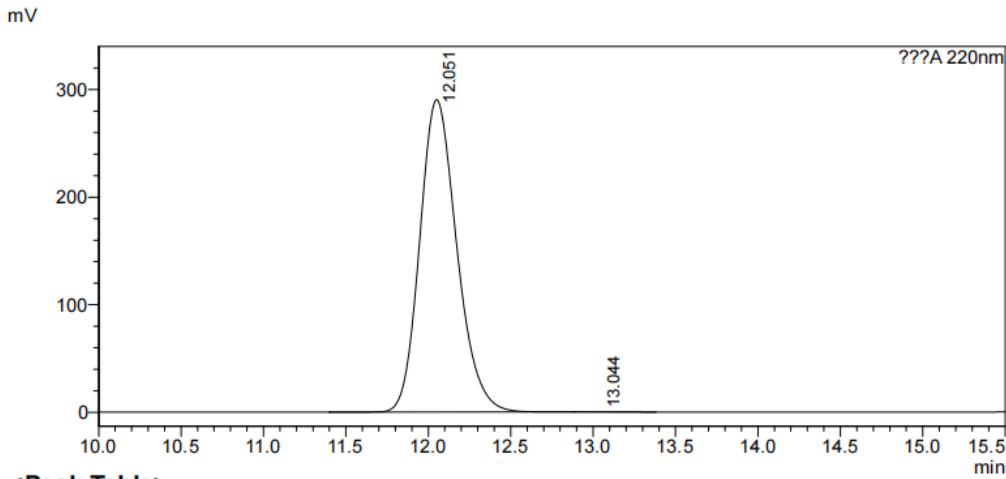

<Peak Table>

??A 220nm

| Peak# | Ret. Time | Area    | Height | Conc.  | Unit | Mark | Name |
|-------|-----------|---------|--------|--------|------|------|------|
| 1     | 12.051    | 4551207 | 290534 | 99.976 |      |      |      |
| 2     | 13.044    | 1074    | 55     | 0.024  |      | M    |      |
| Total |           | 4552281 | 290590 |        |      |      |      |

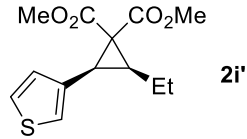

<Chromatogram>

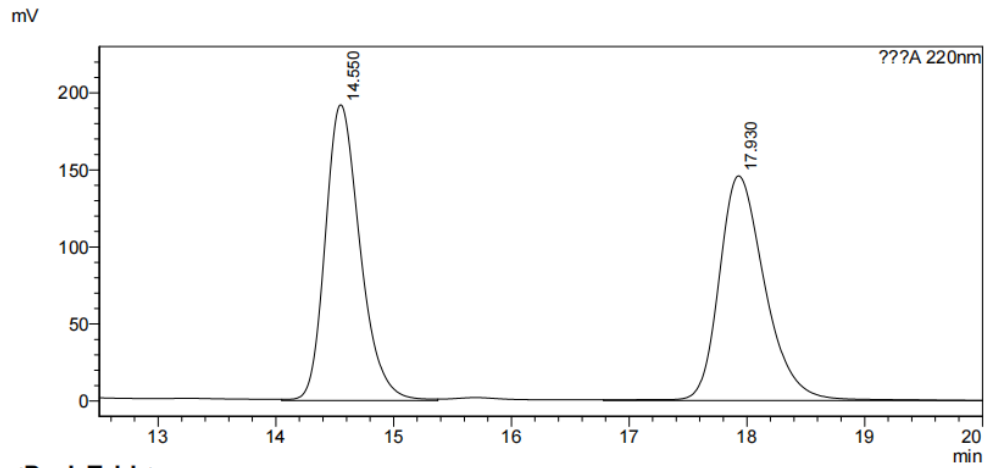

<Peak Table>

??A 220nm

| Peak# | Ret. Time | Area    | Height | Conc.  | Unit | Mark | Name |
|-------|-----------|---------|--------|--------|------|------|------|
| 1     | 14.550    | 3947060 | 191964 | 50.022 |      |      |      |
| 2     | 17.930    | 3943557 | 145729 | 49.978 |      |      |      |
| Total |           | 7890617 | 337694 |        |      |      |      |

<Chromatogram>

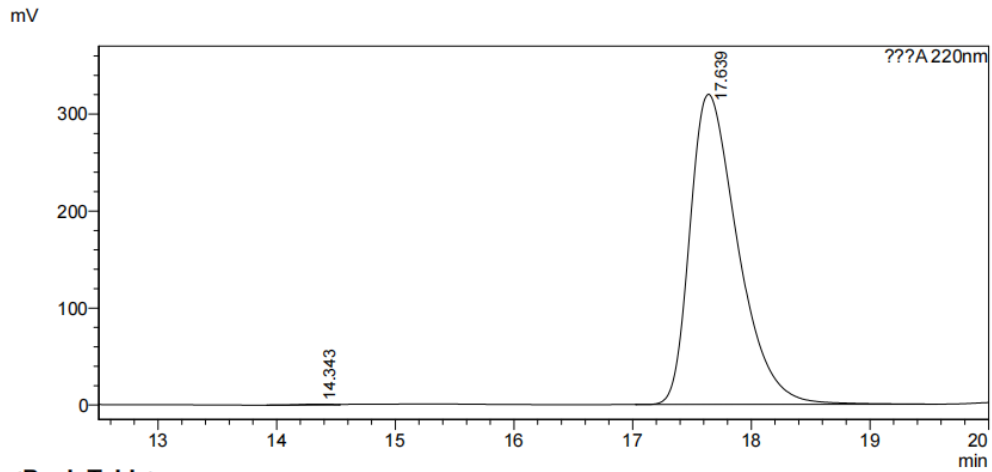

<Peak Table>

??A 220nm

| Peak# | Ret. Time | Area    | Height | Conc.  | Unit | Mark | Name |
|-------|-----------|---------|--------|--------|------|------|------|
| 1     | 14.343    | 17473   | 876    | 0.195  |      |      |      |
| 2     | 17.639    | 8951844 | 319861 | 99.805 |      | M    |      |
| Total |           | 8969317 | 320737 |        |      |      |      |

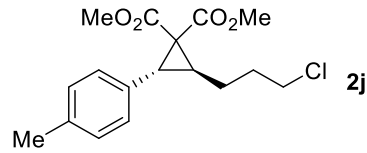

<Chromatogram>

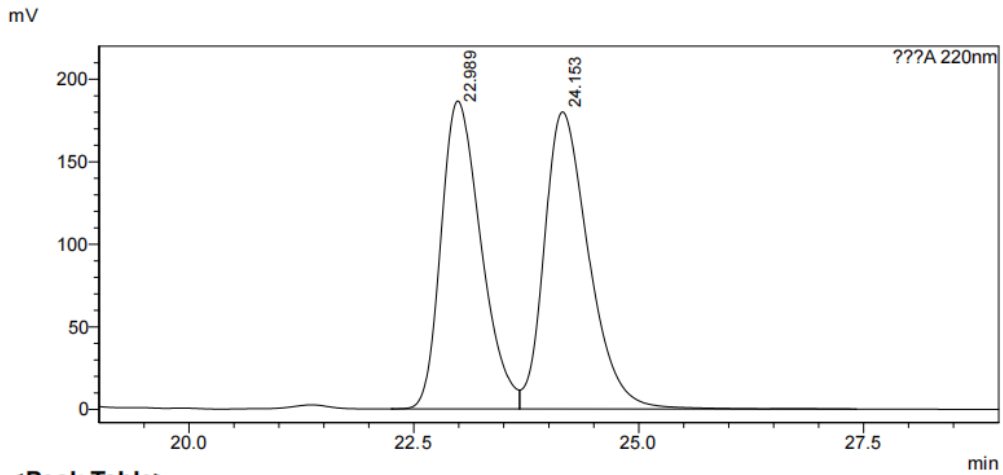

<Peak Table>

| Peak# | Ret. Time | Area     | Height | Conc.  | Unit | Mark | Name |
|-------|-----------|----------|--------|--------|------|------|------|
| 1     | 22.989    | 5764901  | 186508 | 48.252 |      |      |      |
| 2     | 24.153    | 6182622  | 179942 | 51.748 |      | V    |      |
| Total |           | 11947523 | 366450 |        |      |      |      |

<Chromatogram>

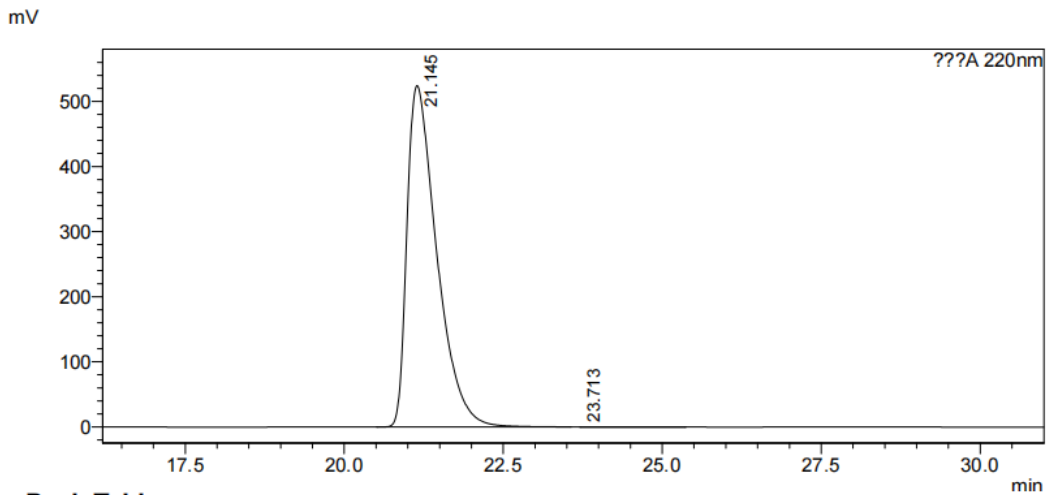

<Peak Table>

| Peak# | Ret. Time | Area     | Height | Conc.  | Unit | Mark | Name |
|-------|-----------|----------|--------|--------|------|------|------|
| 1     | 21.145    | 17131125 | 524318 | 99.864 |      | M    |      |
| 2     | 23.713    | 23352    | 291    | 0.136  |      | M    |      |
| Total |           | 17154476 | 524609 |        |      |      |      |

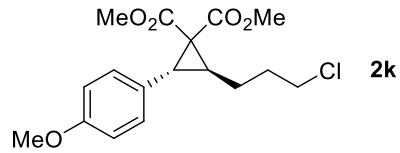

<Chromatogram>

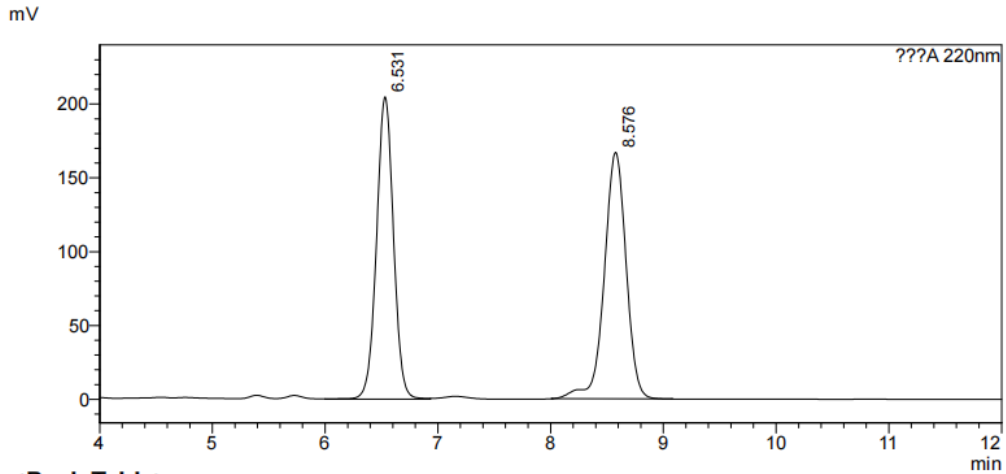

<Peak Table>

??A 220nm

| Peak# | Ret. Time | Area    | Height | Conc.  | Unit | Mark | Name |
|-------|-----------|---------|--------|--------|------|------|------|
| 1     | 6.531     | 2143047 | 204858 | 48.683 |      |      |      |
| 2     | 8.576     | 2258987 | 167045 | 51.317 |      | M    |      |
| Total |           | 4402034 | 371903 |        |      |      |      |

<Chromatogram>

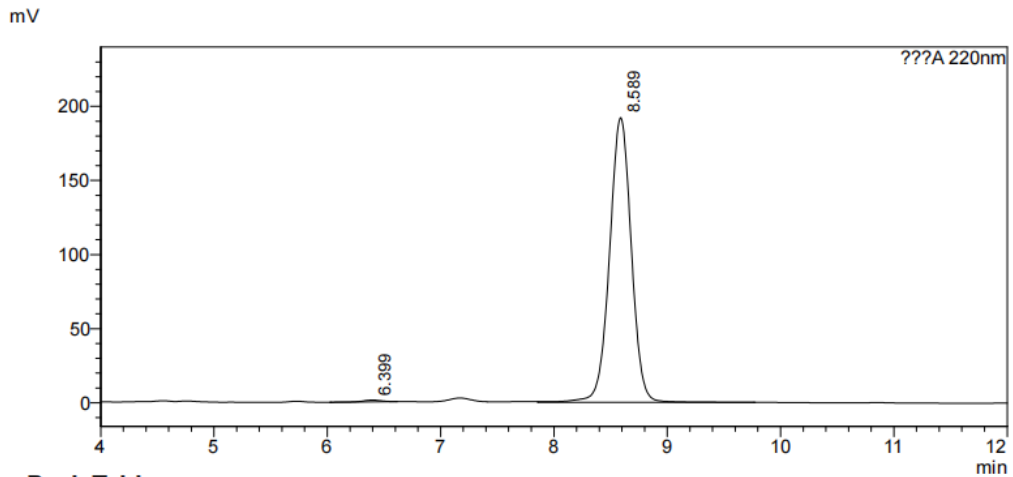

<Peak Table>

??A 220nm

| Peak# | Ret. Time | Area    | Height | Conc.  | Unit | Mark | Name |
|-------|-----------|---------|--------|--------|------|------|------|
| 1     | 6.399     | 13326   | 1213   | 0.514  |      | M    |      |
| 2     | 8.589     | 2577030 | 192164 | 99.486 |      |      |      |
| Total |           | 2590356 | 193376 |        |      |      |      |

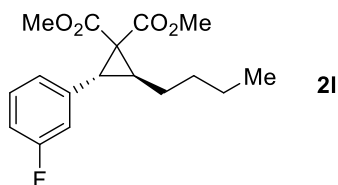

**<Chromatogram>**

mV

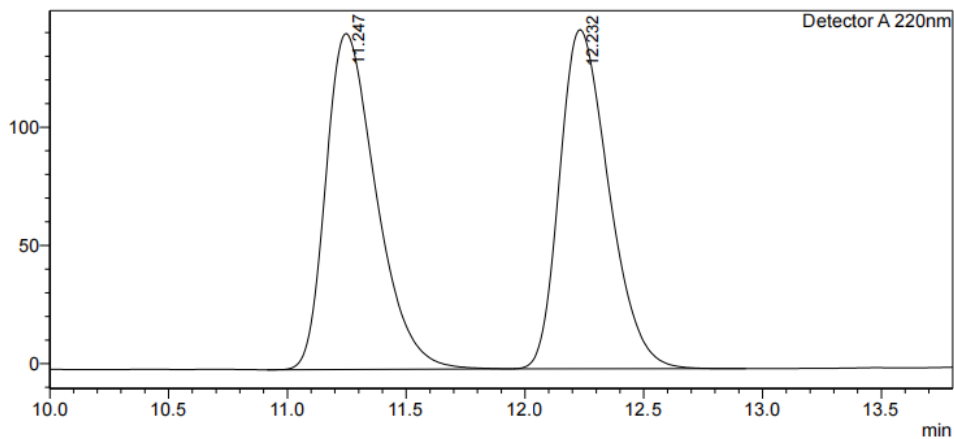

**<Peak Table>**

Detector A 220nm

| Peak# | Ret. Time | Area    | Height | Conc.  | Unit | Mark | Name |
|-------|-----------|---------|--------|--------|------|------|------|
| 1     | 11.247    | 2096388 | 141957 | 50.381 |      | M    |      |
| 2     | 12.232    | 2064669 | 143366 | 49.619 |      | M    |      |
| Total |           | 4161058 | 285322 |        |      |      |      |

**<Chromatogram>**

mV

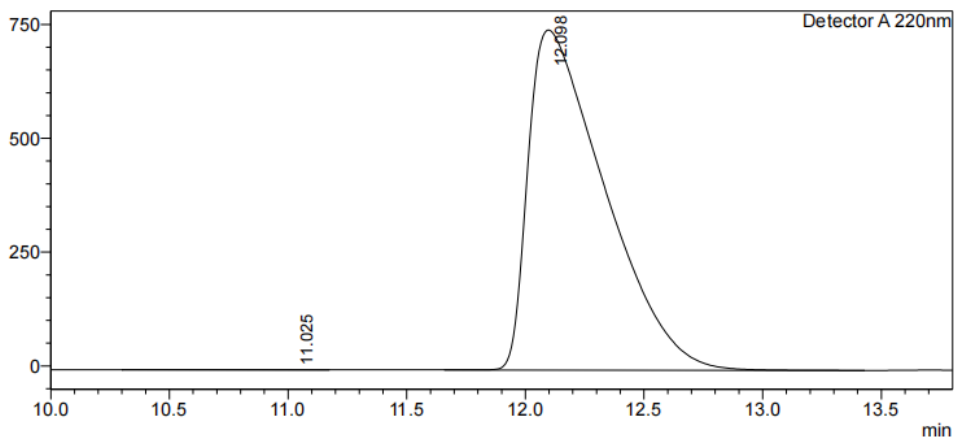

**<Peak Table>**

Detector A 220nm

| Peak# | Ret. Time | Area     | Height | Conc.  | Unit | Mark | Name |
|-------|-----------|----------|--------|--------|------|------|------|
| 1     | 11.025    | 16836    | 566    | 0.100  |      |      |      |
| 2     | 12.098    | 16789126 | 747003 | 99.900 |      |      |      |
| Total |           | 16805962 | 747570 |        |      |      |      |

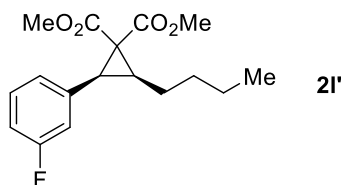

**<Chromatogram>**

mV

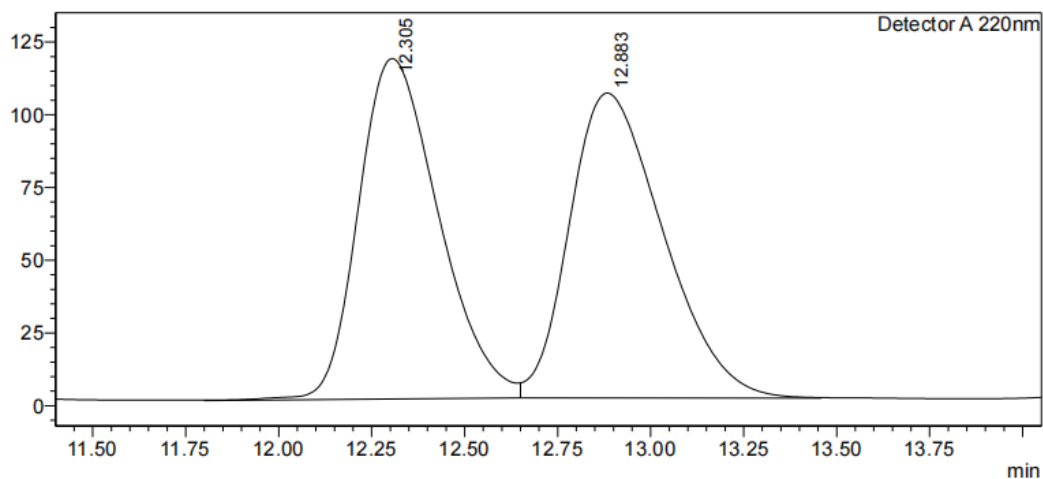

**<Peak Table>**

Detector A 220nm

| Peak# | Ret. Time | Area    | Height | Conc.  | Unit | Mark | Name |
|-------|-----------|---------|--------|--------|------|------|------|
| 1     | 12.305    | 1755211 | 117003 | 48.941 |      | M    |      |
| 2     | 12.883    | 1831151 | 104765 | 51.059 |      | M    |      |
| Total |           | 3586362 | 221768 |        |      |      |      |

**<Chromatogram>**

mV

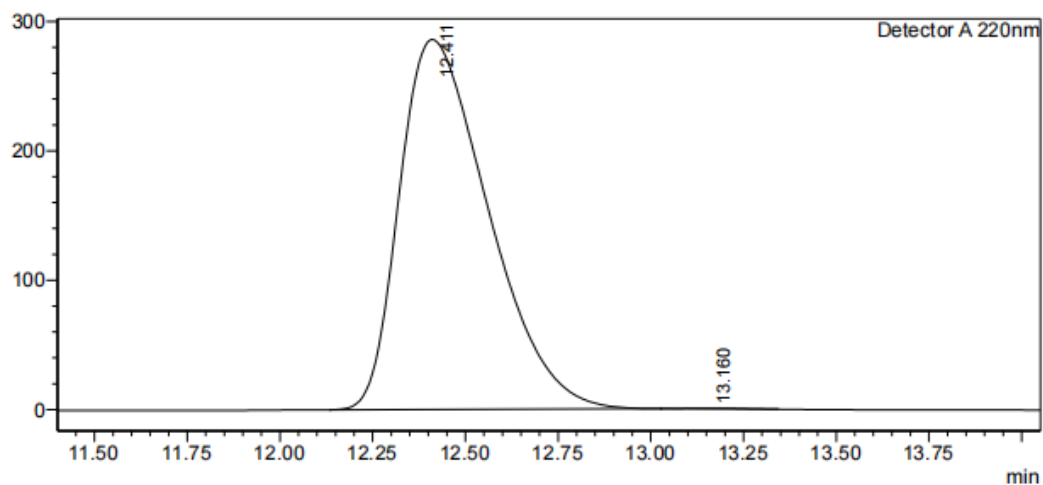

**<Peak Table>**

Detector A 220nm

| Peak# | Ret. Time | Area    | Height | Conc.  | Unit | Mark | Name |
|-------|-----------|---------|--------|--------|------|------|------|
| 1     | 12.411    | 4764754 | 285929 | 99.871 |      | M    |      |
| 2     | 13.160    | 6166    | 585    | 0.129  |      | M    |      |
| Total |           | 4770920 | 286513 |        |      |      |      |

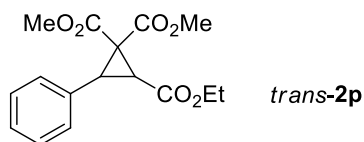

**<Chromatogram>**

mV

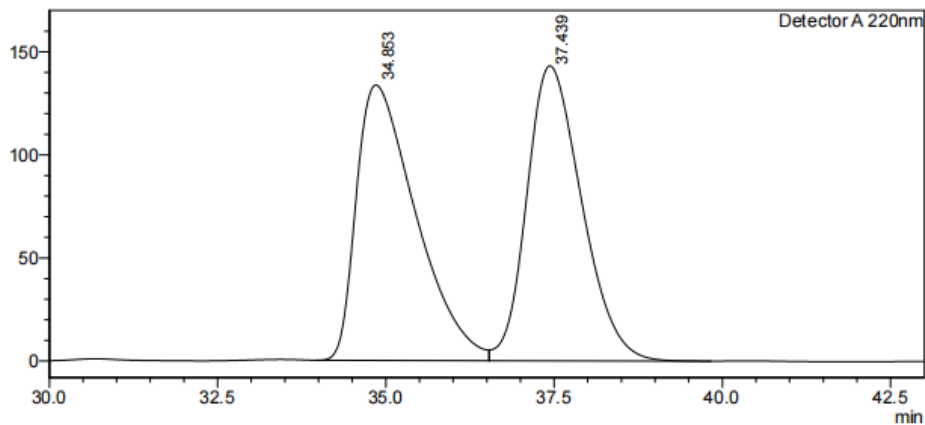

**<Peak Table>**

Detector A 220nm

| Peak# | Ret. Time | Area     | Height | Conc.  | Unit | Mark | Name |
|-------|-----------|----------|--------|--------|------|------|------|
| 1     | 34.853    | 8234867  | 133535 | 50.317 |      |      |      |
| 2     | 37.439    | 8131114  | 143017 | 49.683 |      | V    |      |
| Total |           | 16365981 | 276552 |        |      |      |      |

**<Chromatogram>**

mV

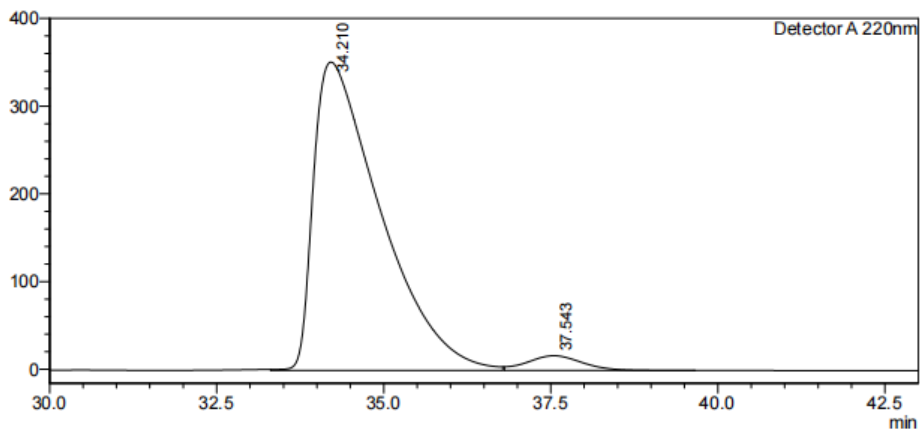

**<Peak Table>**

Detector A 220nm

| Peak# | Ret. Time | Area     | Height | Conc.  | Unit | Mark | Name |
|-------|-----------|----------|--------|--------|------|------|------|
| 1     | 34.210    | 24578761 | 351741 | 96.180 |      | M    |      |
| 2     | 37.543    | 976290   | 16899  | 3.820  |      | M    |      |
| Total |           | 25555050 | 368640 |        |      |      |      |

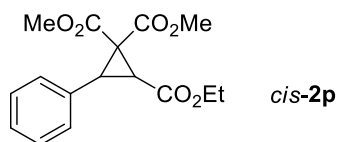

**<Chromatogram>**

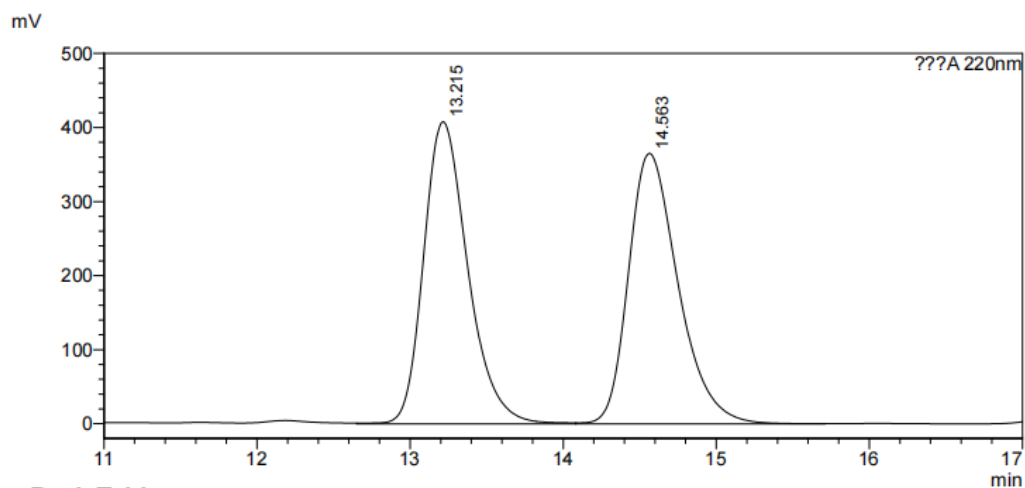

**<Peak Table>**

??A 220nm

| Peak# | Ret. Time | Area     | Height | Conc.  | Unit | Mark | Name |
|-------|-----------|----------|--------|--------|------|------|------|
| 1     | 13.215    | 8206054  | 408134 | 49.881 |      |      |      |
| 2     | 14.563    | 8245335  | 365295 | 50.119 |      | V    |      |
| Total |           | 16451389 | 773429 |        |      |      |      |

**<Chromatogram>**

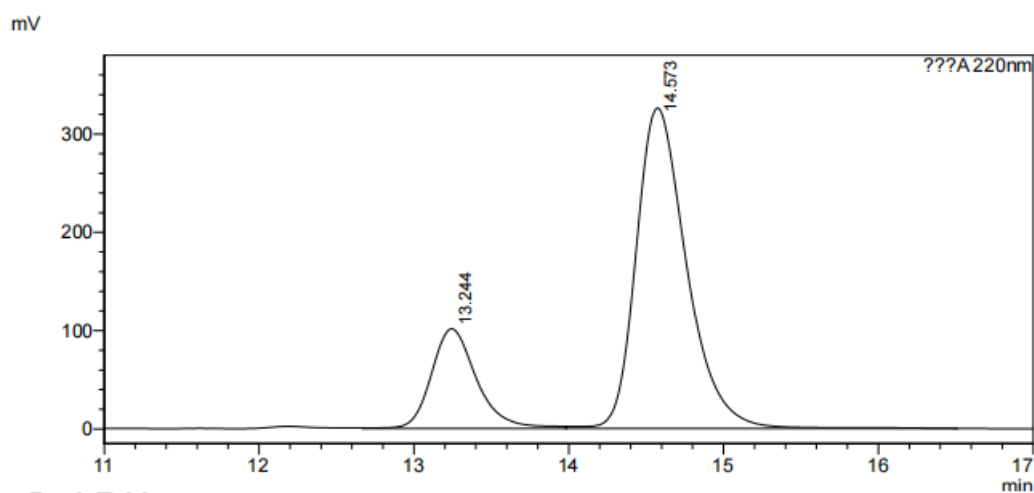

**<Peak Table>**

??A 220nm

| Peak# | Ret. Time | Area    | Height | Conc.  | Unit | Mark | Name |
|-------|-----------|---------|--------|--------|------|------|------|
| 1     | 13.244    | 2069237 | 101417 | 21.791 |      | M    |      |
| 2     | 14.573    | 7426548 | 326036 | 78.209 |      | M    |      |
| Total |           | 9495785 | 427454 |        |      |      |      |

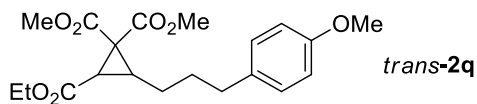

<Chromatogram>

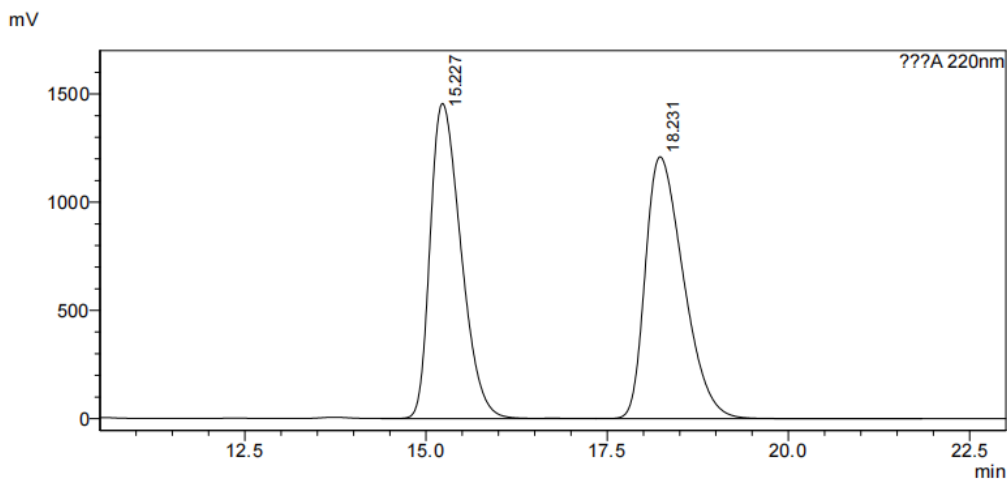

<Peak Table>

??A 220nm

| Peak# | Ret. Time | Area     | Height  | Conc.  | Unit | Mark | Name |
|-------|-----------|----------|---------|--------|------|------|------|
| 1     | 15.227    | 43092066 | 1456569 | 49.283 |      |      |      |
| 2     | 18.231    | 44346357 | 1209664 | 50.717 |      | V    |      |
| Total |           | 87438423 | 2666233 |        |      |      |      |

<Chromatogram>

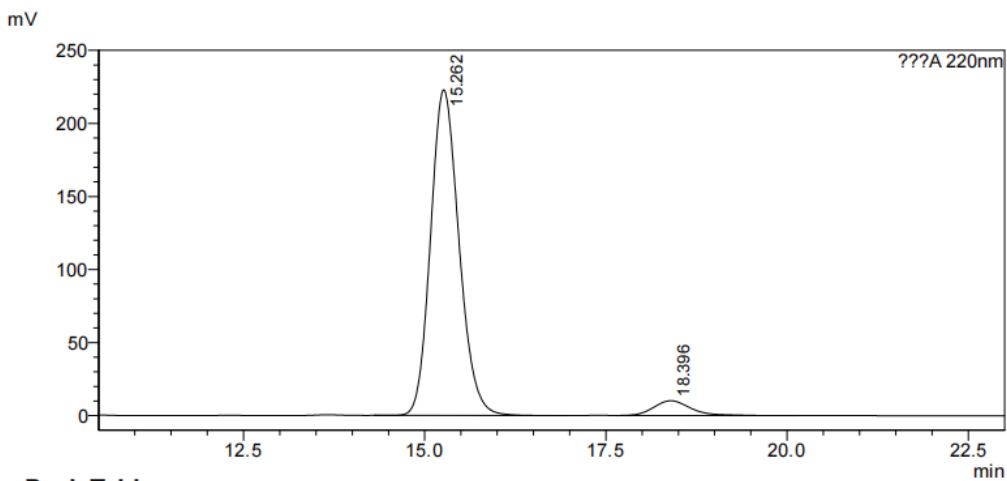

<Peak Table>

??A 220nm

| Peak# | Ret. Time | Area    | Height | Conc.  | Unit | Mark | Name |
|-------|-----------|---------|--------|--------|------|------|------|
| 1     | 15.262    | 6085314 | 222842 | 94.315 |      |      |      |
| 2     | 18.396    | 366775  | 10168  | 5.685  |      |      |      |
| Total |           | 6452089 | 233010 |        |      |      |      |

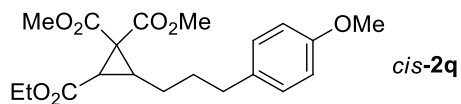

<Chromatogram>

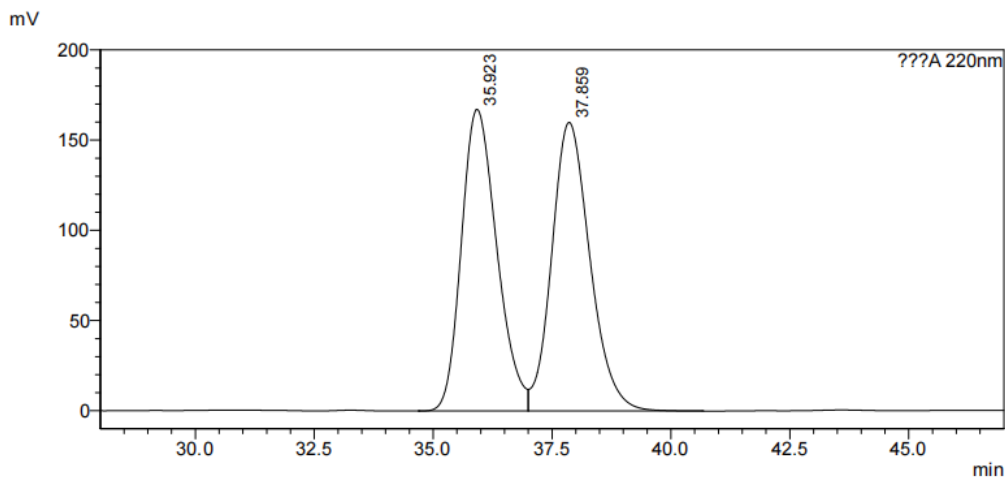

<Peak Table>

??A 220nm

| Peak# | Ret. Time | Area     | Height | Conc.  | Unit | Mark | Name |
|-------|-----------|----------|--------|--------|------|------|------|
| 1     | 35.923    | 8684981  | 167225 | 49.245 |      |      |      |
| 2     | 37.859    | 8951136  | 160019 | 50.755 |      | V    |      |
| Total |           | 17636117 | 327244 |        |      |      |      |

<Chromatogram>

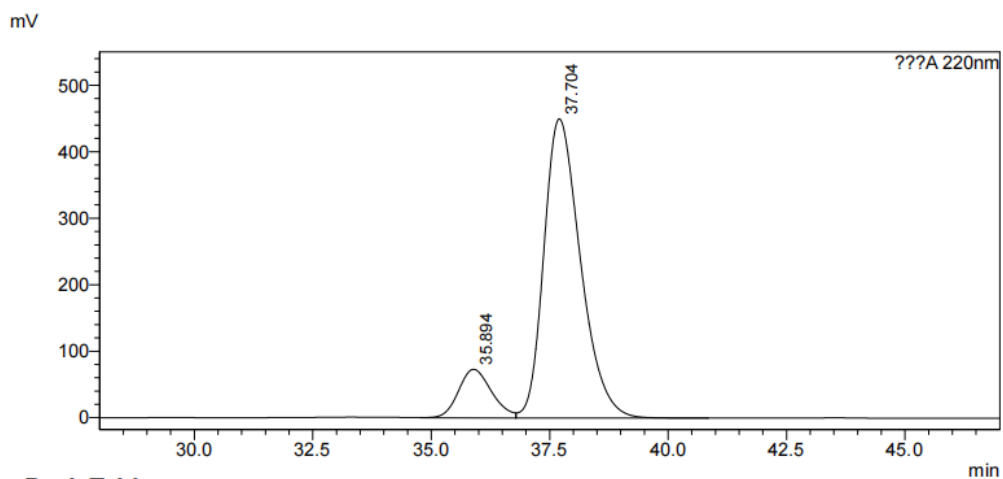

<Peak Table>

??A 220nm

| Peak# | Ret. Time | Area     | Height | Conc.  | Unit | Mark | Name |
|-------|-----------|----------|--------|--------|------|------|------|
| 1     | 35.894    | 3554002  | 73072  | 12.795 |      |      |      |
| 2     | 37.704    | 24221447 | 450039 | 87.205 |      | V    |      |
| Total |           | 27775449 | 523111 |        |      |      |      |

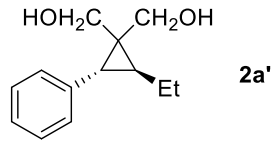

<Chromatogram>

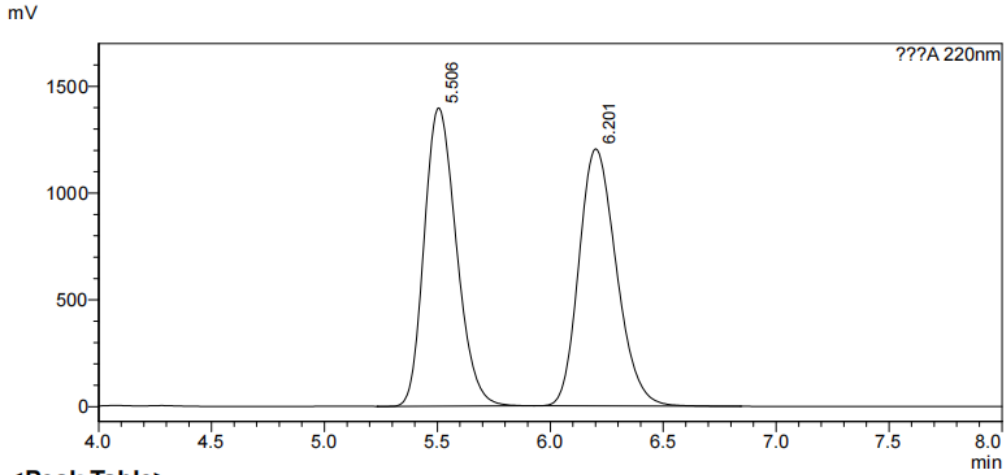

<Peak Table>

??A 220nm

| Peak# | Ret. Time | Area     | Height  | Conc.  | Unit | Mark | Name |
|-------|-----------|----------|---------|--------|------|------|------|
| 1     | 5.506     | 13851642 | 1397247 | 49.930 |      | M    |      |
| 2     | 6.201     | 13890250 | 1205402 | 50.070 |      | M    |      |
| Total |           | 27741892 | 2602649 |        |      |      |      |

<Chromatogram>

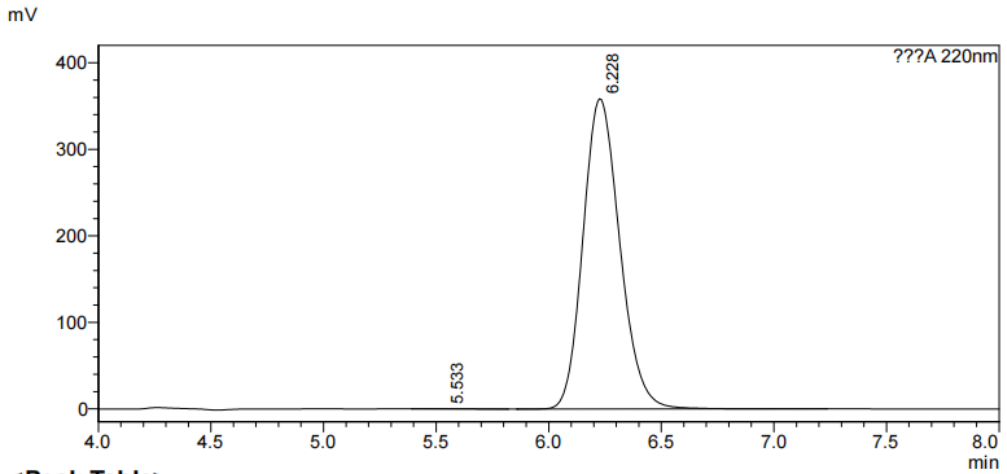

<Peak Table>

??A 220nm

| Peak# | Ret. Time | Area    | Height | Conc.  | Unit | Mark | Name |
|-------|-----------|---------|--------|--------|------|------|------|
| 1     | 5.533     | 1107    | 97     | 0.027  |      | M    |      |
| 2     | 6.228     | 4076172 | 358678 | 99.973 |      | M    |      |
| Total |           | 4077279 | 358775 |        |      |      |      |

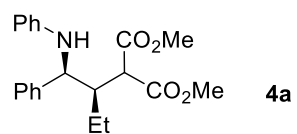

**<Chromatogram>**

mV

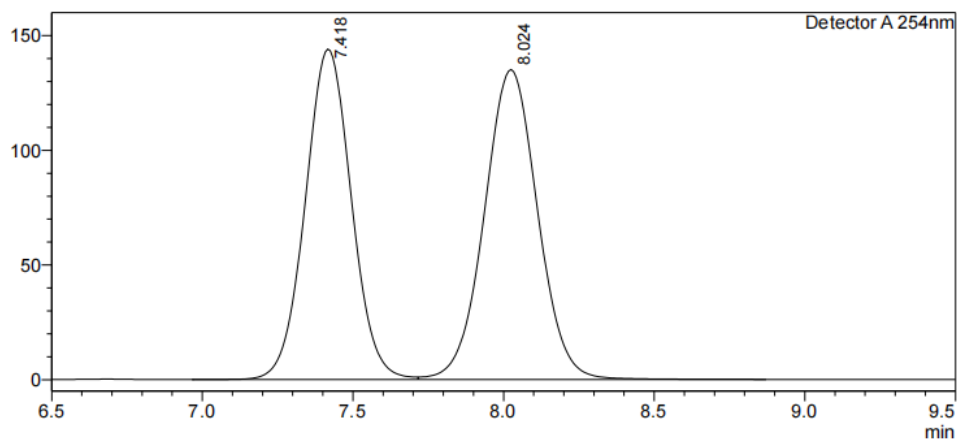

**<Peak Table>**

Detector A 254nm

| Peak# | Ret. Time | Area    | Height | Conc.  | Unit | Mark | Name |
|-------|-----------|---------|--------|--------|------|------|------|
| 1     | 7.418     | 1535584 | 144145 | 48.010 |      |      |      |
| 2     | 8.024     | 1662851 | 135109 | 51.990 |      | V    |      |
| Total |           | 3198435 | 279253 |        |      |      |      |

**<Chromatogram>**

mV

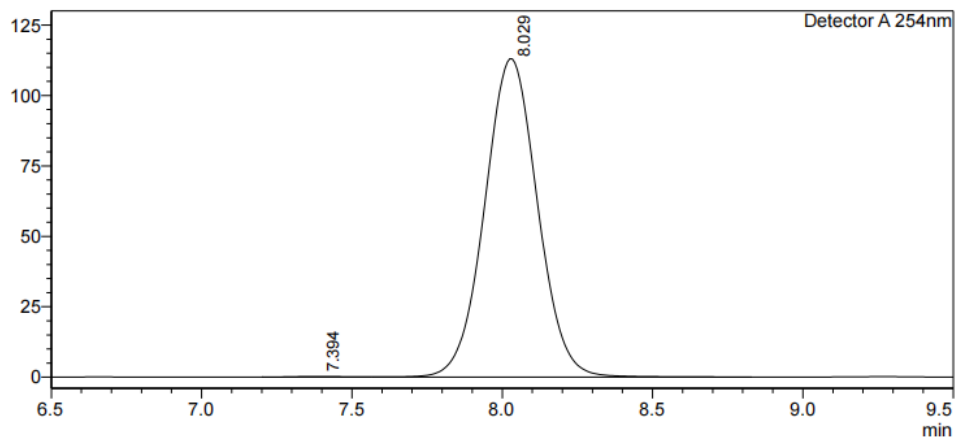

**<Peak Table>**

Detector A 254nm

| Peak# | Ret. Time | Area    | Height | Conc.  | Unit | Mark | Name |
|-------|-----------|---------|--------|--------|------|------|------|
| 1     | 7.394     | 2803    | 213    | 0.202  |      | V    |      |
| 2     | 8.029     | 1385447 | 113021 | 99.798 |      | V    |      |
| Total |           | 1388250 | 113234 |        |      |      |      |

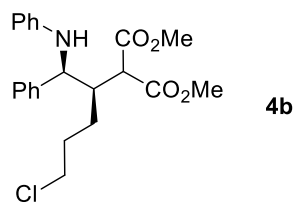

**<Chromatogram>**

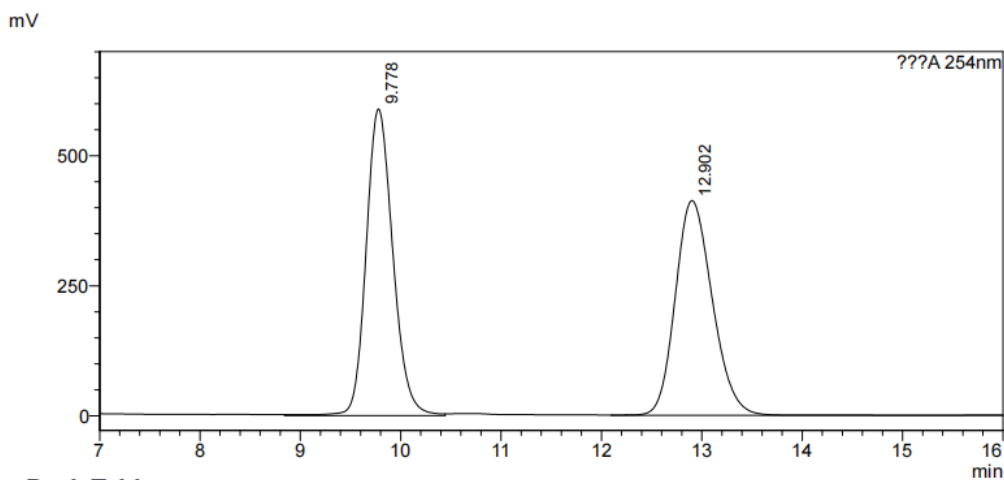

**<Peak Table>**

| ???A 254nm |           |          |         |        |      |      |      |
|------------|-----------|----------|---------|--------|------|------|------|
| Peak#      | Ret. Time | Area     | Height  | Conc.  | Unit | Mark | Name |
| 1          | 9.778     | 10922867 | 589133  | 50.636 |      |      |      |
| 2          | 12.902    | 10648302 | 413003  | 49.364 |      |      |      |
| Total      |           | 21571170 | 1002135 |        |      |      |      |

**<Chromatogram>**

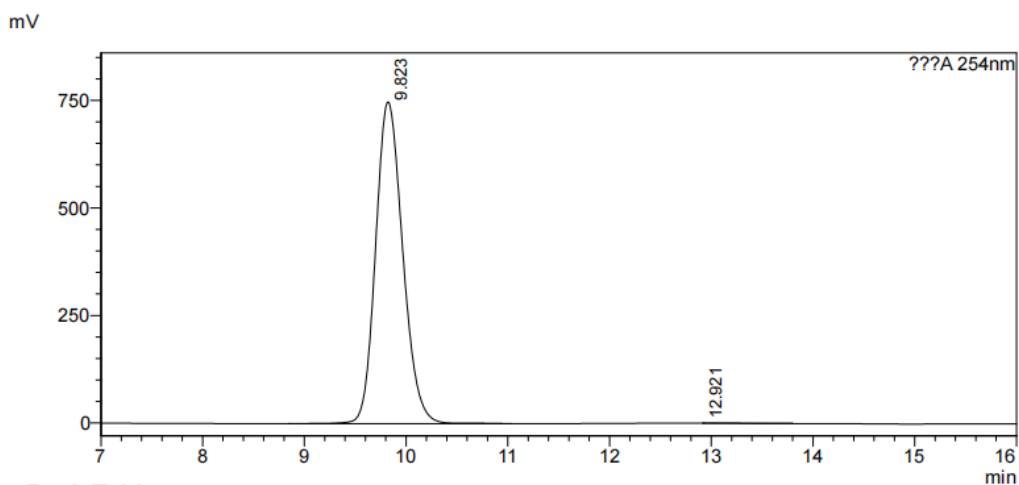

**<Peak Table>**

| ???A 254nm |           |          |        |        |      |      |      |
|------------|-----------|----------|--------|--------|------|------|------|
| Peak#      | Ret. Time | Area     | Height | Conc.  | Unit | Mark | Name |
| 1          | 9.823     | 13862964 | 748113 | 99.995 |      | M    |      |
| 2          | 12.921    | 682      | 5      | 0.005  |      | M    |      |
| Total      |           | 13863646 | 748118 |        |      |      |      |

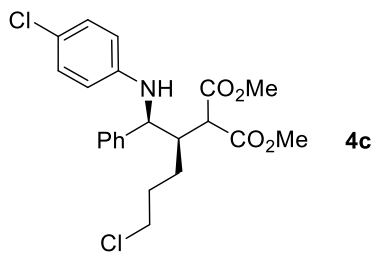

**<Chromatogram>**

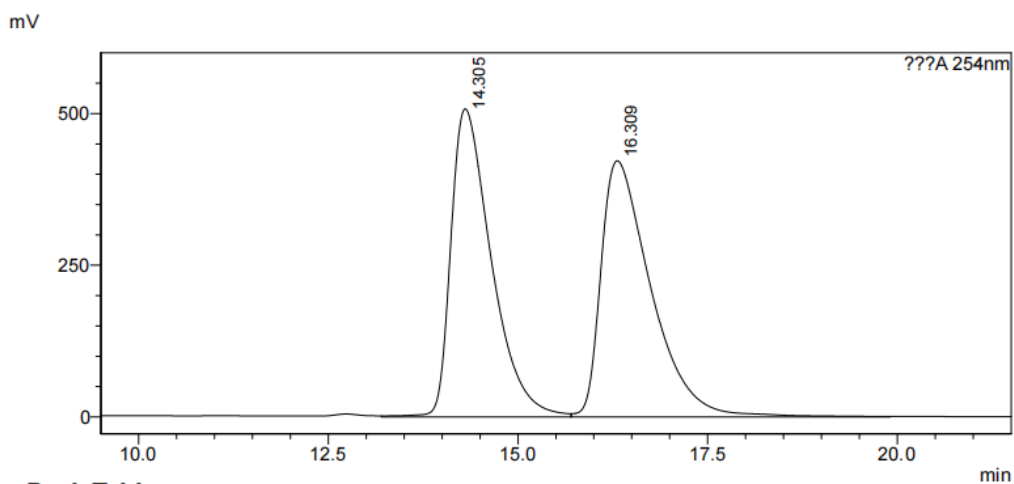

**<Peak Table>**

???A 254nm

| Peak# | Ret. Time | Area     | Height | Conc.  | Unit | Mark | Name |
|-------|-----------|----------|--------|--------|------|------|------|
| 1     | 14.305    | 18852248 | 507797 | 49.313 |      |      |      |
| 2     | 16.309    | 19377289 | 422074 | 50.687 |      | M    |      |
| Total |           | 38229537 | 929871 |        |      |      |      |

**<Chromatogram>**

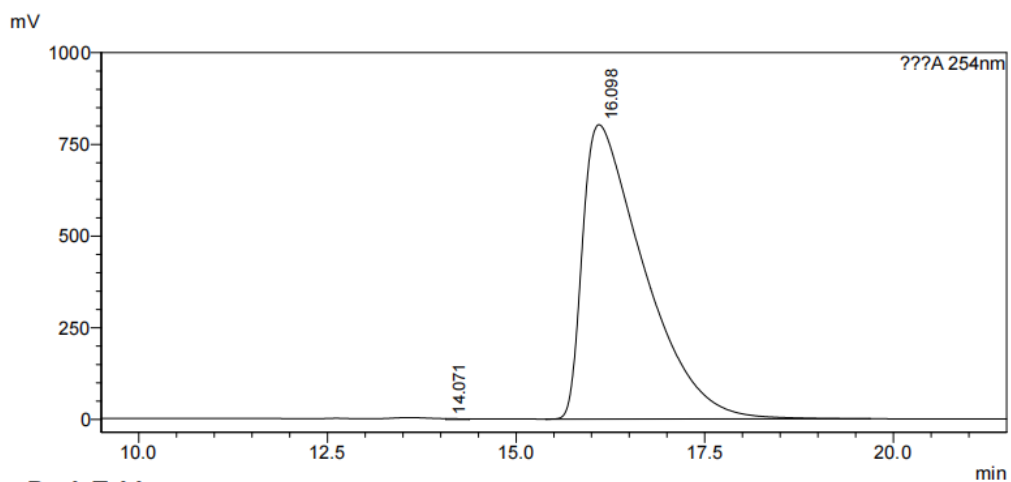

**<Peak Table>**

???A 254nm

| Peak# | Ret. Time | Area     | Height | Conc.  | Unit | Mark | Name |
|-------|-----------|----------|--------|--------|------|------|------|
| 1     | 14.071    | 38166    | 2387   | 0.084  |      | M    |      |
| 2     | 16.098    | 45541978 | 802411 | 99.916 |      | M    |      |
| Total |           | 45580144 | 804798 |        |      |      |      |

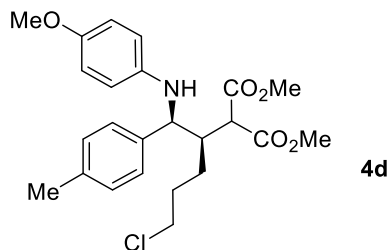

**<Chromatogram>**

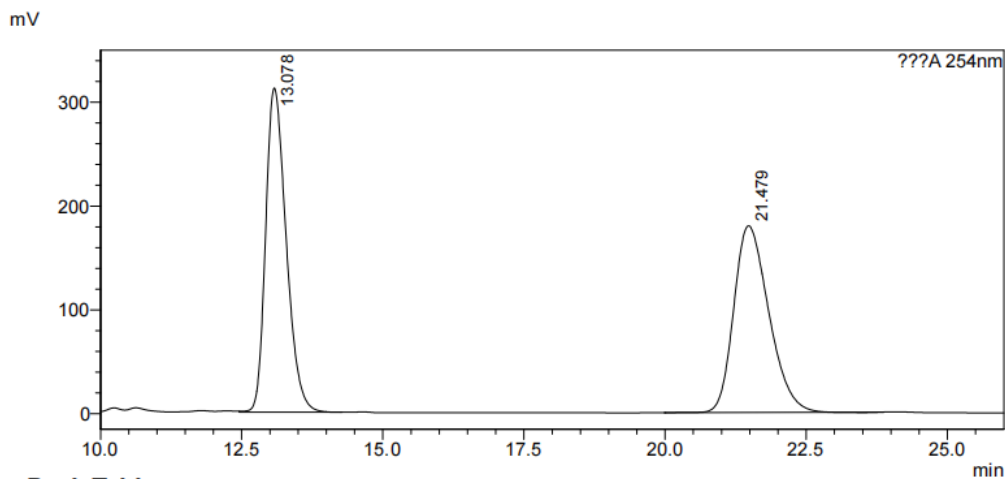

**<Peak Table>**

??A 254nm

| Peak# | Ret. Time | Area     | Height | Conc.  | Unit | Mark | Name |
|-------|-----------|----------|--------|--------|------|------|------|
| 1     | 13.078    | 7908777  | 312233 | 50.498 |      |      |      |
| 2     | 21.479    | 7752858  | 179725 | 49.502 |      | M    |      |
| Total |           | 15661634 | 491959 |        |      |      |      |

**<Chromatogram>**

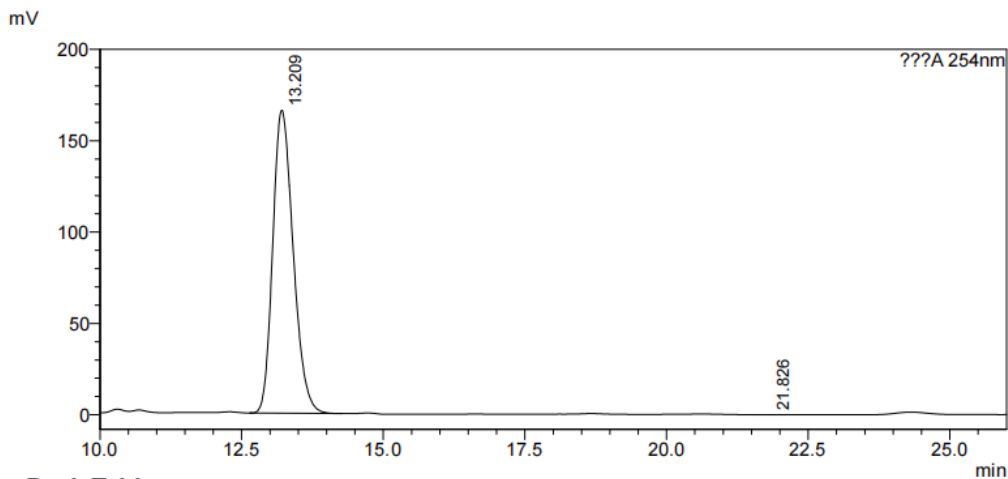

**<Peak Table>**

??A 254nm

| Peak# | Ret. Time | Area    | Height | Conc.  | Unit | Mark | Name |
|-------|-----------|---------|--------|--------|------|------|------|
| 1     | 13.209    | 4169986 | 165942 | 99.990 |      |      |      |
| 2     | 21.826    | 416     | 22     | 0.010  |      | M    |      |
| Total |           | 4170402 | 165963 |        |      |      |      |

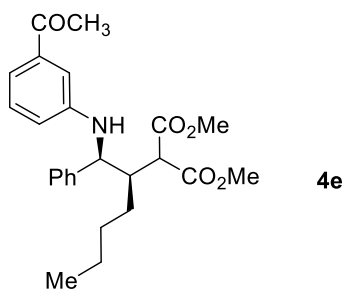

**<Chromatogram>**

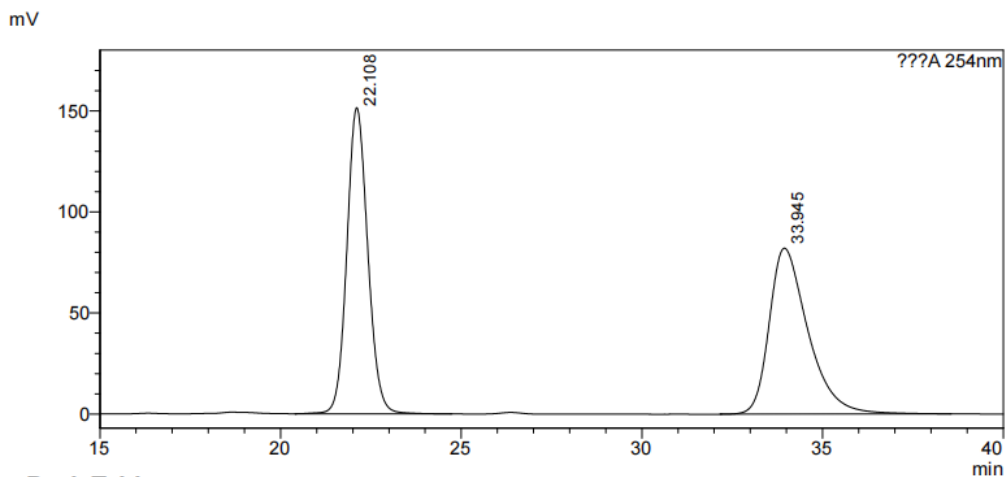

**<Peak Table>**

???A 254nm

| Peak# | Ret. Time | Area     | Height | Conc.  | Unit | Mark | Name |
|-------|-----------|----------|--------|--------|------|------|------|
| 1     | 22.108    | 6105598  | 151477 | 49.885 |      |      |      |
| 2     | 33.945    | 6133686  | 82103  | 50.115 |      |      |      |
| Total |           | 12239284 | 233580 |        |      |      |      |

**<Chromatogram>**

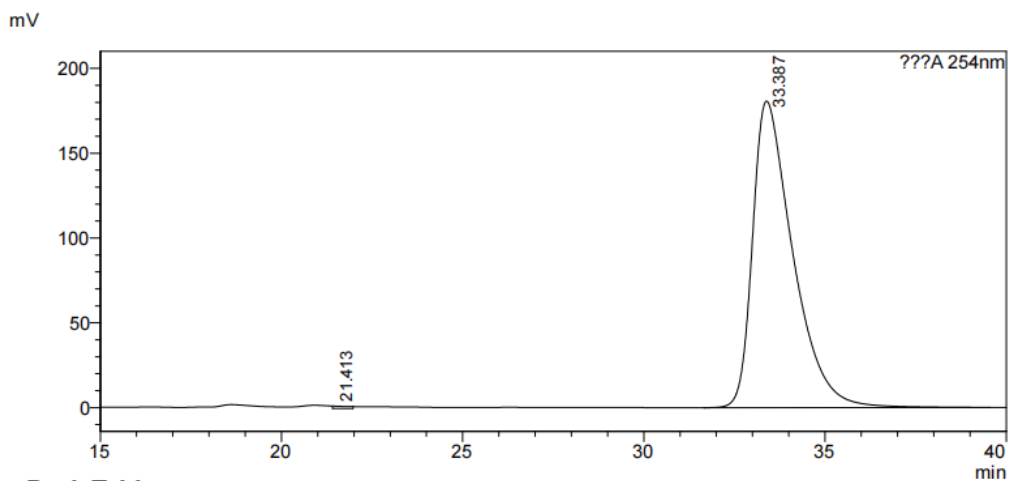

**<Peak Table>**

???A 254nm

| Peak# | Ret. Time | Area     | Height | Conc.  | Unit | Mark | Name |
|-------|-----------|----------|--------|--------|------|------|------|
| 1     | 21.413    | 40550    | 1393   | 0.290  |      | M    |      |
| 2     | 33.387    | 13963848 | 180677 | 99.710 |      |      |      |
| Total |           | 14004398 | 182070 |        |      |      |      |

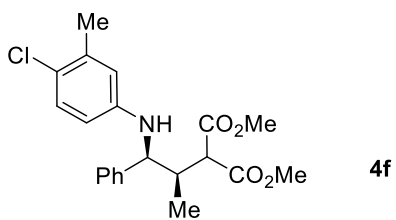

**<Chromatogram>**

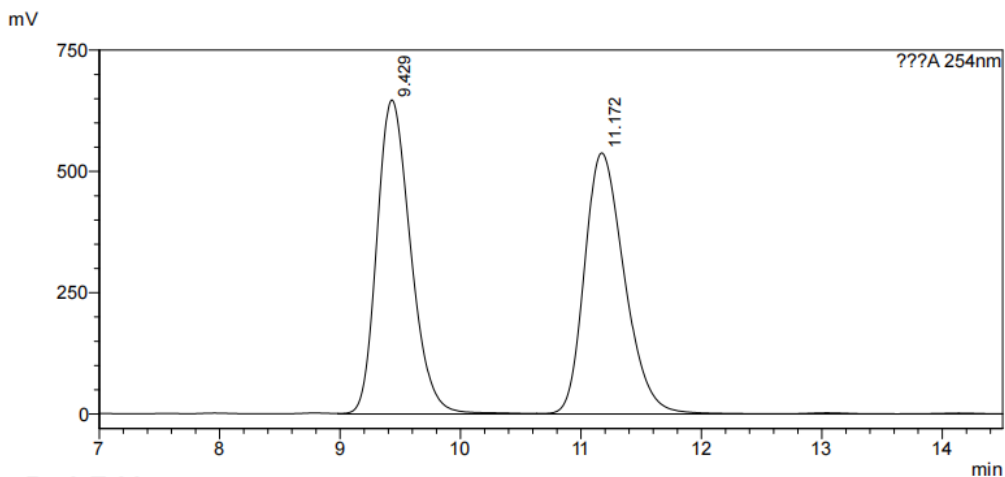

**<Peak Table>**

???A 254nm

| Peak# | Ret. Time | Area     | Height  | Conc.  | Unit | Mark | Name |
|-------|-----------|----------|---------|--------|------|------|------|
| 1     | 9.429     | 12620773 | 647201  | 50.207 |      |      |      |
| 2     | 11.172    | 12516531 | 538180  | 49.793 |      | V    |      |
| Total |           | 25137304 | 1185381 |        |      |      |      |

**<Chromatogram>**

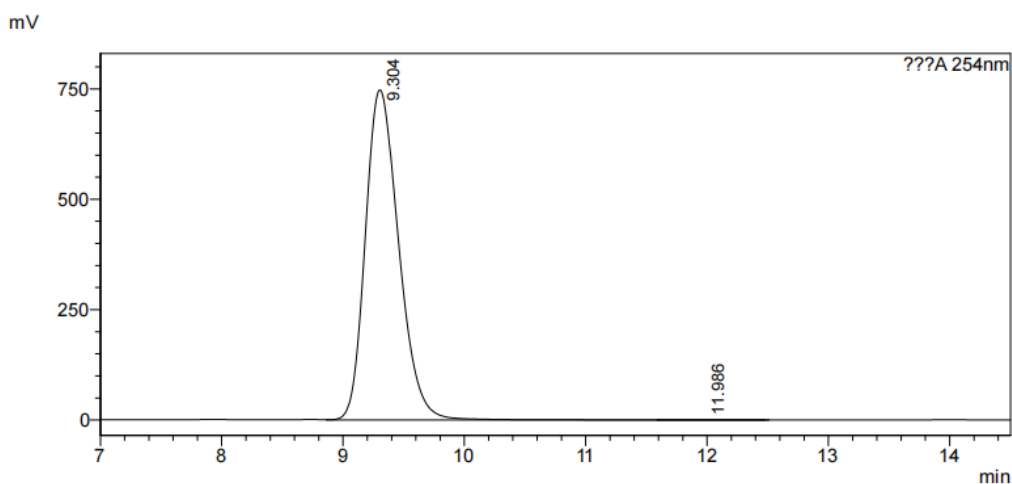

**<Peak Table>**

???A 254nm

| Peak# | Ret. Time | Area     | Height | Conc.  | Unit | Mark | Name |
|-------|-----------|----------|--------|--------|------|------|------|
| 1     | 9.304     | 14323249 | 747766 | 99.974 |      | S    |      |
| 2     | 11.986    | 3744     | 157    | 0.026  |      | T    |      |
| Total |           | 14326993 | 747923 |        |      |      |      |

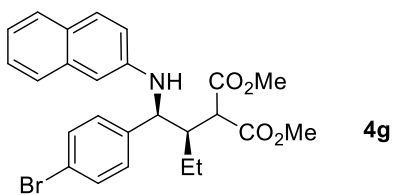

**<Chromatogram>**

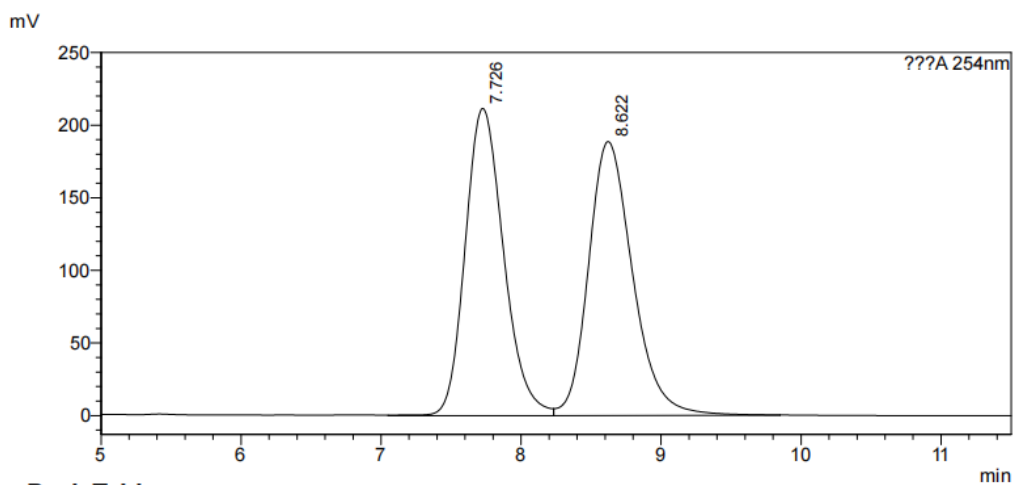

**<Peak Table>**

???A 254nm

| Peak# | Ret. Time | Area    | Height | Conc.  | Unit | Mark | Name |
|-------|-----------|---------|--------|--------|------|------|------|
| 1     | 7.726     | 4038891 | 211659 | 49.417 |      |      |      |
| 2     | 8.622     | 4134156 | 188685 | 50.583 |      | M    |      |
| Total |           | 8173047 | 400344 |        |      |      |      |

**<Chromatogram>**

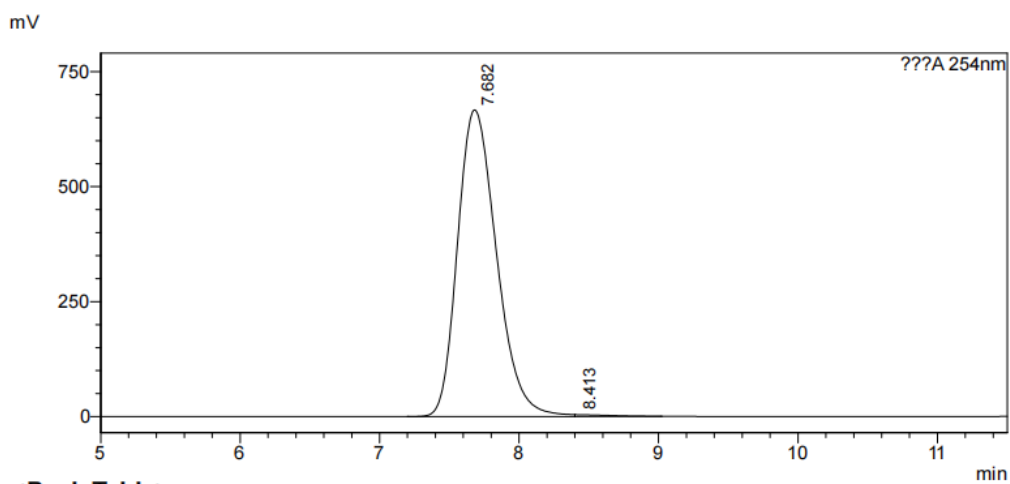

**<Peak Table>**

???A 254nm

| Peak# | Ret. Time | Area     | Height | Conc.  | Unit | Mark | Name |
|-------|-----------|----------|--------|--------|------|------|------|
| 1     | 7.682     | 12956712 | 666814 | 99.473 |      | M    |      |
| 2     | 8.413     | 68671    | 4023   | 0.527  |      | M    |      |
| Total |           | 13025383 | 670837 |        |      |      |      |

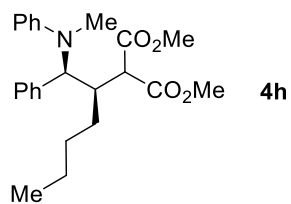

<Chromatogram>

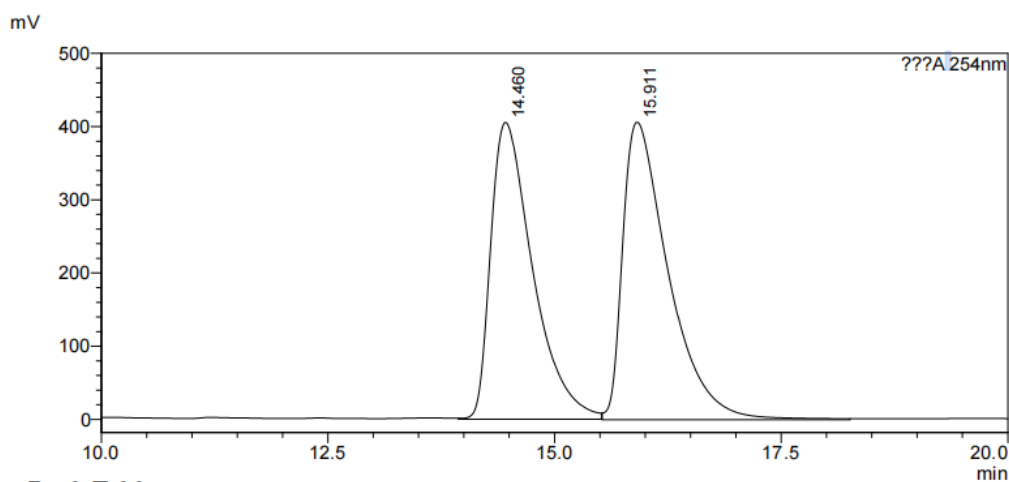

<Peak Table>

| Peak# | Ret. Time | Area     | Height | Conc.  | Unit | Mark | Name |
|-------|-----------|----------|--------|--------|------|------|------|
| 1     | 14.460    | 13085385 | 405660 | 47.920 |      |      |      |
| 2     | 15.911    | 14221604 | 406318 | 52.080 |      | M    |      |
| Total |           | 27306989 | 811978 |        |      |      |      |

<Chromatogram>

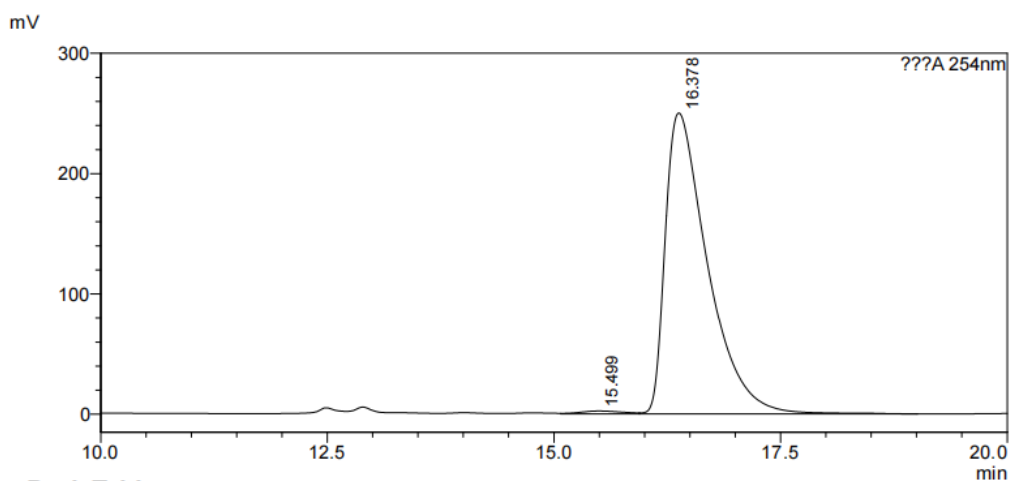

<Peak Table>

| Peak# | Ret. Time | Area    | Height | Conc.  | Unit | Mark | Name |
|-------|-----------|---------|--------|--------|------|------|------|
| 1     | 15.499    | 84056   | 2507   | 1.025  |      |      |      |
| 2     | 16.378    | 8120175 | 250171 | 98.975 |      | V    |      |
| Total |           | 8204231 | 252678 |        |      |      |      |

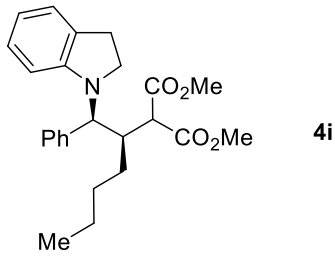

**<Chromatogram>**

mV

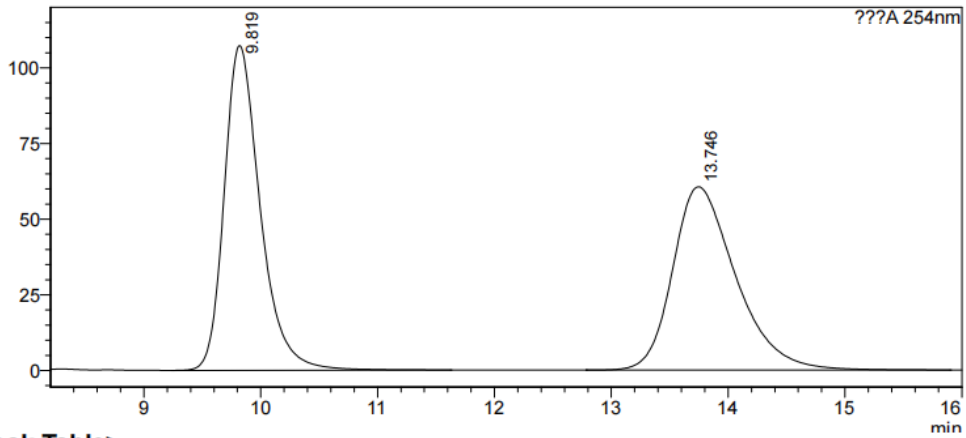

**<Peak Table>**

???A 254nm

| Peak# | Ret. Time | Area    | Height | Conc.  | Unit | Mark | Name |
|-------|-----------|---------|--------|--------|------|------|------|
| 1     | 9.819     | 2301155 | 107334 | 50.253 |      |      |      |
| 2     | 13.746    | 2277973 | 60567  | 49.747 |      |      |      |
| Total |           | 4579127 | 167900 |        |      |      |      |

**<Chromatogram>**

mV

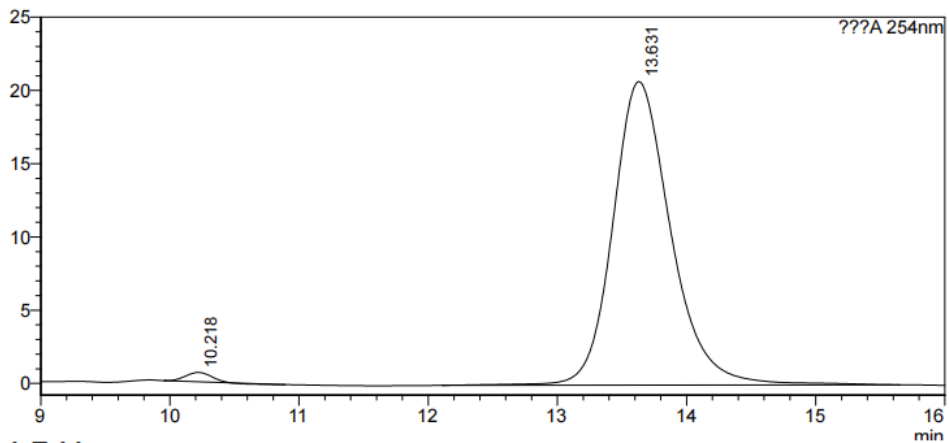

**<Peak Table>**

???A 254nm

| Peak# | Ret. Time | Area   | Height | Conc.  | Unit | Mark | Name |
|-------|-----------|--------|--------|--------|------|------|------|
| 1     | 10.218    | 8335   | 636    | 1.268  |      | M    |      |
| 2     | 13.631    | 649089 | 20714  | 98.732 |      |      |      |
| Total |           | 657424 | 21349  |        |      |      |      |

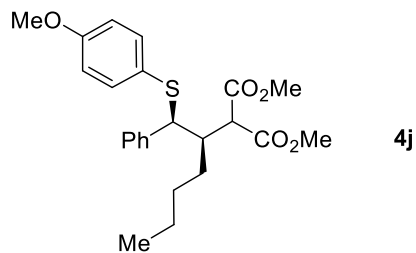

**<Chromatogram>**

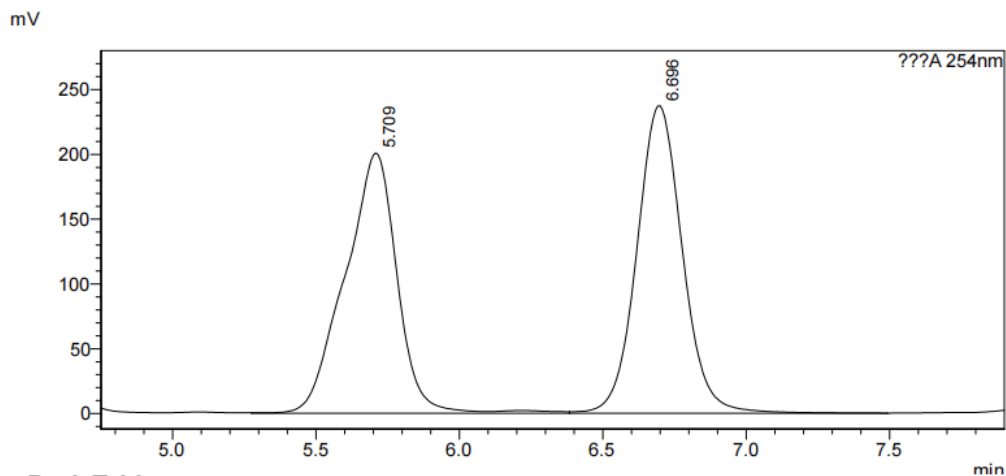

**<Peak Table>**

??A 254nm

| Peak# | Ret. Time | Area    | Height | Conc.  | Unit | Mark | Name |
|-------|-----------|---------|--------|--------|------|------|------|
| 1     | 5.709     | 2545955 | 200956 | 49.174 |      |      |      |
| 2     | 6.696     | 2631460 | 237418 | 50.826 |      | V    |      |
| Total |           | 5177415 | 438373 |        |      |      |      |

**<Chromatogram>**

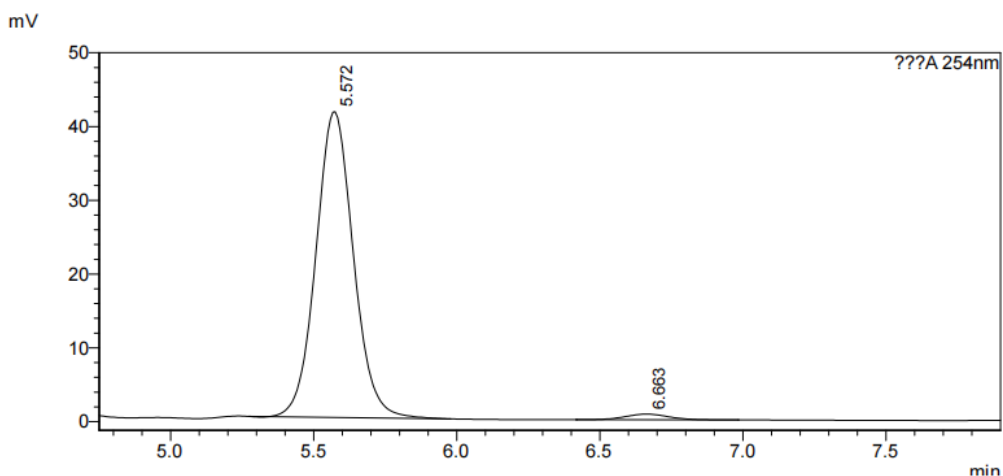

**<Peak Table>**

??A 254nm

| Peak# | Ret. Time | Area   | Height | Conc.  | Unit | Mark | Name |
|-------|-----------|--------|--------|--------|------|------|------|
| 1     | 5.572     | 377830 | 41461  | 97.901 |      | M    |      |
| 2     | 6.663     | 8102   | 767    | 2.099  |      |      |      |
| Total |           | 385932 | 42227  |        |      |      |      |

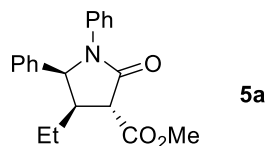

**<Chromatogram>**

mV

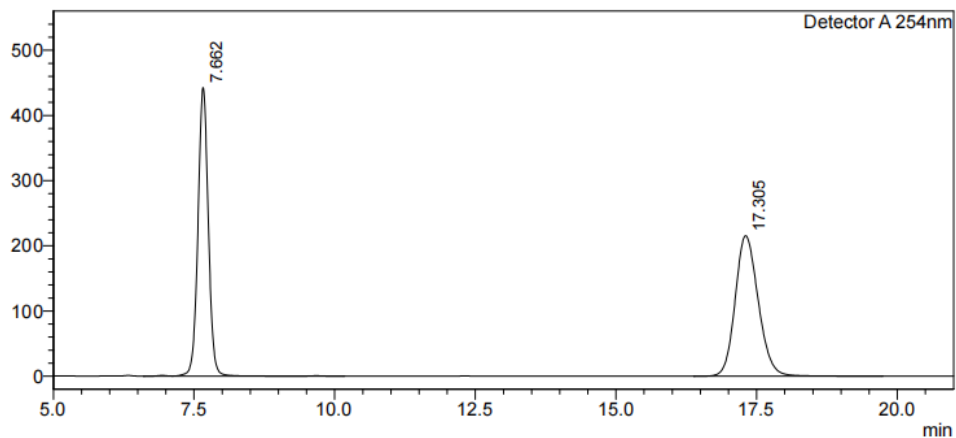

**<Peak Table>**

Detector A 254nm

| Peak# | Ret. Time | Area     | Height | Conc.  | Unit | Mark | Name |
|-------|-----------|----------|--------|--------|------|------|------|
| 1     | 7.662     | 5698914  | 442622 | 48.051 |      | M    |      |
| 2     | 17.305    | 6161258  | 215509 | 51.949 |      | S    |      |
| Total |           | 11860172 | 658131 |        |      |      |      |

**<Chromatogram>**

mV

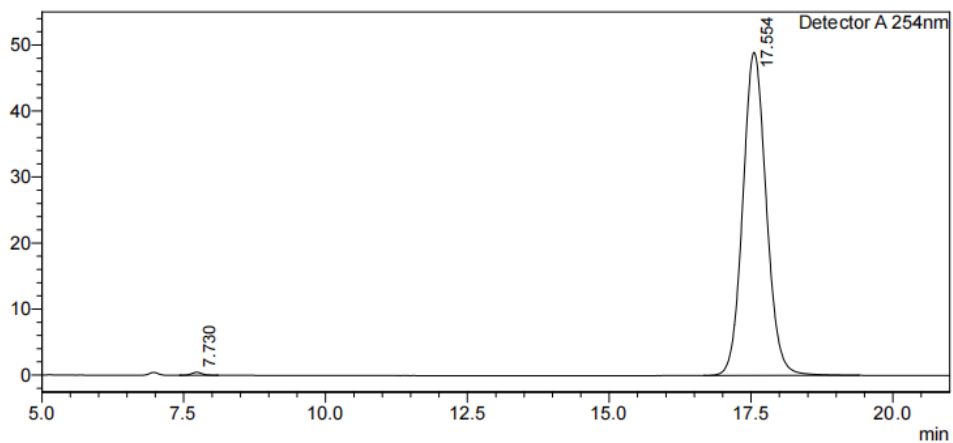

**<Peak Table>**

Detector A 254nm

| Peak# | Ret. Time | Area    | Height | Conc.  | Unit | Mark | Name |
|-------|-----------|---------|--------|--------|------|------|------|
| 1     | 7.730     | 5888    | 457    | 0.416  |      |      |      |
| 2     | 17.554    | 1409460 | 48979  | 99.584 |      |      |      |
| Total |           | 1415348 | 49436  |        |      |      |      |

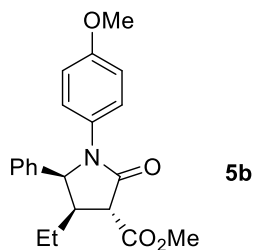

**<Chromatogram>**

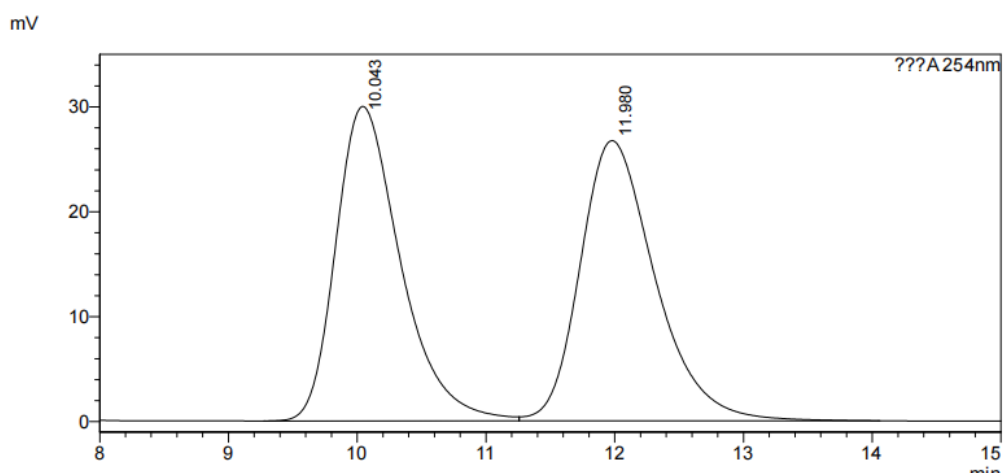

**<Peak Table>**

??A 254nm

| Peak# | Ret. Time | Area    | Height | Conc.  | Unit | Mark | Name |
|-------|-----------|---------|--------|--------|------|------|------|
| 1     | 10.043    | 1050208 | 29975  | 49.281 |      |      |      |
| 2     | 11.980    | 1080848 | 26707  | 50.719 |      | V    |      |
| Total |           | 2131056 | 56683  |        |      |      |      |

**<Chromatogram>**

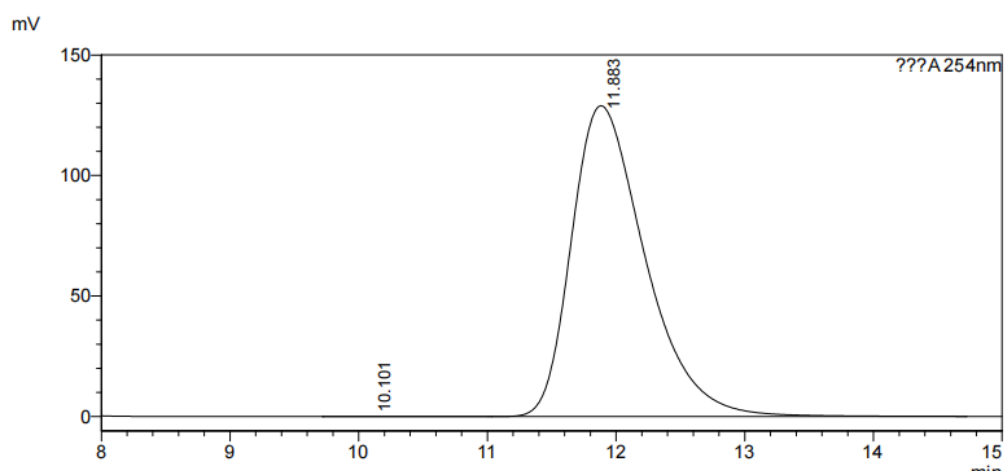

**<Peak Table>**

??A 254nm

| Peak# | Ret. Time | Area    | Height | Conc.  | Unit | Mark | Name |
|-------|-----------|---------|--------|--------|------|------|------|
| 1     | 10.101    | 696     | 29     | 0.014  |      | M    |      |
| 2     | 11.883    | 5138429 | 128959 | 99.986 |      |      |      |
| Total |           | 5139125 | 128988 |        |      |      |      |

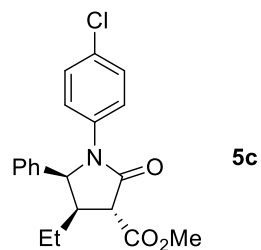

**<Chromatogram>**

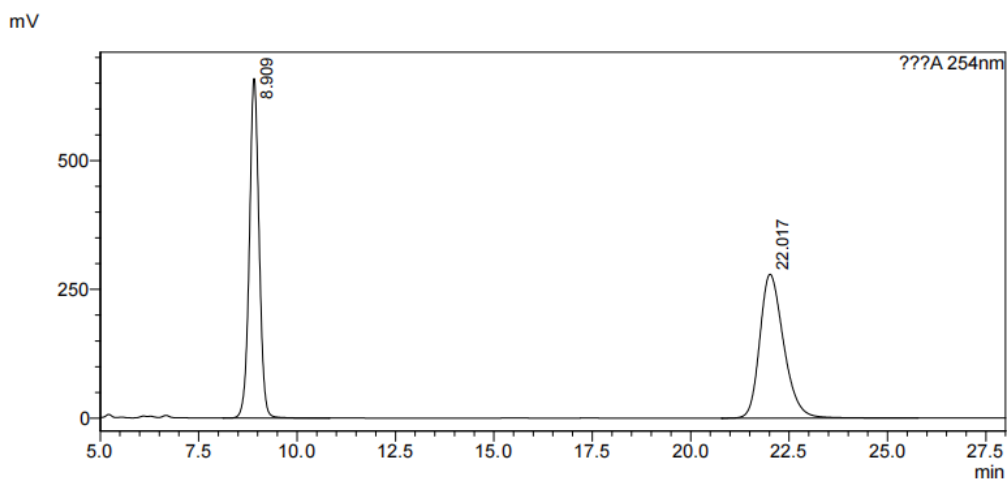

**<Peak Table>**

???A 254nm

| Peak# | Ret. Time | Area     | Height | Conc.  | Unit | Mark | Name |
|-------|-----------|----------|--------|--------|------|------|------|
| 1     | 8.909     | 11340979 | 659241 | 49.018 |      |      |      |
| 2     | 22.017    | 11795588 | 279159 | 50.982 |      |      |      |
| Total |           | 23136567 | 938400 |        |      |      |      |

**<Chromatogram>**

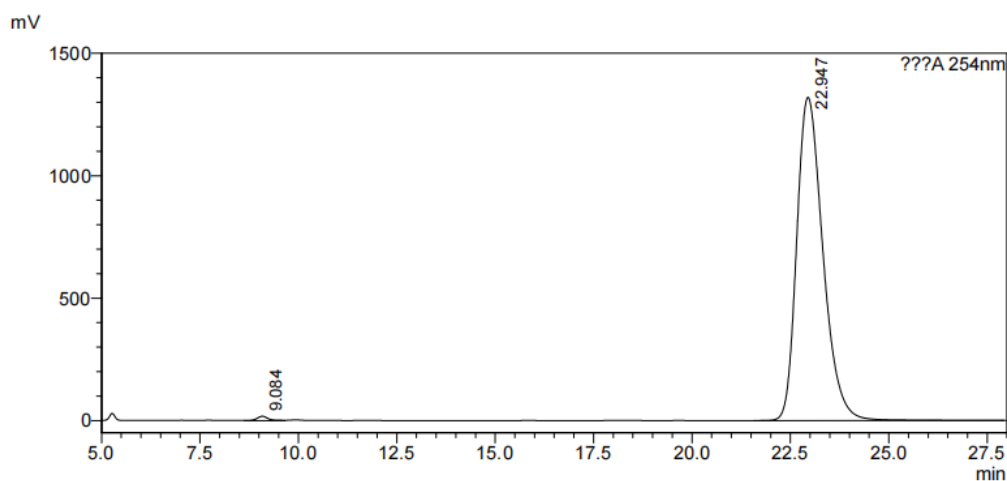

**<Peak Table>**

???A 254nm

| Peak# | Ret. Time | Area     | Height  | Conc.  | Unit | Mark | Name |
|-------|-----------|----------|---------|--------|------|------|------|
| 1     | 9.084     | 341869   | 17469   | 0.556  |      |      |      |
| 2     | 22.947    | 61119036 | 1320566 | 99.444 |      |      |      |
| Total |           | 61460904 | 1338034 |        |      |      |      |

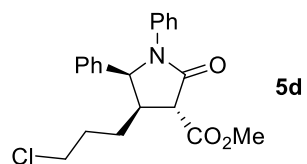

**<Chromatogram>**

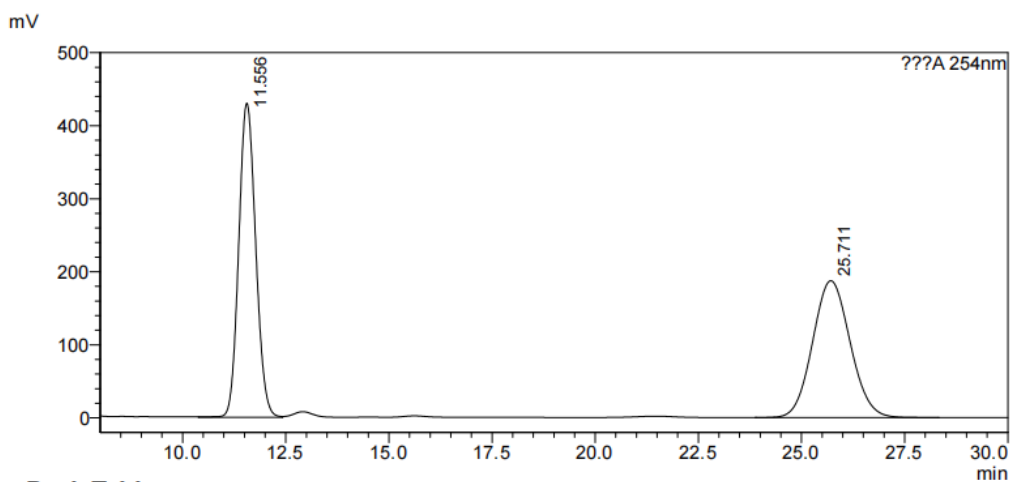

**<Peak Table>**

???A 254nm

| Peak# | Ret. Time | Area     | Height | Conc.  | Unit | Mark | Name |
|-------|-----------|----------|--------|--------|------|------|------|
| 1     | 11.556    | 12312412 | 430261 | 50.959 |      |      |      |
| 2     | 25.711    | 11848856 | 187306 | 49.041 |      |      |      |
| Total |           | 24161268 | 617567 |        |      |      |      |

**<Chromatogram>**

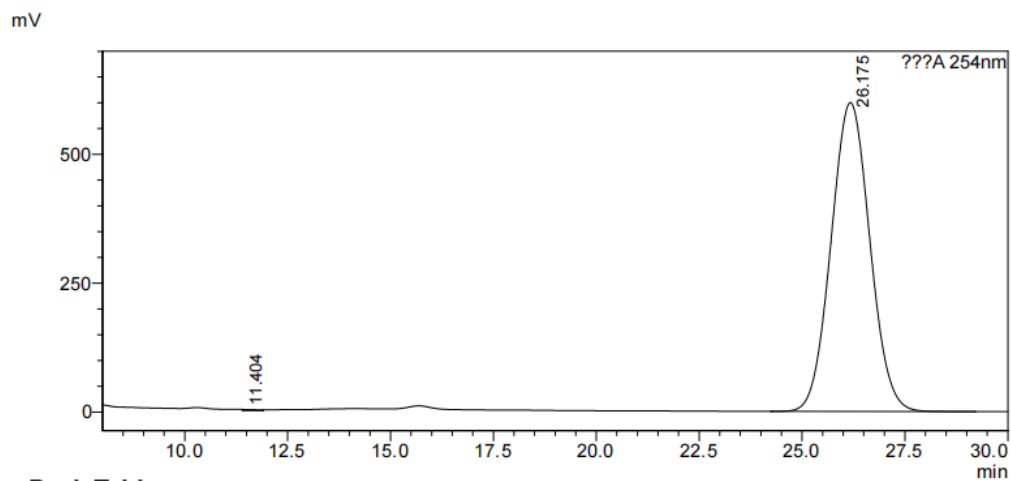

**<Peak Table>**

???A 254nm

| Peak# | Ret. Time | Area     | Height | Conc.  | Unit | Mark | Name |
|-------|-----------|----------|--------|--------|------|------|------|
| 1     | 11.404    | 49512    | 1991   | 0.126  |      | M    |      |
| 2     | 26.175    | 39309746 | 599274 | 99.874 |      |      |      |
| Total |           | 39359258 | 601264 |        |      |      |      |

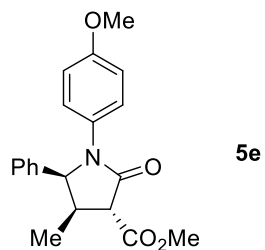

**<Chromatogram>**

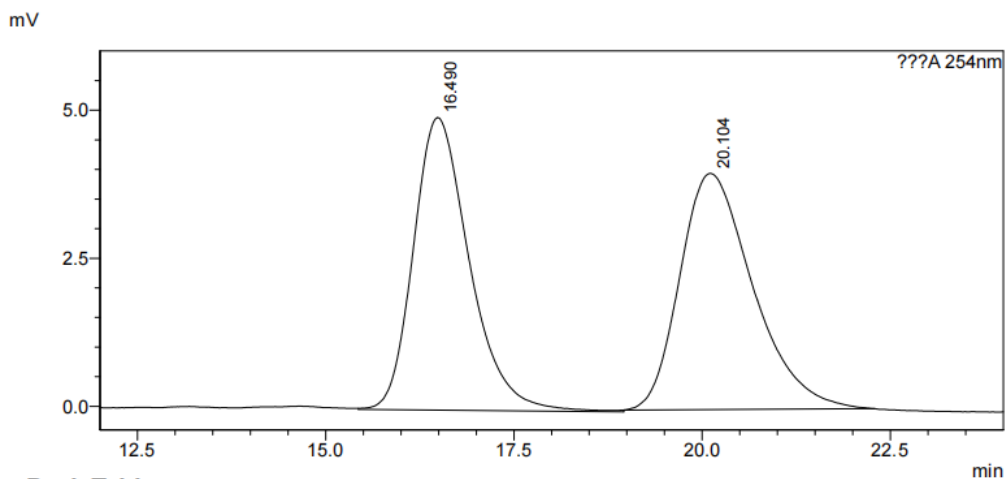

**<Peak Table>**

???A 254nm

| Peak# | Ret. Time | Area   | Height | Conc.  | Unit | Mark | Name |
|-------|-----------|--------|--------|--------|------|------|------|
| 1     | 16.490    | 255741 | 4939   | 48.727 |      | M    |      |
| 2     | 20.104    | 269102 | 3987   | 51.273 |      |      |      |
| Total |           | 524843 | 8926   |        |      |      |      |

**<Chromatogram>**

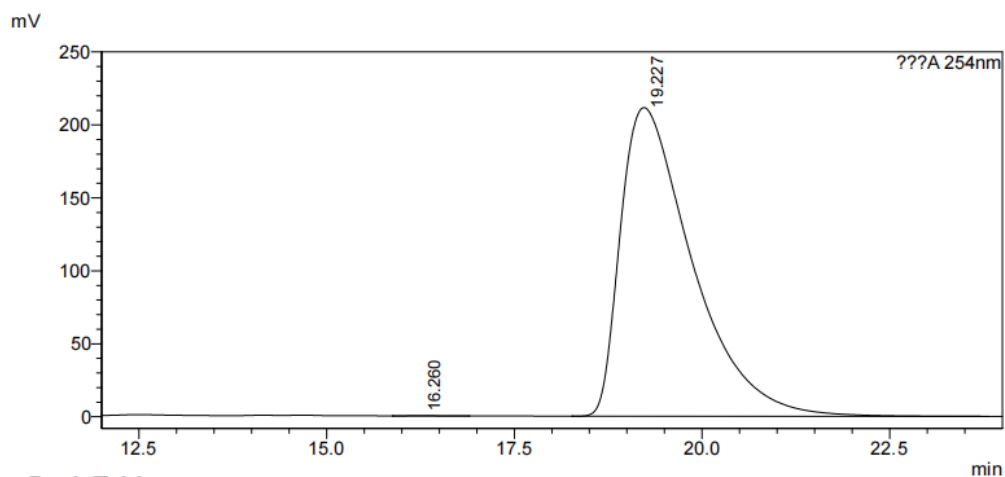

**<Peak Table>**

???A 254nm

| Peak# | Ret. Time | Area     | Height | Conc.  | Unit | Mark | Name |
|-------|-----------|----------|--------|--------|------|------|------|
| 1     | 16.260    | 5176     | 174    | 0.037  |      |      |      |
| 2     | 19.227    | 14098941 | 211527 | 99.963 |      |      |      |
| Total |           | 14104116 | 211701 |        |      |      |      |

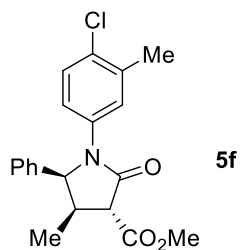

**<Chromatogram>**

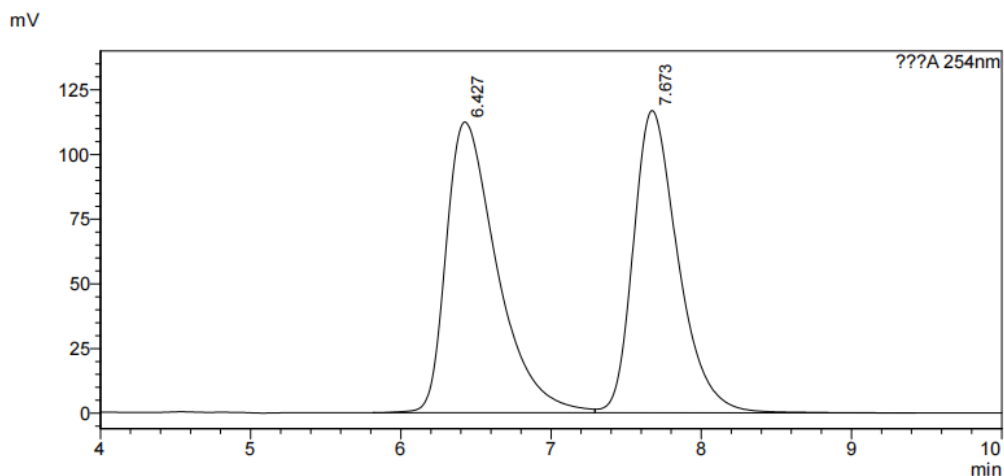

**<Peak Table>**

???A 254nm

| Peak# | Ret. Time | Area    | Height | Conc.  | Unit | Mark | Name |
|-------|-----------|---------|--------|--------|------|------|------|
| 1     | 6.427     | 2641975 | 112380 | 52.176 |      |      |      |
| 2     | 7.673     | 2421607 | 116872 | 47.824 |      | V    |      |
| Total |           | 5063582 | 229252 |        |      |      |      |

**<Chromatogram>**

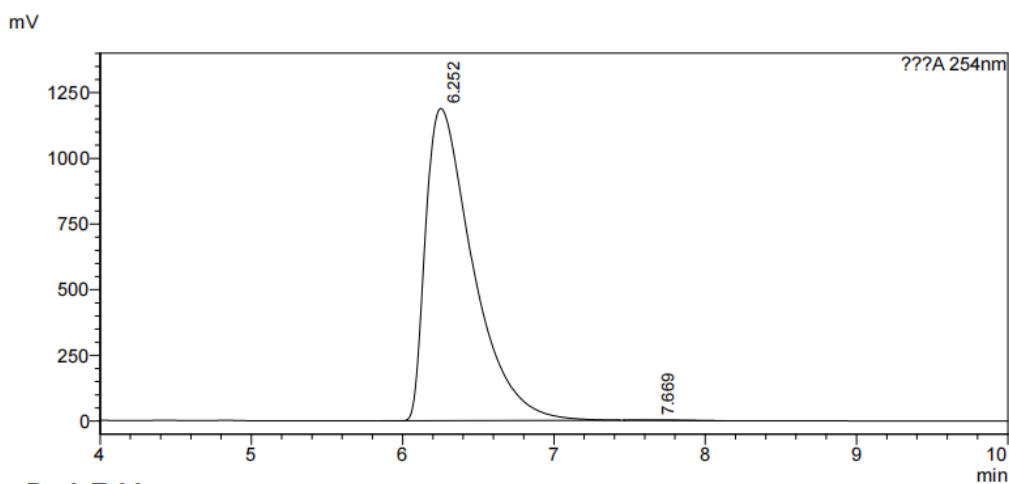

**<Peak Table>**

???A 254nm

| Peak# | Ret. Time | Area     | Height  | Conc.  | Unit | Mark | Name |
|-------|-----------|----------|---------|--------|------|------|------|
| 1     | 6.252     | 25721597 | 1188636 | 99.877 |      | M    |      |
| 2     | 7.669     | 31740    | 1508    | 0.123  |      |      |      |
| Total |           | 25753337 | 1190145 |        |      |      |      |

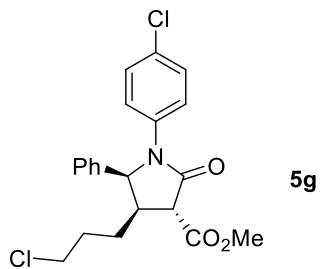

**<Chromatogram>**

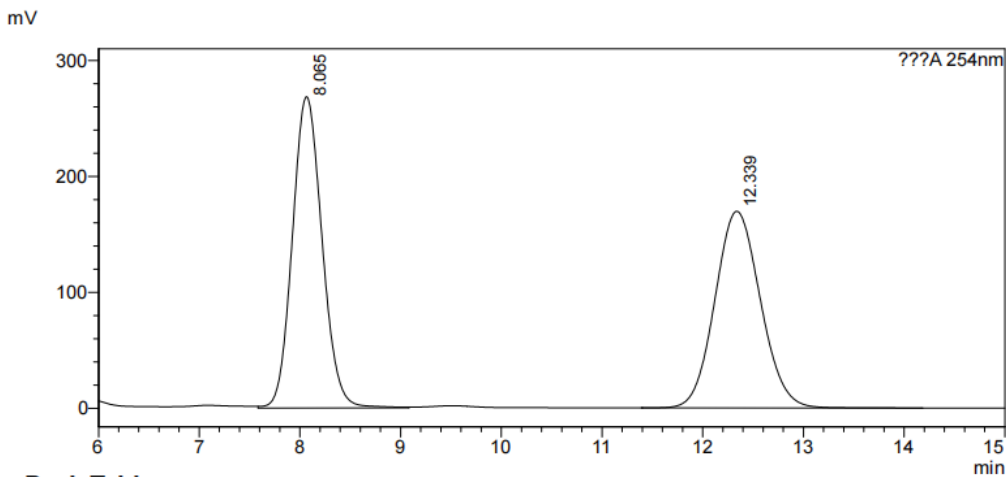

**<Peak Table>**

???A 254nm

| Peak# | Ret. Time | Area     | Height | Conc.  | Unit | Mark | Name |
|-------|-----------|----------|--------|--------|------|------|------|
| 1     | 8.065     | 5512346  | 268540 | 50.845 |      |      |      |
| 2     | 12.339    | 5329085  | 169598 | 49.155 |      |      |      |
| Total |           | 10841431 | 438138 |        |      |      |      |

**<Chromatogram>**

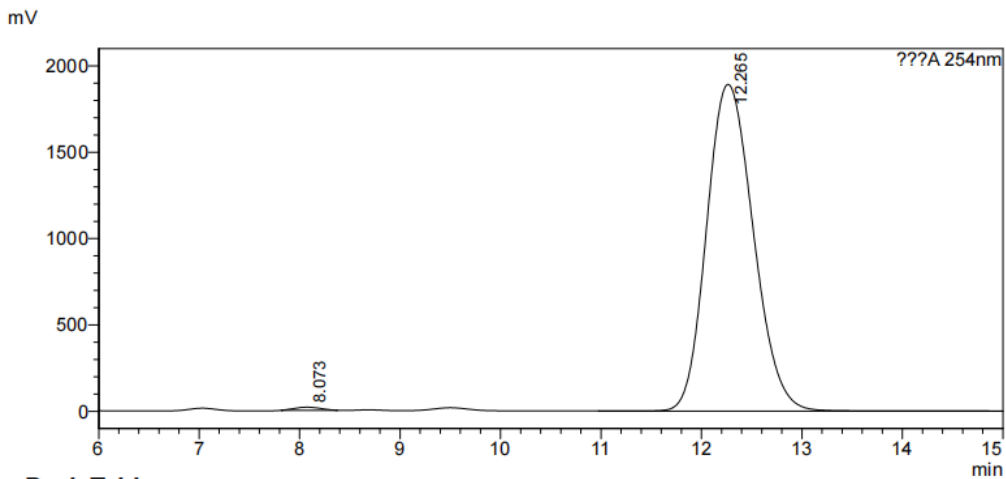

**<Peak Table>**

???A 254nm

| Peak# | Ret. Time | Area     | Height  | Conc.  | Unit | Mark | Name |
|-------|-----------|----------|---------|--------|------|------|------|
| 1     | 8.073     | 320053   | 17839   | 0.520  |      | M    |      |
| 2     | 12.265    | 61212165 | 1892564 | 99.480 |      |      |      |
| Total |           | 61532218 | 1910403 |        |      |      |      |

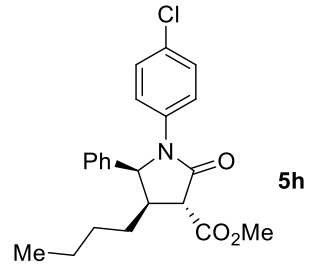

<Chromatogram>

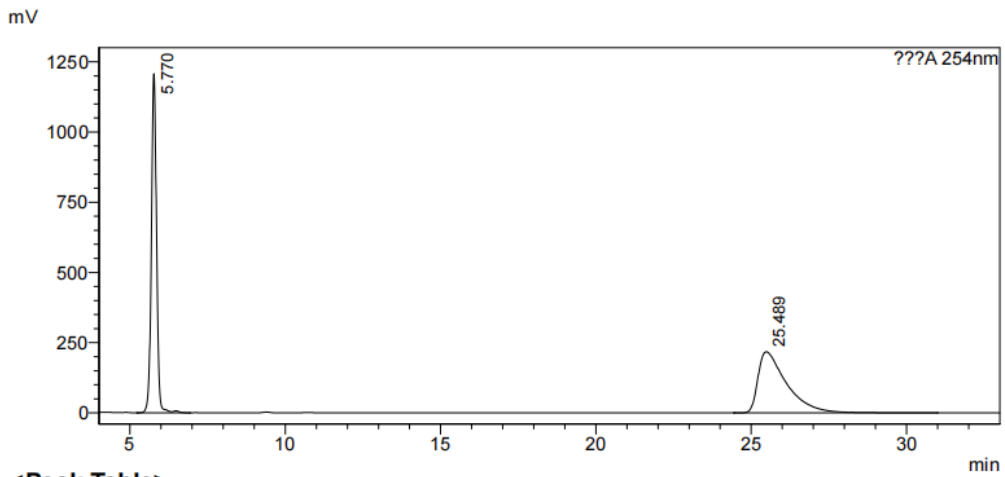

<Peak Table>

| Peak# | Ret. Time | Area     | Height  | Conc.  | Unit | Mark | Name |
|-------|-----------|----------|---------|--------|------|------|------|
| 1     | 5.770     | 14007127 | 1207083 | 50.173 |      | M    |      |
| 2     | 25.489    | 13910505 | 217439  | 49.827 |      |      |      |
| Total |           | 27917632 | 1424521 |        |      |      |      |

<Chromatogram>

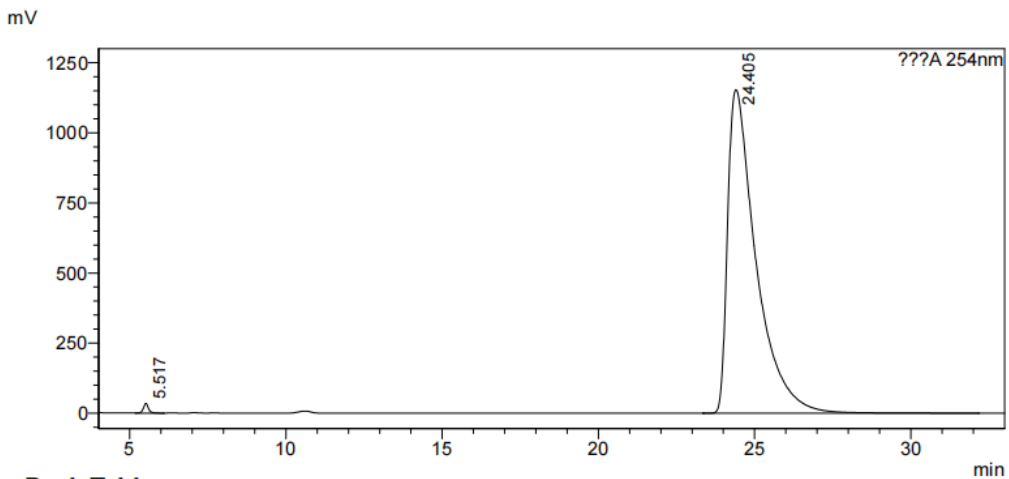

<Peak Table>

| Peak# | Ret. Time | Area     | Height  | Conc.  | Unit | Mark | Name |
|-------|-----------|----------|---------|--------|------|------|------|
| 1     | 5.517     | 408168   | 35063   | 0.557  |      |      |      |
| 2     | 24.405    | 72886552 | 1153892 | 99.443 |      | S    |      |
| Total |           | 73294720 | 1188955 |        |      |      |      |

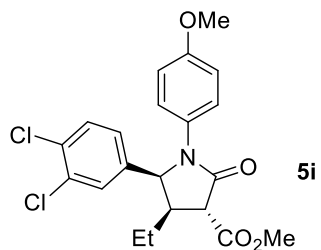

**<Chromatogram>**

mV

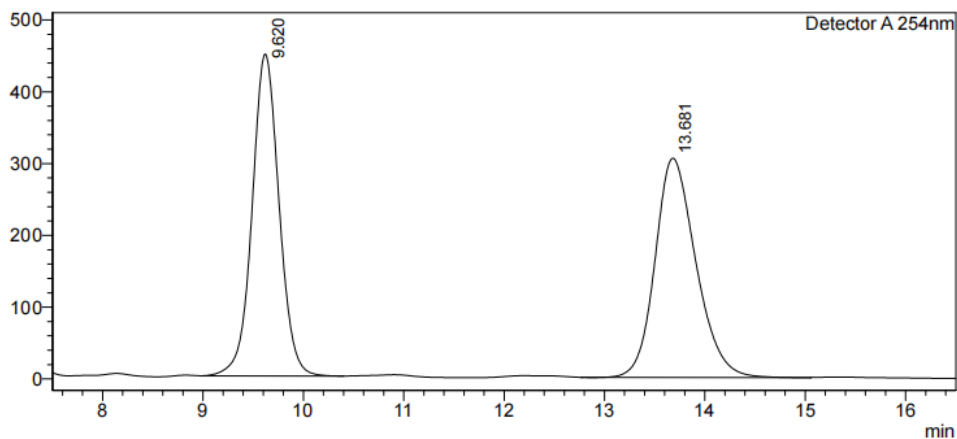

**<Peak Table>**

Detector A 254nm

| Peak# | Ret. Time | Area     | Height | Conc.  | Unit | Mark | Name |
|-------|-----------|----------|--------|--------|------|------|------|
| 1     | 9.620     | 8371914  | 448336 | 49.248 |      |      |      |
| 2     | 13.681    | 8627611  | 305393 | 50.752 |      | M    |      |
| Total |           | 16999526 | 753728 |        |      |      |      |

**<Chromatogram>**

mV

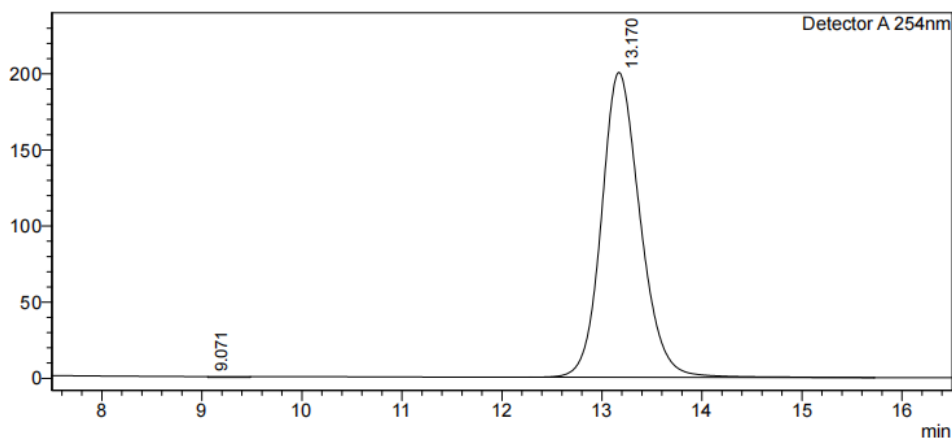

**<Peak Table>**

Detector A 254nm

| Peak# | Ret. Time | Area    | Height | Conc.  | Unit | Mark | Name |
|-------|-----------|---------|--------|--------|------|------|------|
| 1     | 9.071     | 11883   | 493    | 0.220  |      | M    |      |
| 2     | 13.170    | 5384495 | 200292 | 99.780 |      |      |      |
| Total |           | 5396378 | 200785 |        |      |      |      |

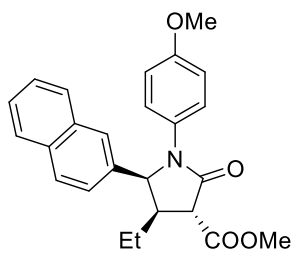

**<Chromatogram>**

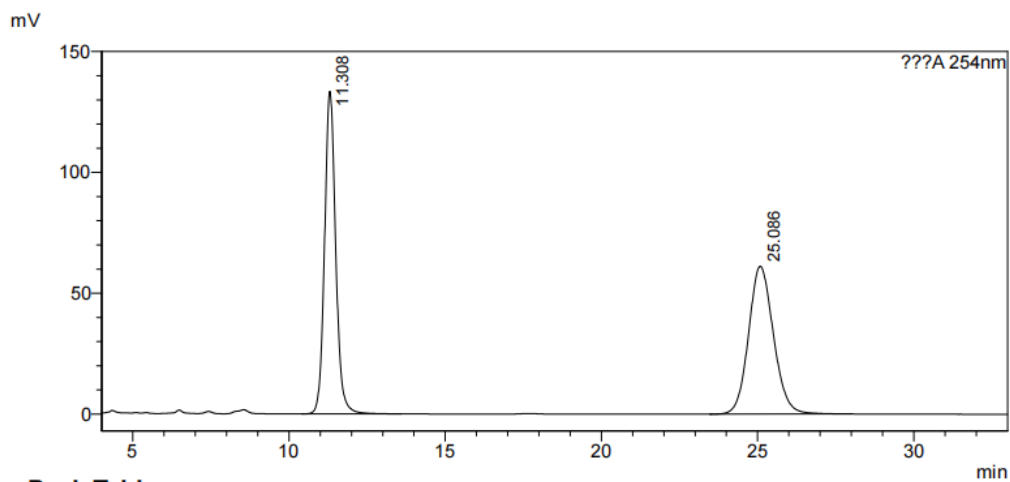

**<Peak Table>**

???A 254nm

| Peak# | Ret. Time | Area    | Height | Conc.  | Unit | Mark | Name |
|-------|-----------|---------|--------|--------|------|------|------|
| 1     | 11.308    | 3310705 | 133497 | 49.333 |      |      |      |
| 2     | 25.086    | 3400215 | 61176  | 50.667 |      |      |      |
| Total |           | 6710921 | 194673 |        |      |      |      |

**<Chromatogram>**

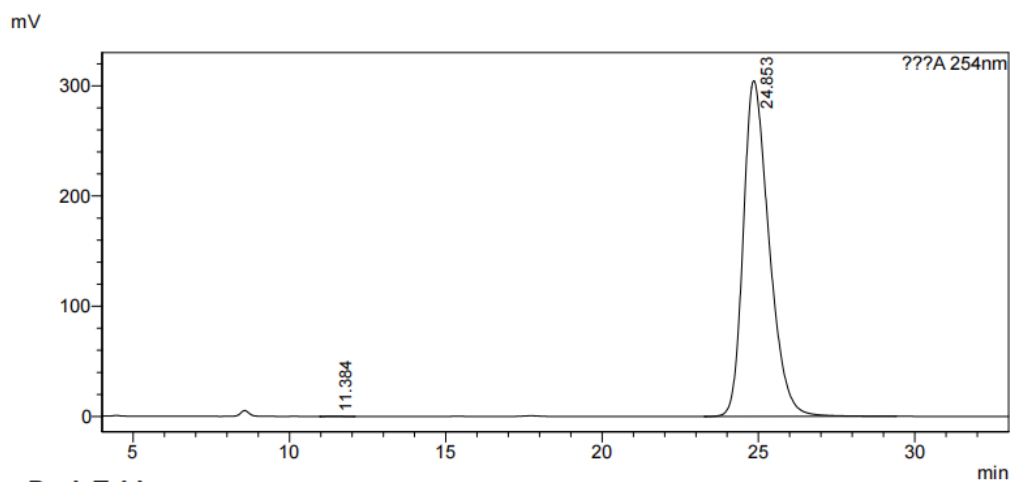

**<Peak Table>**

???A 254nm

| Peak# | Ret. Time | Area     | Height | Conc.  | Unit | Mark | Name |
|-------|-----------|----------|--------|--------|------|------|------|
| 1     | 11.384    | 6186     | 227    | 0.035  |      |      |      |
| 2     | 24.853    | 17499231 | 304590 | 99.965 |      |      |      |
| Total |           | 17505418 | 304818 |        |      |      |      |
